# Supplementary material for: The Biogeography of Dust in the Eastern Mediterranean
Source: Research Square preprint supplement (doi:10.21203/rs.3.rs-149876/v1), 2021-01-25
Supplement: Supplementary file 2 [file 81361de11b3ec4dc12429b59.xlsx]

## Sheet: Sheet1
Gene	Rs	q-value	level1	level2	level3	Cluster
PEX3; peroxin-3	-0.95	0.00101982	Cellular Processes	Transport and catabolism	04146 Peroxisome [PATH:ko04146]	1
OS9; protein OS-9	-0.95	0.00101982	Genetic Information Processing	Folding, sorting and degradation	04141 Protein processing in endoplasmic reticulum [PATH:ko04141]	1
GPI7; ethanolaminephosphotransferase [EC:2.7.-.-]	-0.95	0.00101982	Metabolism	Glycan biosynthesis and metabolism	00563 Glycosylphosphatidylinositol(GPI)-anchor biosynthesis [PATH:ko00563]	1
NMNAT; nicotinamide mononucleotide adenylyltransferase [EC:2.7.7.1 2.7.7.18]	-0.95	0.00101982	Metabolism	Metabolism of cofactors and vitamins	00760 Nicotinate and nicotinamide metabolism [PATH:ko00760]	1
HRAD1, RAD17; cell cycle checkpoint protein [EC:3.1.11.2]	-0.933333	0.0020874	Cellular Processes	Cell growth and death	04111 Cell cycle - yeast [PATH:ko04111]	1
PTS-Gat-EIIA, gatA; PTS system, galactitol-specific IIA component [EC:2.7.1.69]	-0.933333	0.0020874	Environmental Information Processing	Membrane transport	02060 Phosphotransferase system (PTS) [PATH:ko02060]	1
SUV39H, CLR4; histone-lysine N-methyltransferase SUV39H [EC:2.1.1.43]	-0.933333	0.0020874	Metabolism	Amino acid metabolism	00310 Lysine degradation [PATH:ko00310]	1
THI6; thiamine-phosphate diphosphorylase / hydroxyethylthiazole kinase [EC:2.5.1.3 2.7.1.50]	-0.933333	0.0020874	Metabolism	Metabolism of cofactors and vitamins	00730 Thiamine metabolism [PATH:ko00730]	1
E1.14.13.12; benzoate 4-monooxygenase [EC:1.14.13.12]	-0.933333	0.0020874	Metabolism	Xenobiotics biodegradation and metabolism	00362 Benzoate degradation [PATH:ko00362]	1
CAF120; CCR4-NOT transcriptional complex subunit CAF120	-0.916667	0.00363313	Genetic Information Processing	Folding, sorting and degradation	03018 RNA degradation [PATH:ko03018]	1
TLG1; member of the syntaxin family of t-SNAREs	-0.916667	0.00363313	Genetic Information Processing	Folding, sorting and degradation	04130 SNARE interactions in vesicular transport [PATH:ko04130]	1
RP-L7A; large subunit ribosomal protein L7A	-0.916667	0.00363313	Genetic Information Processing	Translation	03010 Ribosome [PATH:ko03010]	1
NUPL1; nucleoporin p58/p45	-0.916667	0.00363313	Genetic Information Processing	Translation	03013 RNA transport [PATH:ko03013]	1
PIGV; phosphatidylinositol glycan, class V [EC:2.4.1.-]	-0.916667	0.00363313	Metabolism	Glycan biosynthesis and metabolism	00563 Glycosylphosphatidylinositol(GPI)-anchor biosynthesis [PATH:ko00563]	1
MAD1; mitotic spindle assembly checkpoint protein MAD1	-0.9	0.00585222	Cellular Processes	Cell growth and death	04111 Cell cycle - yeast [PATH:ko04111]	1
RFXX; regulatory factor X, other	-0.9	0.00585222	Cellular Processes	Cell growth and death	04111 Cell cycle - yeast [PATH:ko04111]	1
PTS-Scr-EIIC, scrA; PTS system, sucrose-specific IIC component	-0.9	0.00585222	Environmental Information Processing	Membrane transport	02060 Phosphotransferase system (PTS) [PATH:ko02060]	1
SWP1, RPN2; oligosaccharyltransferase complex subunit delta (ribophorin II)	-0.9	0.00585222	Genetic Information Processing	Folding, sorting and degradation	04141 Protein processing in endoplasmic reticulum [PATH:ko04141]	1
RPC25, POLR3H; DNA-directed RNA polymerase III subunit RPC8	-0.9	0.00585222	Genetic Information Processing	Transcription	03020 RNA polymerase [PATH:ko03020]	1
ALG13; beta-1,4-N-acetylglucosaminyltransferase [EC:2.4.1.141]	-0.9	0.00585222	Metabolism	Glycan biosynthesis and metabolism	00510 N-Glycan biosynthesis [PATH:ko00510]	1
E3.6.1.43; dolichyldiphosphatase [EC:3.6.1.43]	-0.9	0.00585222	Metabolism	Glycan biosynthesis and metabolism	00510 N-Glycan biosynthesis [PATH:ko00510]	1
CKI1; choline kinase [EC:2.7.1.32]	-0.9	0.00585222	Metabolism	Lipid metabolism	00564 Glycerophospholipid metabolism [PATH:ko00564]	1
SOK2; protein SOK2	-0.883333	0.00864959	Cellular Processes	Cell growth and death	04113 Meiosis - yeast [PATH:ko04113]	1
PTS-Tre-EIIC, treB; PTS system, trehalose-specific IIC component	-0.883333	0.00864959	Environmental Information Processing	Membrane transport	02060 Phosphotransferase system (PTS) [PATH:ko02060]	1
STE12; transcription factor STE12	-0.883333	0.00864959	Environmental Information Processing	Signal transduction	04011 MAPK signaling pathway - yeast [PATH:ko04011]	1
EPS1; protein disulfide-isomerase [EC:5.3.4.1]	-0.883333	0.00864959	Genetic Information Processing	Folding, sorting and degradation	04141 Protein processing in endoplasmic reticulum [PATH:ko04141]	1
NDC1, TMEM48; nucleoporin NDC1	-0.883333	0.00864959	Genetic Information Processing	Translation	03013 RNA transport [PATH:ko03013]	1
THOC5; THO complex subunit 5	-0.883333	0.00864959	Genetic Information Processing	Translation	03013 RNA transport [PATH:ko03013]	1
rhaD; rhamnulose-1-phosphate aldolase [EC:4.1.2.19]	-0.883333	0.00864959	Metabolism	Carbohydrate metabolism	00040 Pentose and glucuronate interconversions [PATH:ko00040]	1
E2.7.2.7, buk; butyrate kinase [EC:2.7.2.7]	-0.883333	0.00864959	Metabolism	Carbohydrate metabolism	00650 Butanoate metabolism [PATH:ko00650]	1
CODH-ACSA; carbon monoxide dehydrogenase / acetyl-CoA synthase subunit alpha [EC:1.2.7.4 1.2.99.2 2.3.1.169]	-0.883333	0.00864959	Metabolism	Energy metabolism	00680 Methane metabolism [PATH:ko00680]	1
E1.12.7.2; ferredoxin hydrogenase [EC:1.12.7.2]	-0.883333	0.00864959	Metabolism	Energy metabolism	00680 Methane metabolism [PATH:ko00680]	1
PIGS; phosphatidylinositol glycan, class S	-0.883333	0.00864959	Metabolism	Glycan biosynthesis and metabolism	00563 Glycosylphosphatidylinositol(GPI)-anchor biosynthesis [PATH:ko00563]	1
ERG5; C-22 sterol desaturase [EC:1.14.14.-]	-0.883333	0.00864959	Metabolism	Lipid metabolism	00100 Steroid biosynthesis [PATH:ko00100]	1
PLB; lysophospholipase [EC:3.1.1.5]	-0.883333	0.00864959	Metabolism	Lipid metabolism	00564 Glycerophospholipid metabolism [PATH:ko00564]	1
SWI5; regulatory protein SWI5	-0.866667	0.0119802	Cellular Processes	Cell growth and death	04111 Cell cycle - yeast [PATH:ko04111]	1
PTS-Bgl-EIIB, bglF; PTS system, beta-glucosides-specific IIB component [EC:2.7.1.69]	-0.866667	0.0119802	Environmental Information Processing	Membrane transport	02060 Phosphotransferase system (PTS) [PATH:ko02060]	1
PTS-Scr-EIIB, scrA; PTS system, sucrose-specific IIB component [EC:2.7.1.69]	-0.866667	0.0119802	Environmental Information Processing	Membrane transport	02060 Phosphotransferase system (PTS) [PATH:ko02060]	1
BET1; blocked early in transport 1	-0.866667	0.0119802	Genetic Information Processing	Folding, sorting and degradation	04130 SNARE interactions in vesicular transport [PATH:ko04130]	1
STX8; syntaxin 8	-0.866667	0.0119802	Genetic Information Processing	Folding, sorting and degradation	04130 SNARE interactions in vesicular transport [PATH:ko04130]	1
POP4, RPP29; ribonuclease P protein subunit POP4 [EC:3.1.26.5]	-0.866667	0.0119802	Genetic Information Processing	Translation	03008 Ribosome biogenesis in eukaryotes [PATH:ko03008]	1
RP-L38e, RPL38; large subunit ribosomal protein L38e	-0.866667	0.0119802	Genetic Information Processing	Translation	03010 Ribosome [PATH:ko03010]	1
NUP54; nuclear pore complex protein Nup54	-0.866667	0.0119802	Genetic Information Processing	Translation	03013 RNA transport [PATH:ko03013]	1
E2.3.1.1; amino-acid N-acetyltransferase [EC:2.3.1.1]	-0.866667	0.0119802	Metabolism	Amino acid metabolism	00330 Arginine and proline metabolism [PATH:ko00330]	1
PHACA; phenylacetate 2-hydroxylase [EC:1.14.13.-]	-0.866667	0.0119802	Metabolism	Amino acid metabolism	00360 Phenylalanine metabolism [PATH:ko00360]	1
E3.2.1.96; mannosyl-glycoprotein endo-beta-N-acetylglucosaminidase [EC:3.2.1.96]	-0.866667	0.0119802	Metabolism	Glycan biosynthesis and metabolism	00511 Other glycan degradation [PATH:ko00511]	1
GPP1; glycerol 3-phosphatase 1 [EC:3.1.3.21]	-0.866667	0.0119802	Metabolism	Lipid metabolism	00561 Glycerolipid metabolism [PATH:ko00561]	1
E3.2.1.67; galacturan 1,4-alpha-galacturonidase [EC:3.2.1.67]	-0.866667	0.0119802	Metabolism	Carbohydrate metabolism	00040 Pentose and glucuronate interconversions [PATH:ko00040]	1
SSK1; osomolarity two-component system, response regulator SSK1	-0.866667	0.0119802	Environmental Information Processing	Signal transduction	02020 Two-component system [PATH:ko02020]	1
PEX19; peroxin-19	-0.85	0.0161686	Cellular Processes	Transport and catabolism	04146 Peroxisome [PATH:ko04146]	1
PTS-Gat-EIIC, gatC; PTS system, galactitol-specific IIC component	-0.85	0.0161686	Environmental Information Processing	Membrane transport	02060 Phosphotransferase system (PTS) [PATH:ko02060]	1
POLD4; DNA polymerase delta subunit 4	-0.85	0.0161686	Genetic Information Processing	Replication and repair	03030 DNA replication [PATH:ko03030]	1
E1.2.99.2C, cooS; carbon-monoxide dehydrogenase catalytic subunit [EC:1.2.99.2]	-0.85	0.0161686	Metabolism	Energy metabolism	00680 Methane metabolism [PATH:ko00680]	1
femA; peptidoglycan pentaglycine glycine transferase (the second and third glycine) [EC:2.3.2.17]	-0.85	0.0161686	Metabolism	Glycan biosynthesis and metabolism	00550 Peptidoglycan biosynthesis [PATH:ko00550]	1
E2.4.2.6; nucleoside deoxyribosyltransferase [EC:2.4.2.6]	-0.85	0.0161686	Metabolism	Nucleotide metabolism	00240 Pyrimidine metabolism [PATH:ko00240]	1
BUB2; cell cycle arrest protein BUB2	-0.833333	0.020874	Cellular Processes	Cell growth and death	04111 Cell cycle - yeast [PATH:ko04111]	1
IME2; meiosis induction protein kinase IME2/SME1 [EC:2.7.11.1]	-0.833333	0.020874	Cellular Processes	Cell growth and death	04113 Meiosis - yeast [PATH:ko04113]	1
TSG101, STP22, VPS23; ESCRT-I complex subunit TSG101	-0.833333	0.020874	Cellular Processes	Transport and catabolism	04144 Endocytosis [PATH:ko04144]	1
VTA1, LIP5; vacuolar protein sorting-associated protein VTA1	-0.833333	0.020874	Cellular Processes	Transport and catabolism	04144 Endocytosis [PATH:ko04144]	1
PTS-Dgl-EIIA, gamP; PTS system, D-glucosamine-specific IIA component [EC:2.7.1.69]	-0.833333	0.020874	Environmental Information Processing	Membrane transport	02060 Phosphotransferase system (PTS) [PATH:ko02060]	1
BEM1; bud emergence protein 1	-0.833333	0.020874	Environmental Information Processing	Signal transduction	04011 MAPK signaling pathway - yeast [PATH:ko04011]	1
CTU2, NCS2; cytoplasmic tRNA 2-thiolation protein 2	-0.833333	0.020874	Genetic Information Processing	Folding, sorting and degradation	04122 Sulfur relay system [PATH:ko04122]	1
URM1; ubiquitin related modifier 1	-0.833333	0.020874	Genetic Information Processing	Folding, sorting and degradation	04122 Sulfur relay system [PATH:ko04122]	1
SNAP23; synaptosomal-associated protein, 23kDa	-0.833333	0.020874	Genetic Information Processing	Folding, sorting and degradation	04130 SNARE interactions in vesicular transport [PATH:ko04130]	1
VAMP4; vesicle-associated membrane protein 4	-0.833333	0.020874	Genetic Information Processing	Folding, sorting and degradation	04130 SNARE interactions in vesicular transport [PATH:ko04130]	1
TFIIH3, GTF2H3, TFB4; transcription initiation factor TFIIH subunit 3	-0.833333	0.020874	Genetic Information Processing	Replication and repair	03420 Nucleotide excision repair [PATH:ko03420]	1
RPA12, ZNRD1; DNA-directed RNA polymerase I subunit RPA12	-0.833333	0.020874	Genetic Information Processing	Transcription	03020 RNA polymerase [PATH:ko03020]	1
RPA43; DNA-directed RNA polymerase I subunit RPA43	-0.833333	0.020874	Genetic Information Processing	Transcription	03020 RNA polymerase [PATH:ko03020]	1
SMNDC1, SPF30; survival of motor neuron-related-splicing factor 30	-0.833333	0.020874	Genetic Information Processing	Transcription	03040 Spliceosome [PATH:ko03040]	1
SNRPE, SME; small nuclear ribonucleoprotein E	-0.833333	0.020874	Genetic Information Processing	Transcription	03040 Spliceosome [PATH:ko03040]	1
RP-L36e, RPL36; large subunit ribosomal protein L36e	-0.833333	0.020874	Genetic Information Processing	Translation	03010 Ribosome [PATH:ko03010]	1
SMG1; PI-3-kinase-related kinase SMG-1	-0.833333	0.020874	Genetic Information Processing	Translation	03015 mRNA surveillance pathway [PATH:ko03015]	1
vorB; 2-oxoisovalerate ferredoxin oxidoreductase, beta subunit [EC:1.2.7.7]	-0.833333	0.020874	Metabolism	Amino acid metabolism	00280 Valine, leucine and isoleucine degradation [PATH:ko00280]	1
prdA; D-proline reductase (dithiol) PrdA [EC:1.21.4.1]	-0.833333	0.020874	Metabolism	Amino acid metabolism	00330 Arginine and proline metabolism [PATH:ko00330]	1
QUIB, qa-3; quinate dehydrogenase [EC:1.1.1.24]	-0.833333	0.020874	Metabolism	Amino acid metabolism	00400 Phenylalanine, tyrosine and tryptophan biosynthesis [PATH:ko00400]	1
KHK; ketohexokinase [EC:2.7.1.3]	-0.833333	0.020874	Metabolism	Carbohydrate metabolism	00051 Fructose and mannose metabolism [PATH:ko00051]	1
E3.2.1.122, glvA; maltose-6'-phosphate glucosidase [EC:3.2.1.122]	-0.833333	0.020874	Metabolism	Carbohydrate metabolism	00500 Starch and sucrose metabolism [PATH:ko00500]	1
ANP1; mannan polymerase II complex ANP1 subunit [EC:2.4.1.-]	-0.833333	0.020874	Metabolism	Glycan biosynthesis and metabolism	00513 Various types of N-glycan biosynthesis [PATH:ko00513]	1
PIGP, GPI19, DSCR5; phosphatidylinositol glycan, class P	-0.833333	0.020874	Metabolism	Glycan biosynthesis and metabolism	00563 Glycosylphosphatidylinositol(GPI)-anchor biosynthesis [PATH:ko00563]	1
EBP; cholestenol delta-isomerase [EC:5.3.3.5]	-0.833333	0.020874	Metabolism	Lipid metabolism	00100 Steroid biosynthesis [PATH:ko00100]	1
ERG27; 3-keto steroid reductase [EC:1.1.1.270]	-0.833333	0.020874	Metabolism	Lipid metabolism	00100 Steroid biosynthesis [PATH:ko00100]	1
LAG1; Acyl-CoA-dependent ceramide synthase [EC:2.3.1.24]	-0.833333	0.020874	Metabolism	Lipid metabolism	00600 Sphingolipid metabolism [PATH:ko00600]	1
GCLM; glutamate--cysteine ligase regulatory subunit	-0.833333	0.020874	Metabolism	Metabolism of other amino acids	00480 Glutathione metabolism [PATH:ko00480]	1
WSC; cell wall integrity and stress response component	-0.833333	0.020874	Environmental Information Processing	Signal transduction	04011 MAPK signaling pathway - yeast [PATH:ko04011]	1
PHO81; CDK inhibitor PHO81	-0.816667	0.0264014	Cellular Processes	Cell growth and death	04111 Cell cycle - yeast [PATH:ko04111]	1
PTS-Arb-EIIB, glvB; PTS system, arbutin-like IIB component [EC:2.7.1.69]	-0.816667	0.0264014	Environmental Information Processing	Membrane transport	02060 Phosphotransferase system (PTS) [PATH:ko02060]	1
GOSR1, GOS1; golgi SNAP receptor complex member 1	-0.816667	0.0264014	Genetic Information Processing	Folding, sorting and degradation	04130 SNARE interactions in vesicular transport [PATH:ko04130]	1
VTI1; vesicle transport through interaction with t-SNAREs 1	-0.816667	0.0264014	Genetic Information Processing	Folding, sorting and degradation	04130 SNARE interactions in vesicular transport [PATH:ko04130]	1
NUP62; nuclear pore complex protein Nup62	-0.816667	0.0264014	Genetic Information Processing	Translation	03013 RNA transport [PATH:ko03013]	1
E4.6.1.13, plc; 1-phosphatidylinositol phosphodiesterase [EC:4.6.1.13]	-0.816667	0.0264014	Metabolism	Carbohydrate metabolism	00562 Inositol phosphate metabolism [PATH:ko00562]	1
E3.6.3.10; H+/K+-exchanging ATPase [EC:3.6.3.10]	-0.816667	0.0264014	Metabolism	Energy metabolism	00190 Oxidative phosphorylation [PATH:ko00190]	1
cdhE; acetyl-CoA decarbonylase/synthase complex subunit gamma [EC:2.1.1.245]	-0.816667	0.0264014	Metabolism	Energy metabolism	00680 Methane metabolism [PATH:ko00680]	1
E3.1.3.37; sedoheptulose-bisphosphatase [EC:3.1.3.37]	-0.816667	0.0264014	Metabolism	Energy metabolism	00710 Carbon fixation in photosynthetic organisms [PATH:ko00710]	1
PIGQ, GPI1; phosphatidylinositol glycan, class Q	-0.816667	0.0264014	Metabolism	Glycan biosynthesis and metabolism	00563 Glycosylphosphatidylinositol(GPI)-anchor biosynthesis [PATH:ko00563]	1
RAD9; DNA repair protein RAD9	-0.8	0.0326626	Cellular Processes	Cell growth and death	04111 Cell cycle - yeast [PATH:ko04111]	1
EPN; epsin	-0.8	0.0326626	Cellular Processes	Transport and catabolism	04144 Endocytosis [PATH:ko04144]	1
PTS-Tre-EIIB, treB; PTS system, trehalose-specific IIB component [EC:2.7.1.69]	-0.8	0.0326626	Environmental Information Processing	Membrane transport	02060 Phosphotransferase system (PTS) [PATH:ko02060]	1
vraS; two-component system, NarL family, vancomycin resistance sensor histidine kinase VraS [EC:2.7.13.3]	-0.8	0.0326626	Environmental Information Processing	Signal transduction	02020 Two-component system [PATH:ko02020]	1
SEC20; protein transport protein SEC20	-0.8	0.0326626	Genetic Information Processing	Folding, sorting and degradation	04130 SNARE interactions in vesicular transport [PATH:ko04130]	1
OST2, DAD1; oligosaccharyltransferase complex subunit epsilon	-0.8	0.0326626	Genetic Information Processing	Folding, sorting and degradation	04141 Protein processing in endoplasmic reticulum [PATH:ko04141]	1
SRRM1, SRM160; serine/arginine repetitive matrix protein 1	-0.8	0.0326626	Genetic Information Processing	Translation	03013 RNA transport [PATH:ko03013]	1
ELO3; fatty acid elongase 3 [EC:2.3.1.199]	-0.8	0.0326626	Metabolism	Lipid metabolism	00062 Fatty acid elongation [PATH:ko00062]	1
yfbR; 5'-nucleotidase [EC:3.1.3.5]	-0.8	0.0326626	Metabolism	Metabolism of cofactors and vitamins	00760 Nicotinate and nicotinamide metabolism [PATH:ko00760]	1
allD; ureidoglycolate dehydrogenase [EC:1.1.1.154]	-0.8	0.0326626	Metabolism	Nucleotide metabolism	00230 Purine metabolism [PATH:ko00230]	1
ttrA; tetrathionate reductase subunit A	-0.8	0.0326626	Environmental Information Processing	Signal transduction	02020 Two-component system [PATH:ko02020]	1
SHO1; SHO1 osmosensor	-0.8	0.0326626	Environmental Information Processing	Signal transduction	04011 MAPK signaling pathway - yeast [PATH:ko04011]	1
CHMP6, VPS20; charged multivesicular body protein 6	-0.783333	0.0397463	Cellular Processes	Transport and catabolism	04144 Endocytosis [PATH:ko04144]	1
bceB; bacitracin transport system permease protein	-0.783333	0.0397463	Environmental Information Processing	Membrane transport	02010 ABC transporters [PATH:ko02010]	1
PTS-Lac-EIIC, lacE; PTS system, lactose-specific IIC component	-0.783333	0.0397463	Environmental Information Processing	Membrane transport	02060 Phosphotransferase system (PTS) [PATH:ko02060]	1
narT; MFS transporter, NNP family, putative nitrate transporter	-0.783333	0.0397463	Environmental Information Processing	Signal transduction	02020 Two-component system [PATH:ko02020]	1
STE2; pheromone alpha factor receptor	-0.783333	0.0397463	Environmental Information Processing	Signal transduction	04011 MAPK signaling pathway - yeast [PATH:ko04011]	1
STE3; pheromone a factor receptor	-0.783333	0.0397463	Environmental Information Processing	Signal transduction	04011 MAPK signaling pathway - yeast [PATH:ko04011]	1
C1D, LRP1; exosome complex protein LRP1	-0.783333	0.0397463	Genetic Information Processing	Folding, sorting and degradation	03018 RNA degradation [PATH:ko03018]	1
SKI8; superkiller protein 8	-0.783333	0.0397463	Genetic Information Processing	Folding, sorting and degradation	03018 RNA degradation [PATH:ko03018]	1
ERCC8, CKN1, CSA; DNA excision repair protein ERCC-8	-0.783333	0.0397463	Genetic Information Processing	Folding, sorting and degradation	04120 Ubiquitin mediated proteolysis [PATH:ko04120]	1
POL4; DNA polymerase IV [EC:2.7.7.7]	-0.783333	0.0397463	Genetic Information Processing	Replication and repair	03450 Non-homologous end-joining [PATH:ko03450]	1
RPC31, POLR3G; DNA-directed RNA polymerase III subunit RPC7	-0.783333	0.0397463	Genetic Information Processing	Transcription	03020 RNA polymerase [PATH:ko03020]	1
TFIIA2, GTF2A2, TOA2; transcription initiation factor TFIIA small subunit	-0.783333	0.0397463	Genetic Information Processing	Transcription	03022 Basal transcription factors [PATH:ko03022]	1
SNRPG, SMG; small nuclear ribonucleoprotein G	-0.783333	0.0397463	Genetic Information Processing	Transcription	03040 Spliceosome [PATH:ko03040]	1
CLNS1A; chloride channel, nucleotide-sensitive, 1A	-0.783333	0.0397463	Genetic Information Processing	Translation	03013 RNA transport [PATH:ko03013]	1
korD; 2-oxoglutarate ferredoxin oxidoreductase subunit delta [EC:1.2.7.3]	-0.783333	0.0397463	Metabolism	Carbohydrate metabolism	00020 Citrate cycle (TCA cycle) [PATH:ko00020]	1
ATPVF, ntpF; V-type H+-transporting ATPase subunit F [EC:3.6.3.14]	-0.783333	0.0397463	Metabolism	Energy metabolism	00190 Oxidative phosphorylation [PATH:ko00190]	1
NIAD; nitrate reductase (NADPH) [EC:1.7.1.3]	-0.783333	0.0397463	Metabolism	Energy metabolism	00910 Nitrogen metabolism [PATH:ko00910]	1
PIGH, GPI15; phosphatidylinositol glycan, class H	-0.783333	0.0397463	Metabolism	Glycan biosynthesis and metabolism	00563 Glycosylphosphatidylinositol(GPI)-anchor biosynthesis [PATH:ko00563]	1
E2.7.6.5X; putative GTP pyrophosphokinase [EC:2.7.6.5]	-0.783333	0.0397463	Metabolism	Nucleotide metabolism	00230 Purine metabolism [PATH:ko00230]	1
E4.6.1.1B, cyaB; adenylate cyclase, class 2 [EC:4.6.1.1]	-0.783333	0.0397463	Metabolism	Nucleotide metabolism	00230 Purine metabolism [PATH:ko00230]	1
PXMP4, PMP24; peroxisomal membrane protein 4	-0.766667	0.0476383	Cellular Processes	Transport and catabolism	04146 Peroxisome [PATH:ko04146]	1
PTS-Cel-EIIB, celA; PTS system, cellobiose-specific IIB component [EC:2.7.1.69]	-0.766667	0.0476383	Environmental Information Processing	Membrane transport	02060 Phosphotransferase system (PTS) [PATH:ko02060]	1
E2.4.1.5; dextransucrase [EC:2.4.1.5]	-0.766667	0.0476383	Environmental Information Processing	Signal transduction	02020 Two-component system [PATH:ko02020]	1
POMP, UMP1; proteasome maturation protein	-0.766667	0.0476383	Genetic Information Processing	Folding, sorting and degradation	03050 Proteasome [PATH:ko03050]	1
SRPRB, SRP102; signal recognition particle receptor subunit beta	-0.766667	0.0476383	Genetic Information Processing	Folding, sorting and degradation	03060 Protein export [PATH:ko03060]	1
RPB8, POLR2H; DNA-directed RNA polymerases I, II, and III subunit RPABC3	-0.766667	0.0476383	Genetic Information Processing	Transcription	03020 RNA polymerase [PATH:ko03020]	1
rpoE; DNA-directed RNA polymerase subunit delta	-0.766667	0.0476383	Genetic Information Processing	Transcription	03020 RNA polymerase [PATH:ko03020]	1
TFIIF2, GTF2F2, TFG2; transcription initiation factor TFIIF subunit beta [EC:3.6.4.12]	-0.766667	0.0476383	Genetic Information Processing	Transcription	03022 Basal transcription factors [PATH:ko03022]	1
THOC4, ALY; THO complex subunit 4	-0.766667	0.0476383	Genetic Information Processing	Transcription	03040 Spliceosome [PATH:ko03040]	1
Tam1; tryptophan aminotransferase [EC:2.6.1.27]	-0.766667	0.0476383	Metabolism	Amino acid metabolism	00380 Tryptophan metabolism [PATH:ko00380]	1
E1.2.1.2B2; formate dehydrogenase, beta subunit [EC:1.2.1.2]	-0.766667	0.0476383	Metabolism	Carbohydrate metabolism	00630 Glyoxylate and dicarboxylate metabolism [PATH:ko00630]	1
E6.3.2.7, murE; UDP-N-acetylmuramoyl-L-alanyl-D-glutamate-L-lysine ligase [EC:6.3.2.7]	-0.766667	0.0476383	Metabolism	Glycan biosynthesis and metabolism	00550 Peptidoglycan biosynthesis [PATH:ko00550]	1
SUR2; C4-hydroxylase [EC:1.14.-.-]	-0.766667	0.0476383	Metabolism	Lipid metabolism	00600 Sphingolipid metabolism [PATH:ko00600]	1
YPD1; osomolarity two-component system, phosphorelay intermediate protein YPD1	-0.766667	0.0476383	Environmental Information Processing	Signal transduction	02020 Two-component system [PATH:ko02020]	1
TAF1; transcription initiation factor TFIID subunit 1	-0.983333	5.01129e-05	Genetic Information Processing	Transcription	03022 Basal transcription factors [PATH:ko03022]	2
DMC1; meiotic recombination protein DMC1	-0.966667	0.000334462	Cellular Processes	Cell growth and death	04113 Meiosis - yeast [PATH:ko04113]	2
OST1, RPN1; oligosaccharyltransferase complex subunit alpha (ribophorin I)	-0.966667	0.000334462	Genetic Information Processing	Folding, sorting and degradation	04141 Protein processing in endoplasmic reticulum [PATH:ko04141]	2
PRKCSH; protein kinase C substrate 80K-H	-0.966667	0.000334462	Genetic Information Processing	Folding, sorting and degradation	04141 Protein processing in endoplasmic reticulum [PATH:ko04141]	2
CDC28, CDC2; cyclin-dependent kinase [EC:2.7.11.22]	-0.95	0.00101982	Cellular Processes	Cell growth and death	04111 Cell cycle - yeast [PATH:ko04111]	2
SCC2, NIPBL; cohesin loading factor subunit SCC2	-0.95	0.00101982	Cellular Processes	Cell growth and death	04111 Cell cycle - yeast [PATH:ko04111]	2
ABCD2, ALDL1; ATP-binding cassette, subfamily D (ALD), member 2	-0.95	0.00101982	Cellular Processes	Transport and catabolism	04146 Peroxisome [PATH:ko04146]	2
STX16; syntaxin 16	-0.95	0.00101982	Genetic Information Processing	Folding, sorting and degradation	04130 SNARE interactions in vesicular transport [PATH:ko04130]	2
SLU7; pre-mRNA-processing factor SLU7	-0.95	0.00101982	Genetic Information Processing	Transcription	03040 Spliceosome [PATH:ko03040]	2
GAA1; glycosylphosphatidylinositol transamidase	-0.95	0.00101982	Metabolism	Glycan biosynthesis and metabolism	00563 Glycosylphosphatidylinositol(GPI)-anchor biosynthesis [PATH:ko00563]	2
SRP68; signal recognition particle subunit SRP68	-0.933333	0.0020874	Genetic Information Processing	Folding, sorting and degradation	03060 Protein export [PATH:ko03060]	2
MARCH6, DOA10; E3 ubiquitin-protein ligase MARCH6 [EC:6.3.2.19]	-0.933333	0.0020874	Genetic Information Processing	Folding, sorting and degradation	04141 Protein processing in endoplasmic reticulum [PATH:ko04141]	2
SEL1, SEL1L; SEL1 protein	-0.933333	0.0020874	Genetic Information Processing	Folding, sorting and degradation	04141 Protein processing in endoplasmic reticulum [PATH:ko04141]	2
BUD31, G10; bud site selection protein 31	-0.933333	0.0020874	Genetic Information Processing	Transcription	03040 Spliceosome [PATH:ko03040]	2
PRPF38A; pre-mRNA-splicing factor 38A	-0.933333	0.0020874	Genetic Information Processing	Transcription	03040 Spliceosome [PATH:ko03040]	2
RAN; GTP-binding nuclear protein Ran	-0.933333	0.0020874	Genetic Information Processing	Translation	03008 Ribosome biogenesis in eukaryotes [PATH:ko03008]	2
RP-S24e, RPS24; small subunit ribosomal protein S24e	-0.933333	0.0020874	Genetic Information Processing	Translation	03010 Ribosome [PATH:ko03010]	2
NUP93; nuclear pore complex protein Nup93	-0.933333	0.0020874	Genetic Information Processing	Translation	03013 RNA transport [PATH:ko03013]	2
STRAP, UNRIP; serine-threonine kinase receptor-associated protein	-0.933333	0.0020874	Genetic Information Processing	Translation	03013 RNA transport [PATH:ko03013]	2
E1.2.1.24; succinate-semialdehyde dehydrogenase [EC:1.2.1.24]	-0.933333	0.0020874	Metabolism	Amino acid metabolism	00250 Alanine, aspartate and glutamate metabolism [PATH:ko00250]	2
PIGO; phosphatidylinositol glycan, class O	-0.933333	0.0020874	Metabolism	Glycan biosynthesis and metabolism	00563 Glycosylphosphatidylinositol(GPI)-anchor biosynthesis [PATH:ko00563]	2
HSD17B12, KAR, IFA38; 17beta-estradiol 17-dehydrogenase / very-long-chain 3-oxoacyl-CoA reductase [EC:1.1.1.62 1.1.1.330]	-0.933333	0.0020874	Metabolism	Lipid metabolism	00062 Fatty acid elongation [PATH:ko00062]	2
MTD1; methylenetetrahydrofolate dehydrogenase (NAD+) [EC:1.5.1.15]	-0.933333	0.0020874	Metabolism	Metabolism of cofactors and vitamins	00670 One carbon pool by folate [PATH:ko00670]	2
SNF1; carbon catabolite-derepressing protein kinase [EC:2.7.11.1]	-0.916667	0.00363313	Cellular Processes	Cell growth and death	04113 Meiosis - yeast [PATH:ko04113]	2
STE11; mitogen-activated protein kinase kinase kinase [EC:2.7.11.1]	-0.916667	0.00363313	Environmental Information Processing	Signal transduction	04011 MAPK signaling pathway - yeast [PATH:ko04011]	2
LSM6; U6 snRNA-associated Sm-like protein LSm6	-0.916667	0.00363313	Genetic Information Processing	Folding, sorting and degradation	03018 RNA degradation [PATH:ko03018]	2
PSMA5; 20S proteasome subunit alpha 5 [EC:3.4.25.1]	-0.916667	0.00363313	Genetic Information Processing	Folding, sorting and degradation	03050 Proteasome [PATH:ko03050]	2
CUL4; cullin 4	-0.916667	0.00363313	Genetic Information Processing	Folding, sorting and degradation	04120 Ubiquitin mediated proteolysis [PATH:ko04120]	2
STUB1, CHIP; STIP1 homology and U-box containing protein 1 [EC:6.3.2.19]	-0.916667	0.00363313	Genetic Information Processing	Folding, sorting and degradation	04120 Ubiquitin mediated proteolysis [PATH:ko04120]	2
UBE2Q; ubiquitin-conjugating enzyme E2 Q [EC:6.3.2.19]	-0.916667	0.00363313	Genetic Information Processing	Folding, sorting and degradation	04120 Ubiquitin mediated proteolysis [PATH:ko04120]	2
UBE3C; ubiquitin-protein ligase E3 C [EC:6.3.2.19]	-0.916667	0.00363313	Genetic Information Processing	Folding, sorting and degradation	04120 Ubiquitin mediated proteolysis [PATH:ko04120]	2
GOSR2, BOS1; golgi SNAP receptor complex member 2	-0.916667	0.00363313	Genetic Information Processing	Folding, sorting and degradation	04130 SNARE interactions in vesicular transport [PATH:ko04130]	2
DERL2_3; Derlin-2/3	-0.916667	0.00363313	Genetic Information Processing	Folding, sorting and degradation	04141 Protein processing in endoplasmic reticulum [PATH:ko04141]	2
EDEM1; ER degradation enhancer, mannosidase alpha-like 1	-0.916667	0.00363313	Genetic Information Processing	Folding, sorting and degradation	04141 Protein processing in endoplasmic reticulum [PATH:ko04141]	2
SAR1; GTP-binding protein SAR1 [EC:3.6.5.-]	-0.916667	0.00363313	Genetic Information Processing	Folding, sorting and degradation	04141 Protein processing in endoplasmic reticulum [PATH:ko04141]	2
SHP1, UBX1, NSFL1C; UBX domain-containing protein 1	-0.916667	0.00363313	Genetic Information Processing	Folding, sorting and degradation	04141 Protein processing in endoplasmic reticulum [PATH:ko04141]	2
WBP1; oligosaccharyltransferase complex subunit beta	-0.916667	0.00363313	Genetic Information Processing	Folding, sorting and degradation	04141 Protein processing in endoplasmic reticulum [PATH:ko04141]	2
RFA2, RPA2; replication factor A2	-0.916667	0.00363313	Genetic Information Processing	Replication and repair	03030 DNA replication [PATH:ko03030]	2
RAD54B; DNA repair and recombination protein RAD54B [EC:3.6.4.-]	-0.916667	0.00363313	Genetic Information Processing	Replication and repair	03440 Homologous recombination [PATH:ko03440]	2
RP-L11e, RPL11; large subunit ribosomal protein L11e	-0.916667	0.00363313	Genetic Information Processing	Translation	03010 Ribosome [PATH:ko03010]	2
RP-L18e, RPL18; large subunit ribosomal protein L18e	-0.916667	0.00363313	Genetic Information Processing	Translation	03010 Ribosome [PATH:ko03010]	2
RP-L23e, RPL23; large subunit ribosomal protein L23e	-0.916667	0.00363313	Genetic Information Processing	Translation	03010 Ribosome [PATH:ko03010]	2
EIF3G; translation initiation factor 3 subunit G	-0.916667	0.00363313	Genetic Information Processing	Translation	03013 RNA transport [PATH:ko03013]	2
NUP155; nuclear pore complex protein Nup155	-0.916667	0.00363313	Genetic Information Processing	Translation	03013 RNA transport [PATH:ko03013]	2
CPSF1, CFT1; cleavage and polyadenylation specificity factor subunit 1	-0.916667	0.00363313	Genetic Information Processing	Translation	03015 mRNA surveillance pathway [PATH:ko03015]	2
MSI; RNA-binding protein Musashi	-0.916667	0.00363313	Genetic Information Processing	Translation	03015 mRNA surveillance pathway [PATH:ko03015]	2
SETD1, SET1; histone-lysine N-methyltransferase SETD1 [EC:2.1.1.43]	-0.916667	0.00363313	Metabolism	Amino acid metabolism	00310 Lysine degradation [PATH:ko00310]	2
ALG11; alpha-1,2-mannosyltransferase [EC:2.4.1.-]	-0.916667	0.00363313	Metabolism	Glycan biosynthesis and metabolism	00510 N-Glycan biosynthesis [PATH:ko00510]	2
PIGN; phosphatidylinositol glycan, class N [EC:2.7.-.-]	-0.916667	0.00363313	Metabolism	Glycan biosynthesis and metabolism	00563 Glycosylphosphatidylinositol(GPI)-anchor biosynthesis [PATH:ko00563]	2
PIGZ, SMP3; phosphatidylinositol glycan, class Z [EC:2.4.1.-]	-0.916667	0.00363313	Metabolism	Glycan biosynthesis and metabolism	00563 Glycosylphosphatidylinositol(GPI)-anchor biosynthesis [PATH:ko00563]	2
ERG2; C-8 sterol isomerase [EC:5.-.-.-]	-0.916667	0.00363313	Metabolism	Lipid metabolism	00100 Steroid biosynthesis [PATH:ko00100]	2
ARFGAP1; ADP-ribosylation factor GTPase-activating protein 1	-0.9	0.00585222	Cellular Processes	Transport and catabolism	04144 Endocytosis [PATH:ko04144]	2
USP8, UBP5; ubiquitin carboxyl-terminal hydrolase 8 [EC:3.1.2.15]	-0.9	0.00585222	Cellular Processes	Transport and catabolism	04144 Endocytosis [PATH:ko04144]	2
PSMD11, RPN6; 26S proteasome regulatory subunit N6	-0.9	0.00585222	Genetic Information Processing	Folding, sorting and degradation	03050 Proteasome [PATH:ko03050]	2
PSMD14, RPN11, POH1; 26S proteasome regulatory subunit N11	-0.9	0.00585222	Genetic Information Processing	Folding, sorting and degradation	03050 Proteasome [PATH:ko03050]	2
UBLE1B, SAE2, UBA2; ubiquitin-like 1-activating enzyme E1 B [EC:6.3.2.19]	-0.9	0.00585222	Genetic Information Processing	Folding, sorting and degradation	04120 Ubiquitin mediated proteolysis [PATH:ko04120]	2
PLAA, DOA1, UFD3; phospholipase A-2-activating protein	-0.9	0.00585222	Genetic Information Processing	Folding, sorting and degradation	04141 Protein processing in endoplasmic reticulum [PATH:ko04141]	2
TFIIH2, GTF2H2, SSL1; transcription initiation factor TFIIH subunit 2	-0.9	0.00585222	Genetic Information Processing	Replication and repair	03420 Nucleotide excision repair [PATH:ko03420]	2
PMS2; DNA mismatch repair protein PMS2	-0.9	0.00585222	Genetic Information Processing	Replication and repair	03430 Mismatch repair [PATH:ko03430]	2
SNRNP40, PRP8BP; Prp8 binding protein	-0.9	0.00585222	Genetic Information Processing	Transcription	03040 Spliceosome [PATH:ko03040]	2
NMD3; nonsense-mediated mRNA decay protein 3	-0.9	0.00585222	Genetic Information Processing	Translation	03008 Ribosome biogenesis in eukaryotes [PATH:ko03008]	2
EIF2B4; translation initiation factor eIF-2B subunit delta	-0.9	0.00585222	Genetic Information Processing	Translation	03013 RNA transport [PATH:ko03013]	2
SETD2, SET2; histone-lysine N-methyltransferase SETD2 [EC:2.1.1.43]	-0.9	0.00585222	Metabolism	Amino acid metabolism	00310 Lysine degradation [PATH:ko00310]	2
E5.4.2.3; phosphoacetylglucosamine mutase [EC:5.4.2.3]	-0.9	0.00585222	Metabolism	Carbohydrate metabolism	00520 Amino sugar and nucleotide sugar metabolism [PATH:ko00520]	2
ALG9; alpha-1,2-mannosyltransferase [EC:2.4.1.259 2.4.1.261]	-0.9	0.00585222	Metabolism	Glycan biosynthesis and metabolism	00510 N-Glycan biosynthesis [PATH:ko00510]	2
E1.14.13.72, SC4MOL, ERG25; methylsterol monooxygenase [EC:1.14.13.72]	-0.9	0.00585222	Metabolism	Lipid metabolism	00100 Steroid biosynthesis [PATH:ko00100]	2
E4.4.1.17; cytochrome c heme-lyase [EC:4.4.1.17]	-0.9	0.00585222	Metabolism	Metabolism of cofactors and vitamins	00860 Porphyrin and chlorophyll metabolism [PATH:ko00860]	2
PEX5, PXR1; peroxin-5	-0.883333	0.00864959	Cellular Processes	Transport and catabolism	04146 Peroxisome [PATH:ko04146]	2
STE7; mitogen-activated protein kinase kinase [EC:2.7.12.2]	-0.883333	0.00864959	Environmental Information Processing	Signal transduction	04011 MAPK signaling pathway - yeast [PATH:ko04011]	2
TPR; nucleoprotein TPR	-0.883333	0.00864959	Environmental Information Processing	Signal transduction	04011 MAPK signaling pathway - yeast [PATH:ko04011]	2
RRP45, EXOSC9; exosome complex component RRP45	-0.883333	0.00864959	Genetic Information Processing	Folding, sorting and degradation	03018 RNA degradation [PATH:ko03018]	2
PSMA4; 20S proteasome subunit alpha 3 [EC:3.4.25.1]	-0.883333	0.00864959	Genetic Information Processing	Folding, sorting and degradation	03050 Proteasome [PATH:ko03050]	2
POLA2; DNA polymerase alpha subunit B	-0.883333	0.00864959	Genetic Information Processing	Replication and repair	03030 DNA replication [PATH:ko03030]	2
RNASEH2A; ribonuclease H2 subunit A [EC:3.1.26.4]	-0.883333	0.00864959	Genetic Information Processing	Replication and repair	03030 DNA replication [PATH:ko03030]	2
ERCC5, XPG, RAD2; DNA excision repair protein ERCC-5	-0.883333	0.00864959	Genetic Information Processing	Replication and repair	03420 Nucleotide excision repair [PATH:ko03420]	2
MRE11; double-strand break repair protein MRE11	-0.883333	0.00864959	Genetic Information Processing	Replication and repair	03440 Homologous recombination [PATH:ko03440]	2
CDC5L, CDC5, CEF1; pre-mRNA-splicing factor CDC5/CEF1	-0.883333	0.00864959	Genetic Information Processing	Transcription	03040 Spliceosome [PATH:ko03040]	2
PRPF3, PRP3; U4/U6 small nuclear ribonucleoprotein PRP3	-0.883333	0.00864959	Genetic Information Processing	Transcription	03040 Spliceosome [PATH:ko03040]	2
RBM8A, Y14; RNA-binding protein 8A	-0.883333	0.00864959	Genetic Information Processing	Transcription	03040 Spliceosome [PATH:ko03040]	2
SF3B14; pre-mRNA branch site protein p14	-0.883333	0.00864959	Genetic Information Processing	Transcription	03040 Spliceosome [PATH:ko03040]	2
RP-L18Ae, RPL18A; large subunit ribosomal protein L18Ae	-0.883333	0.00864959	Genetic Information Processing	Translation	03010 Ribosome [PATH:ko03010]	2
RP-L27Ae, RPL27A; large subunit ribosomal protein L27Ae	-0.883333	0.00864959	Genetic Information Processing	Translation	03010 Ribosome [PATH:ko03010]	2
RP-L35Ae, RPL35A; large subunit ribosomal protein L35Ae	-0.883333	0.00864959	Genetic Information Processing	Translation	03010 Ribosome [PATH:ko03010]	2
ALG8; alpha-1,3-glucosyltransferase [EC:2.4.1.265]	-0.883333	0.00864959	Metabolism	Glycan biosynthesis and metabolism	00510 N-Glycan biosynthesis [PATH:ko00510]	2
RFT1; oligosaccharidyl-lipid flippase family	-0.883333	0.00864959	Metabolism	Glycan biosynthesis and metabolism	00510 N-Glycan biosynthesis [PATH:ko00510]	2
E2.7.4.2, mvaK2; phosphomevalonate kinase [EC:2.7.4.2]	-0.883333	0.00864959	Metabolism	Metabolism of terpenoids and polyketides	00900 Terpenoid backbone biosynthesis [PATH:ko00900]	2
SQLE, ERG1; squalene monooxygenase [EC:1.14.13.132]	-0.883333	0.00864959	Metabolism	Metabolism of terpenoids and polyketides	00909 Sesquiterpenoid and triterpenoid biosynthesis [PATH:ko00909]	2
HRAD17, RAD24; cell cycle checkpoint protein	-0.866667	0.0119802	Cellular Processes	Cell growth and death	04111 Cell cycle - yeast [PATH:ko04111]	2
ATPeVC, ATP6C; V-type H+-transporting ATPase subunit C [EC:3.6.3.14]	-0.866667	0.0119802	Cellular Processes	Transport and catabolism	04145 Phagosome [PATH:ko04145]	2
ECH1; delta(3,5)-Delta(2,4)-dienoyl-CoA isomerase [EC:5.3.3.-]	-0.866667	0.0119802	Cellular Processes	Transport and catabolism	04146 Peroxisome [PATH:ko04146]	2
CUL3; cullin 3	-0.866667	0.0119802	Genetic Information Processing	Folding, sorting and degradation	04120 Ubiquitin mediated proteolysis [PATH:ko04120]	2
UBE2H, UBC8; ubiquitin-conjugating enzyme E2 H [EC:6.3.2.19]	-0.866667	0.0119802	Genetic Information Processing	Folding, sorting and degradation	04120 Ubiquitin mediated proteolysis [PATH:ko04120]	2
UBE4B, UFD2; ubiquitin conjugation factor E4 B [EC:6.3.2.19]	-0.866667	0.0119802	Genetic Information Processing	Folding, sorting and degradation	04120 Ubiquitin mediated proteolysis [PATH:ko04120]	2
XPC; xeroderma pigmentosum group C-complementing protein	-0.866667	0.0119802	Genetic Information Processing	Replication and repair	03420 Nucleotide excision repair [PATH:ko03420]	2
NCBP1, CBP80; nuclear cap-binding protein subunit 1	-0.866667	0.0119802	Genetic Information Processing	Transcription	03040 Spliceosome [PATH:ko03040]	2
SF3A3, SAP61, PRP9; splicing factor 3A subunit 3	-0.866667	0.0119802	Genetic Information Processing	Transcription	03040 Spliceosome [PATH:ko03040]	2
SF3B2, SAP145, CUS1; splicing factor 3B subunit 2	-0.866667	0.0119802	Genetic Information Processing	Transcription	03040 Spliceosome [PATH:ko03040]	2
RP-L13e, RPL13; large subunit ribosomal protein L13e	-0.866667	0.0119802	Genetic Information Processing	Translation	03010 Ribosome [PATH:ko03010]	2
RP-L7e, RPL7; large subunit ribosomal protein L7e	-0.866667	0.0119802	Genetic Information Processing	Translation	03010 Ribosome [PATH:ko03010]	2
RP-S13e, RPS13; small subunit ribosomal protein S13e	-0.866667	0.0119802	Genetic Information Processing	Translation	03010 Ribosome [PATH:ko03010]	2
EIF2B3; translation initiation factor eIF-2B subunit gamma	-0.866667	0.0119802	Genetic Information Processing	Translation	03013 RNA transport [PATH:ko03013]	2
TGS1; trimethylguanosine synthase [EC:2.1.1.-]	-0.866667	0.0119802	Genetic Information Processing	Translation	03013 RNA transport [PATH:ko03013]	2
HBS1; elongation factor 1 alpha-like protein	-0.866667	0.0119802	Genetic Information Processing	Translation	03015 mRNA surveillance pathway [PATH:ko03015]	2
ALG2; alpha-1,3/alpha-1,6-mannosyltransferase [EC:2.4.1.132 2.4.1.257]	-0.866667	0.0119802	Metabolism	Glycan biosynthesis and metabolism	00510 N-Glycan biosynthesis [PATH:ko00510]	2
E2.3.1.158; phospholipid:diacylglycerol acyltransferase [EC:2.3.1.158]	-0.866667	0.0119802	Metabolism	Lipid metabolism	00561 Glycerolipid metabolism [PATH:ko00561]	2
PLA2G, SPLA2; secretory phospholipase A2 [EC:3.1.1.4]	-0.866667	0.0119802	Metabolism	Lipid metabolism	00564 Glycerophospholipid metabolism [PATH:ko00564]	2
MET1; uroporphyrin-III C-methyltransferase [EC:2.1.1.107]	-0.866667	0.0119802	Metabolism	Metabolism of cofactors and vitamins	00860 Porphyrin and chlorophyll metabolism [PATH:ko00860]	2
DHDDS, RER2, SRT1; ditrans,polycis-polyprenyl diphosphate synthase [EC:2.5.1.87]	-0.866667	0.0119802	Metabolism	Metabolism of terpenoids and polyketides	00900 Terpenoid backbone biosynthesis [PATH:ko00900]	2
CDC4; F-box and WD-40 domain protein CDC4	-0.85	0.0161686	Cellular Processes	Cell growth and death	04111 Cell cycle - yeast [PATH:ko04111]	2
SEC63; translocation protein SEC63	-0.85	0.0161686	Genetic Information Processing	Folding, sorting and degradation	03060 Protein export [PATH:ko03060]	2
UBQLN, DSK2; ubiquilin	-0.85	0.0161686	Genetic Information Processing	Folding, sorting and degradation	04141 Protein processing in endoplasmic reticulum [PATH:ko04141]	2
RAD52; DNA repair and recombination protein RAD52	-0.85	0.0161686	Genetic Information Processing	Replication and repair	03440 Homologous recombination [PATH:ko03440]	2
RP-S23e, RPS23; small subunit ribosomal protein S23e	-0.85	0.0161686	Genetic Information Processing	Translation	03010 Ribosome [PATH:ko03010]	2
EIF2S2; translation initiation factor 2 subunit 2	-0.85	0.0161686	Genetic Information Processing	Translation	03013 RNA transport [PATH:ko03013]	2
NUP188; nuclear pore complex protein Nup188	-0.85	0.0161686	Genetic Information Processing	Translation	03013 RNA transport [PATH:ko03013]	2
ARF6; ADP-ribosylation factor 6	-0.833333	0.020874	Cellular Processes	Transport and catabolism	04144 Endocytosis [PATH:ko04144]	2
CHMP1, VPS46, DID2; charged multivesicular body protein 1	-0.833333	0.020874	Cellular Processes	Transport and catabolism	04144 Endocytosis [PATH:ko04144]	2
PSMA1; 20S proteasome subunit alpha 6 [EC:3.4.25.1]	-0.833333	0.020874	Genetic Information Processing	Folding, sorting and degradation	03050 Proteasome [PATH:ko03050]	2
PSME4; proteasome activator subunit 4	-0.833333	0.020874	Genetic Information Processing	Folding, sorting and degradation	03050 Proteasome [PATH:ko03050]	2
DDB1; DNA damage-binding protein 1	-0.833333	0.020874	Genetic Information Processing	Folding, sorting and degradation	04120 Ubiquitin mediated proteolysis [PATH:ko04120]	2
UBE2S, E2EPF; ubiquitin-conjugating enzyme E2 S [EC:6.3.2.19]	-0.833333	0.020874	Genetic Information Processing	Folding, sorting and degradation	04120 Ubiquitin mediated proteolysis [PATH:ko04120]	2
HYOU1; hypoxia up-regulated 1	-0.833333	0.020874	Genetic Information Processing	Folding, sorting and degradation	04141 Protein processing in endoplasmic reticulum [PATH:ko04141]	2
RAD23, HR23; UV excision repair protein RAD23	-0.833333	0.020874	Genetic Information Processing	Folding, sorting and degradation	04141 Protein processing in endoplasmic reticulum [PATH:ko04141]	2
ISY1; pre-mRNA-splicing factor ISY1	-0.833333	0.020874	Genetic Information Processing	Transcription	03040 Spliceosome [PATH:ko03040]	2
PRPF31; U4/U6 small nuclear ribonucleoprotein PRP31	-0.833333	0.020874	Genetic Information Processing	Transcription	03040 Spliceosome [PATH:ko03040]	2
RBM17, SPF45; splicing factor 45	-0.833333	0.020874	Genetic Information Processing	Transcription	03040 Spliceosome [PATH:ko03040]	2
SR140; U2-associated protein SR140	-0.833333	0.020874	Genetic Information Processing	Transcription	03040 Spliceosome [PATH:ko03040]	2
THOC3; THO complex subunit 3	-0.833333	0.020874	Genetic Information Processing	Transcription	03040 Spliceosome [PATH:ko03040]	2
U2AF1; splicing factor U2AF 35 kDa subunit	-0.833333	0.020874	Genetic Information Processing	Transcription	03040 Spliceosome [PATH:ko03040]	2
RP-L14e, RPL14; large subunit ribosomal protein L14e	-0.833333	0.020874	Genetic Information Processing	Translation	03010 Ribosome [PATH:ko03010]	2
EIF3F; translation initiation factor 3 subunit F	-0.833333	0.020874	Genetic Information Processing	Translation	03013 RNA transport [PATH:ko03013]	2
EIF3H; translation initiation factor 3 subunit H	-0.833333	0.020874	Genetic Information Processing	Translation	03013 RNA transport [PATH:ko03013]	2
XPO5; exportin-5	-0.833333	0.020874	Genetic Information Processing	Translation	03013 RNA transport [PATH:ko03013]	2
CPSF2, CFT2; cleavage and polyadenylation specificity factor subunit 2	-0.833333	0.020874	Genetic Information Processing	Translation	03015 mRNA surveillance pathway [PATH:ko03015]	2
PIGT; phosphatidylinositol glycan, class T	-0.833333	0.020874	Metabolism	Glycan biosynthesis and metabolism	00563 Glycosylphosphatidylinositol(GPI)-anchor biosynthesis [PATH:ko00563]	2
BTA1; betaine lipid synthase	-0.833333	0.020874	Metabolism	Lipid metabolism	00564 Glycerophospholipid metabolism [PATH:ko00564]	2
CRLS; cardiolipin synthase [EC:2.7.8.-]	-0.833333	0.020874	Metabolism	Lipid metabolism	00564 Glycerophospholipid metabolism [PATH:ko00564]	2
TAZ; monolysocardiolipin acyltransferase [EC:2.3.1.-]	-0.833333	0.020874	Metabolism	Lipid metabolism	00564 Glycerophospholipid metabolism [PATH:ko00564]	2
YDC1; dihydroceramidase [EC:3.5.1.-]	-0.833333	0.020874	Metabolism	Lipid metabolism	00600 Sphingolipid metabolism [PATH:ko00600]	2
hexPS, COQ1; hexaprenyl-diphosphate synthase [EC:2.5.1.82 2.5.1.83]	-0.833333	0.020874	Metabolism	Metabolism of terpenoids and polyketides	00900 Terpenoid backbone biosynthesis [PATH:ko00900]	2
E3.2.1.15; polygalacturonase [EC:3.2.1.15]	-0.833333	0.020874	Metabolism	Carbohydrate metabolism	00040 Pentose and glucuronate interconversions [PATH:ko00040]	2
MET30; F-box and WD-40 domain protein MET30	-0.816667	0.0264014	Cellular Processes	Cell growth and death	04111 Cell cycle - yeast [PATH:ko04111]	2
CHMP2A; charged multivesicular body protein 2A	-0.816667	0.0264014	Cellular Processes	Transport and catabolism	04144 Endocytosis [PATH:ko04144]	2
PEX2, PXMP3; peroxin-2	-0.816667	0.0264014	Cellular Processes	Transport and catabolism	04146 Peroxisome [PATH:ko04146]	2
SLC25A17, PMP34; solute carrier family 25 (peroxisomal adenine nucleotide transporter), member 17	-0.816667	0.0264014	Cellular Processes	Transport and catabolism	04146 Peroxisome [PATH:ko04146]	2
ABCC4; ATP-binding cassette, subfamily C (CFTR/MRP), member 4	-0.816667	0.0264014	Environmental Information Processing	Membrane transport	02010 ABC transporters [PATH:ko02010]	2
BNI1; cytokinesis protein	-0.816667	0.0264014	Environmental Information Processing	Signal transduction	04011 MAPK signaling pathway - yeast [PATH:ko04011]	2
MKK1_2; mitogen-activated protein kinase kinase [EC:2.7.12.2]	-0.816667	0.0264014	Environmental Information Processing	Signal transduction	04011 MAPK signaling pathway - yeast [PATH:ko04011]	2
PSMA3; 20S proteasome subunit alpha 7 [EC:3.4.25.1]	-0.816667	0.0264014	Genetic Information Processing	Folding, sorting and degradation	03050 Proteasome [PATH:ko03050]	2
PSMB6; 20S proteasome subunit beta 1 [EC:3.4.25.1]	-0.816667	0.0264014	Genetic Information Processing	Folding, sorting and degradation	03050 Proteasome [PATH:ko03050]	2
SYVN1, HRD1; E3 ubiquitin-protein ligase synoviolin [EC:6.3.2.19]	-0.816667	0.0264014	Genetic Information Processing	Folding, sorting and degradation	04120 Ubiquitin mediated proteolysis [PATH:ko04120]	2
UBE2J2, NCUBE2, UBC6; ubiquitin-conjugating enzyme E2 J2 [EC:6.3.2.19]	-0.816667	0.0264014	Genetic Information Processing	Folding, sorting and degradation	04120 Ubiquitin mediated proteolysis [PATH:ko04120]	2
STX5; syntaxin 5	-0.816667	0.0264014	Genetic Information Processing	Folding, sorting and degradation	04130 SNARE interactions in vesicular transport [PATH:ko04130]	2
GCS1; mannosyl-oligosaccharide glucosidase [EC:3.2.1.106]	-0.816667	0.0264014	Genetic Information Processing	Folding, sorting and degradation	04141 Protein processing in endoplasmic reticulum [PATH:ko04141]	2
POLE2; DNA polymerase epsilon subunit 2 [EC:2.7.7.7]	-0.816667	0.0264014	Genetic Information Processing	Replication and repair	03030 DNA replication [PATH:ko03030]	2
MLH1; DNA mismatch repair protein MLH1	-0.816667	0.0264014	Genetic Information Processing	Replication and repair	03430 Mismatch repair [PATH:ko03430]	2
RPC40, POLR1C; DNA-directed RNA polymerases I and III subunit RPAC1	-0.816667	0.0264014	Genetic Information Processing	Transcription	03020 RNA polymerase [PATH:ko03020]	2
TAF7; transcription initiation factor TFIID subunit 7	-0.816667	0.0264014	Genetic Information Processing	Transcription	03022 Basal transcription factors [PATH:ko03022]	2
RP-L31e, RPL31; large subunit ribosomal protein L31e	-0.816667	0.0264014	Genetic Information Processing	Translation	03010 Ribosome [PATH:ko03010]	2
RP-S15e, RPS15; small subunit ribosomal protein S15e	-0.816667	0.0264014	Genetic Information Processing	Translation	03010 Ribosome [PATH:ko03010]	2
EIF2B2; translation initiation factor eIF-2B subunit beta	-0.816667	0.0264014	Genetic Information Processing	Translation	03013 RNA transport [PATH:ko03013]	2
CSTF3, RNA14; cleavage stimulation factor subunit 3	-0.816667	0.0264014	Genetic Information Processing	Translation	03015 mRNA surveillance pathway [PATH:ko03015]	2
NUDT21, CPSF5, CFIM25; cleavage and polyadenylation specificity factor subunit 5	-0.816667	0.0264014	Genetic Information Processing	Translation	03015 mRNA surveillance pathway [PATH:ko03015]	2
PCF11; pre-mRNA cleavage complex 2 protein Pcf11	-0.816667	0.0264014	Genetic Information Processing	Translation	03015 mRNA surveillance pathway [PATH:ko03015]	2
E2.3.1.4, GNA1; glucosamine-phosphate N-acetyltransferase [EC:2.3.1.4]	-0.816667	0.0264014	Metabolism	Carbohydrate metabolism	00520 Amino sugar and nucleotide sugar metabolism [PATH:ko00520]	2
ALG10; alpha-1,2-glucosyltransferase [EC:2.4.1.256]	-0.816667	0.0264014	Metabolism	Glycan biosynthesis and metabolism	00510 N-Glycan biosynthesis [PATH:ko00510]	2
MNN10; mannan polymerase II complex MNN10 subunit [EC:2.4.1.-]	-0.816667	0.0264014	Metabolism	Glycan biosynthesis and metabolism	00513 Various types of N-glycan biosynthesis [PATH:ko00513]	2
LPT1, ALE1; lysophospholipid acyltransferase [EC:2.3.1.51 2.3.1.23 2.3.1.-]	-0.816667	0.0264014	Metabolism	Lipid metabolism	00561 Glycerolipid metabolism [PATH:ko00561]	2
HLCS; biotin--protein ligase [EC:6.3.4.9 6.3.4.10 6.3.4.11 6.3.4.15]	-0.816667	0.0264014	Metabolism	Metabolism of cofactors and vitamins	00780 Biotin metabolism [PATH:ko00780]	2
MOB1, Mats; MOB kinase activator 1	-0.8	0.0326626	Cellular Processes	Cell growth and death	04111 Cell cycle - yeast [PATH:ko04111]	2
SMAP; stromal membrane-associated protein	-0.8	0.0326626	Cellular Processes	Transport and catabolism	04144 Endocytosis [PATH:ko04144]	2
VPS36, EAP45; ESCRT-II complex subunit VPS36	-0.8	0.0326626	Cellular Processes	Transport and catabolism	04144 Endocytosis [PATH:ko04144]	2
CNOT2, NOT2; CCR4-NOT transcription complex subunit 2	-0.8	0.0326626	Genetic Information Processing	Folding, sorting and degradation	03018 RNA degradation [PATH:ko03018]	2
PAN3; PAB-dependent poly(A)-specific ribonuclease subunit 3	-0.8	0.0326626	Genetic Information Processing	Folding, sorting and degradation	03018 RNA degradation [PATH:ko03018]	2
PSMA6; 20S proteasome subunit alpha 1 [EC:3.4.25.1]	-0.8	0.0326626	Genetic Information Processing	Folding, sorting and degradation	03050 Proteasome [PATH:ko03050]	2
PSMA7; 20S proteasome subunit alpha 4 [EC:3.4.25.1]	-0.8	0.0326626	Genetic Information Processing	Folding, sorting and degradation	03050 Proteasome [PATH:ko03050]	2
PRPF19, PRP19; pre-mRNA-processing factor 19 [EC:6.3.2.19]	-0.8	0.0326626	Genetic Information Processing	Folding, sorting and degradation	04120 Ubiquitin mediated proteolysis [PATH:ko04120]	2
STX1B_2_3; syntaxin 1B/2/3	-0.8	0.0326626	Genetic Information Processing	Folding, sorting and degradation	04130 SNARE interactions in vesicular transport [PATH:ko04130]	2
DNAJB12; DnaJ homolog subfamily B member 12	-0.8	0.0326626	Genetic Information Processing	Folding, sorting and degradation	04141 Protein processing in endoplasmic reticulum [PATH:ko04141]	2
EXO1; exonuclease 1 [EC:3.1.-.-]	-0.8	0.0326626	Genetic Information Processing	Replication and repair	03430 Mismatch repair [PATH:ko03430]	2
XRCC6, KU70, G22P1; ATP-dependent DNA helicase 2 subunit 1	-0.8	0.0326626	Genetic Information Processing	Replication and repair	03450 Non-homologous end-joining [PATH:ko03450]	2
RPB7, POLR2G; DNA-directed RNA polymerase II subunit RPB7	-0.8	0.0326626	Genetic Information Processing	Transcription	03020 RNA polymerase [PATH:ko03020]	2
TFIIF1, GTF2F1, TFG1; transcription initiation factor TFIIF subunit alpha	-0.8	0.0326626	Genetic Information Processing	Transcription	03022 Basal transcription factors [PATH:ko03022]	2
SNRPB, SMB; small nuclear ribonucleoprotein B and B'	-0.8	0.0326626	Genetic Information Processing	Transcription	03040 Spliceosome [PATH:ko03040]	2
SNRPD1, SMD1; small nuclear ribonucleoprotein D1	-0.8	0.0326626	Genetic Information Processing	Transcription	03040 Spliceosome [PATH:ko03040]	2
RP-L19e, RPL19; large subunit ribosomal protein L19e	-0.8	0.0326626	Genetic Information Processing	Translation	03010 Ribosome [PATH:ko03010]	2
NUP133; nuclear pore complex protein Nup133	-0.8	0.0326626	Genetic Information Processing	Translation	03013 RNA transport [PATH:ko03013]	2
NUP98, ADAR2; nuclear pore complex protein Nup98-Nup96	-0.8	0.0326626	Genetic Information Processing	Translation	03013 RNA transport [PATH:ko03013]	2
BNA3; kynurenine aminotransferase [EC:2.6.1.7]	-0.8	0.0326626	Metabolism	Amino acid metabolism	00380 Tryptophan metabolism [PATH:ko00380]	2
ALG1; beta-1,4-mannosyltransferase [EC:2.4.1.142]	-0.8	0.0326626	Metabolism	Glycan biosynthesis and metabolism	00510 N-Glycan biosynthesis [PATH:ko00510]	2
KTR1_3; alpha 1,2-mannosyltransferase [EC:2.4.1.-]	-0.8	0.0326626	Metabolism	Glycan biosynthesis and metabolism	00514 Other types of O-glycan biosynthesis [PATH:ko00514]	2
PIGM; phosphatidylinositol glycan, class M [EC:2.4.1.-]	-0.8	0.0326626	Metabolism	Glycan biosynthesis and metabolism	00563 Glycosylphosphatidylinositol(GPI)-anchor biosynthesis [PATH:ko00563]	2
PIGW; phosphatidylinositol glycan, class W [EC:2.3.-.-]	-0.8	0.0326626	Metabolism	Glycan biosynthesis and metabolism	00563 Glycosylphosphatidylinositol(GPI)-anchor biosynthesis [PATH:ko00563]	2
PHS1, PAS2; very-long-chain (3R)-3-hydroxyacyl-[acyl-carrier protein] dehydratase [EC:4.2.1.134]	-0.8	0.0326626	Metabolism	Lipid metabolism	00062 Fatty acid elongation [PATH:ko00062]	2
TUP1; glucose repression regulatory protein TUP1	-0.783333	0.0397463	Cellular Processes	Cell growth and death	04111 Cell cycle - yeast [PATH:ko04111]	2
CHMP4, SNF7, VPS32; charged multivesicular body protein 4	-0.783333	0.0397463	Cellular Processes	Transport and catabolism	04144 Endocytosis [PATH:ko04144]	2
PEX7, PTS2R; peroxin-7	-0.783333	0.0397463	Cellular Processes	Transport and catabolism	04146 Peroxisome [PATH:ko04146]	2
POLS, TRF4; DNA polymerase sigma [EC:2.7.7.7]	-0.783333	0.0397463	Genetic Information Processing	Folding, sorting and degradation	03018 RNA degradation [PATH:ko03018]	2
RCD1, CNOT9, CAF40; CCR4-NOT transcription complex subunit 9	-0.783333	0.0397463	Genetic Information Processing	Folding, sorting and degradation	03018 RNA degradation [PATH:ko03018]	2
SEC62; translocation protein SEC62	-0.783333	0.0397463	Genetic Information Processing	Folding, sorting and degradation	03060 Protein export [PATH:ko03060]	2
UBLE1A, SAE1; ubiquitin-like 1-activating enzyme E1 A [EC:6.3.2.19]	-0.783333	0.0397463	Genetic Information Processing	Folding, sorting and degradation	04120 Ubiquitin mediated proteolysis [PATH:ko04120]	2
LIG4, DNL4; DNA ligase 4 [EC:6.5.1.1]	-0.783333	0.0397463	Genetic Information Processing	Replication and repair	03450 Non-homologous end-joining [PATH:ko03450]	2
EIF5; translation initiation factor 5	-0.783333	0.0397463	Genetic Information Processing	Translation	03013 RNA transport [PATH:ko03013]	2
XPOT; exportin-T	-0.783333	0.0397463	Genetic Information Processing	Translation	03013 RNA transport [PATH:ko03013]	2
ALG3; alpha-1,3-mannosyltransferase [EC:2.4.1.258]	-0.783333	0.0397463	Metabolism	Glycan biosynthesis and metabolism	00510 N-Glycan biosynthesis [PATH:ko00510]	2
PIGU; phosphatidylinositol glycan, class U	-0.783333	0.0397463	Metabolism	Glycan biosynthesis and metabolism	00563 Glycosylphosphatidylinositol(GPI)-anchor biosynthesis [PATH:ko00563]	2
ERG4; delta24(24(1))-sterol reductase [EC:1.3.1.71]	-0.783333	0.0397463	Metabolism	Lipid metabolism	00100 Steroid biosynthesis [PATH:ko00100]	2
EPT1; ethanolaminephosphotransferase [EC:2.7.8.1]	-0.783333	0.0397463	Metabolism	Lipid metabolism	00564 Glycerophospholipid metabolism [PATH:ko00564]	2
PRMT5, HSL7; protein arginine N-methyltransferase 5 [EC:2.1.1.125]	-0.766667	0.0476383	Cellular Processes	Cell growth and death	04111 Cell cycle - yeast [PATH:ko04111]	2
SWE1; mitosis inhibitor protein kinase SWE1 [EC:2.7.11.1]	-0.766667	0.0476383	Cellular Processes	Cell growth and death	04111 Cell cycle - yeast [PATH:ko04111]	2
SPO11; meiotic recombination protein SPO11	-0.766667	0.0476383	Cellular Processes	Cell growth and death	04113 Meiosis - yeast [PATH:ko04113]	2
AP2S1; AP-2 complex subunit sigma-1	-0.766667	0.0476383	Cellular Processes	Transport and catabolism	04144 Endocytosis [PATH:ko04144]	2
STAMBP, AMSH; STAM-binding protein [EC:3.1.2.15]	-0.766667	0.0476383	Cellular Processes	Transport and catabolism	04144 Endocytosis [PATH:ko04144]	2
ATPeVE, ATP6E; V-type H+-transporting ATPase subunit E [EC:3.6.3.14]	-0.766667	0.0476383	Cellular Processes	Transport and catabolism	04145 Phagosome [PATH:ko04145]	2
DYNC1I, DNCI; dynein intermediate chain, cytosolic	-0.766667	0.0476383	Cellular Processes	Transport and catabolism	04145 Phagosome [PATH:ko04145]	2
CNOT3, NOT3; CCR4-NOT transcription complex subunit 3	-0.766667	0.0476383	Genetic Information Processing	Folding, sorting and degradation	03018 RNA degradation [PATH:ko03018]	2
DCP2; mRNA-decapping enzyme subunit 2 [EC:3.-.-.-]	-0.766667	0.0476383	Genetic Information Processing	Folding, sorting and degradation	03018 RNA degradation [PATH:ko03018]	2
LSM8; U6 snRNA-associated Sm-like protein LSm8	-0.766667	0.0476383	Genetic Information Processing	Folding, sorting and degradation	03018 RNA degradation [PATH:ko03018]	2
PSMD12, RPN5; 26S proteasome regulatory subunit N5	-0.766667	0.0476383	Genetic Information Processing	Folding, sorting and degradation	03050 Proteasome [PATH:ko03050]	2
PSMD8, RPN12; 26S proteasome regulatory subunit N12	-0.766667	0.0476383	Genetic Information Processing	Folding, sorting and degradation	03050 Proteasome [PATH:ko03050]	2
UBE2N, BLU, UBC13; ubiquitin-conjugating enzyme E2 N [EC:6.3.2.19]	-0.766667	0.0476383	Genetic Information Processing	Folding, sorting and degradation	04120 Ubiquitin mediated proteolysis [PATH:ko04120]	2
DNAJC3; DnaJ homolog subfamily C member 3	-0.766667	0.0476383	Genetic Information Processing	Folding, sorting and degradation	04141 Protein processing in endoplasmic reticulum [PATH:ko04141]	2
PDIA6, TXNDC7; protein disulfide-isomerase A6 [EC:5.3.4.1]	-0.766667	0.0476383	Genetic Information Processing	Folding, sorting and degradation	04141 Protein processing in endoplasmic reticulum [PATH:ko04141]	2
TAF6; transcription initiation factor TFIID subunit 6	-0.766667	0.0476383	Genetic Information Processing	Transcription	03022 Basal transcription factors [PATH:ko03022]	2
CTNNBL1; beta-catenin-like protein 1	-0.766667	0.0476383	Genetic Information Processing	Transcription	03040 Spliceosome [PATH:ko03040]	2
PRPF18, PRP18; pre-mRNA-splicing factor 18	-0.766667	0.0476383	Genetic Information Processing	Transcription	03040 Spliceosome [PATH:ko03040]	2
SART1, HAF, SNU66; U4/U6.U5 tri-snRNP-associated protein 1	-0.766667	0.0476383	Genetic Information Processing	Transcription	03040 Spliceosome [PATH:ko03040]	2
RP-S7e, RPS7; small subunit ribosomal protein S7e	-0.766667	0.0476383	Genetic Information Processing	Translation	03010 Ribosome [PATH:ko03010]	2
EIF2B5; translation initiation factor eIF-2B subunit epsilon	-0.766667	0.0476383	Genetic Information Processing	Translation	03013 RNA transport [PATH:ko03013]	2
NUP205; nuclear pore complex protein Nup205	-0.766667	0.0476383	Genetic Information Processing	Translation	03013 RNA transport [PATH:ko03013]	2
CLP1, HERB; polyribonucleotide 5'-hydroxyl-kinase [EC:2.7.1.78]	-0.766667	0.0476383	Genetic Information Processing	Translation	03015 mRNA surveillance pathway [PATH:ko03015]	2
PABPN1, PABP2; polyadenylate-binding protein 2	-0.766667	0.0476383	Genetic Information Processing	Translation	03015 mRNA surveillance pathway [PATH:ko03015]	2
GOT1; aspartate aminotransferase, cytoplasmic [EC:2.6.1.1]	-0.766667	0.0476383	Metabolism	Amino acid metabolism	00250 Alanine, aspartate and glutamate metabolism [PATH:ko00250]	2
ALG12; alpha-1,6-mannosyltransferase [EC:2.4.1.260]	-0.766667	0.0476383	Metabolism	Glycan biosynthesis and metabolism	00510 N-Glycan biosynthesis [PATH:ko00510]	2
LPAAT, AGPAT1, AGPAT2; lysophosphatidate acyltransferase [EC:2.3.1.51]	-0.766667	0.0476383	Metabolism	Lipid metabolism	00561 Glycerolipid metabolism [PATH:ko00561]	2
ITPA; inosine triphosphate pyrophosphatase [EC:3.6.1.19]	-0.766667	0.0476383	Metabolism	Nucleotide metabolism	00230 Purine metabolism [PATH:ko00230]	2
E3.2.1.86B, bglA; 6-phospho-beta-glucosidase [EC:3.2.1.86]	-0.983333	5.01129e-05	Metabolism	Carbohydrate metabolism	00010 Glycolysis / Gluconeogenesis [PATH:ko00010]	3
treC; trehalose-6-phosphate hydrolase [EC:3.2.1.93]	-0.95	0.00101982	Metabolism	Carbohydrate metabolism	00500 Starch and sucrose metabolism [PATH:ko00500]	3
ETNK, EKI; ethanolamine kinase [EC:2.7.1.82]	-0.933333	0.0020874	Metabolism	Lipid metabolism	00564 Glycerophospholipid metabolism [PATH:ko00564]	3
PTS-Cel-EIIC, celB; PTS system, cellobiose-specific IIC component	-0.916667	0.00363313	Environmental Information Processing	Membrane transport	02060 Phosphotransferase system (PTS) [PATH:ko02060]	3
APEX1; AP endonuclease 1 [EC:4.2.99.18]	-0.916667	0.00363313	Genetic Information Processing	Replication and repair	03410 Base excision repair [PATH:ko03410]	3
ectA; L-2,4-diaminobutyric acid acetyltransferase [EC:2.3.1.178]	-0.916667	0.00363313	Metabolism	Amino acid metabolism	00260 Glycine, serine and threonine metabolism [PATH:ko00260]	3
E4.1.1.3B, oadB; oxaloacetate decarboxylase, beta subunit [EC:4.1.1.3]	-0.9	0.00585222	Metabolism	Amino acid metabolism	00330 Arginine and proline metabolism [PATH:ko00330]	3
nspC; carboxynorspermidine decarboxylase [EC:4.1.1.-]	-0.9	0.00585222	Metabolism	Amino acid metabolism	00330 Arginine and proline metabolism [PATH:ko00330]	3
phnA; phosphonoacetate hydrolase [EC:3.11.1.2]	-0.9	0.00585222	Metabolism	Metabolism of other amino acids	00440 Phosphonate and phosphinate metabolism [PATH:ko00440]	3
tagH; teichoic acid transport system ATP-binding protein [EC:3.6.3.40]	-0.883333	0.00864959	Environmental Information Processing	Membrane transport	02010 ABC transporters [PATH:ko02010]	3
thiI; thiamine biosynthesis protein ThiI	-0.883333	0.00864959	Genetic Information Processing	Folding, sorting and degradation	04122 Sulfur relay system [PATH:ko04122]	3
DPO3A2, polC; DNA polymerase III subunit alpha, Gram-positive type [EC:2.7.7.7]	-0.883333	0.00864959	Genetic Information Processing	Replication and repair	03030 DNA replication [PATH:ko03030]	3
patA; aminotransferase [EC:2.6.1.-]	-0.883333	0.00864959	Metabolism	Amino acid metabolism	00300 Lysine biosynthesis [PATH:ko00300]	3
nhaC; Na+:H+ antiporter, NhaC family	-0.883333	0.00864959	Metabolism	Energy metabolism	00680 Methane metabolism [PATH:ko00680]	3
pbpB; penicillin-binding protein 2B	-0.883333	0.00864959	Metabolism	Glycan biosynthesis and metabolism	00550 Peptidoglycan biosynthesis [PATH:ko00550]	3
DGUOK; deoxyguanosine kinase [EC:2.7.1.113]	-0.883333	0.00864959	Metabolism	Nucleotide metabolism	00230 Purine metabolism [PATH:ko00230]	3
PTS-Bgl-EIIA, bglF; PTS system, beta-glucosides-specific IIA component [EC:2.7.1.69]	-0.866667	0.0119802	Environmental Information Processing	Membrane transport	02060 Phosphotransferase system (PTS) [PATH:ko02060]	3
crtN; 4,4'-diapophytoene desaturase [EC:1.3.8.2]	-0.866667	0.0119802	Metabolism	Metabolism of terpenoids and polyketides	00906 Carotenoid biosynthesis [PATH:ko00906]	3
spo0A; two-component system, response regulator, stage 0 sporulation protein A	-0.866667	0.0119802	Environmental Information Processing	Signal transduction	02020 Two-component system [PATH:ko02020]	3
ABAT; 4-aminobutyrate aminotransferase / (S)-3-amino-2-methylpropionate transaminase [EC:2.6.1.19 2.6.1.22]	-0.85	0.0161686	Metabolism	Amino acid metabolism	00250 Alanine, aspartate and glutamate metabolism [PATH:ko00250]	3
asnA; aspartate--ammonia ligase [EC:6.3.1.1]	-0.85	0.0161686	Metabolism	Amino acid metabolism	00250 Alanine, aspartate and glutamate metabolism [PATH:ko00250]	3
mtnN, mtn, pfs; S-adenosylhomocysteine/5'-methylthioadenosine nucleosidase [EC:3.2.2.9]	-0.85	0.0161686	Metabolism	Amino acid metabolism	00270 Cysteine and methionine metabolism [PATH:ko00270]	3
pbp; penicillin-binding protein	-0.85	0.0161686	Metabolism	Glycan biosynthesis and metabolism	00550 Peptidoglycan biosynthesis [PATH:ko00550]	3
folKP; 2-amino-4-hydroxy-6-hydroxymethyldihydropteridine diphosphokinase / dihydropteroate synthase [EC:2.7.6.3 2.5.1.15]	-0.85	0.0161686	Metabolism	Metabolism of cofactors and vitamins	00790 Folate biosynthesis [PATH:ko00790]	3
K01270, pepD; dipeptidase D [EC:3.4.13.-]	-0.85	0.0161686	Metabolism	Metabolism of other amino acids	00480 Glutathione metabolism [PATH:ko00480]	3
xpt; xanthine phosphoribosyltransferase [EC:2.4.2.22]	-0.85	0.0161686	Metabolism	Nucleotide metabolism	00230 Purine metabolism [PATH:ko00230]	3
PTS-Man-EIIB, manX; PTS system, mannose-specific IIB component [EC:2.7.1.69]	-0.833333	0.020874	Environmental Information Processing	Membrane transport	02060 Phosphotransferase system (PTS) [PATH:ko02060]	3
fadB; 3-hydroxyacyl-CoA dehydrogenase / enoyl-CoA hydratase / 3-hydroxybutyryl-CoA epimerase / enoyl-CoA isomerase [EC:1.1.1.35 4.2.1.17 5.1.2.3 5.3.3.8]	-0.833333	0.020874	Metabolism	Amino acid metabolism	00280 Valine, leucine and isoleucine degradation [PATH:ko00280]	3
aroD; 3-dehydroquinate dehydratase I [EC:4.2.1.10]	-0.833333	0.020874	Metabolism	Amino acid metabolism	00400 Phenylalanine, tyrosine and tryptophan biosynthesis [PATH:ko00400]	3
E4.1.3.3, nanA, NPL; N-acetylneuraminate lyase [EC:4.1.3.3]	-0.833333	0.020874	Metabolism	Carbohydrate metabolism	00520 Amino sugar and nucleotide sugar metabolism [PATH:ko00520]	3
E1.3.1.-; [EC:1.3.1.-]	-0.833333	0.020874	Metabolism	Carbohydrate metabolism	00640 Propanoate metabolism [PATH:ko00640]	3
SLN1; osomolarity two-component system, sensor histidine kinase SLN1 [EC:2.7.13.3]	-0.833333	0.020874	Environmental Information Processing	Signal transduction	02020 Two-component system [PATH:ko02020]	3
HACL1; 2-hydroxyacyl-CoA lyase 1 [EC:4.1.-.-]	-0.816667	0.0264014	Cellular Processes	Transport and catabolism	04146 Peroxisome [PATH:ko04146]	3
bceA; bacitracin transport system ATP-binding protein	-0.816667	0.0264014	Environmental Information Processing	Membrane transport	02010 ABC transporters [PATH:ko02010]	3
pbp2A; penicillin-binding protein 2A [EC:2.4.1.129 2.3.2.-]	-0.816667	0.0264014	Metabolism	Glycan biosynthesis and metabolism	00550 Peptidoglycan biosynthesis [PATH:ko00550]	3
nrdD; ribonucleoside-triphosphate reductase [EC:1.17.4.2]	-0.816667	0.0264014	Metabolism	Nucleotide metabolism	00230 Purine metabolism [PATH:ko00230]	3
PTS-Man-EIIC, manY; PTS system, mannose-specific IIC component	-0.8	0.0326626	Environmental Information Processing	Membrane transport	02060 Phosphotransferase system (PTS) [PATH:ko02060]	3
HADHA; enoyl-CoA hydratase / long-chain 3-hydroxyacyl-CoA dehydrogenase [EC:4.2.1.17 1.1.1.211]	-0.8	0.0326626	Metabolism	Amino acid metabolism	00280 Valine, leucine and isoleucine degradation [PATH:ko00280]	3
astE; succinylglutamate desuccinylase [EC:3.5.1.96]	-0.8	0.0326626	Metabolism	Amino acid metabolism	00330 Arginine and proline metabolism [PATH:ko00330]	3
fucO; lactaldehyde reductase [EC:1.1.1.77]	-0.8	0.0326626	Metabolism	Carbohydrate metabolism	00620 Pyruvate metabolism [PATH:ko00620]	3
E5.4.99.1; methylaspartate mutase [EC:5.4.99.1]	-0.8	0.0326626	Metabolism	Carbohydrate metabolism	00660 C5-Branched dibasic acid metabolism [PATH:ko00660]	3
ABCB10; ATP-binding cassette, subfamily B (MDR/TAP), member 10	-0.783333	0.0397463	Environmental Information Processing	Membrane transport	02010 ABC transporters [PATH:ko02010]	3
narH; nitrate reductase 1, beta subunit [EC:1.7.99.4]	-0.783333	0.0397463	Environmental Information Processing	Signal transduction	02020 Two-component system [PATH:ko02020]	3
hdrA; heterodisulfide reductase subunit A [EC:1.8.98.1]	-0.783333	0.0397463	Metabolism	Energy metabolism	00680 Methane metabolism [PATH:ko00680]	3
hdrC; heterodisulfide reductase subunit C [EC:1.8.98.1]	-0.783333	0.0397463	Metabolism	Energy metabolism	00680 Methane metabolism [PATH:ko00680]	3
fas; fatty acid synthase, bacteria type [EC:2.3.1.-]	-0.783333	0.0397463	Metabolism	Lipid metabolism	00061 Fatty acid biosynthesis [PATH:ko00061]	3
E1.7.1.7, guaC; GMP reductase [EC:1.7.1.7]	-0.783333	0.0397463	Metabolism	Nucleotide metabolism	00230 Purine metabolism [PATH:ko00230]	3
dcuB; anaerobic C4-dicarboxylate transporter DcuB	-0.783333	0.0397463	Environmental Information Processing	Signal transduction	02020 Two-component system [PATH:ko02020]	3
rstB; two-component system, OmpR family, sensor histidine kinase RstB [EC:2.7.13.3]	-0.783333	0.0397463	Environmental Information Processing	Signal transduction	02020 Two-component system [PATH:ko02020]	3
ectC; L-ectoine synthase [EC:4.2.1.108]	-0.766667	0.0476383	Metabolism	Amino acid metabolism	00260 Glycine, serine and threonine metabolism [PATH:ko00260]	3
lysAC; bifunctional diaminopimelate decarboxylase / aspartate kinase [EC:4.1.1.20 2.7.2.4]	-0.766667	0.0476383	Metabolism	Amino acid metabolism	00260 Glycine, serine and threonine metabolism [PATH:ko00260]	3
metA; homoserine O-succinyltransferase [EC:2.3.1.46]	-0.766667	0.0476383	Metabolism	Amino acid metabolism	00270 Cysteine and methionine metabolism [PATH:ko00270]	3
ATPVK, ntpK; V-type H+-transporting ATPase subunit K [EC:3.6.3.14]	-0.766667	0.0476383	Metabolism	Energy metabolism	00190 Oxidative phosphorylation [PATH:ko00190]	3
pdxB; erythronate-4-phosphate dehydrogenase [EC:1.1.1.290]	-0.766667	0.0476383	Metabolism	Metabolism of cofactors and vitamins	00750 Vitamin B6 metabolism [PATH:ko00750]	3
nosZ; nitrous-oxide reductase [EC:1.7.2.4]	-0.766667	0.0476383	Metabolism	Energy metabolism	00910 Nitrogen metabolism [PATH:ko00910]	3
GCLC; glutamate--cysteine ligase catalytic subunit [EC:6.3.2.2]	-0.966667	0.000334462	Metabolism	Metabolism of other amino acids	00480 Glutathione metabolism [PATH:ko00480]	4
PEX1; peroxin-1	-0.95	0.00101982	Cellular Processes	Transport and catabolism	04146 Peroxisome [PATH:ko04146]	4
CNOT1, NOT1; CCR4-NOT transcription complex subunit 1	-0.95	0.00101982	Genetic Information Processing	Folding, sorting and degradation	03018 RNA degradation [PATH:ko03018]	4
SEC24; protein transport protein SEC24	-0.95	0.00101982	Genetic Information Processing	Folding, sorting and degradation	04141 Protein processing in endoplasmic reticulum [PATH:ko04141]	4
RP-L4e, RPL4; large subunit ribosomal protein L4e	-0.95	0.00101982	Genetic Information Processing	Translation	03010 Ribosome [PATH:ko03010]	4
E2.7.1.105, PFK; 6-phosphofructo-2-kinase [EC:2.7.1.105]	-0.95	0.00101982	Metabolism	Carbohydrate metabolism	00051 Fructose and mannose metabolism [PATH:ko00051]	4
E2.1.1.41, SMT1, ERG6; sterol 24-C-methyltransferase [EC:2.1.1.41]	-0.95	0.00101982	Metabolism	Lipid metabolism	00100 Steroid biosynthesis [PATH:ko00100]	4
DDX6, RCK, DHH1; ATP-dependent RNA helicase DDX6/DHH1 [EC:3.6.4.13]	-0.933333	0.0020874	Genetic Information Processing	Folding, sorting and degradation	03018 RNA degradation [PATH:ko03018]	4
PSMC5, RPT6; 26S proteasome regulatory subunit T6	-0.933333	0.0020874	Genetic Information Processing	Folding, sorting and degradation	03050 Proteasome [PATH:ko03050]	4
DHX8, PRP22; ATP-dependent RNA helicase DHX8/PRP22 [EC:3.6.4.13]	-0.933333	0.0020874	Genetic Information Processing	Transcription	03040 Spliceosome [PATH:ko03040]	4
KPNB1; importin subunit beta-1	-0.933333	0.0020874	Genetic Information Processing	Translation	03013 RNA transport [PATH:ko03013]	4
ERF3, GSPT; peptide chain release factor subunit 3	-0.933333	0.0020874	Genetic Information Processing	Translation	03015 mRNA surveillance pathway [PATH:ko03015]	4
LYS4; homoaconitate hydratase [EC:4.2.1.36]	-0.933333	0.0020874	Metabolism	Amino acid metabolism	00300 Lysine biosynthesis [PATH:ko00300]	4
E5.4.99.7, LSS, ERG7; lanosterol synthase [EC:5.4.99.7]	-0.933333	0.0020874	Metabolism	Lipid metabolism	00100 Steroid biosynthesis [PATH:ko00100]	4
GAT; glycerol-3-phosphate O-acyltransferase / dihydroxyacetone phosphate acyltransferase [EC:2.3.1.15 2.3.1.42]	-0.933333	0.0020874	Metabolism	Lipid metabolism	00561 Glycerolipid metabolism [PATH:ko00561]	4
coaW; type II pantothenate kinase [EC:2.7.1.33]	-0.933333	0.0020874	Metabolism	Metabolism of cofactors and vitamins	00770 Pantothenate and CoA biosynthesis [PATH:ko00770]	4
NEDD4, RSP5; E3 ubiquitin-protein ligase NEDD4 [EC:6.3.2.19]	-0.916667	0.00363313	Cellular Processes	Transport and catabolism	04144 Endocytosis [PATH:ko04144]	4
XDH; xanthine dehydrogenase/oxidase [EC:1.17.1.4 1.17.3.2]	-0.916667	0.00363313	Cellular Processes	Transport and catabolism	04146 Peroxisome [PATH:ko04146]	4
ABC.ATM; mitochondrial ABC transporter ATM	-0.916667	0.00363313	Environmental Information Processing	Membrane transport	02010 ABC transporters [PATH:ko02010]	4
ABCB1; ATP-binding cassette, subfamily B (MDR/TAP), member 1	-0.916667	0.00363313	Environmental Information Processing	Membrane transport	02010 ABC transporters [PATH:ko02010]	4
EIF2AK3; eukaryotic translation initiation factor 2-alpha kinase 3 [EC:2.7.11.1]	-0.916667	0.00363313	Genetic Information Processing	Folding, sorting and degradation	04141 Protein processing in endoplasmic reticulum [PATH:ko04141]	4
POLA1; DNA polymerase alpha subunit A [EC:2.7.7.7]	-0.916667	0.00363313	Genetic Information Processing	Replication and repair	03030 DNA replication [PATH:ko03030]	4
POLE1; DNA polymerase epsilon subunit 1 [EC:2.7.7.7]	-0.916667	0.00363313	Genetic Information Processing	Replication and repair	03030 DNA replication [PATH:ko03030]	4
RFC2_4; replication factor C subunit 2/4	-0.916667	0.00363313	Genetic Information Processing	Replication and repair	03030 DNA replication [PATH:ko03030]	4
RFC3_5; replication factor C subunit 3/5	-0.916667	0.00363313	Genetic Information Processing	Replication and repair	03030 DNA replication [PATH:ko03030]	4
BLM, RECQL3, SGS1; bloom syndrome protein [EC:3.6.4.12]	-0.916667	0.00363313	Genetic Information Processing	Replication and repair	03440 Homologous recombination [PATH:ko03440]	4
EFTUD2; 116 kDa U5 small nuclear ribonucleoprotein component	-0.916667	0.00363313	Genetic Information Processing	Transcription	03040 Spliceosome [PATH:ko03040]	4
MTHFD; methylenetetrahydrofolate dehydrogenase (NADP+) / methenyltetrahydrofolate cyclohydrolase / formyltetrahydrofolate synthetase [EC:1.5.1.5 3.5.4.9 6.3.4.3]	-0.916667	0.00363313	Metabolism	Metabolism of cofactors and vitamins	00670 One carbon pool by folate [PATH:ko00670]	4
E6.3.2.17; folylpolyglutamate synthase [EC:6.3.2.17]	-0.916667	0.00363313	Metabolism	Metabolism of cofactors and vitamins	00790 Folate biosynthesis [PATH:ko00790]	4
YCS4, CNAP1, CAPD2; condensin complex subunit 1	-0.9	0.00585222	Cellular Processes	Cell growth and death	04111 Cell cycle - yeast [PATH:ko04111]	4
PAN2; PAB-dependent poly(A)-specific ribonuclease subunit 2 [EC:3.1.13.4]	-0.9	0.00585222	Genetic Information Processing	Folding, sorting and degradation	03018 RNA degradation [PATH:ko03018]	4
HUWE1, MULE, ARF-BP1; E3 ubiquitin-protein ligase HUWE1 [EC:6.3.2.19]	-0.9	0.00585222	Genetic Information Processing	Folding, sorting and degradation	04120 Ubiquitin mediated proteolysis [PATH:ko04120]	4
POLD1; DNA polymerase delta subunit 1 [EC:2.7.7.7]	-0.9	0.00585222	Genetic Information Processing	Replication and repair	03030 DNA replication [PATH:ko03030]	4
RFA1, RPA1, rpa; replication factor A1	-0.9	0.00585222	Genetic Information Processing	Replication and repair	03030 DNA replication [PATH:ko03030]	4
ERCC6, CSB, RAD26; DNA excision repair protein ERCC-6	-0.9	0.00585222	Genetic Information Processing	Replication and repair	03420 Nucleotide excision repair [PATH:ko03420]	4
CRN, CRNKL1, CLF1, SYF3; crooked neck	-0.9	0.00585222	Genetic Information Processing	Transcription	03040 Spliceosome [PATH:ko03040]	4
SYF1, XAB2; pre-mRNA-splicing factor SYF1	-0.9	0.00585222	Genetic Information Processing	Transcription	03040 Spliceosome [PATH:ko03040]	4
LYS2; L-aminoadipate-semialdehyde dehydrogenase [EC:1.2.1.31]	-0.9	0.00585222	Metabolism	Amino acid metabolism	00300 Lysine biosynthesis [PATH:ko00300]	4
E1.6.2.2; cytochrome-b5 reductase [EC:1.6.2.2]	-0.9	0.00585222	Metabolism	Carbohydrate metabolism	00520 Amino sugar and nucleotide sugar metabolism [PATH:ko00520]	4
VPS4; vacuolar protein-sorting-associated protein 4	-0.883333	0.00864959	Cellular Processes	Transport and catabolism	04144 Endocytosis [PATH:ko04144]	4
DYNC1H; dynein heavy chain 1, cytosolic	-0.883333	0.00864959	Cellular Processes	Transport and catabolism	04145 Phagosome [PATH:ko04145]	4
PI4K; phosphatidylinositol 4-kinase [EC:2.7.1.67]	-0.883333	0.00864959	Environmental Information Processing	Signal transduction	04070 Phosphatidylinositol signaling system [PATH:ko04070]	4
TRIP12; E3 ubiquitin-protein ligase TRIP12 [EC:6.3.2.19]	-0.883333	0.00864959	Genetic Information Processing	Folding, sorting and degradation	04120 Ubiquitin mediated proteolysis [PATH:ko04120]	4
ERN1; serine/threonine-protein kinase/endoribonuclease IRE1 [EC:2.7.11.1 3.1.26.-]	-0.883333	0.00864959	Genetic Information Processing	Folding, sorting and degradation	04141 Protein processing in endoplasmic reticulum [PATH:ko04141]	4
RFC1; replication factor C subunit 1	-0.883333	0.00864959	Genetic Information Processing	Replication and repair	03030 DNA replication [PATH:ko03030]	4
RAD54L, RAD54; DNA repair and recombination protein RAD54 and RAD54-like protein [EC:3.6.4.-]	-0.883333	0.00864959	Genetic Information Processing	Replication and repair	03440 Homologous recombination [PATH:ko03440]	4
TOP3; DNA topoisomerase III [EC:5.99.1.2]	-0.883333	0.00864959	Genetic Information Processing	Replication and repair	03440 Homologous recombination [PATH:ko03440]	4
RPA1, POLR1A; DNA-directed RNA polymerase I subunit RPA1 [EC:2.7.7.6]	-0.883333	0.00864959	Genetic Information Processing	Transcription	03020 RNA polymerase [PATH:ko03020]	4
DHX15, PRP43; pre-mRNA-splicing factor ATP-dependent RNA helicase DHX15/PRP43 [EC:3.6.4.13]	-0.883333	0.00864959	Genetic Information Processing	Transcription	03040 Spliceosome [PATH:ko03040]	4
PPIL1; peptidyl-prolyl cis-trans isomerase-like 1 [EC:5.2.1.8]	-0.883333	0.00864959	Genetic Information Processing	Transcription	03040 Spliceosome [PATH:ko03040]	4
SF3B1, SAP155; splicing factor 3B subunit 1	-0.883333	0.00864959	Genetic Information Processing	Transcription	03040 Spliceosome [PATH:ko03040]	4
XPO1, CRM1; exportin-1	-0.883333	0.00864959	Genetic Information Processing	Translation	03008 Ribosome biogenesis in eukaryotes [PATH:ko03008]	4
UPF2, RENT2; regulator of nonsense transcripts 2	-0.883333	0.00864959	Genetic Information Processing	Translation	03013 RNA transport [PATH:ko03013]	4
CHS1; chitin synthase [EC:2.4.1.16]	-0.883333	0.00864959	Metabolism	Carbohydrate metabolism	00520 Amino sugar and nucleotide sugar metabolism [PATH:ko00520]	4
FAS2; fatty acid synthase subunit alpha, fungi type [EC:2.3.1.86]	-0.883333	0.00864959	Metabolism	Lipid metabolism	00061 Fatty acid biosynthesis [PATH:ko00061]	4
ACLY; ATP citrate (pro-S)-lyase [EC:2.3.3.8]	-0.883333	0.00864959	Metabolism	Carbohydrate metabolism	00020 Citrate cycle (TCA cycle) [PATH:ko00020]	4
RIM15; serine/threonine-protein kinase RIM15 [EC:2.7.11.1]	-0.866667	0.0119802	Cellular Processes	Cell growth and death	04113 Meiosis - yeast [PATH:ko04113]	4
DNM; dynamin GTPase [EC:3.6.5.5]	-0.866667	0.0119802	Cellular Processes	Transport and catabolism	04144 Endocytosis [PATH:ko04144]	4
SKI2, SKIV2L; antiviral helicase SKI2 [EC:3.6.4.-]	-0.866667	0.0119802	Genetic Information Processing	Folding, sorting and degradation	03018 RNA degradation [PATH:ko03018]	4
SKI3, TTC37; superkiller protein 3	-0.866667	0.0119802	Genetic Information Processing	Folding, sorting and degradation	03018 RNA degradation [PATH:ko03018]	4
XRN1, SEP1, KEM1; 5'-3' exoribonuclease 1 [EC:3.1.13.-]	-0.866667	0.0119802	Genetic Information Processing	Folding, sorting and degradation	03018 RNA degradation [PATH:ko03018]	4
PSMD1, RPN2; 26S proteasome regulatory subunit N2	-0.866667	0.0119802	Genetic Information Processing	Folding, sorting and degradation	03050 Proteasome [PATH:ko03050]	4
MAN1; mannosyl-oligosaccharide alpha-1,2-mannosidase [EC:3.2.1.113]	-0.866667	0.0119802	Genetic Information Processing	Folding, sorting and degradation	04141 Protein processing in endoplasmic reticulum [PATH:ko04141]	4
DNA2; DNA replication ATP-dependent helicase Dna2 [EC:3.6.4.12]	-0.866667	0.0119802	Genetic Information Processing	Replication and repair	03030 DNA replication [PATH:ko03030]	4
MSH3; DNA mismatch repair protein MSH3	-0.866667	0.0119802	Genetic Information Processing	Replication and repair	03430 Mismatch repair [PATH:ko03430]	4
RPB2, POLR2B; DNA-directed RNA polymerase II subunit RPB2 [EC:2.7.7.6]	-0.866667	0.0119802	Genetic Information Processing	Transcription	03020 RNA polymerase [PATH:ko03020]	4
RPC1, POLR3A; DNA-directed RNA polymerase III subunit RPC1 [EC:2.7.7.6]	-0.866667	0.0119802	Genetic Information Processing	Transcription	03020 RNA polymerase [PATH:ko03020]	4
RPC2, POLR3B; DNA-directed RNA polymerase III subunit RPC2 [EC:2.7.7.6]	-0.866667	0.0119802	Genetic Information Processing	Transcription	03020 RNA polymerase [PATH:ko03020]	4
AQR; intron-binding protein aquarius	-0.866667	0.0119802	Genetic Information Processing	Transcription	03040 Spliceosome [PATH:ko03040]	4
THOC2; THO complex subunit 2	-0.866667	0.0119802	Genetic Information Processing	Transcription	03040 Spliceosome [PATH:ko03040]	4
UPF1, RENT1; regulator of nonsense transcripts 1 [EC:3.6.4.-]	-0.866667	0.0119802	Genetic Information Processing	Translation	03013 RNA transport [PATH:ko03013]	4
E2.3.3.10; hydroxymethylglutaryl-CoA synthase [EC:2.3.3.10]	-0.866667	0.0119802	Metabolism	Amino acid metabolism	00280 Valine, leucine and isoleucine degradation [PATH:ko00280]	4
LEU1; 3-isopropylmalate dehydratase [EC:4.2.1.33]	-0.866667	0.0119802	Metabolism	Amino acid metabolism	00290 Valine, leucine and isoleucine biosynthesis [PATH:ko00290]	4
ARO1; pentafunctional AROM polypeptide [EC:4.2.3.4 4.2.1.10 1.1.1.25 2.7.1.71 2.5.1.19]	-0.866667	0.0119802	Metabolism	Amino acid metabolism	00400 Phenylalanine, tyrosine and tryptophan biosynthesis [PATH:ko00400]	4
E3.2.1.58; glucan 1,3-beta-glucosidase [EC:3.2.1.58]	-0.866667	0.0119802	Metabolism	Carbohydrate metabolism	00500 Starch and sucrose metabolism [PATH:ko00500]	4
FAS1; fatty acid synthase subunit beta, fungi type [EC:2.3.1.86]	-0.866667	0.0119802	Metabolism	Lipid metabolism	00061 Fatty acid biosynthesis [PATH:ko00061]	4
SMC2; structural maintenance of chromosome 2	-0.85	0.0161686	Cellular Processes	Cell growth and death	04111 Cell cycle - yeast [PATH:ko04111]	4
YCG1, CAPG; condensin complex subunit 3	-0.85	0.0161686	Cellular Processes	Cell growth and death	04111 Cell cycle - yeast [PATH:ko04111]	4
NPLOC4, NPL4; nuclear protein localization protein 4 homolog	-0.85	0.0161686	Genetic Information Processing	Folding, sorting and degradation	04141 Protein processing in endoplasmic reticulum [PATH:ko04141]	4
SNRNP200, BRR2; pre-mRNA-splicing helicase BRR2 [EC:3.6.4.13]	-0.85	0.0161686	Genetic Information Processing	Transcription	03040 Spliceosome [PATH:ko03040]	4
EIF4G; translation initiation factor 4G	-0.85	0.0161686	Genetic Information Processing	Translation	03013 RNA transport [PATH:ko03013]	4
PPCDC, coaC; phosphopantothenoylcysteine decarboxylase [EC:4.1.1.36]	-0.85	0.0161686	Metabolism	Metabolism of cofactors and vitamins	00770 Pantothenate and CoA biosynthesis [PATH:ko00770]	4
ADE5; phosphoribosylamine--glycine ligase / phosphoribosylformylglycinamidine cyclo-ligase [EC:6.3.4.13 6.3.3.1]	-0.85	0.0161686	Metabolism	Nucleotide metabolism	00230 Purine metabolism [PATH:ko00230]	4
GANAB; alpha 1,3-glucosidase [EC:3.2.1.84]	-0.833333	0.020874	Genetic Information Processing	Folding, sorting and degradation	04141 Protein processing in endoplasmic reticulum [PATH:ko04141]	4
MSH2; DNA mismatch repair protein MSH2	-0.833333	0.020874	Genetic Information Processing	Replication and repair	03430 Mismatch repair [PATH:ko03430]	4
RPA2, POLR1B; DNA-directed RNA polymerase I subunit RPA2 [EC:2.7.7.6]	-0.833333	0.020874	Genetic Information Processing	Transcription	03020 RNA polymerase [PATH:ko03020]	4
RPB1, POLR2A; DNA-directed RNA polymerase II subunit RPB1 [EC:2.7.7.6]	-0.833333	0.020874	Genetic Information Processing	Transcription	03020 RNA polymerase [PATH:ko03020]	4
DDX46, PRP5; ATP-dependent RNA helicase DDX46/PRP5 [EC:3.6.4.13]	-0.833333	0.020874	Genetic Information Processing	Transcription	03040 Spliceosome [PATH:ko03040]	4
RP-S4e, RPS4; small subunit ribosomal protein S4e	-0.833333	0.020874	Genetic Information Processing	Translation	03010 Ribosome [PATH:ko03010]	4
GPT, ALT; alanine transaminase [EC:2.6.1.2]	-0.833333	0.020874	Metabolism	Amino acid metabolism	00250 Alanine, aspartate and glutamate metabolism [PATH:ko00250]	4
OXCT; 3-oxoacid CoA-transferase [EC:2.8.3.5]	-0.833333	0.020874	Metabolism	Amino acid metabolism	00280 Valine, leucine and isoleucine degradation [PATH:ko00280]	4
E5.4.99.5; chorismate mutase [EC:5.4.99.5]	-0.833333	0.020874	Metabolism	Amino acid metabolism	00400 Phenylalanine, tyrosine and tryptophan biosynthesis [PATH:ko00400]	4
E4.1.1.1, pdc; pyruvate decarboxylase [EC:4.1.1.1]	-0.833333	0.020874	Metabolism	Carbohydrate metabolism	00010 Glycolysis / Gluconeogenesis [PATH:ko00010]	4
MDH2; malate dehydrogenase [EC:1.1.1.37]	-0.833333	0.020874	Metabolism	Carbohydrate metabolism	00020 Citrate cycle (TCA cycle) [PATH:ko00020]	4
POMT; dolichyl-phosphate-mannose-protein mannosyltransferase [EC:2.4.1.109]	-0.833333	0.020874	Metabolism	Glycan biosynthesis and metabolism	00514 Other types of O-glycan biosynthesis [PATH:ko00514]	4
PAFAH; platelet-activating factor acetylhydrolase [EC:3.1.1.47]	-0.833333	0.020874	Metabolism	Lipid metabolism	00565 Ether lipid metabolism [PATH:ko00565]	4
PPP2R5; protein phosphatase 2 (formerly 2A), regulatory subunit B'	-0.816667	0.0264014	Cellular Processes	Cell growth and death	04113 Meiosis - yeast [PATH:ko04113]	4
PSMC4, RPT3; 26S proteasome regulatory subunit T3	-0.816667	0.0264014	Genetic Information Processing	Folding, sorting and degradation	03050 Proteasome [PATH:ko03050]	4
DHX38, PRP16; pre-mRNA-splicing factor ATP-dependent RNA helicase PRP16 [EC:3.6.4.13]	-0.816667	0.0264014	Genetic Information Processing	Transcription	03040 Spliceosome [PATH:ko03040]	4
EIF3A; translation initiation factor 3 subunit A	-0.816667	0.0264014	Genetic Information Processing	Translation	03013 RNA transport [PATH:ko03013]	4
CPSF3, YSH1; cleavage and polyadenylation specificity factor subunit 3 [EC:3.1.27.-]	-0.816667	0.0264014	Genetic Information Processing	Translation	03015 mRNA surveillance pathway [PATH:ko03015]	4
TRP; tryptophan synthase [EC:4.2.1.20]	-0.816667	0.0264014	Metabolism	Amino acid metabolism	00260 Glycine, serine and threonine metabolism [PATH:ko00260]	4
AGL; glycogen debranching enzyme [EC:2.4.1.25 3.2.1.33]	-0.816667	0.0264014	Metabolism	Carbohydrate metabolism	00500 Starch and sucrose metabolism [PATH:ko00500]	4
MVD, mvaD; diphosphomevalonate decarboxylase [EC:4.1.1.33]	-0.816667	0.0264014	Metabolism	Metabolism of terpenoids and polyketides	00900 Terpenoid backbone biosynthesis [PATH:ko00900]	4
HSPA1_8; heat shock 70kDa protein 1/8	-0.8	0.0326626	Cellular Processes	Transport and catabolism	04144 Endocytosis [PATH:ko04144]	4
ATPeVA, ATP6A1; V-type H+-transporting ATPase subunit A [EC:3.6.3.14]	-0.8	0.0326626	Cellular Processes	Transport and catabolism	04145 Phagosome [PATH:ko04145]	4
PSMC1, RPT2; 26S proteasome regulatory subunit T2	-0.8	0.0326626	Genetic Information Processing	Folding, sorting and degradation	03050 Proteasome [PATH:ko03050]	4
PSMD2, RPN1; 26S proteasome regulatory subunit N1	-0.8	0.0326626	Genetic Information Processing	Folding, sorting and degradation	03050 Proteasome [PATH:ko03050]	4
HUGT; UDP-glucose:glycoprotein glucosyltransferase [EC:2.4.1.-]	-0.8	0.0326626	Genetic Information Processing	Folding, sorting and degradation	04141 Protein processing in endoplasmic reticulum [PATH:ko04141]	4
EIF4A3, FAL1; ATP-dependent RNA helicase [EC:3.6.4.13]	-0.8	0.0326626	Genetic Information Processing	Transcription	03040 Spliceosome [PATH:ko03040]	4
PLRG1, PRL1, PRP46; pleiotropic regulator 1	-0.8	0.0326626	Genetic Information Processing	Transcription	03040 Spliceosome [PATH:ko03040]	4
PRPF8, PRP8; pre-mRNA-processing factor 8	-0.8	0.0326626	Genetic Information Processing	Transcription	03040 Spliceosome [PATH:ko03040]	4
EIF3C; translation initiation factor 3 subunit C	-0.8	0.0326626	Genetic Information Processing	Translation	03013 RNA transport [PATH:ko03013]	4
LSC1; succinyl-CoA synthetase alpha subunit [EC:6.2.1.4 6.2.1.5]	-0.8	0.0326626	Metabolism	Carbohydrate metabolism	00020 Citrate cycle (TCA cycle) [PATH:ko00020]	4
E3.6.3.6; H+-transporting ATPase [EC:3.6.3.6]	-0.8	0.0326626	Metabolism	Energy metabolism	00190 Oxidative phosphorylation [PATH:ko00190]	4
E1.3.1.70, TM7SF2, ERG24; delta14-sterol reductase [EC:1.3.1.70]	-0.8	0.0326626	Metabolism	Lipid metabolism	00100 Steroid biosynthesis [PATH:ko00100]	4
PCYT1; choline-phosphate cytidylyltransferase [EC:2.7.7.15]	-0.8	0.0326626	Metabolism	Lipid metabolism	00564 Glycerophospholipid metabolism [PATH:ko00564]	4
COQ2; 4-hydroxybenzoate hexaprenyltransferase [EC:2.5.1.-]	-0.8	0.0326626	Metabolism	Metabolism of cofactors and vitamins	00130 Ubiquinone and other terpenoid-quinone biosynthesis [PATH:ko00130]	4
DIS3, RRP44; exosome complex exonuclease DIS3/RRP44 [EC:3.1.13.-]	-0.783333	0.0397463	Genetic Information Processing	Folding, sorting and degradation	03018 RNA degradation [PATH:ko03018]	4
UBE1C, UBA3; ubiquitin-activating enzyme E1 C [EC:6.3.2.19]	-0.783333	0.0397463	Genetic Information Processing	Folding, sorting and degradation	04120 Ubiquitin mediated proteolysis [PATH:ko04120]	4
DNAJA2; DnaJ homolog subfamily A member 2	-0.783333	0.0397463	Genetic Information Processing	Folding, sorting and degradation	04141 Protein processing in endoplasmic reticulum [PATH:ko04141]	4
ERCC2, XPD; DNA excision repair protein ERCC-2 [EC:3.6.4.12]	-0.783333	0.0397463	Genetic Information Processing	Replication and repair	03420 Nucleotide excision repair [PATH:ko03420]	4
MSH6; DNA mismatch repair protein MSH6	-0.783333	0.0397463	Genetic Information Processing	Replication and repair	03430 Mismatch repair [PATH:ko03430]	4
RP-L3e, RPL3; large subunit ribosomal protein L3e	-0.783333	0.0397463	Genetic Information Processing	Translation	03010 Ribosome [PATH:ko03010]	4
EIF4A; translation initiation factor 4A	-0.783333	0.0397463	Genetic Information Processing	Translation	03013 RNA transport [PATH:ko03013]	4
TRP1; anthranilate synthase / indole-3-glycerol phosphate synthase / phosphoribosylanthranilate isomerase [EC:4.1.3.27 4.1.1.48 5.3.1.24]	-0.783333	0.0397463	Metabolism	Amino acid metabolism	00400 Phenylalanine, tyrosine and tryptophan biosynthesis [PATH:ko00400]	4
HSPA5, BIP; heat shock 70kDa protein 5	-0.766667	0.0476383	Genetic Information Processing	Folding, sorting and degradation	03060 Protein export [PATH:ko03060]	4
OGG1; N-glycosylase/DNA lyase [EC:3.2.2.- 4.2.99.18]	-0.766667	0.0476383	Genetic Information Processing	Replication and repair	03410 Base excision repair [PATH:ko03410]	4
RAD50; DNA repair protein RAD50 [EC:3.6.-.-]	-0.766667	0.0476383	Genetic Information Processing	Replication and repair	03440 Homologous recombination [PATH:ko03440]	4
TAF5; transcription initiation factor TFIID subunit 5	-0.766667	0.0476383	Genetic Information Processing	Transcription	03022 Basal transcription factors [PATH:ko03022]	4
DHX16; pre-mRNA-splicing factor ATP-dependent RNA helicase DHX16 [EC:3.6.4.13]	-0.766667	0.0476383	Genetic Information Processing	Transcription	03040 Spliceosome [PATH:ko03040]	4
EIF3D; translation initiation factor 3 subunit D	-0.766667	0.0476383	Genetic Information Processing	Translation	03013 RNA transport [PATH:ko03013]	4
URE; urease [EC:3.5.1.5]	-0.766667	0.0476383	Metabolism	Amino acid metabolism	00330 Arginine and proline metabolism [PATH:ko00330]	4
E3.5.4.6, AMPD; AMP deaminase [EC:3.5.4.6]	-0.766667	0.0476383	Metabolism	Nucleotide metabolism	00230 Purine metabolism [PATH:ko00230]	4
pssA, CHO1; phosphatidylserine synthase [EC:2.7.8.8]	0.766667	0.0476383	Metabolism	Amino acid metabolism	00260 Glycine, serine and threonine metabolism [PATH:ko00260]	1
lpxB; lipid-A-disaccharide synthase [EC:2.4.1.182]	0.766667	0.0476383	Metabolism	Glycan biosynthesis and metabolism	00540 Lipopolysaccharide biosynthesis [PATH:ko00540]	1
gshA; glutamate--cysteine ligase [EC:6.3.2.2]	0.766667	0.0476383	Metabolism	Metabolism of other amino acids	00480 Glutathione metabolism [PATH:ko00480]	1
E1.4.3.21, AOC2, AOC3, tynA; primary-amine oxidase [EC:1.4.3.21]	0.783333	0.0397463	Metabolism	Amino acid metabolism	00260 Glycine, serine and threonine metabolism [PATH:ko00260]	1
E2.4.1.21, glgA; starch synthase [EC:2.4.1.21]	0.783333	0.0397463	Metabolism	Carbohydrate metabolism	00500 Starch and sucrose metabolism [PATH:ko00500]	1
E1.11.1.9; glutathione peroxidase [EC:1.11.1.9]	0.783333	0.0397463	Metabolism	Lipid metabolism	00590 Arachidonic acid metabolism [PATH:ko00590]	1
ABC.LPT.P, lolC, lolE; lipoprotein-releasing system permease protein	0.8	0.0326626	Environmental Information Processing	Membrane transport	02010 ABC transporters [PATH:ko02010]	1
CYTB, petB; ubiquinol-cytochrome c reductase cytochrome b subunit	0.8	0.0326626	Environmental Information Processing	Signal transduction	02020 Two-component system [PATH:ko02020]	1
mutS2; DNA mismatch repair protein MutS2	0.8	0.0326626	Genetic Information Processing	Replication and repair	03430 Mismatch repair [PATH:ko03430]	1
E4.1.1.19S, speA; arginine decarboxylase [EC:4.1.1.19]	0.8	0.0326626	Metabolism	Amino acid metabolism	00330 Arginine and proline metabolism [PATH:ko00330]	1
wecB; UDP-N-acetylglucosamine 2-epimerase [EC:5.1.3.14]	0.8	0.0326626	Metabolism	Carbohydrate metabolism	00520 Amino sugar and nucleotide sugar metabolism [PATH:ko00520]	1
FUCA; alpha-L-fucosidase [EC:3.2.1.51]	0.8	0.0326626	Metabolism	Glycan biosynthesis and metabolism	00511 Other glycan degradation [PATH:ko00511]	1
kdsB; 3-deoxy-manno-octulosonate cytidylyltransferase (CMP-KDO synthetase) [EC:2.7.7.38]	0.8	0.0326626	Metabolism	Glycan biosynthesis and metabolism	00540 Lipopolysaccharide biosynthesis [PATH:ko00540]	1
lpxC; UDP-3-O-[3-hydroxymyristoyl] N-acetylglucosamine deacetylase [EC:3.5.1.108]	0.8	0.0326626	Metabolism	Glycan biosynthesis and metabolism	00540 Lipopolysaccharide biosynthesis [PATH:ko00540]	1
nadE; NAD+ synthase [EC:6.3.1.5]	0.8	0.0326626	Metabolism	Metabolism of cofactors and vitamins	00760 Nicotinate and nicotinamide metabolism [PATH:ko00760]	1
SIG3.2, rpoE; RNA polymerase sigma-70 factor, ECF subfamily	0.816667	0.0264014	Genetic Information Processing	Transcription	03020 RNA polymerase [PATH:ko03020]	1
glnG, ntrC; two-component system, NtrC family, nitrogen regulation response regulator GlnG	0.816667	0.0264014	Environmental Information Processing	Signal transduction	02020 Two-component system [PATH:ko02020]	1
E3.5.2.9; 5-oxoprolinase (ATP-hydrolysing) [EC:3.5.2.9]	0.816667	0.0264014	Metabolism	Metabolism of other amino acids	00480 Glutathione metabolism [PATH:ko00480]	1
ftsA; cell division protein FtsA	0.833333	0.020874	Cellular Processes	Cell growth and death	04112 Cell cycle - Caulobacter [PATH:ko04112]	1
SIG54, rpoN; RNA polymerase sigma-54 factor	0.833333	0.020874	Environmental Information Processing	Signal transduction	02020 Two-component system [PATH:ko02020]	1
rhlE; ATP-dependent RNA helicase RhlE [EC:3.6.4.13]	0.833333	0.020874	Genetic Information Processing	Folding, sorting and degradation	03018 RNA degradation [PATH:ko03018]	1
recJ; single-stranded-DNA-specific exonuclease [EC:3.1.-.-]	0.833333	0.020874	Genetic Information Processing	Replication and repair	03410 Base excision repair [PATH:ko03410]	1
E1.2.4.4C, bkdA; 2-oxoisovalerate dehydrogenase E1 component [EC:1.2.4.4]	0.833333	0.020874	Metabolism	Amino acid metabolism	00280 Valine, leucine and isoleucine degradation [PATH:ko00280]	1
cysI; sulfite reductase (NADPH) hemoprotein beta-component [EC:1.8.1.2]	0.833333	0.020874	Metabolism	Energy metabolism	00920 Sulfur metabolism [PATH:ko00920]	1
E1.1.1.271, fcl; GDP-L-fucose synthase [EC:1.1.1.271]	0.833333	0.020874	Metabolism	Carbohydrate metabolism	00051 Fructose and mannose metabolism [PATH:ko00051]	1
E3.1.2.6, gloB; hydroxyacylglutathione hydrolase [EC:3.1.2.6]	0.833333	0.020874	Metabolism	Carbohydrate metabolism	00620 Pyruvate metabolism [PATH:ko00620]	1
mqo; malate dehydrogenase (quinone) [EC:1.1.5.4]	0.833333	0.020874	Metabolism	Carbohydrate metabolism	00620 Pyruvate metabolism [PATH:ko00620]	1
surE; 5'-nucleotidase [EC:3.1.3.5]	0.833333	0.020874	Metabolism	Metabolism of cofactors and vitamins	00760 Nicotinate and nicotinamide metabolism [PATH:ko00760]	1
bioA; adenosylmethionine-8-amino-7-oxononanoate aminotransferase [EC:2.6.1.62]	0.833333	0.020874	Metabolism	Metabolism of cofactors and vitamins	00780 Biotin metabolism [PATH:ko00780]	1
hemF, CPOX; coproporphyrinogen III oxidase [EC:1.3.3.3]	0.833333	0.020874	Metabolism	Metabolism of cofactors and vitamins	00860 Porphyrin and chlorophyll metabolism [PATH:ko00860]	1
ccmC; heme exporter protein C	0.85	0.0161686	Environmental Information Processing	Membrane transport	02010 ABC transporters [PATH:ko02010]	1
lptB; lipopolysaccharide export system ATP-binding protein [EC:3.6.3.-]	0.85	0.0161686	Environmental Information Processing	Membrane transport	02010 ABC transporters [PATH:ko02010]	1
yidC, spoIIIJ, OXA1; preprotein translocase subunit YidC	0.85	0.0161686	Environmental Information Processing	Membrane transport	03070 Bacterial secretion system [PATH:ko03070]	1
E2.3.1.37, ALAS; 5-aminolevulinate synthase [EC:2.3.1.37]	0.85	0.0161686	Metabolism	Amino acid metabolism	00260 Glycine, serine and threonine metabolism [PATH:ko00260]	1
E2.3.1.30, cysE; serine O-acetyltransferase [EC:2.3.1.30]	0.85	0.0161686	Metabolism	Amino acid metabolism	00270 Cysteine and methionine metabolism [PATH:ko00270]	1
E1.1.2.8; alcohol dehydrogenase (cytochrome c) [EC:1.1.2.8]	0.85	0.0161686	Metabolism	Carbohydrate metabolism	00010 Glycolysis / Gluconeogenesis [PATH:ko00010]	1
uxaA; altronate hydrolase [EC:4.2.1.7]	0.85	0.0161686	Metabolism	Carbohydrate metabolism	00040 Pentose and glucuronate interconversions [PATH:ko00040]	1
uxaC; glucuronate isomerase [EC:5.3.1.12]	0.85	0.0161686	Metabolism	Carbohydrate metabolism	00040 Pentose and glucuronate interconversions [PATH:ko00040]	1
E2.5.1.56, neuB; N-acetylneuraminate synthase [EC:2.5.1.56]	0.85	0.0161686	Metabolism	Carbohydrate metabolism	00520 Amino sugar and nucleotide sugar metabolism [PATH:ko00520]	1
glmM; phosphoglucosamine mutase [EC:5.4.2.10]	0.85	0.0161686	Metabolism	Carbohydrate metabolism	00520 Amino sugar and nucleotide sugar metabolism [PATH:ko00520]	1
nagB, GNPDA; glucosamine-6-phosphate deaminase [EC:3.5.99.6]	0.85	0.0161686	Metabolism	Carbohydrate metabolism	00520 Amino sugar and nucleotide sugar metabolism [PATH:ko00520]	1
E2.1.1.45, thyA; thymidylate synthase [EC:2.1.1.45]	0.85	0.0161686	Metabolism	Metabolism of cofactors and vitamins	00670 One carbon pool by folate [PATH:ko00670]	1
kdsA; 2-dehydro-3-deoxyphosphooctonate aldolase (KDO 8-P synthase) [EC:2.5.1.55]	0.85	0.0161686	Metabolism	Glycan biosynthesis and metabolism	00540 Lipopolysaccharide biosynthesis [PATH:ko00540]	1
mrcA; penicillin-binding protein 1A [EC:2.4.1.- 3.4.-.-]	0.85	0.0161686	Metabolism	Glycan biosynthesis and metabolism	00550 Peptidoglycan biosynthesis [PATH:ko00550]	1
fabB; 3-oxoacyl-[acyl-carrier-protein] synthase I [EC:2.3.1.41]	0.85	0.0161686	Metabolism	Lipid metabolism	00061 Fatty acid biosynthesis [PATH:ko00061]	1
ispB; octaprenyl-diphosphate synthase [EC:2.5.1.90]	0.85	0.0161686	Metabolism	Metabolism of terpenoids and polyketides	00900 Terpenoid backbone biosynthesis [PATH:ko00900]	1
motB; chemotaxis protein MotB	0.85	0.0161686	Cellular Processes	Cell motility	02030 Bacterial chemotaxis [PATH:ko02030]	1
E1.3.3.6, ACOX1, ACOX3; acyl-CoA oxidase [EC:1.3.3.6]	0.866667	0.0119802	Cellular Processes	Transport and catabolism	04146 Peroxisome [PATH:ko04146]	1
ABC.FEV.S; iron complex transport system substrate-binding protein	0.866667	0.0119802	Environmental Information Processing	Membrane transport	02010 ABC transporters [PATH:ko02010]	1
proX; glycine betaine/proline transport system substrate-binding protein	0.866667	0.0119802	Environmental Information Processing	Membrane transport	02010 ABC transporters [PATH:ko02010]	1
glyQ; glycyl-tRNA synthetase alpha chain [EC:6.1.1.14]	0.866667	0.0119802	Genetic Information Processing	Translation	00970 Aminoacyl-tRNA biosynthesis [PATH:ko00970]	1
aspA; aspartate ammonia-lyase [EC:4.3.1.1]	0.866667	0.0119802	Metabolism	Amino acid metabolism	00250 Alanine, aspartate and glutamate metabolism [PATH:ko00250]	1
E2.6.1.1A, aspB; aspartate aminotransferase [EC:2.6.1.1]	0.866667	0.0119802	Metabolism	Amino acid metabolism	00250 Alanine, aspartate and glutamate metabolism [PATH:ko00250]	1
E1.2.4.4A, bkdA1; 2-oxoisovalerate dehydrogenase E1 component, alpha subunit [EC:1.2.4.4]	0.866667	0.0119802	Metabolism	Amino acid metabolism	00280 Valine, leucine and isoleucine degradation [PATH:ko00280]	1
E2.3.1.-; [EC:2.3.1.-]	0.866667	0.0119802	Metabolism	Amino acid metabolism	00350 Tyrosine metabolism [PATH:ko00350]	1
npdA; NAD-dependent deacetylase [EC:3.5.1.-]	0.866667	0.0119802	Metabolism	Carbohydrate metabolism	00520 Amino sugar and nucleotide sugar metabolism [PATH:ko00520]	1
E1.1.1.40, maeB; malate dehydrogenase (oxaloacetate-decarboxylating)(NADP+) [EC:1.1.1.40]	0.866667	0.0119802	Metabolism	Carbohydrate metabolism	00620 Pyruvate metabolism [PATH:ko00620]	1
cynT, can; carbonic anhydrase [EC:4.2.1.1]	0.866667	0.0119802	Metabolism	Energy metabolism	00910 Nitrogen metabolism [PATH:ko00910]	1
E3.1.3.1, phoA, phoB; alkaline phosphatase [EC:3.1.3.1]	0.866667	0.0119802	Environmental Information Processing	Signal transduction	02020 Two-component system [PATH:ko02020]	1
spoT, HDDC3; guanosine-3',5'-bis(diphosphate) 3'-pyrophosphohydrolase [EC:3.1.7.2]	0.866667	0.0119802	Metabolism	Nucleotide metabolism	00230 Purine metabolism [PATH:ko00230]	1
mcp; methyl-accepting chemotaxis protein	0.866667	0.0119802	Cellular Processes	Cell motility	02030 Bacterial chemotaxis [PATH:ko02030]	1
rseP; regulator of sigma E protease [EC:3.4.24.-]	0.883333	0.00864959	Cellular Processes	Cell growth and death	04112 Cell cycle - Caulobacter [PATH:ko04112]	1
E3.2.1.4; endoglucanase [EC:3.2.1.4]	0.883333	0.00864959	Metabolism	Carbohydrate metabolism	00500 Starch and sucrose metabolism [PATH:ko00500]	1
ntrX; two-component system, NtrC family, nitrogen regulation response regulator NtrX	0.883333	0.00864959	Environmental Information Processing	Signal transduction	02020 Two-component system [PATH:ko02020]	1
RP-L7, rplL; large subunit ribosomal protein L7/L12	0.883333	0.00864959	Genetic Information Processing	Translation	03010 Ribosome [PATH:ko03010]	1
RP-S10, rpsJ; small subunit ribosomal protein S10	0.883333	0.00864959	Genetic Information Processing	Translation	03010 Ribosome [PATH:ko03010]	1
E1.4.1.3; glutamate dehydrogenase (NAD(P)+) [EC:1.4.1.3]	0.883333	0.00864959	Metabolism	Amino acid metabolism	00250 Alanine, aspartate and glutamate metabolism [PATH:ko00250]	1
kbl, GCAT; glycine C-acetyltransferase [EC:2.3.1.29]	0.883333	0.00864959	Metabolism	Amino acid metabolism	00260 Glycine, serine and threonine metabolism [PATH:ko00260]	1
E2.1.1.10, mmuM; homocysteine S-methyltransferase [EC:2.1.1.10]	0.883333	0.00864959	Metabolism	Amino acid metabolism	00270 Cysteine and methionine metabolism [PATH:ko00270]	1
E2.5.1.16, SRM, speE; spermidine synthase [EC:2.5.1.16]	0.883333	0.00864959	Metabolism	Amino acid metabolism	00270 Cysteine and methionine metabolism [PATH:ko00270]	1
E1.5.1.2, proC; pyrroline-5-carboxylate reductase [EC:1.5.1.2]	0.883333	0.00864959	Metabolism	Amino acid metabolism	00330 Arginine and proline metabolism [PATH:ko00330]	1
E4.1.1.17, ODC1, speC, speF; ornithine decarboxylase [EC:4.1.1.17]	0.883333	0.00864959	Metabolism	Amino acid metabolism	00330 Arginine and proline metabolism [PATH:ko00330]	1
paaK; phenylacetate-CoA ligase [EC:6.2.1.30]	0.883333	0.00864959	Metabolism	Amino acid metabolism	00360 Phenylalanine metabolism [PATH:ko00360]	1
E1.1.1.14, gutB; L-iditol 2-dehydrogenase [EC:1.1.1.14]	0.883333	0.00864959	Metabolism	Carbohydrate metabolism	00051 Fructose and mannose metabolism [PATH:ko00051]	1
E2.4.1.-; [EC:2.4.1.-]	0.883333	0.00864959	Metabolism	Carbohydrate metabolism	00051 Fructose and mannose metabolism [PATH:ko00051]	1
E1.1.2.3, lldD; L-lactate dehydrogenase (cytochrome) [EC:1.1.2.3]	0.883333	0.00864959	Metabolism	Carbohydrate metabolism	00620 Pyruvate metabolism [PATH:ko00620]	1
ubiB, aarF; ubiquinone biosynthesis protein	0.883333	0.00864959	Metabolism	Metabolism of cofactors and vitamins	00130 Ubiquinone and other terpenoid-quinone biosynthesis [PATH:ko00130]	1
E1.6.99.3; NADH dehydrogenase [EC:1.6.99.3]	0.883333	0.00864959	Metabolism	Energy metabolism	00190 Oxidative phosphorylation [PATH:ko00190]	1
fadN; 3-hydroxyacyl-CoA dehydrogenase [EC:1.1.1.35]	0.883333	0.00864959	Metabolism	Energy metabolism	00720 Carbon fixation pathways in prokaryotes [PATH:ko00720]	1
ribH, RIB4; 6,7-dimethyl-8-ribityllumazine synthase [EC:2.5.1.78]	0.883333	0.00864959	Metabolism	Metabolism of cofactors and vitamins	00740 Riboflavin metabolism [PATH:ko00740]	1
dacC, dacA, dacD; D-alanyl-D-alanine carboxypeptidase (penicillin-binding protein 5/6) [EC:3.4.16.4]	0.883333	0.00864959	Metabolism	Glycan biosynthesis and metabolism	00550 Peptidoglycan biosynthesis [PATH:ko00550]	1
GGPS; geranylgeranyl diphosphate synthase, type II [EC:2.5.1.1 2.5.1.10 2.5.1.29]	0.883333	0.00864959	Metabolism	Metabolism of terpenoids and polyketides	00900 Terpenoid backbone biosynthesis [PATH:ko00900]	1
miaA, TRIT1; tRNA dimethylallyltransferase [EC:2.5.1.75]	0.883333	0.00864959	Metabolism	Metabolism of terpenoids and polyketides	00908 Zeatin biosynthesis [PATH:ko00908]	1
E3.5.4.3, guaD; guanine deaminase [EC:3.5.4.3]	0.883333	0.00864959	Metabolism	Nucleotide metabolism	00230 Purine metabolism [PATH:ko00230]	1
accC; acetyl-CoA carboxylase, biotin carboxylase subunit [EC:6.4.1.2 6.3.4.14]	0.9	0.00585222	Metabolism	Carbohydrate metabolism	00620 Pyruvate metabolism [PATH:ko00620]	1
mdh; malate dehydrogenase [EC:1.1.1.37]	0.9	0.00585222	Metabolism	Carbohydrate metabolism	00020 Citrate cycle (TCA cycle) [PATH:ko00020]	1
PC, pyc; pyruvate carboxylase [EC:6.4.1.1]	0.9	0.00585222	Metabolism	Carbohydrate metabolism	00020 Citrate cycle (TCA cycle) [PATH:ko00020]	1
IDH1, IDH2, icd; isocitrate dehydrogenase [EC:1.1.1.42]	0.9	0.00585222	Cellular Processes	Transport and catabolism	04146 Peroxisome [PATH:ko04146]	1
ABC.LPT.A, lolD; lipoprotein-releasing system ATP-binding protein [EC:3.6.3.-]	0.9	0.00585222	Environmental Information Processing	Membrane transport	02010 ABC transporters [PATH:ko02010]	1
AACS, acsA; acetoacetyl-CoA synthetase [EC:6.2.1.16]	0.9	0.00585222	Metabolism	Carbohydrate metabolism	00650 Butanoate metabolism [PATH:ko00650]	1
msmX, msmK; maltose/maltodextrin transport system ATP-binding protein	0.9	0.00585222	Environmental Information Processing	Membrane transport	02010 ABC transporters [PATH:ko02010]	1
phnE; phosphonate transport system permease protein	0.9	0.00585222	Environmental Information Processing	Membrane transport	02010 ABC transporters [PATH:ko02010]	1
tatC; sec-independent protein translocase protein TatC	0.9	0.00585222	Environmental Information Processing	Membrane transport	03070 Bacterial secretion system [PATH:ko03070]	1
E4.4.1.5, GLO1, gloA; lactoylglutathione lyase [EC:4.4.1.5]	0.9	0.00585222	Environmental Information Processing	Signal transduction	04011 MAPK signaling pathway - yeast [PATH:ko04011]	1
E2.7.7.41, CDS1, CDS2, cdsA; phosphatidate cytidylyltransferase [EC:2.7.7.41]	0.9	0.00585222	Environmental Information Processing	Signal transduction	04070 Phosphatidylinositol signaling system [PATH:ko04070]	1
rnr, vacB; ribonuclease R [EC:3.1.-.-]	0.9	0.00585222	Genetic Information Processing	Folding, sorting and degradation	03018 RNA degradation [PATH:ko03018]	1
MOCS2, moaE; molybdopterin synthase catalytic subunit [EC:2.-.-.-]	0.9	0.00585222	Genetic Information Processing	Folding, sorting and degradation	04122 Sulfur relay system [PATH:ko04122]	1
DPO3E, dnaQ; DNA polymerase III subunit epsilon [EC:2.7.7.7]	0.9	0.00585222	Genetic Information Processing	Replication and repair	03030 DNA replication [PATH:ko03030]	1
mutL; DNA mismatch repair protein MutL	0.9	0.00585222	Genetic Information Processing	Replication and repair	03430 Mismatch repair [PATH:ko03430]	1
glyS; glycyl-tRNA synthetase beta chain [EC:6.1.1.14]	0.9	0.00585222	Genetic Information Processing	Translation	00970 Aminoacyl-tRNA biosynthesis [PATH:ko00970]	1
RP-L2, rplB; large subunit ribosomal protein L2	0.9	0.00585222	Genetic Information Processing	Translation	03010 Ribosome [PATH:ko03010]	1
RP-L21, rplU; large subunit ribosomal protein L21	0.9	0.00585222	Genetic Information Processing	Translation	03010 Ribosome [PATH:ko03010]	1
RP-L22, rplV; large subunit ribosomal protein L22	0.9	0.00585222	Genetic Information Processing	Translation	03010 Ribosome [PATH:ko03010]	1
RP-L27, rpmA; large subunit ribosomal protein L27	0.9	0.00585222	Genetic Information Processing	Translation	03010 Ribosome [PATH:ko03010]	1
RP-L28, rpmB; large subunit ribosomal protein L28	0.9	0.00585222	Genetic Information Processing	Translation	03010 Ribosome [PATH:ko03010]	1
RP-L9, rplI; large subunit ribosomal protein L9	0.9	0.00585222	Genetic Information Processing	Translation	03010 Ribosome [PATH:ko03010]	1
RP-S13, rpsM; small subunit ribosomal protein S13	0.9	0.00585222	Genetic Information Processing	Translation	03010 Ribosome [PATH:ko03010]	1
RP-S17, rpsQ; small subunit ribosomal protein S17	0.9	0.00585222	Genetic Information Processing	Translation	03010 Ribosome [PATH:ko03010]	1
E3.5.1.1, ansA, ansB; L-asparaginase [EC:3.5.1.1]	0.9	0.00585222	Metabolism	Amino acid metabolism	00250 Alanine, aspartate and glutamate metabolism [PATH:ko00250]	1
puuE; 4-aminobutyrate aminotransferase [EC:2.6.1.19]	0.9	0.00585222	Metabolism	Amino acid metabolism	00250 Alanine, aspartate and glutamate metabolism [PATH:ko00250]	1
DMGDH; dimethylglycine dehydrogenase [EC:1.5.8.4]	0.9	0.00585222	Metabolism	Amino acid metabolism	00260 Glycine, serine and threonine metabolism [PATH:ko00260]	1
E1.1.99.1, betA, CHDH; choline dehydrogenase [EC:1.1.99.1]	0.9	0.00585222	Metabolism	Amino acid metabolism	00260 Glycine, serine and threonine metabolism [PATH:ko00260]	1
GLDC, gcvP; glycine dehydrogenase [EC:1.4.4.2]	0.9	0.00585222	Metabolism	Amino acid metabolism	00260 Glycine, serine and threonine metabolism [PATH:ko00260]	1
thrB1; homoserine kinase [EC:2.7.1.39]	0.9	0.00585222	Metabolism	Amino acid metabolism	00260 Glycine, serine and threonine metabolism [PATH:ko00260]	1
E2.5.1.49, metY; O-acetylhomoserine (thiol)-lyase [EC:2.5.1.49]	0.9	0.00585222	Metabolism	Amino acid metabolism	00270 Cysteine and methionine metabolism [PATH:ko00270]	1
E1.1.1.31, mmsB; 3-hydroxyisobutyrate dehydrogenase [EC:1.1.1.31]	0.9	0.00585222	Metabolism	Amino acid metabolism	00280 Valine, leucine and isoleucine degradation [PATH:ko00280]	1
E2.6.1.18; beta-alanine--pyruvate transaminase [EC:2.6.1.18]	0.9	0.00585222	Metabolism	Amino acid metabolism	00280 Valine, leucine and isoleucine degradation [PATH:ko00280]	1
E2.8.3.5B, scoB; 3-oxoacid CoA-transferase subunit B [EC:2.8.3.5]	0.9	0.00585222	Metabolism	Amino acid metabolism	00280 Valine, leucine and isoleucine degradation [PATH:ko00280]	1
adhP; alcohol dehydrogenase, propanol-preferring [EC:1.1.1.1]	0.9	0.00585222	Metabolism	Amino acid metabolism	00350 Tyrosine metabolism [PATH:ko00350]	1
FAH, fahA; fumarylacetoacetase [EC:3.7.1.2]	0.9	0.00585222	Metabolism	Amino acid metabolism	00350 Tyrosine metabolism [PATH:ko00350]	1
FBA, fbaA; fructose-bisphosphate aldolase, class II [EC:4.1.2.13]	0.9	0.00585222	Metabolism	Carbohydrate metabolism	00010 Glycolysis / Gluconeogenesis [PATH:ko00010]	1
IDH3; isocitrate dehydrogenase (NAD+) [EC:1.1.1.41]	0.9	0.00585222	Metabolism	Carbohydrate metabolism	00020 Citrate cycle (TCA cycle) [PATH:ko00020]	1
cysC; adenylylsulfate kinase [EC:2.7.1.25]	0.9	0.00585222	Metabolism	Energy metabolism	00920 Sulfur metabolism [PATH:ko00920]	1
sdhC; succinate dehydrogenase cytochrome b556 subunit	0.9	0.00585222	Metabolism	Carbohydrate metabolism	00020 Citrate cycle (TCA cycle) [PATH:ko00020]	1
rpe, RPE; ribulose-phosphate 3-epimerase [EC:5.1.3.1]	0.9	0.00585222	Metabolism	Carbohydrate metabolism	00030 Pentose phosphate pathway [PATH:ko00030]	1
E5.3.1.8, manA; mannose-6-phosphate isomerase [EC:5.3.1.8]	0.9	0.00585222	Metabolism	Carbohydrate metabolism	00051 Fructose and mannose metabolism [PATH:ko00051]	1
manC, cpsB; mannose-1-phosphate guanylyltransferase [EC:2.7.7.13]	0.9	0.00585222	Metabolism	Carbohydrate metabolism	00051 Fructose and mannose metabolism [PATH:ko00051]	1
otsA; trehalose 6-phosphate synthase [EC:2.4.1.15]	0.9	0.00585222	Metabolism	Carbohydrate metabolism	00500 Starch and sucrose metabolism [PATH:ko00500]	1
E3.5.1.25, nagA, AMDHD2; N-acetylglucosamine-6-phosphate deacetylase [EC:3.5.1.25]	0.9	0.00585222	Metabolism	Carbohydrate metabolism	00520 Amino sugar and nucleotide sugar metabolism [PATH:ko00520]	1
E6.2.1.17, prpE; propionyl-CoA synthetase [EC:6.2.1.17]	0.9	0.00585222	Metabolism	Carbohydrate metabolism	00640 Propanoate metabolism [PATH:ko00640]	1
ATPF0A, atpB; F-type H+-transporting ATPase subunit a [EC:3.6.3.14]	0.9	0.00585222	Metabolism	Energy metabolism	00190 Oxidative phosphorylation [PATH:ko00190]	1
ubiD; 3-octaprenyl-4-hydroxybenzoate carboxy-lyase UbiD [EC:4.1.1.-]	0.9	0.00585222	Metabolism	Metabolism of cofactors and vitamins	00130 Ubiquinone and other terpenoid-quinone biosynthesis [PATH:ko00130]	1
coxC; cytochrome c oxidase subunit III [EC:1.9.3.1]	0.9	0.00585222	Metabolism	Energy metabolism	00190 Oxidative phosphorylation [PATH:ko00190]	1
nuoA; NADH-quinone oxidoreductase subunit A [EC:1.6.5.3]	0.9	0.00585222	Metabolism	Energy metabolism	00190 Oxidative phosphorylation [PATH:ko00190]	1
nuoF; NADH-quinone oxidoreductase subunit F [EC:1.6.5.3]	0.9	0.00585222	Metabolism	Energy metabolism	00190 Oxidative phosphorylation [PATH:ko00190]	1
nuoM; NADH-quinone oxidoreductase subunit M [EC:1.6.5.3]	0.9	0.00585222	Metabolism	Energy metabolism	00190 Oxidative phosphorylation [PATH:ko00190]	1
frmB, ESD, fghA; S-formylglutathione hydrolase [EC:3.1.2.12]	0.9	0.00585222	Metabolism	Energy metabolism	00680 Methane metabolism [PATH:ko00680]	1
ribF; riboflavin kinase / FMN adenylyltransferase [EC:2.7.1.26 2.7.7.2]	0.9	0.00585222	Metabolism	Metabolism of cofactors and vitamins	00740 Riboflavin metabolism [PATH:ko00740]	1
fabZ; 3-hydroxyacyl-[acyl-carrier-protein] dehydratase [EC:4.2.1.59]	0.9	0.00585222	Metabolism	Lipid metabolism	00061 Fatty acid biosynthesis [PATH:ko00061]	1
plsY; glycerol-3-phosphate acyltransferase PlsY [EC:2.3.1.15]	0.9	0.00585222	Metabolism	Lipid metabolism	00561 Glycerolipid metabolism [PATH:ko00561]	1
panE, apbA; 2-dehydropantoate 2-reductase [EC:1.1.1.169]	0.9	0.00585222	Metabolism	Metabolism of cofactors and vitamins	00770 Pantothenate and CoA biosynthesis [PATH:ko00770]	1
E1.8.1.7, GSR, gor; glutathione reductase (NADPH) [EC:1.8.1.7]	0.9	0.00585222	Metabolism	Metabolism of other amino acids	00480 Glutathione metabolism [PATH:ko00480]	1
E1.2.1.-; [EC:1.2.1.-]	0.9	0.00585222	Metabolism	Metabolism of terpenoids and polyketides	00281 Geraniol degradation [PATH:ko00281]	1
E2.4.2.7, apt; adenine phosphoribosyltransferase [EC:2.4.2.7]	0.9	0.00585222	Metabolism	Nucleotide metabolism	00230 Purine metabolism [PATH:ko00230]	1
E2.7.4.8, gmk; guanylate kinase [EC:2.7.4.8]	0.9	0.00585222	Metabolism	Nucleotide metabolism	00230 Purine metabolism [PATH:ko00230]	1
PPX1; exopolyphosphatase [EC:3.6.1.11]	0.9	0.00585222	Metabolism	Nucleotide metabolism	00230 Purine metabolism [PATH:ko00230]	1
relA; GTP pyrophosphokinase [EC:2.7.6.5]	0.9	0.00585222	Metabolism	Nucleotide metabolism	00230 Purine metabolism [PATH:ko00230]	1
E3.5.4.5, cdd; cytidine deaminase [EC:3.5.4.5]	0.9	0.00585222	Metabolism	Nucleotide metabolism	00240 Pyrimidine metabolism [PATH:ko00240]	1
pyrD; dihydroorotate dehydrogenase (fumarate) [EC:1.3.98.1]	0.9	0.00585222	Metabolism	Nucleotide metabolism	00240 Pyrimidine metabolism [PATH:ko00240]	1
fhs; formate--tetrahydrofolate ligase [EC:6.3.4.3]	0.916667	0.00363313	Metabolism	Energy metabolism	00720 Carbon fixation pathways in prokaryotes [PATH:ko00720]	1
ABC.FEV.A; iron complex transport system ATP-binding protein [EC:3.6.3.34]	0.916667	0.00363313	Environmental Information Processing	Membrane transport	02010 ABC transporters [PATH:ko02010]	1
cbiO; cobalt/nickel transport system ATP-binding protein	0.916667	0.00363313	Environmental Information Processing	Membrane transport	02010 ABC transporters [PATH:ko02010]	1
phoB; two-component system, OmpR family, phosphate regulon response regulator PhoB	0.916667	0.00363313	Environmental Information Processing	Signal transduction	02020 Two-component system [PATH:ko02020]	1
DPO3D1, holA; DNA polymerase III subunit delta [EC:2.7.7.7]	0.916667	0.00363313	Genetic Information Processing	Replication and repair	03030 DNA replication [PATH:ko03030]	1
E3.1.26.4A, RNASEH1, rnhA; ribonuclease HI [EC:3.1.26.4]	0.916667	0.00363313	Genetic Information Processing	Replication and repair	03030 DNA replication [PATH:ko03030]	1
xseA; exodeoxyribonuclease VII large subunit [EC:3.1.11.6]	0.916667	0.00363313	Genetic Information Processing	Replication and repair	03430 Mismatch repair [PATH:ko03430]	1
recB; exodeoxyribonuclease V beta subunit [EC:3.1.11.5]	0.916667	0.00363313	Genetic Information Processing	Replication and repair	03440 Homologous recombination [PATH:ko03440]	1
RP-L18, rplR; large subunit ribosomal protein L18	0.916667	0.00363313	Genetic Information Processing	Translation	03010 Ribosome [PATH:ko03010]	1
RP-L31, rpmE; large subunit ribosomal protein L31	0.916667	0.00363313	Genetic Information Processing	Translation	03010 Ribosome [PATH:ko03010]	1
RP-S15, rpsO; small subunit ribosomal protein S15	0.916667	0.00363313	Genetic Information Processing	Translation	03010 Ribosome [PATH:ko03010]	1
E4.3.1.17, sdaA; L-serine dehydratase [EC:4.3.1.17]	0.916667	0.00363313	Metabolism	Amino acid metabolism	00260 Glycine, serine and threonine metabolism [PATH:ko00260]	1
K06001, trpB; tryptophan synthase beta chain [EC:4.2.1.20]	0.916667	0.00363313	Metabolism	Amino acid metabolism	00260 Glycine, serine and threonine metabolism [PATH:ko00260]	1
E5.4.99.2; methylmalonyl-CoA mutase [EC:5.4.99.2]	0.916667	0.00363313	Metabolism	Amino acid metabolism	00280 Valine, leucine and isoleucine degradation [PATH:ko00280]	1
argB; acetylglutamate kinase [EC:2.7.2.8]	0.916667	0.00363313	Metabolism	Amino acid metabolism	00330 Arginine and proline metabolism [PATH:ko00330]	1
E5.3.1.16, hisA; phosphoribosylformimino-5-aminoimidazole carboxamide ribotide isomerase [EC:5.3.1.16]	0.916667	0.00363313	Metabolism	Amino acid metabolism	00340 Histidine metabolism [PATH:ko00340]	1
hpaI; 2,4-dihydroxyhept-2-ene-1,7-dioic acid aldolase [EC:4.1.2.-]	0.916667	0.00363313	Metabolism	Amino acid metabolism	00350 Tyrosine metabolism [PATH:ko00350]	1
aroQ, qutE; 3-dehydroquinate dehydratase II [EC:4.2.1.10]	0.916667	0.00363313	Metabolism	Amino acid metabolism	00400 Phenylalanine, tyrosine and tryptophan biosynthesis [PATH:ko00400]	1
glk; glucokinase [EC:2.7.1.2]	0.916667	0.00363313	Metabolism	Biosynthesis of other secondary metabolites	00521 Streptomycin biosynthesis [PATH:ko00521]	1
bglX; beta-glucosidase [EC:3.2.1.21]	0.916667	0.00363313	Metabolism	Biosynthesis of other secondary metabolites	00940 Phenylpropanoid biosynthesis [PATH:ko00940]	1
E3.2.1.52, nagZ; beta-N-acetylhexosaminidase [EC:3.2.1.52]	0.916667	0.00363313	Metabolism	Carbohydrate metabolism	00520 Amino sugar and nucleotide sugar metabolism [PATH:ko00520]	1
nuoE; NADH-quinone oxidoreductase subunit E [EC:1.6.5.3]	0.916667	0.00363313	Metabolism	Energy metabolism	00190 Oxidative phosphorylation [PATH:ko00190]	1
SOD2; superoxide dismutase, Fe-Mn family [EC:1.15.1.1]	0.916667	0.00363313	Cellular Processes	Transport and catabolism	04146 Peroxisome [PATH:ko04146]	1
tauD; taurine dioxygenase [EC:1.14.11.17]	0.916667	0.00363313	Metabolism	Metabolism of other amino acids	00430 Taurine and hypotaurine metabolism [PATH:ko00430]	1
E3.8.1.2; 2-haloacid dehalogenase [EC:3.8.1.2]	0.916667	0.00363313	Metabolism	Xenobiotics biodegradation and metabolism	00361 Chlorocyclohexane and chlorobenzene degradation [PATH:ko00361]	1
E3.5.1.11; penicillin amidase [EC:3.5.1.11]	0.933333	0.0020874	Metabolism	Biosynthesis of other secondary metabolites	00311 Penicillin and cephalosporin biosynthesis [PATH:ko00311]	1
rfbD; dTDP-4-dehydrorhamnose reductase [EC:1.1.1.133]	0.933333	0.0020874	Metabolism	Biosynthesis of other secondary metabolites	00521 Streptomycin biosynthesis [PATH:ko00521]	1
dnaA; chromosomal replication initiator protein	0.933333	0.0020874	Cellular Processes	Cell growth and death	04112 Cell cycle - Caulobacter [PATH:ko04112]	1
dnaB; replicative DNA helicase [EC:3.6.4.12]	0.933333	0.0020874	Cellular Processes	Cell growth and death	04112 Cell cycle - Caulobacter [PATH:ko04112]	1
ftsW, spoVE; cell division protein FtsW	0.933333	0.0020874	Cellular Processes	Cell growth and death	04112 Cell cycle - Caulobacter [PATH:ko04112]	1
ppc; phosphoenolpyruvate carboxylase [EC:4.1.1.31]	0.933333	0.0020874	Metabolism	Carbohydrate metabolism	00620 Pyruvate metabolism [PATH:ko00620]	1
fliI; flagellum-specific ATP synthase [EC:3.6.3.14]	0.933333	0.0020874	Cellular Processes	Cell motility	02040 Flagellar assembly [PATH:ko02040]	1
AGXT; alanine-glyoxylate transaminase / serine-glyoxylate transaminase / serine-pyruvate transaminase [EC:2.6.1.44 2.6.1.45 2.6.1.51]	0.933333	0.0020874	Cellular Processes	Transport and catabolism	04146 Peroxisome [PATH:ko04146]	1
citE; citrate lyase subunit beta / citryl-CoA lyase [EC:4.1.3.6 4.1.3.34]	0.933333	0.0020874	Environmental Information Processing	Signal transduction	02020 Two-component system [PATH:ko02020]	1
msbA; ATP-binding cassette, subfamily B, bacterial MsbA [EC:3.6.3.-]	0.933333	0.0020874	Environmental Information Processing	Membrane transport	02010 ABC transporters [PATH:ko02010]	1
potA; spermidine/putrescine transport system ATP-binding protein [EC:3.6.3.31]	0.933333	0.0020874	Environmental Information Processing	Membrane transport	02010 ABC transporters [PATH:ko02010]	1
secDF; SecD/SecF fusion protein	0.933333	0.0020874	Environmental Information Processing	Membrane transport	03070 Bacterial secretion system [PATH:ko03070]	1
proV; glycine betaine/proline transport system ATP-binding protein [EC:3.6.3.32]	0.933333	0.0020874	Environmental Information Processing	Membrane transport	02010 ABC transporters [PATH:ko02010]	1
pstB; phosphate transport system ATP-binding protein [EC:3.6.3.27]	0.933333	0.0020874	Environmental Information Processing	Membrane transport	02010 ABC transporters [PATH:ko02010]	1
pstC; phosphate transport system permease protein	0.933333	0.0020874	Environmental Information Processing	Membrane transport	02010 ABC transporters [PATH:ko02010]	1
tctA; putative tricarboxylic transport membrane protein	0.933333	0.0020874	Environmental Information Processing	Signal transduction	02020 Two-component system [PATH:ko02020]	1
pcnB; poly(A) polymerase [EC:2.7.7.19]	0.933333	0.0020874	Genetic Information Processing	Folding, sorting and degradation	03018 RNA degradation [PATH:ko03018]	1
rnj; ribonuclease J [EC:3.1.-.-]	0.933333	0.0020874	Genetic Information Processing	Folding, sorting and degradation	03018 RNA degradation [PATH:ko03018]	1
iscS, NFS1; cysteine desulfurase [EC:2.8.1.7]	0.933333	0.0020874	Genetic Information Processing	Folding, sorting and degradation	04122 Sulfur relay system [PATH:ko04122]	1
mraY; phospho-N-acetylmuramoyl-pentapeptide-transferase [EC:2.7.8.13]	0.933333	0.0020874	Metabolism	Glycan biosynthesis and metabolism	00550 Peptidoglycan biosynthesis [PATH:ko00550]	1
E3.1.1.45; carboxymethylenebutenolidase [EC:3.1.1.45]	0.933333	0.0020874	Metabolism	Xenobiotics biodegradation and metabolism	00361 Chlorocyclohexane and chlorobenzene degradation [PATH:ko00361]	1
mutY; A/G-specific adenine glycosylase [EC:3.2.2.-]	0.933333	0.0020874	Genetic Information Processing	Replication and repair	03410 Base excision repair [PATH:ko03410]	1
NTH; endonuclease III [EC:4.2.99.18]	0.933333	0.0020874	Genetic Information Processing	Replication and repair	03410 Base excision repair [PATH:ko03410]	1
tag; DNA-3-methyladenine glycosylase I [EC:3.2.2.20]	0.933333	0.0020874	Genetic Information Processing	Replication and repair	03410 Base excision repair [PATH:ko03410]	1
recA; recombination protein RecA	0.933333	0.0020874	Genetic Information Processing	Replication and repair	03440 Homologous recombination [PATH:ko03440]	1
recD; exodeoxyribonuclease V alpha subunit [EC:3.1.11.5]	0.933333	0.0020874	Genetic Information Processing	Replication and repair	03440 Homologous recombination [PATH:ko03440]	1
ruvA; holliday junction DNA helicase RuvA [EC:3.6.4.12]	0.933333	0.0020874	Genetic Information Processing	Replication and repair	03440 Homologous recombination [PATH:ko03440]	1
ruvC; crossover junction endodeoxyribonuclease RuvC [EC:3.1.22.4]	0.933333	0.0020874	Genetic Information Processing	Replication and repair	03440 Homologous recombination [PATH:ko03440]	1
rpoA; DNA-directed RNA polymerase subunit alpha [EC:2.7.7.6]	0.933333	0.0020874	Genetic Information Processing	Transcription	03020 RNA polymerase [PATH:ko03020]	1
rpoBC; DNA-directed RNA polymerase subunit beta-beta' [EC:2.7.7.6]	0.933333	0.0020874	Genetic Information Processing	Transcription	03020 RNA polymerase [PATH:ko03020]	1
DARS, aspS; aspartyl-tRNA synthetase [EC:6.1.1.12]	0.933333	0.0020874	Genetic Information Processing	Translation	00970 Aminoacyl-tRNA biosynthesis [PATH:ko00970]	1
HARS, hisS; histidyl-tRNA synthetase [EC:6.1.1.21]	0.933333	0.0020874	Genetic Information Processing	Translation	00970 Aminoacyl-tRNA biosynthesis [PATH:ko00970]	1
KARS, lysS; lysyl-tRNA synthetase, class II [EC:6.1.1.6]	0.933333	0.0020874	Genetic Information Processing	Translation	00970 Aminoacyl-tRNA biosynthesis [PATH:ko00970]	1
MTFMT, fmt; methionyl-tRNA formyltransferase [EC:2.1.2.9]	0.933333	0.0020874	Genetic Information Processing	Translation	00970 Aminoacyl-tRNA biosynthesis [PATH:ko00970]	1
RARS, argS; arginyl-tRNA synthetase [EC:6.1.1.19]	0.933333	0.0020874	Genetic Information Processing	Translation	00970 Aminoacyl-tRNA biosynthesis [PATH:ko00970]	1
TARS, thrS; threonyl-tRNA synthetase [EC:6.1.1.3]	0.933333	0.0020874	Genetic Information Processing	Translation	00970 Aminoacyl-tRNA biosynthesis [PATH:ko00970]	1
RP-L10, rplJ; large subunit ribosomal protein L10	0.933333	0.0020874	Genetic Information Processing	Translation	03010 Ribosome [PATH:ko03010]	1
RP-L13, rplM; large subunit ribosomal protein L13	0.933333	0.0020874	Genetic Information Processing	Translation	03010 Ribosome [PATH:ko03010]	1
RP-L14, rplN; large subunit ribosomal protein L14	0.933333	0.0020874	Genetic Information Processing	Translation	03010 Ribosome [PATH:ko03010]	1
RP-L15, rplO; large subunit ribosomal protein L15	0.933333	0.0020874	Genetic Information Processing	Translation	03010 Ribosome [PATH:ko03010]	1
RP-L16, rplP; large subunit ribosomal protein L16	0.933333	0.0020874	Genetic Information Processing	Translation	03010 Ribosome [PATH:ko03010]	1
RP-L19, rplS; large subunit ribosomal protein L19	0.933333	0.0020874	Genetic Information Processing	Translation	03010 Ribosome [PATH:ko03010]	1
RP-L20, rplT; large subunit ribosomal protein L20	0.933333	0.0020874	Genetic Information Processing	Translation	03010 Ribosome [PATH:ko03010]	1
RP-L24, rplX; large subunit ribosomal protein L24	0.933333	0.0020874	Genetic Information Processing	Translation	03010 Ribosome [PATH:ko03010]	1
RP-L3, rplC; large subunit ribosomal protein L3	0.933333	0.0020874	Genetic Information Processing	Translation	03010 Ribosome [PATH:ko03010]	1
RP-L4, rplD; large subunit ribosomal protein L4	0.933333	0.0020874	Genetic Information Processing	Translation	03010 Ribosome [PATH:ko03010]	1
RP-S11, rpsK; small subunit ribosomal protein S11	0.933333	0.0020874	Genetic Information Processing	Translation	03010 Ribosome [PATH:ko03010]	1
RP-S12, rpsL; small subunit ribosomal protein S12	0.933333	0.0020874	Genetic Information Processing	Translation	03010 Ribosome [PATH:ko03010]	1
RP-S18, rpsR; small subunit ribosomal protein S18	0.933333	0.0020874	Genetic Information Processing	Translation	03010 Ribosome [PATH:ko03010]	1
RP-S3, rpsC; small subunit ribosomal protein S3	0.933333	0.0020874	Genetic Information Processing	Translation	03010 Ribosome [PATH:ko03010]	1
RP-S4, rpsD; small subunit ribosomal protein S4	0.933333	0.0020874	Genetic Information Processing	Translation	03010 Ribosome [PATH:ko03010]	1
RP-S6, rpsF; small subunit ribosomal protein S6	0.933333	0.0020874	Genetic Information Processing	Translation	03010 Ribosome [PATH:ko03010]	1
RP-S7, rpsG; small subunit ribosomal protein S7	0.933333	0.0020874	Genetic Information Processing	Translation	03010 Ribosome [PATH:ko03010]	1
rnz; ribonuclease Z [EC:3.1.26.11]	0.933333	0.0020874	Genetic Information Processing	Translation	03013 RNA transport [PATH:ko03013]	1
asnB, ASNS; asparagine synthase (glutamine-hydrolysing) [EC:6.3.5.4]	0.933333	0.0020874	Metabolism	Amino acid metabolism	00250 Alanine, aspartate and glutamate metabolism [PATH:ko00250]	1
E4.3.2.2, purB; adenylosuccinate lyase [EC:4.3.2.2]	0.933333	0.0020874	Metabolism	Amino acid metabolism	00250 Alanine, aspartate and glutamate metabolism [PATH:ko00250]	1
E6.3.4.5, argG; argininosuccinate synthase [EC:6.3.4.5]	0.933333	0.0020874	Metabolism	Amino acid metabolism	00250 Alanine, aspartate and glutamate metabolism [PATH:ko00250]	1
putA; proline dehydrogenase / delta 1-pyrroline-5-carboxylate dehydrogenase [EC:1.5.99.8 1.5.1.12]	0.933333	0.0020874	Metabolism	Amino acid metabolism	00250 Alanine, aspartate and glutamate metabolism [PATH:ko00250]	1
E1.1.1.3; homoserine dehydrogenase [EC:1.1.1.3]	0.933333	0.0020874	Metabolism	Amino acid metabolism	00260 Glycine, serine and threonine metabolism [PATH:ko00260]	1
E4.2.1.22, CBS; cystathionine beta-synthase [EC:4.2.1.22]	0.933333	0.0020874	Metabolism	Amino acid metabolism	00260 Glycine, serine and threonine metabolism [PATH:ko00260]	1
E4.4.1.1; cystathionine gamma-lyase [EC:4.4.1.1]	0.933333	0.0020874	Metabolism	Amino acid metabolism	00260 Glycine, serine and threonine metabolism [PATH:ko00260]	1
glyA, SHMT; glycine hydroxymethyltransferase [EC:2.1.2.1]	0.933333	0.0020874	Metabolism	Amino acid metabolism	00260 Glycine, serine and threonine metabolism [PATH:ko00260]	1
soxA; sarcosine oxidase, subunit alpha [EC:1.5.3.1]	0.933333	0.0020874	Metabolism	Amino acid metabolism	00260 Glycine, serine and threonine metabolism [PATH:ko00260]	1
cysK; cysteine synthase A [EC:2.5.1.47]	0.933333	0.0020874	Metabolism	Amino acid metabolism	00270 Cysteine and methionine metabolism [PATH:ko00270]	1
E2.1.1.14, metE; 5-methyltetrahydropteroyltriglutamate--homocysteine methyltransferase [EC:2.1.1.14]	0.933333	0.0020874	Metabolism	Amino acid metabolism	00270 Cysteine and methionine metabolism [PATH:ko00270]	1
E2.4.2.28, mtaP; 5'-methylthioadenosine phosphorylase [EC:2.4.2.28]	0.933333	0.0020874	Metabolism	Amino acid metabolism	00270 Cysteine and methionine metabolism [PATH:ko00270]	1
E2.5.1.48, metB; cystathionine gamma-synthase [EC:2.5.1.48]	0.933333	0.0020874	Metabolism	Amino acid metabolism	00270 Cysteine and methionine metabolism [PATH:ko00270]	1
mtnA; methylthioribose-1-phosphate isomerase [EC:5.3.1.23]	0.933333	0.0020874	Metabolism	Amino acid metabolism	00270 Cysteine and methionine metabolism [PATH:ko00270]	1
ACADM, acd; acyl-CoA dehydrogenase [EC:1.3.8.7]	0.933333	0.0020874	Metabolism	Amino acid metabolism	00280 Valine, leucine and isoleucine degradation [PATH:ko00280]	1
E1.2.4.4B, bkdA2; 2-oxoisovalerate dehydrogenase E1 component, beta subunit [EC:1.2.4.4]	0.933333	0.0020874	Metabolism	Amino acid metabolism	00280 Valine, leucine and isoleucine degradation [PATH:ko00280]	1
E2.8.3.5A, scoA; 3-oxoacid CoA-transferase subunit A [EC:2.8.3.5]	0.933333	0.0020874	Metabolism	Amino acid metabolism	00280 Valine, leucine and isoleucine degradation [PATH:ko00280]	1
E6.4.1.4A; 3-methylcrotonyl-CoA carboxylase alpha subunit [EC:6.4.1.4]	0.933333	0.0020874	Metabolism	Amino acid metabolism	00280 Valine, leucine and isoleucine degradation [PATH:ko00280]	1
fadJ; 3-hydroxyacyl-CoA dehydrogenase / enoyl-CoA hydratase / 3-hydroxybutyryl-CoA epimerase [EC:1.1.1.35 4.2.1.17 5.1.2.3]	0.933333	0.0020874	Metabolism	Amino acid metabolism	00280 Valine, leucine and isoleucine degradation [PATH:ko00280]	1
leuB; 3-isopropylmalate dehydrogenase [EC:1.1.1.85]	0.933333	0.0020874	Metabolism	Amino acid metabolism	00290 Valine, leucine and isoleucine biosynthesis [PATH:ko00290]	1
leuD; 3-isopropylmalate/(R)-2-methylmalate dehydratase small subunit [EC:4.2.1.33 4.2.1.35]	0.933333	0.0020874	Metabolism	Amino acid metabolism	00290 Valine, leucine and isoleucine biosynthesis [PATH:ko00290]	1
dapB; dihydrodipicolinate reductase [EC:1.3.1.26]	0.933333	0.0020874	Metabolism	Amino acid metabolism	00300 Lysine biosynthesis [PATH:ko00300]	1
dapD; 2,3,4,5-tetrahydropyridine-2-carboxylate N-succinyltransferase [EC:2.3.1.117]	0.933333	0.0020874	Metabolism	Amino acid metabolism	00300 Lysine biosynthesis [PATH:ko00300]	1
dapE; succinyl-diaminopimelate desuccinylase [EC:3.5.1.18]	0.933333	0.0020874	Metabolism	Amino acid metabolism	00300 Lysine biosynthesis [PATH:ko00300]	1
dapF; diaminopimelate epimerase [EC:5.1.1.7]	0.933333	0.0020874	Metabolism	Amino acid metabolism	00300 Lysine biosynthesis [PATH:ko00300]	1
DLST, sucB; 2-oxoglutarate dehydrogenase E2 component (dihydrolipoamide succinyltransferase) [EC:2.3.1.61]	0.933333	0.0020874	Metabolism	Amino acid metabolism	00310 Lysine degradation [PATH:ko00310]	1
aguB; N-carbamoylputrescine amidase [EC:3.5.1.53]	0.933333	0.0020874	Metabolism	Amino acid metabolism	00330 Arginine and proline metabolism [PATH:ko00330]	1
E3.5.3.11, speB; agmatinase [EC:3.5.3.11]	0.933333	0.0020874	Metabolism	Amino acid metabolism	00330 Arginine and proline metabolism [PATH:ko00330]	1
E4.3.1.12, ocd; ornithine cyclodeaminase [EC:4.3.1.12]	0.933333	0.0020874	Metabolism	Amino acid metabolism	00330 Arginine and proline metabolism [PATH:ko00330]	1
hyuA; N-methylhydantoinase A [EC:3.5.2.14]	0.933333	0.0020874	Metabolism	Amino acid metabolism	00330 Arginine and proline metabolism [PATH:ko00330]	1
pip; proline iminopeptidase [EC:3.4.11.5]	0.933333	0.0020874	Metabolism	Amino acid metabolism	00330 Arginine and proline metabolism [PATH:ko00330]	1
proA; glutamate-5-semialdehyde dehydrogenase [EC:1.2.1.41]	0.933333	0.0020874	Metabolism	Amino acid metabolism	00330 Arginine and proline metabolism [PATH:ko00330]	1
E2.1.1.-; [EC:2.1.1.-]	0.933333	0.0020874	Metabolism	Amino acid metabolism	00340 Histidine metabolism [PATH:ko00340]	1
E4.2.1.19, hisB; imidazoleglycerol-phosphate dehydratase [EC:4.2.1.19]	0.933333	0.0020874	Metabolism	Amino acid metabolism	00340 Histidine metabolism [PATH:ko00340]	1
hisC; histidinol-phosphate aminotransferase [EC:2.6.1.9]	0.933333	0.0020874	Metabolism	Amino acid metabolism	00340 Histidine metabolism [PATH:ko00340]	1
hisH; glutamine amidotransferase [EC:2.4.2.-]	0.933333	0.0020874	Metabolism	Amino acid metabolism	00340 Histidine metabolism [PATH:ko00340]	1
hutU, UROC1; urocanate hydratase [EC:4.2.1.49]	0.933333	0.0020874	Metabolism	Amino acid metabolism	00340 Histidine metabolism [PATH:ko00340]	1
HPD, hppD; 4-hydroxyphenylpyruvate dioxygenase [EC:1.13.11.27]	0.933333	0.0020874	Metabolism	Amino acid metabolism	00350 Tyrosine metabolism [PATH:ko00350]	1
dadA; D-amino-acid dehydrogenase [EC:1.4.99.1]	0.933333	0.0020874	Metabolism	Amino acid metabolism	00360 Phenylalanine metabolism [PATH:ko00360]	1
paaH, hbd, fadB, mmgB; 3-hydroxybutyryl-CoA dehydrogenase [EC:1.1.1.157]	0.933333	0.0020874	Metabolism	Amino acid metabolism	00360 Phenylalanine metabolism [PATH:ko00360]	1
E3.7.1.3; kynureninase [EC:3.7.1.3]	0.933333	0.0020874	Metabolism	Amino acid metabolism	00380 Tryptophan metabolism [PATH:ko00380]	1
aroA; 3-phosphoshikimate 1-carboxyvinyltransferase [EC:2.5.1.19]	0.933333	0.0020874	Metabolism	Amino acid metabolism	00400 Phenylalanine, tyrosine and tryptophan biosynthesis [PATH:ko00400]	1
aroB; 3-dehydroquinate synthase [EC:4.2.3.4]	0.933333	0.0020874	Metabolism	Amino acid metabolism	00400 Phenylalanine, tyrosine and tryptophan biosynthesis [PATH:ko00400]	1
trpG; anthranilate synthase component II [EC:4.1.3.27]	0.933333	0.0020874	Metabolism	Amino acid metabolism	00400 Phenylalanine, tyrosine and tryptophan biosynthesis [PATH:ko00400]	1
E5.5.1.4, INO1; myo-inositol-1-phosphate synthase [EC:5.5.1.4]	0.933333	0.0020874	Metabolism	Biosynthesis of other secondary metabolites	00521 Streptomycin biosynthesis [PATH:ko00521]	1
iolG; myo-inositol 2-dehydrogenase [EC:1.1.1.18]	0.933333	0.0020874	Metabolism	Biosynthesis of other secondary metabolites	00521 Streptomycin biosynthesis [PATH:ko00521]	1
pgm; phosphoglucomutase [EC:5.4.2.2]	0.933333	0.0020874	Metabolism	Biosynthesis of other secondary metabolites	00521 Streptomycin biosynthesis [PATH:ko00521]	1
E4.1.1.49, pckA; phosphoenolpyruvate carboxykinase (ATP) [EC:4.1.1.49]	0.933333	0.0020874	Metabolism	Carbohydrate metabolism	00010 Glycolysis / Gluconeogenesis [PATH:ko00010]	1
E5.1.3.3, galM; aldose 1-epimerase [EC:5.1.3.3]	0.933333	0.0020874	Metabolism	Carbohydrate metabolism	00010 Glycolysis / Gluconeogenesis [PATH:ko00010]	1
sdhB; succinate dehydrogenase iron-sulfur subunit [EC:1.3.99.1]	0.933333	0.0020874	Metabolism	Carbohydrate metabolism	00020 Citrate cycle (TCA cycle) [PATH:ko00020]	1
deoB; phosphopentomutase [EC:5.4.2.7]	0.933333	0.0020874	Metabolism	Carbohydrate metabolism	00030 Pentose phosphate pathway [PATH:ko00030]	1
deoC, DERA; deoxyribose-phosphate aldolase [EC:4.1.2.4]	0.933333	0.0020874	Metabolism	Carbohydrate metabolism	00030 Pentose phosphate pathway [PATH:ko00030]	1
PRPS, prsA; ribose-phosphate pyrophosphokinase [EC:2.7.6.1]	0.933333	0.0020874	Metabolism	Carbohydrate metabolism	00030 Pentose phosphate pathway [PATH:ko00030]	1
rbsK, RBKS; ribokinase [EC:2.7.1.15]	0.933333	0.0020874	Metabolism	Carbohydrate metabolism	00030 Pentose phosphate pathway [PATH:ko00030]	1
xylA; xylose isomerase [EC:5.3.1.5]	0.933333	0.0020874	Metabolism	Carbohydrate metabolism	00040 Pentose and glucuronate interconversions [PATH:ko00040]	1
E1.1.1.-; [EC:1.1.1.-]	0.933333	0.0020874	Metabolism	Carbohydrate metabolism	00051 Fructose and mannose metabolism [PATH:ko00051]	1
E2.7.1.4, scrK; fructokinase [EC:2.7.1.4]	0.933333	0.0020874	Metabolism	Carbohydrate metabolism	00051 Fructose and mannose metabolism [PATH:ko00051]	1
E4.2.1.47, gmd; GDPmannose 4,6-dehydratase [EC:4.2.1.47]	0.933333	0.0020874	Metabolism	Carbohydrate metabolism	00051 Fructose and mannose metabolism [PATH:ko00051]	1
GMPP; mannose-1-phosphate guanylyltransferase [EC:2.7.7.13]	0.933333	0.0020874	Metabolism	Carbohydrate metabolism	00051 Fructose and mannose metabolism [PATH:ko00051]	1
dgoD; galactonate dehydratase [EC:4.2.1.6]	0.933333	0.0020874	Metabolism	Carbohydrate metabolism	00052 Galactose metabolism [PATH:ko00052]	1
galT, GALT; UDPglucose--hexose-1-phosphate uridylyltransferase [EC:2.7.7.12]	0.933333	0.0020874	Metabolism	Carbohydrate metabolism	00052 Galactose metabolism [PATH:ko00052]	1
glgC; glucose-1-phosphate adenylyltransferase [EC:2.7.7.27]	0.933333	0.0020874	Metabolism	Carbohydrate metabolism	00500 Starch and sucrose metabolism [PATH:ko00500]	1
E3.2.1.55, abfA; alpha-N-arabinofuranosidase [EC:3.2.1.55]	0.933333	0.0020874	Metabolism	Carbohydrate metabolism	00520 Amino sugar and nucleotide sugar metabolism [PATH:ko00520]	1
murA; UDP-N-acetylglucosamine 1-carboxyvinyltransferase [EC:2.5.1.7]	0.933333	0.0020874	Metabolism	Carbohydrate metabolism	00520 Amino sugar and nucleotide sugar metabolism [PATH:ko00520]	1
glnB; nitrogen regulatory protein P-II 1	0.933333	0.0020874	Environmental Information Processing	Signal transduction	02020 Two-component system [PATH:ko02020]	1
glnD; [protein-PII] uridylyltransferase [EC:2.7.7.59]	0.933333	0.0020874	Environmental Information Processing	Signal transduction	02020 Two-component system [PATH:ko02020]	1
opuA; osmoprotectant transport system ATP-binding protein	0.933333	0.0020874	Environmental Information Processing	Membrane transport	02010 ABC transporters [PATH:ko02010]	1
E3.1.3.18, gph; phosphoglycolate phosphatase [EC:3.1.3.18]	0.933333	0.0020874	Metabolism	Carbohydrate metabolism	00630 Glyoxylate and dicarboxylate metabolism [PATH:ko00630]	1
glcD; glycolate oxidase [EC:1.1.3.15]	0.933333	0.0020874	Metabolism	Carbohydrate metabolism	00630 Glyoxylate and dicarboxylate metabolism [PATH:ko00630]	1
glcF; glycolate oxidase iron-sulfur subunit	0.933333	0.0020874	Metabolism	Carbohydrate metabolism	00630 Glyoxylate and dicarboxylate metabolism [PATH:ko00630]	1
ttuC, dmlA; tartrate dehydrogenase/decarboxylase / D-malate dehydrogenase [EC:1.1.1.93 4.1.1.73 1.1.1.83]	0.933333	0.0020874	Metabolism	Carbohydrate metabolism	00630 Glyoxylate and dicarboxylate metabolism [PATH:ko00630]	1
E1.1.1.30, bdh; 3-hydroxybutyrate dehydrogenase [EC:1.1.1.30]	0.933333	0.0020874	Metabolism	Carbohydrate metabolism	00650 Butanoate metabolism [PATH:ko00650]	1
coxA; cytochrome c oxidase subunit I [EC:1.9.3.1]	0.933333	0.0020874	Metabolism	Energy metabolism	00190 Oxidative phosphorylation [PATH:ko00190]	1
coxB; cytochrome c oxidase subunit II [EC:1.9.3.1]	0.933333	0.0020874	Metabolism	Energy metabolism	00190 Oxidative phosphorylation [PATH:ko00190]	1
ndh; NADH dehydrogenase [EC:1.6.99.3]	0.933333	0.0020874	Metabolism	Energy metabolism	00190 Oxidative phosphorylation [PATH:ko00190]	1
nuoH; NADH-quinone oxidoreductase subunit H [EC:1.6.5.3]	0.933333	0.0020874	Metabolism	Energy metabolism	00190 Oxidative phosphorylation [PATH:ko00190]	1
nuoI; NADH-quinone oxidoreductase subunit I [EC:1.6.5.3]	0.933333	0.0020874	Metabolism	Energy metabolism	00190 Oxidative phosphorylation [PATH:ko00190]	1
nuoK; NADH-quinone oxidoreductase subunit K [EC:1.6.5.3]	0.933333	0.0020874	Metabolism	Energy metabolism	00190 Oxidative phosphorylation [PATH:ko00190]	1
nuoN; NADH-quinone oxidoreductase subunit N [EC:1.6.5.3]	0.933333	0.0020874	Metabolism	Energy metabolism	00190 Oxidative phosphorylation [PATH:ko00190]	1
E2.1.1.148, thyX, thy1; thymidylate synthase (FAD) [EC:2.1.1.148]	0.933333	0.0020874	Metabolism	Metabolism of cofactors and vitamins	00670 One carbon pool by folate [PATH:ko00670]	1
thiL; thiamine-monophosphate kinase [EC:2.7.4.16]	0.933333	0.0020874	Metabolism	Metabolism of cofactors and vitamins	00730 Thiamine metabolism [PATH:ko00730]	1
E1.13.12.16; nitronate monooxygenase [EC:1.13.12.16]	0.933333	0.0020874	Metabolism	Energy metabolism	00910 Nitrogen metabolism [PATH:ko00910]	1
nirB; nitrite reductase (NAD(P)H) large subunit [EC:1.7.1.4]	0.933333	0.0020874	Metabolism	Energy metabolism	00910 Nitrogen metabolism [PATH:ko00910]	1
E3.1.11.2, xthA; exodeoxyribonuclease III [EC:3.1.11.2]	0.933333	0.0020874	Genetic Information Processing	Replication and repair	03410 Base excision repair [PATH:ko03410]	1
pdxA; 4-hydroxythreonine-4-phosphate dehydrogenase [EC:1.1.1.262]	0.933333	0.0020874	Metabolism	Metabolism of cofactors and vitamins	00750 Vitamin B6 metabolism [PATH:ko00750]	1
ftsI; cell division protein FtsI (penicillin-binding protein 3) [EC:2.4.1.129]	0.933333	0.0020874	Metabolism	Glycan biosynthesis and metabolism	00550 Peptidoglycan biosynthesis [PATH:ko00550]	1
murD; UDP-N-acetylmuramoylalanine--D-glutamate ligase [EC:6.3.2.9]	0.933333	0.0020874	Metabolism	Glycan biosynthesis and metabolism	00550 Peptidoglycan biosynthesis [PATH:ko00550]	1
pncB, NAPRT1; nicotinate phosphoribosyltransferase [EC:2.4.2.11]	0.933333	0.0020874	Metabolism	Metabolism of cofactors and vitamins	00760 Nicotinate and nicotinamide metabolism [PATH:ko00760]	1
pntA; NAD(P) transhydrogenase subunit alpha [EC:1.6.1.2]	0.933333	0.0020874	Metabolism	Metabolism of cofactors and vitamins	00760 Nicotinate and nicotinamide metabolism [PATH:ko00760]	1
pntB; NAD(P) transhydrogenase subunit beta [EC:1.6.1.2]	0.933333	0.0020874	Metabolism	Metabolism of cofactors and vitamins	00760 Nicotinate and nicotinamide metabolism [PATH:ko00760]	1
fabH; 3-oxoacyl-[acyl-carrier-protein] synthase III [EC:2.3.1.180]	0.933333	0.0020874	Metabolism	Lipid metabolism	00061 Fatty acid biosynthesis [PATH:ko00061]	1
fabI; enoyl-[acyl-carrier protein] reductase I [EC:1.3.1.9 1.3.1.10]	0.933333	0.0020874	Metabolism	Lipid metabolism	00061 Fatty acid biosynthesis [PATH:ko00061]	1
E2.7.1.30, glpK; glycerol kinase [EC:2.7.1.30]	0.933333	0.0020874	Metabolism	Lipid metabolism	00561 Glycerolipid metabolism [PATH:ko00561]	1
plsX; glycerol-3-phosphate acyltransferase PlsX [EC:2.3.1.15]	0.933333	0.0020874	Metabolism	Lipid metabolism	00561 Glycerolipid metabolism [PATH:ko00561]	1
E2.7.8.5, pgsA, PGS1; CDP-diacylglycerol--glycerol-3-phosphate 3-phosphatidyltransferase [EC:2.7.8.5]	0.933333	0.0020874	Metabolism	Lipid metabolism	00564 Glycerophospholipid metabolism [PATH:ko00564]	1
tesB; acyl-CoA thioesterase II [EC:3.1.2.-]	0.933333	0.0020874	Metabolism	Lipid metabolism	01040 Biosynthesis of unsaturated fatty acids [PATH:ko01040]	1
E2.7.7.3A, coaD, kdtB; pantetheine-phosphate adenylyltransferase [EC:2.7.7.3]	0.933333	0.0020874	Metabolism	Metabolism of cofactors and vitamins	00770 Pantothenate and CoA biosynthesis [PATH:ko00770]	1
bioF; 8-amino-7-oxononanoate synthase [EC:2.3.1.47]	0.933333	0.0020874	Metabolism	Metabolism of cofactors and vitamins	00780 Biotin metabolism [PATH:ko00780]	1
chlI, bchI; magnesium chelatase subunit I [EC:6.6.1.1]	0.933333	0.0020874	Metabolism	Metabolism of cofactors and vitamins	00860 Porphyrin and chlorophyll metabolism [PATH:ko00860]	1
E2.5.1.17, cobO, btuR; cob(I)alamin adenosyltransferase [EC:2.5.1.17]	0.933333	0.0020874	Metabolism	Metabolism of cofactors and vitamins	00860 Porphyrin and chlorophyll metabolism [PATH:ko00860]	1
E6.3.5.10, cobQ, cbiP; adenosylcobyric acid synthase [EC:6.3.5.10]	0.933333	0.0020874	Metabolism	Metabolism of cofactors and vitamins	00860 Porphyrin and chlorophyll metabolism [PATH:ko00860]	1
hemC, HMBS; hydroxymethylbilane synthase [EC:2.5.1.61]	0.933333	0.0020874	Metabolism	Metabolism of cofactors and vitamins	00860 Porphyrin and chlorophyll metabolism [PATH:ko00860]	1
hemE, UROD; uroporphyrinogen decarboxylase [EC:4.1.1.37]	0.933333	0.0020874	Metabolism	Metabolism of cofactors and vitamins	00860 Porphyrin and chlorophyll metabolism [PATH:ko00860]	1
hemH, FECH; ferrochelatase [EC:4.99.1.1]	0.933333	0.0020874	Metabolism	Metabolism of cofactors and vitamins	00860 Porphyrin and chlorophyll metabolism [PATH:ko00860]	1
E6.3.2.3, gshB; glutathione synthase [EC:6.3.2.3]	0.933333	0.0020874	Metabolism	Metabolism of other amino acids	00480 Glutathione metabolism [PATH:ko00480]	1
E1.17.7.1, gcpE, ispG; (E)-4-hydroxy-3-methylbut-2-enyl-diphosphate synthase [EC:1.17.7.1]	0.933333	0.0020874	Metabolism	Metabolism of terpenoids and polyketides	00900 Terpenoid backbone biosynthesis [PATH:ko00900]	1
idi, IDI; isopentenyl-diphosphate delta-isomerase [EC:5.3.3.2]	0.933333	0.0020874	Metabolism	Metabolism of terpenoids and polyketides	00900 Terpenoid backbone biosynthesis [PATH:ko00900]	1
groEL, HSPD1; chaperonin GroEL	0.933333	0.0020874	Genetic Information Processing	Folding, sorting and degradation	03018 RNA degradation [PATH:ko03018]	1
purK; 5-(carboxyamino)imidazole ribonucleotide synthase [EC:6.3.4.18]	0.933333	0.0020874	Metabolism	Nucleotide metabolism	00230 Purine metabolism [PATH:ko00230]	1
rdgB; dITP/XTP pyrophosphatase [EC:3.6.1.19]	0.933333	0.0020874	Metabolism	Nucleotide metabolism	00230 Purine metabolism [PATH:ko00230]	1
E2.7.4.9, tmk; dTMP kinase [EC:2.7.4.9]	0.933333	0.0020874	Metabolism	Nucleotide metabolism	00240 Pyrimidine metabolism [PATH:ko00240]	1
E3.5.4.13, dcd; dCTP deaminase [EC:3.5.4.13]	0.933333	0.0020874	Metabolism	Nucleotide metabolism	00240 Pyrimidine metabolism [PATH:ko00240]	1
cheA; two-component system, chemotaxis family, sensor kinase CheA [EC:2.7.13.3]	0.933333	0.0020874	Cellular Processes	Cell motility	02030 Bacterial chemotaxis [PATH:ko02030]	1
cheB; two-component system, chemotaxis family, response regulator CheB [EC:3.1.1.61]	0.933333	0.0020874	Cellular Processes	Cell motility	02030 Bacterial chemotaxis [PATH:ko02030]	1
upp, UPRT; uracil phosphoribosyltransferase [EC:2.4.2.9]	0.933333	0.0020874	Metabolism	Nucleotide metabolism	00240 Pyrimidine metabolism [PATH:ko00240]	1
E1.14.13.22; cyclohexanone monooxygenase [EC:1.14.13.22]	0.933333	0.0020874	Metabolism	Xenobiotics biodegradation and metabolism	00930 Caprolactam degradation [PATH:ko00930]	1
rfbC; dTDP-4-dehydrorhamnose 3,5-epimerase [EC:5.1.3.13]	0.95	0.00101982	Metabolism	Biosynthesis of other secondary metabolites	00521 Streptomycin biosynthesis [PATH:ko00521]	1
ftsZ; cell division protein FtsZ	0.95	0.00101982	Cellular Processes	Cell growth and death	04112 Cell cycle - Caulobacter [PATH:ko04112]	1
menB; naphthoate synthase [EC:4.1.3.36]	0.95	0.00101982	Metabolism	Metabolism of cofactors and vitamins	00130 Ubiquinone and other terpenoid-quinone biosynthesis [PATH:ko00130]	1
bgaB, lacA; beta-galactosidase [EC:3.2.1.23]	0.95	0.00101982	Metabolism	Carbohydrate metabolism	00052 Galactose metabolism [PATH:ko00052]	1
ABC-2.AB.A; antibiotic transport system ATP-binding protein	0.95	0.00101982	Environmental Information Processing	Membrane transport	02010 ABC transporters [PATH:ko02010]	1
ABCC-BAC; ATP-binding cassette, subfamily C, bacterial	0.95	0.00101982	Environmental Information Processing	Membrane transport	02010 ABC transporters [PATH:ko02010]	1
secD; preprotein translocase subunit SecD	0.95	0.00101982	Environmental Information Processing	Membrane transport	03070 Bacterial secretion system [PATH:ko03070]	1
COX15; cytochrome c oxidase assembly protein subunit 15	0.95	0.00101982	Environmental Information Processing	Signal transduction	02020 Two-component system [PATH:ko02020]	1
nirA; ferredoxin-nitrite reductase [EC:1.7.7.1]	0.95	0.00101982	Metabolism	Energy metabolism	00910 Nitrogen metabolism [PATH:ko00910]	1
lepB; signal peptidase I [EC:3.4.21.89]	0.95	0.00101982	Genetic Information Processing	Folding, sorting and degradation	03060 Protein export [PATH:ko03060]	1
DPO3D2, holB; DNA polymerase III subunit delta' [EC:2.7.7.7]	0.95	0.00101982	Genetic Information Processing	Replication and repair	03030 DNA replication [PATH:ko03030]	1
rnhB; ribonuclease HII [EC:3.1.26.4]	0.95	0.00101982	Genetic Information Processing	Replication and repair	03030 DNA replication [PATH:ko03030]	1
recG; ATP-dependent DNA helicase RecG [EC:3.6.4.12]	0.95	0.00101982	Genetic Information Processing	Replication and repair	03440 Homologous recombination [PATH:ko03440]	1
recO; DNA repair protein RecO (recombination protein O)	0.95	0.00101982	Genetic Information Processing	Replication and repair	03440 Homologous recombination [PATH:ko03440]	1
RP-L25, rplY; large subunit ribosomal protein L25	0.95	0.00101982	Genetic Information Processing	Translation	03010 Ribosome [PATH:ko03010]	1
RP-S16, rpsP; small subunit ribosomal protein S16	0.95	0.00101982	Genetic Information Processing	Translation	03010 Ribosome [PATH:ko03010]	1
E2.2.1.6S, ilvH, ilvN; acetolactate synthase I/III small subunit [EC:2.2.1.6]	0.95	0.00101982	Metabolism	Amino acid metabolism	00290 Valine, leucine and isoleucine biosynthesis [PATH:ko00290]	1
argD; acetylornithine/N-succinyldiaminopimelate aminotransferase [EC:2.6.1.11 2.6.1.17]	0.95	0.00101982	Metabolism	Amino acid metabolism	00300 Lysine biosynthesis [PATH:ko00300]	1
E6.3.2.13, murE; UDP-N-acetylmuramoyl-L-alanyl-D-glutamate--2,6-diaminopimelate ligase [EC:6.3.2.13]	0.95	0.00101982	Metabolism	Amino acid metabolism	00300 Lysine biosynthesis [PATH:ko00300]	1
HGD, hmgA; homogentisate 1,2-dioxygenase [EC:1.13.11.5]	0.95	0.00101982	Metabolism	Amino acid metabolism	00350 Tyrosine metabolism [PATH:ko00350]	1
trpE; anthranilate synthase component I [EC:4.1.3.27]	0.95	0.00101982	Metabolism	Amino acid metabolism	00400 Phenylalanine, tyrosine and tryptophan biosynthesis [PATH:ko00400]	1
bglB; beta-glucosidase [EC:3.2.1.21]	0.95	0.00101982	Metabolism	Biosynthesis of other secondary metabolites	00940 Phenylpropanoid biosynthesis [PATH:ko00940]	1
DLAT, aceF, pdhC; pyruvate dehydrogenase E2 component (dihydrolipoamide acetyltransferase) [EC:2.3.1.12]	0.95	0.00101982	Metabolism	Carbohydrate metabolism	00010 Glycolysis / Gluconeogenesis [PATH:ko00010]	1
glpX; fructose-1,6-bisphosphatase II [EC:3.1.3.11]	0.95	0.00101982	Metabolism	Carbohydrate metabolism	00010 Glycolysis / Gluconeogenesis [PATH:ko00010]	1
PGK, pgk; phosphoglycerate kinase [EC:2.7.2.3]	0.95	0.00101982	Metabolism	Carbohydrate metabolism	00010 Glycolysis / Gluconeogenesis [PATH:ko00010]	1
E3.1.1.17; gluconolactonase [EC:3.1.1.17]	0.95	0.00101982	Metabolism	Carbohydrate metabolism	00030 Pentose phosphate pathway [PATH:ko00030]	1
E1.1.1.125, kduD; 2-deoxy-D-gluconate 3-dehydrogenase [EC:1.1.1.125]	0.95	0.00101982	Metabolism	Carbohydrate metabolism	00040 Pentose and glucuronate interconversions [PATH:ko00040]	1
UGP2, galU, galF; UTP--glucose-1-phosphate uridylyltransferase [EC:2.7.7.9]	0.95	0.00101982	Metabolism	Carbohydrate metabolism	00040 Pentose and glucuronate interconversions [PATH:ko00040]	1
malQ; 4-alpha-glucanotransferase [EC:2.4.1.25]	0.95	0.00101982	Metabolism	Carbohydrate metabolism	00500 Starch and sucrose metabolism [PATH:ko00500]	1
murB; UDP-N-acetylmuramate dehydrogenase [EC:1.1.1.158]	0.95	0.00101982	Metabolism	Carbohydrate metabolism	00520 Amino sugar and nucleotide sugar metabolism [PATH:ko00520]	1
accA; acetyl-CoA carboxylase carboxyl transferase subunit alpha [EC:6.4.1.2]	0.95	0.00101982	Metabolism	Carbohydrate metabolism	00620 Pyruvate metabolism [PATH:ko00620]	1
E3.5.1.49; formamidase [EC:3.5.1.49]	0.95	0.00101982	Metabolism	Carbohydrate metabolism	00630 Glyoxylate and dicarboxylate metabolism [PATH:ko00630]	1
nuoL; NADH-quinone oxidoreductase subunit L [EC:1.6.5.3]	0.95	0.00101982	Metabolism	Energy metabolism	00190 Oxidative phosphorylation [PATH:ko00190]	1
thiD; hydroxymethylpyrimidine/phosphomethylpyrimidine kinase [EC:2.7.1.49 2.7.4.7]	0.95	0.00101982	Metabolism	Metabolism of cofactors and vitamins	00730 Thiamine metabolism [PATH:ko00730]	1
thiE; thiamine-phosphate pyrophosphorylase [EC:2.5.1.3]	0.95	0.00101982	Metabolism	Metabolism of cofactors and vitamins	00730 Thiamine metabolism [PATH:ko00730]	1
E3.2.1.24; alpha-mannosidase [EC:3.2.1.24]	0.95	0.00101982	Metabolism	Glycan biosynthesis and metabolism	00511 Other glycan degradation [PATH:ko00511]	1
punA; purine-nucleoside phosphorylase [EC:2.4.2.1]	0.95	0.00101982	Metabolism	Metabolism of cofactors and vitamins	00760 Nicotinate and nicotinamide metabolism [PATH:ko00760]	1
plsC; 1-acyl-sn-glycerol-3-phosphate acyltransferase [EC:2.3.1.51]	0.95	0.00101982	Metabolism	Lipid metabolism	00561 Glycerolipid metabolism [PATH:ko00561]	1
gpsA; glycerol-3-phosphate dehydrogenase (NAD(P)+) [EC:1.1.1.94]	0.95	0.00101982	Metabolism	Lipid metabolism	00564 Glycerophospholipid metabolism [PATH:ko00564]	1
bioB; biotin synthase [EC:2.8.1.6]	0.95	0.00101982	Metabolism	Metabolism of cofactors and vitamins	00780 Biotin metabolism [PATH:ko00780]	1
ispF; 2-C-methyl-D-erythritol 2,4-cyclodiphosphate synthase [EC:4.6.1.12]	0.95	0.00101982	Metabolism	Metabolism of terpenoids and polyketides	00900 Terpenoid backbone biosynthesis [PATH:ko00900]	1
E3.6.1.23, dut; dUTP pyrophosphatase [EC:3.6.1.23]	0.95	0.00101982	Metabolism	Nucleotide metabolism	00240 Pyrimidine metabolism [PATH:ko00240]	1
fliC; flagellin	0.95	0.00101982	Cellular Processes	Cell motility	02040 Flagellar assembly [PATH:ko02040]	1
murF; UDP-N-acetylmuramoyl-tripeptide--D-alanyl-D-alanine ligase [EC:6.3.2.10]	0.966667	0.000334462	Metabolism	Amino acid metabolism	00300 Lysine biosynthesis [PATH:ko00300]	1
ddl; D-alanine-D-alanine ligase [EC:6.3.2.4]	0.966667	0.000334462	Metabolism	Glycan biosynthesis and metabolism	00550 Peptidoglycan biosynthesis [PATH:ko00550]	1
E2.7.7.24, rfbA, rffH; glucose-1-phosphate thymidylyltransferase [EC:2.7.7.24]	0.966667	0.000334462	Metabolism	Biosynthesis of other secondary metabolites	00521 Streptomycin biosynthesis [PATH:ko00521]	1
E4.2.1.46, rfbB, rffG; dTDP-glucose 4,6-dehydratase [EC:4.2.1.46]	0.966667	0.000334462	Metabolism	Biosynthesis of other secondary metabolites	00521 Streptomycin biosynthesis [PATH:ko00521]	1
E5.4.99.2A, mcmA1; methylmalonyl-CoA mutase, N-terminal domain [EC:5.4.99.2]	0.966667	0.000334462	Metabolism	Amino acid metabolism	00280 Valine, leucine and isoleucine degradation [PATH:ko00280]	1
clpP, CLPP; ATP-dependent Clp protease, protease subunit [EC:3.4.21.92]	0.966667	0.000334462	Cellular Processes	Cell growth and death	04112 Cell cycle - Caulobacter [PATH:ko04112]	1
clpX, CLPX; ATP-dependent Clp protease ATP-binding subunit ClpX	0.966667	0.000334462	Cellular Processes	Cell growth and death	04112 Cell cycle - Caulobacter [PATH:ko04112]	1
lon; ATP-dependent Lon protease [EC:3.4.21.53]	0.966667	0.000334462	Cellular Processes	Cell growth and death	04112 Cell cycle - Caulobacter [PATH:ko04112]	1
murG; UDP-N-acetylglucosamine--N-acetylmuramyl-(pentapeptide) pyrophosphoryl-undecaprenol N-acetylglucosamine transferase [EC:2.4.1.227]	0.966667	0.000334462	Cellular Processes	Cell growth and death	04112 Cell cycle - Caulobacter [PATH:ko04112]	1
E4.6.1.1; adenylate cyclase [EC:4.6.1.1]	0.966667	0.000334462	Cellular Processes	Cell growth and death	04113 Meiosis - yeast [PATH:ko04113]	1
sucC; succinyl-CoA synthetase beta subunit [EC:6.2.1.5]	0.966667	0.000334462	Metabolism	Carbohydrate metabolism	00020 Citrate cycle (TCA cycle) [PATH:ko00020]	1
sucD; succinyl-CoA synthetase alpha subunit [EC:6.2.1.5]	0.966667	0.000334462	Metabolism	Carbohydrate metabolism	00020 Citrate cycle (TCA cycle) [PATH:ko00020]	1
pps, ppsA; pyruvate, water dikinase [EC:2.7.9.2]	0.966667	0.000334462	Metabolism	Carbohydrate metabolism	00620 Pyruvate metabolism [PATH:ko00620]	1
cmpD; bicarbonate transport system ATP-binding protein [EC:3.6.3.-]	0.966667	0.000334462	Environmental Information Processing	Membrane transport	02010 ABC transporters [PATH:ko02010]	1
E2.3.1.9, atoB; acetyl-CoA C-acetyltransferase [EC:2.3.1.9]	0.966667	0.000334462	Environmental Information Processing	Signal transduction	02020 Two-component system [PATH:ko02020]	1
ACSL, fadD; long-chain acyl-CoA synthetase [EC:6.2.1.3]	0.966667	0.000334462	Cellular Processes	Transport and catabolism	04146 Peroxisome [PATH:ko04146]	1
MUT; methylmalonyl-CoA mutase [EC:5.4.99.2]	0.966667	0.000334462	Metabolism	Amino acid metabolism	00280 Valine, leucine and isoleucine degradation [PATH:ko00280]	1
E4.1.3.4, HMGCL, hmgL; hydroxymethylglutaryl-CoA lyase [EC:4.1.3.4]	0.966667	0.000334462	Cellular Processes	Transport and catabolism	04146 Peroxisome [PATH:ko04146]	1
ABC.PE.A; peptide/nickel transport system ATP-binding protein	0.966667	0.000334462	Environmental Information Processing	Membrane transport	02010 ABC transporters [PATH:ko02010]	1
ABC.PE.P; peptide/nickel transport system permease protein	0.966667	0.000334462	Environmental Information Processing	Membrane transport	02010 ABC transporters [PATH:ko02010]	1
ABC.PE.P1; peptide/nickel transport system permease protein	0.966667	0.000334462	Environmental Information Processing	Membrane transport	02010 ABC transporters [PATH:ko02010]	1
ABC.PE.S; peptide/nickel transport system substrate-binding protein	0.966667	0.000334462	Environmental Information Processing	Membrane transport	02010 ABC transporters [PATH:ko02010]	1
ABC.SN.P, ssuC, tauC; sulfonate/nitrate/taurine transport system permease protein	0.966667	0.000334462	Environmental Information Processing	Membrane transport	02010 ABC transporters [PATH:ko02010]	1
ABC.SN.S, ssuA, tauA; sulfonate/nitrate/taurine transport system substrate-binding protein	0.966667	0.000334462	Environmental Information Processing	Membrane transport	02010 ABC transporters [PATH:ko02010]	1
ABC-2.AB.P; antibiotic transport system permease protein	0.966667	0.000334462	Environmental Information Processing	Membrane transport	02010 ABC transporters [PATH:ko02010]	1
ABC-2.LPSE.A; lipopolysaccharide transport system ATP-binding protein	0.966667	0.000334462	Environmental Information Processing	Membrane transport	02010 ABC transporters [PATH:ko02010]	1
afuA, fbpA; iron(III) transport system substrate-binding protein	0.966667	0.000334462	Environmental Information Processing	Membrane transport	02010 ABC transporters [PATH:ko02010]	1
afuB, fbpB; iron(III) transport system permease protein	0.966667	0.000334462	Environmental Information Processing	Membrane transport	02010 ABC transporters [PATH:ko02010]	1
afuC, fbpC; iron(III) transport system ATP-binding protein [EC:3.6.3.30]	0.966667	0.000334462	Environmental Information Processing	Membrane transport	02010 ABC transporters [PATH:ko02010]	1
dppF; dipeptide transport system ATP-binding protein	0.966667	0.000334462	Environmental Information Processing	Membrane transport	02010 ABC transporters [PATH:ko02010]	1
ftsE; cell division transport system ATP-binding protein	0.966667	0.000334462	Environmental Information Processing	Membrane transport	02010 ABC transporters [PATH:ko02010]	1
livF; branched-chain amino acid transport system ATP-binding protein	0.966667	0.000334462	Environmental Information Processing	Membrane transport	02010 ABC transporters [PATH:ko02010]	1
livG; branched-chain amino acid transport system ATP-binding protein	0.966667	0.000334462	Environmental Information Processing	Membrane transport	02010 ABC transporters [PATH:ko02010]	1
livH; branched-chain amino acid transport system permease protein	0.966667	0.000334462	Environmental Information Processing	Membrane transport	02010 ABC transporters [PATH:ko02010]	1
livK; branched-chain amino acid transport system substrate-binding protein	0.966667	0.000334462	Environmental Information Processing	Membrane transport	02010 ABC transporters [PATH:ko02010]	1
livM; branched-chain amino acid transport system permease protein	0.966667	0.000334462	Environmental Information Processing	Membrane transport	02010 ABC transporters [PATH:ko02010]	1
ftsY; fused signal recognition particle receptor	0.966667	0.000334462	Environmental Information Processing	Membrane transport	03070 Bacterial secretion system [PATH:ko03070]	1
secA; preprotein translocase subunit SecA	0.966667	0.000334462	Environmental Information Processing	Membrane transport	03070 Bacterial secretion system [PATH:ko03070]	1
proW; glycine betaine/proline transport system permease protein	0.966667	0.000334462	Environmental Information Processing	Membrane transport	02010 ABC transporters [PATH:ko02010]	1
secF; preprotein translocase subunit SecF	0.966667	0.000334462	Environmental Information Processing	Membrane transport	03070 Bacterial secretion system [PATH:ko03070]	1
pstA; phosphate transport system permease protein	0.966667	0.000334462	Environmental Information Processing	Membrane transport	02010 ABC transporters [PATH:ko02010]	1
secY; preprotein translocase subunit SecY	0.966667	0.000334462	Environmental Information Processing	Membrane transport	03070 Bacterial secretion system [PATH:ko03070]	1
SRP54, ffh; signal recognition particle subunit SRP54	0.966667	0.000334462	Environmental Information Processing	Membrane transport	03070 Bacterial secretion system [PATH:ko03070]	1
rbsA; ribose transport system ATP-binding protein [EC:3.6.3.17]	0.966667	0.000334462	Environmental Information Processing	Membrane transport	02010 ABC transporters [PATH:ko02010]	1
rbsC; ribose transport system permease protein	0.966667	0.000334462	Environmental Information Processing	Membrane transport	02010 ABC transporters [PATH:ko02010]	1
cydA; cytochrome d ubiquinol oxidase subunit I [EC:1.10.3.-]	0.966667	0.000334462	Environmental Information Processing	Signal transduction	02020 Two-component system [PATH:ko02020]	1
gspE; general secretion pathway protein E	0.966667	0.000334462	Environmental Information Processing	Membrane transport	03070 Bacterial secretion system [PATH:ko03070]	1
E1.1.1.38, sfcA, maeA; malate dehydrogenase (oxaloacetate-decarboxylating) [EC:1.1.1.38]	0.966667	0.000334462	Environmental Information Processing	Signal transduction	02020 Two-component system [PATH:ko02020]	1
glnA; glutamine synthetase [EC:6.3.1.2]	0.966667	0.000334462	Environmental Information Processing	Signal transduction	02020 Two-component system [PATH:ko02020]	1
E3.1.3.25, IMPA, suhB; myo-inositol-1(or 4)-monophosphatase [EC:3.1.3.25]	0.966667	0.000334462	Environmental Information Processing	Signal transduction	04070 Phosphatidylinositol signaling system [PATH:ko04070]	1
deaD; ATP-dependent RNA helicase DeaD [EC:3.6.4.13]	0.966667	0.000334462	Genetic Information Processing	Folding, sorting and degradation	03018 RNA degradation [PATH:ko03018]	1
dnaK; molecular chaperone DnaK	0.966667	0.000334462	Genetic Information Processing	Folding, sorting and degradation	03018 RNA degradation [PATH:ko03018]	1
pnp, PNPT1; polyribonucleotide nucleotidyltransferase [EC:2.7.7.8]	0.966667	0.000334462	Genetic Information Processing	Folding, sorting and degradation	03018 RNA degradation [PATH:ko03018]	1
ppk; polyphosphate kinase [EC:2.7.4.1]	0.966667	0.000334462	Genetic Information Processing	Folding, sorting and degradation	03018 RNA degradation [PATH:ko03018]	1
recQ; ATP-dependent DNA helicase RecQ [EC:3.6.4.12]	0.966667	0.000334462	Genetic Information Processing	Folding, sorting and degradation	03018 RNA degradation [PATH:ko03018]	1
rho; transcription termination factor Rho	0.966667	0.000334462	Genetic Information Processing	Folding, sorting and degradation	03018 RNA degradation [PATH:ko03018]	1
rne; ribonuclease E [EC:3.1.26.12]	0.966667	0.000334462	Genetic Information Processing	Folding, sorting and degradation	03018 RNA degradation [PATH:ko03018]	1
lspA; signal peptidase II [EC:3.4.23.36]	0.966667	0.000334462	Genetic Information Processing	Folding, sorting and degradation	03060 Protein export [PATH:ko03060]	1
mnmA, trmU, TRMU; tRNA-specific 2-thiouridylase [EC:2.8.1.-]	0.966667	0.000334462	Genetic Information Processing	Folding, sorting and degradation	04122 Sulfur relay system [PATH:ko04122]	1
moaC; molybdenum cofactor biosynthesis protein C	0.966667	0.000334462	Genetic Information Processing	Folding, sorting and degradation	04122 Sulfur relay system [PATH:ko04122]	1
MOCS1, moaA; molybdenum cofactor biosynthesis protein	0.966667	0.000334462	Genetic Information Processing	Folding, sorting and degradation	04122 Sulfur relay system [PATH:ko04122]	1
MOCS3, UBA4, moeB; adenylyltransferase and sulfurtransferase	0.966667	0.000334462	Genetic Information Processing	Folding, sorting and degradation	04122 Sulfur relay system [PATH:ko04122]	1
TST, MPST, sseA; thiosulfate/3-mercaptopyruvate sulfurtransferase [EC:2.8.1.1 2.8.1.2]	0.966667	0.000334462	Genetic Information Processing	Folding, sorting and degradation	04122 Sulfur relay system [PATH:ko04122]	1
VCP, CDC48; transitional endoplasmic reticulum ATPase	0.966667	0.000334462	Genetic Information Processing	Folding, sorting and degradation	04141 Protein processing in endoplasmic reticulum [PATH:ko04141]	1
dnaG; DNA primase [EC:2.7.7.-]	0.966667	0.000334462	Genetic Information Processing	Replication and repair	03030 DNA replication [PATH:ko03030]	1
DPO1, polA; DNA polymerase I [EC:2.7.7.7]	0.966667	0.000334462	Genetic Information Processing	Replication and repair	03030 DNA replication [PATH:ko03030]	1
DPO3A1, dnaE; DNA polymerase III subunit alpha [EC:2.7.7.7]	0.966667	0.000334462	Genetic Information Processing	Replication and repair	03030 DNA replication [PATH:ko03030]	1
DPO3B, dnaN; DNA polymerase III subunit beta [EC:2.7.7.7]	0.966667	0.000334462	Genetic Information Processing	Replication and repair	03030 DNA replication [PATH:ko03030]	1
DPO3G, dnaX; DNA polymerase III subunit gamma/tau [EC:2.7.7.7]	0.966667	0.000334462	Genetic Information Processing	Replication and repair	03030 DNA replication [PATH:ko03030]	1
E6.5.1.2, ligA, ligB; DNA ligase (NAD+) [EC:6.5.1.2]	0.966667	0.000334462	Genetic Information Processing	Replication and repair	03030 DNA replication [PATH:ko03030]	1
ssb; single-strand DNA-binding protein	0.966667	0.000334462	Genetic Information Processing	Replication and repair	03030 DNA replication [PATH:ko03030]	1
uvrB; excinuclease ABC subunit B	0.966667	0.000334462	Genetic Information Processing	Replication and repair	03420 Nucleotide excision repair [PATH:ko03420]	1
uvrC; excinuclease ABC subunit C	0.966667	0.000334462	Genetic Information Processing	Replication and repair	03420 Nucleotide excision repair [PATH:ko03420]	1
uvrD, pcrA; DNA helicase II / ATP-dependent DNA helicase PcrA [EC:3.6.4.12]	0.966667	0.000334462	Genetic Information Processing	Replication and repair	03420 Nucleotide excision repair [PATH:ko03420]	1
priA; primosomal protein N' (replication factor Y) (superfamily II helicase) [EC:3.6.4.-]	0.966667	0.000334462	Genetic Information Processing	Replication and repair	03440 Homologous recombination [PATH:ko03440]	1
recF; DNA replication and repair protein RecF	0.966667	0.000334462	Genetic Information Processing	Replication and repair	03440 Homologous recombination [PATH:ko03440]	1
recR; recombination protein RecR	0.966667	0.000334462	Genetic Information Processing	Replication and repair	03440 Homologous recombination [PATH:ko03440]	1
ruvB; holliday junction DNA helicase RuvB [EC:3.6.4.12]	0.966667	0.000334462	Genetic Information Processing	Replication and repair	03440 Homologous recombination [PATH:ko03440]	1
rpoB; DNA-directed RNA polymerase subunit beta [EC:2.7.7.6]	0.966667	0.000334462	Genetic Information Processing	Transcription	03020 RNA polymerase [PATH:ko03020]	1
rpoC; DNA-directed RNA polymerase subunit beta' [EC:2.7.7.6]	0.966667	0.000334462	Genetic Information Processing	Transcription	03020 RNA polymerase [PATH:ko03020]	1
AARS, alaS; alanyl-tRNA synthetase [EC:6.1.1.7]	0.966667	0.000334462	Genetic Information Processing	Translation	00970 Aminoacyl-tRNA biosynthesis [PATH:ko00970]	1
CARS, cysS; cysteinyl-tRNA synthetase [EC:6.1.1.16]	0.966667	0.000334462	Genetic Information Processing	Translation	00970 Aminoacyl-tRNA biosynthesis [PATH:ko00970]	1
EARS, gltX; glutamyl-tRNA synthetase [EC:6.1.1.17]	0.966667	0.000334462	Genetic Information Processing	Translation	00970 Aminoacyl-tRNA biosynthesis [PATH:ko00970]	1
FARSA, pheS; phenylalanyl-tRNA synthetase alpha chain [EC:6.1.1.20]	0.966667	0.000334462	Genetic Information Processing	Translation	00970 Aminoacyl-tRNA biosynthesis [PATH:ko00970]	1
FARSB, pheT; phenylalanyl-tRNA synthetase beta chain [EC:6.1.1.20]	0.966667	0.000334462	Genetic Information Processing	Translation	00970 Aminoacyl-tRNA biosynthesis [PATH:ko00970]	1
GARS, glyS1; glycyl-tRNA synthetase [EC:6.1.1.14]	0.966667	0.000334462	Genetic Information Processing	Translation	00970 Aminoacyl-tRNA biosynthesis [PATH:ko00970]	1
gatA; aspartyl-tRNA(Asn)/glutamyl-tRNA (Gln) amidotransferase subunit A [EC:6.3.5.6 6.3.5.7]	0.966667	0.000334462	Genetic Information Processing	Translation	00970 Aminoacyl-tRNA biosynthesis [PATH:ko00970]	1
gatB; aspartyl-tRNA(Asn)/glutamyl-tRNA (Gln) amidotransferase subunit B [EC:6.3.5.6 6.3.5.7]	0.966667	0.000334462	Genetic Information Processing	Translation	00970 Aminoacyl-tRNA biosynthesis [PATH:ko00970]	1
IARS, ileS; isoleucyl-tRNA synthetase [EC:6.1.1.5]	0.966667	0.000334462	Genetic Information Processing	Translation	00970 Aminoacyl-tRNA biosynthesis [PATH:ko00970]	1
LARS, leuS; leucyl-tRNA synthetase [EC:6.1.1.4]	0.966667	0.000334462	Genetic Information Processing	Translation	00970 Aminoacyl-tRNA biosynthesis [PATH:ko00970]	1
lysK; lysyl-tRNA synthetase, class I [EC:6.1.1.6]	0.966667	0.000334462	Genetic Information Processing	Translation	00970 Aminoacyl-tRNA biosynthesis [PATH:ko00970]	1
MARS, metG; methionyl-tRNA synthetase [EC:6.1.1.10]	0.966667	0.000334462	Genetic Information Processing	Translation	00970 Aminoacyl-tRNA biosynthesis [PATH:ko00970]	1
PARS, proS; prolyl-tRNA synthetase [EC:6.1.1.15]	0.966667	0.000334462	Genetic Information Processing	Translation	00970 Aminoacyl-tRNA biosynthesis [PATH:ko00970]	1
SARS, serS; seryl-tRNA synthetase [EC:6.1.1.11]	0.966667	0.000334462	Genetic Information Processing	Translation	00970 Aminoacyl-tRNA biosynthesis [PATH:ko00970]	1
VARS, valS; valyl-tRNA synthetase [EC:6.1.1.9]	0.966667	0.000334462	Genetic Information Processing	Translation	00970 Aminoacyl-tRNA biosynthesis [PATH:ko00970]	1
WARS, trpS; tryptophanyl-tRNA synthetase [EC:6.1.1.2]	0.966667	0.000334462	Genetic Information Processing	Translation	00970 Aminoacyl-tRNA biosynthesis [PATH:ko00970]	1
YARS, tyrS; tyrosyl-tRNA synthetase [EC:6.1.1.1]	0.966667	0.000334462	Genetic Information Processing	Translation	00970 Aminoacyl-tRNA biosynthesis [PATH:ko00970]	1
RP-L1, rplA; large subunit ribosomal protein L1	0.966667	0.000334462	Genetic Information Processing	Translation	03010 Ribosome [PATH:ko03010]	1
RP-L11, rplK; large subunit ribosomal protein L11	0.966667	0.000334462	Genetic Information Processing	Translation	03010 Ribosome [PATH:ko03010]	1
RP-L17, rplQ; large subunit ribosomal protein L17	0.966667	0.000334462	Genetic Information Processing	Translation	03010 Ribosome [PATH:ko03010]	1
RP-L23, rplW; large subunit ribosomal protein L23	0.966667	0.000334462	Genetic Information Processing	Translation	03010 Ribosome [PATH:ko03010]	1
RP-L5, rplE; large subunit ribosomal protein L5	0.966667	0.000334462	Genetic Information Processing	Translation	03010 Ribosome [PATH:ko03010]	1
RP-L6, rplF; large subunit ribosomal protein L6	0.966667	0.000334462	Genetic Information Processing	Translation	03010 Ribosome [PATH:ko03010]	1
RP-S14, rpsN; small subunit ribosomal protein S14	0.966667	0.000334462	Genetic Information Processing	Translation	03010 Ribosome [PATH:ko03010]	1
RP-S19, rpsS; small subunit ribosomal protein S19	0.966667	0.000334462	Genetic Information Processing	Translation	03010 Ribosome [PATH:ko03010]	1
RP-S2, rpsB; small subunit ribosomal protein S2	0.966667	0.000334462	Genetic Information Processing	Translation	03010 Ribosome [PATH:ko03010]	1
RP-S5, rpsE; small subunit ribosomal protein S5	0.966667	0.000334462	Genetic Information Processing	Translation	03010 Ribosome [PATH:ko03010]	1
RP-S9, rpsI; small subunit ribosomal protein S9	0.966667	0.000334462	Genetic Information Processing	Translation	03010 Ribosome [PATH:ko03010]	1
ald; alanine dehydrogenase [EC:1.4.1.1]	0.966667	0.000334462	Metabolism	Amino acid metabolism	00250 Alanine, aspartate and glutamate metabolism [PATH:ko00250]	1
argH, ASL; argininosuccinate lyase [EC:4.3.2.1]	0.966667	0.000334462	Metabolism	Amino acid metabolism	00250 Alanine, aspartate and glutamate metabolism [PATH:ko00250]	1
carA, CPA1; carbamoyl-phosphate synthase small subunit [EC:6.3.5.5]	0.966667	0.000334462	Metabolism	Amino acid metabolism	00250 Alanine, aspartate and glutamate metabolism [PATH:ko00250]	1
carB, CPA2; carbamoyl-phosphate synthase large subunit [EC:6.3.5.5]	0.966667	0.000334462	Metabolism	Amino acid metabolism	00250 Alanine, aspartate and glutamate metabolism [PATH:ko00250]	1
E1.2.1.16, gabD; succinate-semialdehyde dehydrogenase (NADP+) [EC:1.2.1.16]	0.966667	0.000334462	Metabolism	Amino acid metabolism	00250 Alanine, aspartate and glutamate metabolism [PATH:ko00250]	1
E1.5.1.12; 1-pyrroline-5-carboxylate dehydrogenase [EC:1.5.1.12]	0.966667	0.000334462	Metabolism	Amino acid metabolism	00250 Alanine, aspartate and glutamate metabolism [PATH:ko00250]	1
E2.4.2.14, purF; amidophosphoribosyltransferase [EC:2.4.2.14]	0.966667	0.000334462	Metabolism	Amino acid metabolism	00250 Alanine, aspartate and glutamate metabolism [PATH:ko00250]	1
E2.6.1.16, glmS; glucosamine--fructose-6-phosphate aminotransferase (isomerizing) [EC:2.6.1.16]	0.966667	0.000334462	Metabolism	Amino acid metabolism	00250 Alanine, aspartate and glutamate metabolism [PATH:ko00250]	1
E6.3.4.4, purA; adenylosuccinate synthase [EC:6.3.4.4]	0.966667	0.000334462	Metabolism	Amino acid metabolism	00250 Alanine, aspartate and glutamate metabolism [PATH:ko00250]	1
gltB; glutamate synthase (NADPH/NADH) large chain [EC:1.4.1.13 1.4.1.14]	0.966667	0.000334462	Metabolism	Amino acid metabolism	00250 Alanine, aspartate and glutamate metabolism [PATH:ko00250]	1
gltD; glutamate synthase (NADPH/NADH) small chain [EC:1.4.1.13 1.4.1.14]	0.966667	0.000334462	Metabolism	Amino acid metabolism	00250 Alanine, aspartate and glutamate metabolism [PATH:ko00250]	1
gudB, rocG; glutamate dehydrogenase [EC:1.4.1.2]	0.966667	0.000334462	Metabolism	Amino acid metabolism	00250 Alanine, aspartate and glutamate metabolism [PATH:ko00250]	1
nadB; L-aspartate oxidase [EC:1.4.3.16]	0.966667	0.000334462	Metabolism	Amino acid metabolism	00250 Alanine, aspartate and glutamate metabolism [PATH:ko00250]	1
pyrB, PYR2; aspartate carbamoyltransferase catalytic subunit [EC:2.1.3.2]	0.966667	0.000334462	Metabolism	Amino acid metabolism	00250 Alanine, aspartate and glutamate metabolism [PATH:ko00250]	1
asd; aspartate-semialdehyde dehydrogenase [EC:1.2.1.11]	0.966667	0.000334462	Metabolism	Amino acid metabolism	00260 Glycine, serine and threonine metabolism [PATH:ko00260]	1
betB, gbsA; betaine-aldehyde dehydrogenase [EC:1.2.1.8]	0.966667	0.000334462	Metabolism	Amino acid metabolism	00260 Glycine, serine and threonine metabolism [PATH:ko00260]	1
DLD, lpd, pdhD; dihydrolipoamide dehydrogenase [EC:1.8.1.4]	0.966667	0.000334462	Metabolism	Amino acid metabolism	00260 Glycine, serine and threonine metabolism [PATH:ko00260]	1
E2.7.2.4, lysC; aspartate kinase [EC:2.7.2.4]	0.966667	0.000334462	Metabolism	Amino acid metabolism	00260 Glycine, serine and threonine metabolism [PATH:ko00260]	1
E4.3.1.19, ilvA, tdcB; threonine dehydratase [EC:4.3.1.19]	0.966667	0.000334462	Metabolism	Amino acid metabolism	00260 Glycine, serine and threonine metabolism [PATH:ko00260]	1
gcvPA; glycine dehydrogenase subunit 1 [EC:1.4.4.2]	0.966667	0.000334462	Metabolism	Amino acid metabolism	00260 Glycine, serine and threonine metabolism [PATH:ko00260]	1
gcvPB; glycine dehydrogenase subunit 2 [EC:1.4.4.2]	0.966667	0.000334462	Metabolism	Amino acid metabolism	00260 Glycine, serine and threonine metabolism [PATH:ko00260]	1
gcvT, AMT; aminomethyltransferase [EC:2.1.2.10]	0.966667	0.000334462	Metabolism	Amino acid metabolism	00260 Glycine, serine and threonine metabolism [PATH:ko00260]	1
gpmA, PGAM; 2,3-bisphosphoglycerate-dependent phosphoglycerate mutase [EC:5.4.2.1]	0.966667	0.000334462	Metabolism	Amino acid metabolism	00260 Glycine, serine and threonine metabolism [PATH:ko00260]	1
ltaE; threonine aldolase [EC:4.1.2.5]	0.966667	0.000334462	Metabolism	Amino acid metabolism	00260 Glycine, serine and threonine metabolism [PATH:ko00260]	1
serA, PHGDH; D-3-phosphoglycerate dehydrogenase [EC:1.1.1.95]	0.966667	0.000334462	Metabolism	Amino acid metabolism	00260 Glycine, serine and threonine metabolism [PATH:ko00260]	1
serB, PSPH; phosphoserine phosphatase [EC:3.1.3.3]	0.966667	0.000334462	Metabolism	Amino acid metabolism	00260 Glycine, serine and threonine metabolism [PATH:ko00260]	1
serC, PSAT1; phosphoserine aminotransferase [EC:2.6.1.52]	0.966667	0.000334462	Metabolism	Amino acid metabolism	00260 Glycine, serine and threonine metabolism [PATH:ko00260]	1
thrC; threonine synthase [EC:4.2.3.1]	0.966667	0.000334462	Metabolism	Amino acid metabolism	00260 Glycine, serine and threonine metabolism [PATH:ko00260]	1
trpA; tryptophan synthase alpha chain [EC:4.2.1.20]	0.966667	0.000334462	Metabolism	Amino acid metabolism	00260 Glycine, serine and threonine metabolism [PATH:ko00260]	1
trpB; tryptophan synthase beta chain [EC:4.2.1.20]	0.966667	0.000334462	Metabolism	Amino acid metabolism	00260 Glycine, serine and threonine metabolism [PATH:ko00260]	1
cysM; cysteine synthase B [EC:2.5.1.47]	0.966667	0.000334462	Metabolism	Amino acid metabolism	00270 Cysteine and methionine metabolism [PATH:ko00270]	1
E2.1.1.13, metH; 5-methyltetrahydrofolate--homocysteine methyltransferase [EC:2.1.1.13]	0.966667	0.000334462	Metabolism	Amino acid metabolism	00270 Cysteine and methionine metabolism [PATH:ko00270]	1
E2.3.1.31, metX; homoserine O-acetyltransferase [EC:2.3.1.31]	0.966667	0.000334462	Metabolism	Amino acid metabolism	00270 Cysteine and methionine metabolism [PATH:ko00270]	1
E2.5.1.6, metK; S-adenosylmethionine synthetase [EC:2.5.1.6]	0.966667	0.000334462	Metabolism	Amino acid metabolism	00270 Cysteine and methionine metabolism [PATH:ko00270]	1
E3.3.1.1, ahcY; adenosylhomocysteinase [EC:3.3.1.1]	0.966667	0.000334462	Metabolism	Amino acid metabolism	00270 Cysteine and methionine metabolism [PATH:ko00270]	1
ACADS, bcd; butyryl-CoA dehydrogenase [EC:1.3.8.1]	0.966667	0.000334462	Metabolism	Amino acid metabolism	00280 Valine, leucine and isoleucine degradation [PATH:ko00280]	1
E1.2.1.3; aldehyde dehydrogenase (NAD+) [EC:1.2.1.3]	0.966667	0.000334462	Metabolism	Amino acid metabolism	00280 Valine, leucine and isoleucine degradation [PATH:ko00280]	1
E2.3.1.16, fadA; acetyl-CoA acyltransferase [EC:2.3.1.16]	0.966667	0.000334462	Metabolism	Amino acid metabolism	00280 Valine, leucine and isoleucine degradation [PATH:ko00280]	1
E2.6.1.42, ilvE; branched-chain amino acid aminotransferase [EC:2.6.1.42]	0.966667	0.000334462	Metabolism	Amino acid metabolism	00280 Valine, leucine and isoleucine degradation [PATH:ko00280]	1
E6.4.1.4B; 3-methylcrotonyl-CoA carboxylase beta subunit [EC:6.4.1.4]	0.966667	0.000334462	Metabolism	Amino acid metabolism	00280 Valine, leucine and isoleucine degradation [PATH:ko00280]	1
paaF, echA; enoyl-CoA hydratase [EC:4.2.1.17]	0.966667	0.000334462	Metabolism	Amino acid metabolism	00280 Valine, leucine and isoleucine degradation [PATH:ko00280]	1
PCCA, pccA; propionyl-CoA carboxylase alpha chain [EC:6.4.1.3]	0.966667	0.000334462	Metabolism	Amino acid metabolism	00280 Valine, leucine and isoleucine degradation [PATH:ko00280]	1
PCCB, pccB; propionyl-CoA carboxylase beta chain [EC:6.4.1.3]	0.966667	0.000334462	Metabolism	Amino acid metabolism	00280 Valine, leucine and isoleucine degradation [PATH:ko00280]	1
E2.2.1.6L, ilvB, ilvG, ilvI; acetolactate synthase I/II/III large subunit [EC:2.2.1.6]	0.966667	0.000334462	Metabolism	Amino acid metabolism	00290 Valine, leucine and isoleucine biosynthesis [PATH:ko00290]	1
ilvC; ketol-acid reductoisomerase [EC:1.1.1.86]	0.966667	0.000334462	Metabolism	Amino acid metabolism	00290 Valine, leucine and isoleucine biosynthesis [PATH:ko00290]	1
ilvD; dihydroxy-acid dehydratase [EC:4.2.1.9]	0.966667	0.000334462	Metabolism	Amino acid metabolism	00290 Valine, leucine and isoleucine biosynthesis [PATH:ko00290]	1
leuA; 2-isopropylmalate synthase [EC:2.3.3.13]	0.966667	0.000334462	Metabolism	Amino acid metabolism	00290 Valine, leucine and isoleucine biosynthesis [PATH:ko00290]	1
leuC; 3-isopropylmalate/(R)-2-methylmalate dehydratase large subunit [EC:4.2.1.33 4.2.1.35]	0.966667	0.000334462	Metabolism	Amino acid metabolism	00290 Valine, leucine and isoleucine biosynthesis [PATH:ko00290]	1
ACO, acnA; aconitate hydratase 1 / homoaconitase [EC:4.2.1.3 4.2.1.-]	0.966667	0.000334462	Metabolism	Amino acid metabolism	00300 Lysine biosynthesis [PATH:ko00300]	1
dapA; 4-hydroxy-tetrahydrodipicolinate synthase [EC:4.3.3.7]	0.966667	0.000334462	Metabolism	Amino acid metabolism	00300 Lysine biosynthesis [PATH:ko00300]	1
lysA; diaminopimelate decarboxylase [EC:4.1.1.20]	0.966667	0.000334462	Metabolism	Amino acid metabolism	00300 Lysine biosynthesis [PATH:ko00300]	1
E3.4.-.-; [EC:3.4.-.-]	0.966667	0.000334462	Metabolism	Amino acid metabolism	00310 Lysine degradation [PATH:ko00310]	1
GCDH, gcdH; glutaryl-CoA dehydrogenase [EC:1.3.8.6]	0.966667	0.000334462	Metabolism	Amino acid metabolism	00310 Lysine degradation [PATH:ko00310]	1
OGDH, sucA; 2-oxoglutarate dehydrogenase E1 component [EC:1.2.4.2]	0.966667	0.000334462	Metabolism	Amino acid metabolism	00310 Lysine degradation [PATH:ko00310]	1
argC; N-acetyl-gamma-glutamyl-phosphate reductase [EC:1.2.1.38]	0.966667	0.000334462	Metabolism	Amino acid metabolism	00330 Arginine and proline metabolism [PATH:ko00330]	1
argE; acetylornithine deacetylase [EC:3.5.1.16]	0.966667	0.000334462	Metabolism	Amino acid metabolism	00330 Arginine and proline metabolism [PATH:ko00330]	1
argJ; glutamate N-acetyltransferase / amino-acid N-acetyltransferase [EC:2.3.1.35 2.3.1.1]	0.966667	0.000334462	Metabolism	Amino acid metabolism	00330 Arginine and proline metabolism [PATH:ko00330]	1
E2.6.1.11, argD; acetylornithine aminotransferase [EC:2.6.1.11]	0.966667	0.000334462	Metabolism	Amino acid metabolism	00330 Arginine and proline metabolism [PATH:ko00330]	1
E3.5.1.4, amiE; amidase [EC:3.5.1.4]	0.966667	0.000334462	Metabolism	Amino acid metabolism	00330 Arginine and proline metabolism [PATH:ko00330]	1
E3.5.4.1, codA; cytosine deaminase [EC:3.5.4.1]	0.966667	0.000334462	Metabolism	Amino acid metabolism	00330 Arginine and proline metabolism [PATH:ko00330]	1
hyuB; N-methylhydantoinase B [EC:3.5.2.14]	0.966667	0.000334462	Metabolism	Amino acid metabolism	00330 Arginine and proline metabolism [PATH:ko00330]	1
lysJ; acetylornithine/acetyl-lysine aminotransferase [EC:2.6.1.11 2.6.1.-]	0.966667	0.000334462	Metabolism	Amino acid metabolism	00330 Arginine and proline metabolism [PATH:ko00330]	1
OTC, argF, argI; ornithine carbamoyltransferase [EC:2.1.3.3]	0.966667	0.000334462	Metabolism	Amino acid metabolism	00330 Arginine and proline metabolism [PATH:ko00330]	1
E3.5.2.7, hutI; imidazolonepropionase [EC:3.5.2.7]	0.966667	0.000334462	Metabolism	Amino acid metabolism	00340 Histidine metabolism [PATH:ko00340]	1
hisD; histidinol dehydrogenase [EC:1.1.1.23]	0.966667	0.000334462	Metabolism	Amino acid metabolism	00340 Histidine metabolism [PATH:ko00340]	1
hisF; cyclase [EC:4.1.3.-]	0.966667	0.000334462	Metabolism	Amino acid metabolism	00340 Histidine metabolism [PATH:ko00340]	1
hutH, HAL; histidine ammonia-lyase [EC:4.3.1.3]	0.966667	0.000334462	Metabolism	Amino acid metabolism	00340 Histidine metabolism [PATH:ko00340]	1
E1.1.1.1, adh; alcohol dehydrogenase [EC:1.1.1.1]	0.966667	0.000334462	Metabolism	Amino acid metabolism	00350 Tyrosine metabolism [PATH:ko00350]	1
hipO; hippurate hydrolase [EC:3.5.1.32]	0.966667	0.000334462	Metabolism	Amino acid metabolism	00360 Phenylalanine metabolism [PATH:ko00360]	1
katG; catalase-peroxidase [EC:1.11.1.21]	0.966667	0.000334462	Metabolism	Amino acid metabolism	00360 Phenylalanine metabolism [PATH:ko00360]	1
aroC; chorismate synthase [EC:4.2.3.5]	0.966667	0.000334462	Metabolism	Amino acid metabolism	00400 Phenylalanine, tyrosine and tryptophan biosynthesis [PATH:ko00400]	1
aroE; shikimate dehydrogenase [EC:1.1.1.25]	0.966667	0.000334462	Metabolism	Amino acid metabolism	00400 Phenylalanine, tyrosine and tryptophan biosynthesis [PATH:ko00400]	1
pheA2; prephenate dehydratase [EC:4.2.1.51]	0.966667	0.000334462	Metabolism	Amino acid metabolism	00400 Phenylalanine, tyrosine and tryptophan biosynthesis [PATH:ko00400]	1
trpC; indole-3-glycerol phosphate synthase [EC:4.1.1.48]	0.966667	0.000334462	Metabolism	Amino acid metabolism	00400 Phenylalanine, tyrosine and tryptophan biosynthesis [PATH:ko00400]	1
trpD; anthranilate phosphoribosyltransferase [EC:2.4.2.18]	0.966667	0.000334462	Metabolism	Amino acid metabolism	00400 Phenylalanine, tyrosine and tryptophan biosynthesis [PATH:ko00400]	1
trpF; phosphoribosylanthranilate isomerase [EC:5.3.1.24]	0.966667	0.000334462	Metabolism	Amino acid metabolism	00400 Phenylalanine, tyrosine and tryptophan biosynthesis [PATH:ko00400]	1
E1.14.-.-; [EC:1.14.-.-]	0.966667	0.000334462	Metabolism	Biosynthesis of other secondary metabolites	00945 Stilbenoid, diarylheptanoid and gingerol biosynthesis [PATH:ko00945]	1
aceE; pyruvate dehydrogenase E1 component [EC:1.2.4.1]	0.966667	0.000334462	Metabolism	Carbohydrate metabolism	00010 Glycolysis / Gluconeogenesis [PATH:ko00010]	1
ACSS, acs; acetyl-CoA synthetase [EC:6.2.1.1]	0.966667	0.000334462	Metabolism	Carbohydrate metabolism	00010 Glycolysis / Gluconeogenesis [PATH:ko00010]	1
GPI, pgi; glucose-6-phosphate isomerase [EC:5.3.1.9]	0.966667	0.000334462	Metabolism	Carbohydrate metabolism	00010 Glycolysis / Gluconeogenesis [PATH:ko00010]	1
pfkA, PFK; 6-phosphofructokinase 1 [EC:2.7.1.11]	0.966667	0.000334462	Metabolism	Carbohydrate metabolism	00010 Glycolysis / Gluconeogenesis [PATH:ko00010]	1
TPI, tpiA; triosephosphate isomerase (TIM) [EC:5.3.1.1]	0.966667	0.000334462	Metabolism	Carbohydrate metabolism	00010 Glycolysis / Gluconeogenesis [PATH:ko00010]	1
CS, gltA; citrate synthase [EC:2.3.3.1]	0.966667	0.000334462	Metabolism	Carbohydrate metabolism	00020 Citrate cycle (TCA cycle) [PATH:ko00020]	1
korA; 2-oxoglutarate ferredoxin oxidoreductase subunit alpha [EC:1.2.7.3]	0.966667	0.000334462	Metabolism	Carbohydrate metabolism	00020 Citrate cycle (TCA cycle) [PATH:ko00020]	1
korB; 2-oxoglutarate ferredoxin oxidoreductase subunit beta [EC:1.2.7.3]	0.966667	0.000334462	Metabolism	Carbohydrate metabolism	00020 Citrate cycle (TCA cycle) [PATH:ko00020]	1
cysD; sulfate adenylyltransferase subunit 2 [EC:2.7.7.4]	0.966667	0.000334462	Metabolism	Energy metabolism	00920 Sulfur metabolism [PATH:ko00920]	1
cysN; sulfate adenylyltransferase subunit 1 [EC:2.7.7.4]	0.966667	0.000334462	Metabolism	Energy metabolism	00920 Sulfur metabolism [PATH:ko00920]	1
E1.1.1.44, PGD, gnd; 6-phosphogluconate dehydrogenase [EC:1.1.1.44]	0.966667	0.000334462	Metabolism	Carbohydrate metabolism	00030 Pentose phosphate pathway [PATH:ko00030]	1
cysNC; bifunctional enzyme CysN/CysC [EC:2.7.7.4 2.7.1.25]	0.966667	0.000334462	Metabolism	Energy metabolism	00920 Sulfur metabolism [PATH:ko00920]	1
E2.2.1.1, tktA, tktB; transketolase [EC:2.2.1.1]	0.966667	0.000334462	Metabolism	Carbohydrate metabolism	00030 Pentose phosphate pathway [PATH:ko00030]	1
E2.2.1.2, talA, talB; transaldolase [EC:2.2.1.2]	0.966667	0.000334462	Metabolism	Carbohydrate metabolism	00030 Pentose phosphate pathway [PATH:ko00030]	1
G6PD, zwf; glucose-6-phosphate 1-dehydrogenase [EC:1.1.1.49]	0.966667	0.000334462	Metabolism	Carbohydrate metabolism	00030 Pentose phosphate pathway [PATH:ko00030]	1
PGLS, pgl, devB; 6-phosphogluconolactonase [EC:3.1.1.31]	0.966667	0.000334462	Metabolism	Carbohydrate metabolism	00030 Pentose phosphate pathway [PATH:ko00030]	1
rpiB; ribose 5-phosphate isomerase B [EC:5.3.1.6]	0.966667	0.000334462	Metabolism	Carbohydrate metabolism	00030 Pentose phosphate pathway [PATH:ko00030]	1
E2.7.1.17; xylulokinase [EC:2.7.1.17]	0.966667	0.000334462	Metabolism	Carbohydrate metabolism	00040 Pentose and glucuronate interconversions [PATH:ko00040]	1
UGDH, ugd; UDPglucose 6-dehydrogenase [EC:1.1.1.22]	0.966667	0.000334462	Metabolism	Carbohydrate metabolism	00040 Pentose and glucuronate interconversions [PATH:ko00040]	1
E5.4.2.8, manB; phosphomannomutase [EC:5.4.2.8]	0.966667	0.000334462	Metabolism	Carbohydrate metabolism	00051 Fructose and mannose metabolism [PATH:ko00051]	1
E3.2.1.20, malZ; alpha-glucosidase [EC:3.2.1.20]	0.966667	0.000334462	Metabolism	Carbohydrate metabolism	00052 Galactose metabolism [PATH:ko00052]	1
galE, GALE; UDP-glucose 4-epimerase [EC:5.1.3.2]	0.966667	0.000334462	Metabolism	Carbohydrate metabolism	00052 Galactose metabolism [PATH:ko00052]	1
galK; galactokinase [EC:2.7.1.6]	0.966667	0.000334462	Metabolism	Carbohydrate metabolism	00052 Galactose metabolism [PATH:ko00052]	1
E2.4.1.1, glgP, PYG; starch phosphorylase [EC:2.4.1.1]	0.966667	0.000334462	Metabolism	Carbohydrate metabolism	00500 Starch and sucrose metabolism [PATH:ko00500]	1
glgB; 1,4-alpha-glucan branching enzyme [EC:2.4.1.18]	0.966667	0.000334462	Metabolism	Carbohydrate metabolism	00500 Starch and sucrose metabolism [PATH:ko00500]	1
treS; maltose alpha-D-glucosyltransferase/ alpha-amylase [EC:5.4.99.16 3.2.1.1]	0.966667	0.000334462	Metabolism	Carbohydrate metabolism	00500 Starch and sucrose metabolism [PATH:ko00500]	1
glmU; bifunctional UDP-N-acetylglucosamine pyrophosphorylase / Glucosamine-1-phosphate N-acetyltransferase [EC:2.7.7.23 2.3.1.157]	0.966667	0.000334462	Metabolism	Carbohydrate metabolism	00520 Amino sugar and nucleotide sugar metabolism [PATH:ko00520]	1
iolD; 3D-(3,5/4)-trihydroxycyclohexane-1,2-dione hydrolase [EC:3.7.1.-]	0.966667	0.000334462	Metabolism	Carbohydrate metabolism	00562 Inositol phosphate metabolism [PATH:ko00562]	1
accD; acetyl-CoA carboxylase carboxyl transferase subunit beta [EC:6.4.1.2]	0.966667	0.000334462	Metabolism	Carbohydrate metabolism	00620 Pyruvate metabolism [PATH:ko00620]	1
E1.1.2.4, dld; D-lactate dehydrogenase (cytochrome) [EC:1.1.2.4]	0.966667	0.000334462	Metabolism	Carbohydrate metabolism	00620 Pyruvate metabolism [PATH:ko00620]	1
E2.3.3.9, aceB, glcB; malate synthase [EC:2.3.3.9]	0.966667	0.000334462	Metabolism	Carbohydrate metabolism	00620 Pyruvate metabolism [PATH:ko00620]	1
ppdK; pyruvate,orthophosphate dikinase [EC:2.7.9.1]	0.966667	0.000334462	Metabolism	Carbohydrate metabolism	00620 Pyruvate metabolism [PATH:ko00620]	1
E6.5.1.1, lig; DNA ligase (ATP) [EC:6.5.1.1]	0.966667	0.000334462	Genetic Information Processing	Replication and repair	03410 Base excision repair [PATH:ko03410]	1
E1.2.1.2A; formate dehydrogenase, alpha subunit [EC:1.2.1.2]	0.966667	0.000334462	Metabolism	Carbohydrate metabolism	00630 Glyoxylate and dicarboxylate metabolism [PATH:ko00630]	1
E1.2.1.2B1; formate dehydrogenase, beta subunit	0.966667	0.000334462	Metabolism	Carbohydrate metabolism	00630 Glyoxylate and dicarboxylate metabolism [PATH:ko00630]	1
E1.4.7.1; glutamate synthase (ferredoxin) [EC:1.4.7.1]	0.966667	0.000334462	Metabolism	Carbohydrate metabolism	00630 Glyoxylate and dicarboxylate metabolism [PATH:ko00630]	1
ecm; (2R)-ethylmalonyl-CoA mutase	0.966667	0.000334462	Metabolism	Carbohydrate metabolism	00630 Glyoxylate and dicarboxylate metabolism [PATH:ko00630]	1
FDH; formate dehydrogenase [EC:1.2.1.2]	0.966667	0.000334462	Metabolism	Carbohydrate metabolism	00630 Glyoxylate and dicarboxylate metabolism [PATH:ko00630]	1
gyaR; glyoxylate reductase [EC:1.1.1.26]	0.966667	0.000334462	Metabolism	Carbohydrate metabolism	00630 Glyoxylate and dicarboxylate metabolism [PATH:ko00630]	1
purU; formyltetrahydrofolate deformylase [EC:3.5.1.10]	0.966667	0.000334462	Metabolism	Carbohydrate metabolism	00630 Glyoxylate and dicarboxylate metabolism [PATH:ko00630]	1
phbC, phaC; polyhydroxyalkanoate synthase [EC:2.3.1.-]	0.966667	0.000334462	Metabolism	Carbohydrate metabolism	00650 Butanoate metabolism [PATH:ko00650]	1
ATPF0C, atpE; F-type H+-transporting ATPase subunit c [EC:3.6.3.14]	0.966667	0.000334462	Metabolism	Energy metabolism	00190 Oxidative phosphorylation [PATH:ko00190]	1
ATPF1A, atpA; F-type H+-transporting ATPase subunit alpha [EC:3.6.3.14]	0.966667	0.000334462	Metabolism	Energy metabolism	00190 Oxidative phosphorylation [PATH:ko00190]	1
ATPF1B, atpD; F-type H+-transporting ATPase subunit beta [EC:3.6.3.14]	0.966667	0.000334462	Metabolism	Energy metabolism	00190 Oxidative phosphorylation [PATH:ko00190]	1
ATPF1G, atpG; F-type H+-transporting ATPase subunit gamma [EC:3.6.3.14]	0.966667	0.000334462	Metabolism	Energy metabolism	00190 Oxidative phosphorylation [PATH:ko00190]	1
ubiE; ubiquinone/menaquinone biosynthesis methyltransferase [EC:2.1.1.163 2.1.1.201]	0.966667	0.000334462	Metabolism	Metabolism of cofactors and vitamins	00130 Ubiquinone and other terpenoid-quinone biosynthesis [PATH:ko00130]	1
cyoE; protoheme IX farnesyltransferase [EC:2.5.1.-]	0.966667	0.000334462	Metabolism	Energy metabolism	00190 Oxidative phosphorylation [PATH:ko00190]	1
nuoC; NADH-quinone oxidoreductase subunit C [EC:1.6.5.3]	0.966667	0.000334462	Metabolism	Energy metabolism	00190 Oxidative phosphorylation [PATH:ko00190]	1
nuoD; NADH-quinone oxidoreductase subunit D [EC:1.6.5.3]	0.966667	0.000334462	Metabolism	Energy metabolism	00190 Oxidative phosphorylation [PATH:ko00190]	1
nuoG; NADH-quinone oxidoreductase subunit G [EC:1.6.5.3]	0.966667	0.000334462	Metabolism	Energy metabolism	00190 Oxidative phosphorylation [PATH:ko00190]	1
nuoJ; NADH-quinone oxidoreductase subunit J [EC:1.6.5.3]	0.966667	0.000334462	Metabolism	Energy metabolism	00190 Oxidative phosphorylation [PATH:ko00190]	1
ppa; inorganic pyrophosphatase [EC:3.6.1.1]	0.966667	0.000334462	Metabolism	Energy metabolism	00190 Oxidative phosphorylation [PATH:ko00190]	1
E1.2.99.2L, cutL, coxL; carbon-monoxide dehydrogenase large subunit [EC:1.2.99.2]	0.966667	0.000334462	Metabolism	Energy metabolism	00680 Methane metabolism [PATH:ko00680]	1
E1.2.99.2S, coxS; carbon-monoxide dehydrogenase small subunit [EC:1.2.99.2]	0.966667	0.000334462	Metabolism	Energy metabolism	00680 Methane metabolism [PATH:ko00680]	1
E1.5.1.20, metF; methylenetetrahydrofolate reductase (NADPH) [EC:1.5.1.20]	0.966667	0.000334462	Metabolism	Energy metabolism	00680 Methane metabolism [PATH:ko00680]	1
purH; phosphoribosylaminoimidazolecarboxamide formyltransferase / IMP cyclohydrolase [EC:2.1.2.3 3.5.4.10]	0.966667	0.000334462	Metabolism	Metabolism of cofactors and vitamins	00670 One carbon pool by folate [PATH:ko00670]	1
purN; phosphoribosylglycinamide formyltransferase 1 [EC:2.1.2.2]	0.966667	0.000334462	Metabolism	Metabolism of cofactors and vitamins	00670 One carbon pool by folate [PATH:ko00670]	1
sufS; cysteine desulfurase / selenocysteine lyase [EC:2.8.1.7 4.4.1.16]	0.966667	0.000334462	Metabolism	Metabolism of cofactors and vitamins	00730 Thiamine metabolism [PATH:ko00730]	1
thiG; thiamine biosynthesis ThiG	0.966667	0.000334462	Metabolism	Metabolism of cofactors and vitamins	00730 Thiamine metabolism [PATH:ko00730]	1
nhaA; Na+:H+ antiporter, NhaA family	0.966667	0.000334462	Metabolism	Energy metabolism	00680 Methane metabolism [PATH:ko00680]	1
folD; methylenetetrahydrofolate dehydrogenase (NADP+) / methenyltetrahydrofolate cyclohydrolase [EC:1.5.1.5 3.5.4.9]	0.966667	0.000334462	Metabolism	Energy metabolism	00720 Carbon fixation pathways in prokaryotes [PATH:ko00720]	1
pstS; phosphate transport system substrate-binding protein	0.966667	0.000334462	Environmental Information Processing	Membrane transport	02010 ABC transporters [PATH:ko02010]	1
ribB, RIB3; 3,4-dihydroxy 2-butanone 4-phosphate synthase [EC:4.1.99.12]	0.966667	0.000334462	Metabolism	Metabolism of cofactors and vitamins	00740 Riboflavin metabolism [PATH:ko00740]	1
ribD; diaminohydroxyphosphoribosylaminopyrimidine deaminase / 5-amino-6-(5-phosphoribosylamino)uracil reductase [EC:3.5.4.26 1.1.1.193]	0.966667	0.000334462	Metabolism	Metabolism of cofactors and vitamins	00740 Riboflavin metabolism [PATH:ko00740]	1
cysH; phosphoadenosine phosphosulfate reductase [EC:1.8.4.8]	0.966667	0.000334462	Metabolism	Energy metabolism	00920 Sulfur metabolism [PATH:ko00920]	1
ribE, RIB5; riboflavin synthase [EC:2.5.1.9]	0.966667	0.000334462	Metabolism	Metabolism of cofactors and vitamins	00740 Riboflavin metabolism [PATH:ko00740]	1
E2.7.7.4C, met3; sulfate adenylyltransferase [EC:2.7.7.4]	0.966667	0.000334462	Metabolism	Energy metabolism	00920 Sulfur metabolism [PATH:ko00920]	1
DPM1; dolichol-phosphate mannosyltransferase [EC:2.4.1.83]	0.966667	0.000334462	Metabolism	Glycan biosynthesis and metabolism	00510 N-Glycan biosynthesis [PATH:ko00510]	1
pdxS, pdx1; pyridoxine biosynthesis protein [EC:4.-.-.-]	0.966667	0.000334462	Metabolism	Metabolism of cofactors and vitamins	00750 Vitamin B6 metabolism [PATH:ko00750]	1
gmhA, lpcA; D-sedoheptulose 7-phosphate isomerase [EC:5.3.1.28]	0.966667	0.000334462	Metabolism	Glycan biosynthesis and metabolism	00540 Lipopolysaccharide biosynthesis [PATH:ko00540]	1
E3.1.3.5; 5'-nucleotidase [EC:3.1.3.5]	0.966667	0.000334462	Metabolism	Metabolism of cofactors and vitamins	00760 Nicotinate and nicotinamide metabolism [PATH:ko00760]	1
E6.3.5.1, NADSYN1, QNS1, nadE; NAD+ synthase (glutamine-hydrolysing) [EC:6.3.5.1]	0.966667	0.000334462	Metabolism	Metabolism of cofactors and vitamins	00760 Nicotinate and nicotinamide metabolism [PATH:ko00760]	1
nadA; quinolinate synthase [EC:2.5.1.72]	0.966667	0.000334462	Metabolism	Metabolism of cofactors and vitamins	00760 Nicotinate and nicotinamide metabolism [PATH:ko00760]	1
nadC, QPRT; nicotinate-nucleotide pyrophosphorylase (carboxylating) [EC:2.4.2.19]	0.966667	0.000334462	Metabolism	Metabolism of cofactors and vitamins	00760 Nicotinate and nicotinamide metabolism [PATH:ko00760]	1
E3.6.1.27, bacA; undecaprenyl-diphosphatase [EC:3.6.1.27]	0.966667	0.000334462	Metabolism	Glycan biosynthesis and metabolism	00550 Peptidoglycan biosynthesis [PATH:ko00550]	1
mrdA; penicillin-binding protein 2	0.966667	0.000334462	Metabolism	Glycan biosynthesis and metabolism	00550 Peptidoglycan biosynthesis [PATH:ko00550]	1
nadD; nicotinate-nucleotide adenylyltransferase [EC:2.7.7.18]	0.966667	0.000334462	Metabolism	Metabolism of cofactors and vitamins	00760 Nicotinate and nicotinamide metabolism [PATH:ko00760]	1
murC; UDP-N-acetylmuramate--alanine ligase [EC:6.3.2.8]	0.966667	0.000334462	Metabolism	Glycan biosynthesis and metabolism	00550 Peptidoglycan biosynthesis [PATH:ko00550]	1
mviN; virulence factor	0.966667	0.000334462	Metabolism	Glycan biosynthesis and metabolism	00550 Peptidoglycan biosynthesis [PATH:ko00550]	1
ppnK, NADK; NAD+ kinase [EC:2.7.1.23]	0.966667	0.000334462	Metabolism	Metabolism of cofactors and vitamins	00760 Nicotinate and nicotinamide metabolism [PATH:ko00760]	1
fabD; [acyl-carrier-protein] S-malonyltransferase [EC:2.3.1.39]	0.966667	0.000334462	Metabolism	Lipid metabolism	00061 Fatty acid biosynthesis [PATH:ko00061]	1
fabF; 3-oxoacyl-[acyl-carrier-protein] synthase II [EC:2.3.1.179]	0.966667	0.000334462	Metabolism	Lipid metabolism	00061 Fatty acid biosynthesis [PATH:ko00061]	1
fabG; 3-oxoacyl-[acyl-carrier protein] reductase [EC:1.1.1.100]	0.966667	0.000334462	Metabolism	Lipid metabolism	00061 Fatty acid biosynthesis [PATH:ko00061]	1
E3.1.4.46, glpQ, ugpQ; glycerophosphoryl diester phosphodiesterase [EC:3.1.4.46]	0.966667	0.000334462	Metabolism	Lipid metabolism	00564 Glycerophospholipid metabolism [PATH:ko00564]	1
glpA, glpD; glycerol-3-phosphate dehydrogenase [EC:1.1.5.3]	0.966667	0.000334462	Metabolism	Lipid metabolism	00564 Glycerophospholipid metabolism [PATH:ko00564]	1
ggt; gamma-glutamyltranspeptidase [EC:2.3.2.2]	0.966667	0.000334462	Metabolism	Lipid metabolism	00590 Arachidonic acid metabolism [PATH:ko00590]	1
SCD, desC; stearoyl-CoA desaturase (delta-9 desaturase) [EC:1.14.19.1]	0.966667	0.000334462	Metabolism	Lipid metabolism	01040 Biosynthesis of unsaturated fatty acids [PATH:ko01040]	1
coaBC, dfp; phosphopantothenoylcysteine decarboxylase / phosphopantothenate--cysteine ligase [EC:4.1.1.36 6.3.2.5]	0.966667	0.000334462	Metabolism	Metabolism of cofactors and vitamins	00770 Pantothenate and CoA biosynthesis [PATH:ko00770]	1
coaE; dephospho-CoA kinase [EC:2.7.1.24]	0.966667	0.000334462	Metabolism	Metabolism of cofactors and vitamins	00770 Pantothenate and CoA biosynthesis [PATH:ko00770]	1
coaX; type III pantothenate kinase [EC:2.7.1.33]	0.966667	0.000334462	Metabolism	Metabolism of cofactors and vitamins	00770 Pantothenate and CoA biosynthesis [PATH:ko00770]	1
E3.5.2.2, DPYS; dihydropyrimidinase [EC:3.5.2.2]	0.966667	0.000334462	Metabolism	Metabolism of cofactors and vitamins	00770 Pantothenate and CoA biosynthesis [PATH:ko00770]	1
panB; 3-methyl-2-oxobutanoate hydroxymethyltransferase [EC:2.1.2.11]	0.966667	0.000334462	Metabolism	Metabolism of cofactors and vitamins	00770 Pantothenate and CoA biosynthesis [PATH:ko00770]	1
panC; pantoate--beta-alanine ligase [EC:6.3.2.1]	0.966667	0.000334462	Metabolism	Metabolism of cofactors and vitamins	00770 Pantothenate and CoA biosynthesis [PATH:ko00770]	1
lipB; lipoyl(octanoyl) transferase [EC:2.3.1.181]	0.966667	0.000334462	Metabolism	Metabolism of cofactors and vitamins	00785 Lipoic acid metabolism [PATH:ko00785]	1
folC; dihydrofolate synthase / folylpolyglutamate synthase [EC:6.3.2.12 6.3.2.17]	0.966667	0.000334462	Metabolism	Metabolism of cofactors and vitamins	00790 Folate biosynthesis [PATH:ko00790]	1
folP; dihydropteroate synthase [EC:2.5.1.15]	0.966667	0.000334462	Metabolism	Metabolism of cofactors and vitamins	00790 Folate biosynthesis [PATH:ko00790]	1
cobN; cobaltochelatase CobN [EC:6.6.1.2]	0.966667	0.000334462	Metabolism	Metabolism of cofactors and vitamins	00860 Porphyrin and chlorophyll metabolism [PATH:ko00860]	1
hemA; glutamyl-tRNA reductase [EC:1.2.1.70]	0.966667	0.000334462	Metabolism	Metabolism of cofactors and vitamins	00860 Porphyrin and chlorophyll metabolism [PATH:ko00860]	1
hemB, ALAD; porphobilinogen synthase [EC:4.2.1.24]	0.966667	0.000334462	Metabolism	Metabolism of cofactors and vitamins	00860 Porphyrin and chlorophyll metabolism [PATH:ko00860]	1
hemL; glutamate-1-semialdehyde 2,1-aminomutase [EC:5.4.3.8]	0.966667	0.000334462	Metabolism	Metabolism of cofactors and vitamins	00860 Porphyrin and chlorophyll metabolism [PATH:ko00860]	1
hemN, hemZ; oxygen-independent coproporphyrinogen III oxidase [EC:1.3.99.22]	0.966667	0.000334462	Metabolism	Metabolism of cofactors and vitamins	00860 Porphyrin and chlorophyll metabolism [PATH:ko00860]	1
E1.1.99.-; [EC:1.1.99.-]	0.966667	0.000334462	Metabolism	Metabolism of other amino acids	00440 Phosphonate and phosphinate metabolism [PATH:ko00440]	1
E1.8.1.9, trxB; thioredoxin reductase (NADPH) [EC:1.8.1.9]	0.966667	0.000334462	Metabolism	Metabolism of other amino acids	00450 Selenocompound metabolism [PATH:ko00450]	1
selD, SEPHS; selenide, water dikinase [EC:2.7.9.3]	0.966667	0.000334462	Metabolism	Metabolism of other amino acids	00450 Selenocompound metabolism [PATH:ko00450]	1
CARP, pepA; leucyl aminopeptidase [EC:3.4.11.1]	0.966667	0.000334462	Metabolism	Metabolism of other amino acids	00480 Glutathione metabolism [PATH:ko00480]	1
pepN; aminopeptidase N [EC:3.4.11.2]	0.966667	0.000334462	Metabolism	Metabolism of other amino acids	00480 Glutathione metabolism [PATH:ko00480]	1
E1.3.99.-; [EC:1.3.99.-]	0.966667	0.000334462	Metabolism	Metabolism of terpenoids and polyketides	00281 Geraniol degradation [PATH:ko00281]	1
dxr; 1-deoxy-D-xylulose-5-phosphate reductoisomerase [EC:1.1.1.267]	0.966667	0.000334462	Metabolism	Metabolism of terpenoids and polyketides	00900 Terpenoid backbone biosynthesis [PATH:ko00900]	1
E1.17.1.2, lytB, ispH; 4-hydroxy-3-methylbut-2-enyl diphosphate reductase [EC:1.17.1.2]	0.966667	0.000334462	Metabolism	Metabolism of terpenoids and polyketides	00900 Terpenoid backbone biosynthesis [PATH:ko00900]	1
ispE; 4-diphosphocytidyl-2-C-methyl-D-erythritol kinase [EC:2.7.1.148]	0.966667	0.000334462	Metabolism	Metabolism of terpenoids and polyketides	00900 Terpenoid backbone biosynthesis [PATH:ko00900]	1
uppS; undecaprenyl diphosphate synthase [EC:2.5.1.31]	0.966667	0.000334462	Metabolism	Metabolism of terpenoids and polyketides	00900 Terpenoid backbone biosynthesis [PATH:ko00900]	1
crtI; phytoene desaturase [EC:1.3.99.26 1.3.99.28 1.3.99.29 1.3.99.31]	0.966667	0.000334462	Metabolism	Metabolism of terpenoids and polyketides	00906 Carotenoid biosynthesis [PATH:ko00906]	1
dgt; dGTPase [EC:3.1.5.1]	0.966667	0.000334462	Metabolism	Nucleotide metabolism	00230 Purine metabolism [PATH:ko00230]	1
E1.1.1.205, guaB; IMP dehydrogenase [EC:1.1.1.205]	0.966667	0.000334462	Metabolism	Nucleotide metabolism	00230 Purine metabolism [PATH:ko00230]	1
E1.17.4.1A, nrdA, nrdE; ribonucleoside-diphosphate reductase alpha chain [EC:1.17.4.1]	0.966667	0.000334462	Metabolism	Nucleotide metabolism	00230 Purine metabolism [PATH:ko00230]	1
E2.7.4.3, adk; adenylate kinase [EC:2.7.4.3]	0.966667	0.000334462	Metabolism	Nucleotide metabolism	00230 Purine metabolism [PATH:ko00230]	1
E2.7.4.6, ndk; nucleoside-diphosphate kinase [EC:2.7.4.6]	0.966667	0.000334462	Metabolism	Nucleotide metabolism	00230 Purine metabolism [PATH:ko00230]	1
E6.3.5.2, guaA; GMP synthase (glutamine-hydrolysing) [EC:6.3.5.2]	0.966667	0.000334462	Metabolism	Nucleotide metabolism	00230 Purine metabolism [PATH:ko00230]	1
E6.3.5.3, purL; phosphoribosylformylglycinamidine synthase [EC:6.3.5.3]	0.966667	0.000334462	Metabolism	Nucleotide metabolism	00230 Purine metabolism [PATH:ko00230]	1
hprT, hpt, HPRT1; hypoxanthine phosphoribosyltransferase [EC:2.4.2.8]	0.966667	0.000334462	Metabolism	Nucleotide metabolism	00230 Purine metabolism [PATH:ko00230]	1
purC; phosphoribosylaminoimidazole-succinocarboxamide synthase [EC:6.3.2.6]	0.966667	0.000334462	Metabolism	Nucleotide metabolism	00230 Purine metabolism [PATH:ko00230]	1
uvrA; excinuclease ABC subunit A	0.966667	0.000334462	Genetic Information Processing	Replication and repair	03420 Nucleotide excision repair [PATH:ko03420]	1
purD; phosphoribosylamine--glycine ligase [EC:6.3.4.13]	0.966667	0.000334462	Metabolism	Nucleotide metabolism	00230 Purine metabolism [PATH:ko00230]	1
purE; 5-(carboxyamino)imidazole ribonucleotide mutase [EC:5.4.99.18]	0.966667	0.000334462	Metabolism	Nucleotide metabolism	00230 Purine metabolism [PATH:ko00230]	1
purM; phosphoribosylformylglycinamidine cyclo-ligase [EC:6.3.3.1]	0.966667	0.000334462	Metabolism	Nucleotide metabolism	00230 Purine metabolism [PATH:ko00230]	1
xdhB; xanthine dehydrogenase large subunit [EC:1.17.1.4]	0.966667	0.000334462	Metabolism	Nucleotide metabolism	00230 Purine metabolism [PATH:ko00230]	1
cmk; cytidylate kinase [EC:2.7.4.14]	0.966667	0.000334462	Metabolism	Nucleotide metabolism	00240 Pyrimidine metabolism [PATH:ko00240]	1
E2.7.1.21, tdk; thymidine kinase [EC:2.7.1.21]	0.966667	0.000334462	Metabolism	Nucleotide metabolism	00240 Pyrimidine metabolism [PATH:ko00240]	1
E6.3.4.2, pyrG; CTP synthase [EC:6.3.4.2]	0.966667	0.000334462	Metabolism	Nucleotide metabolism	00240 Pyrimidine metabolism [PATH:ko00240]	1
pyrE; orotate phosphoribosyltransferase [EC:2.4.2.10]	0.966667	0.000334462	Metabolism	Nucleotide metabolism	00240 Pyrimidine metabolism [PATH:ko00240]	1
pyrF; orotidine-5'-phosphate decarboxylase [EC:4.1.1.23]	0.966667	0.000334462	Metabolism	Nucleotide metabolism	00240 Pyrimidine metabolism [PATH:ko00240]	1
pyrH; uridylate kinase [EC:2.7.4.22]	0.966667	0.000334462	Metabolism	Nucleotide metabolism	00240 Pyrimidine metabolism [PATH:ko00240]	1
URA4, pyrC; dihydroorotase [EC:3.5.2.3]	0.966667	0.000334462	Metabolism	Nucleotide metabolism	00240 Pyrimidine metabolism [PATH:ko00240]	1
flhA; flagellar biosynthesis protein FlhA	0.966667	0.000334462	Cellular Processes	Cell motility	02040 Flagellar assembly [PATH:ko02040]	1
fliA; RNA polymerase sigma factor for flagellar operon FliA	0.966667	0.000334462	Genetic Information Processing	Transcription	03020 RNA polymerase [PATH:ko03020]	1
E5.1.99.4, AMACR, mcr; alpha-methylacyl-CoA racemase [EC:5.1.99.4]	0.983333	5.01129e-05	Cellular Processes	Transport and catabolism	04146 Peroxisome [PATH:ko04146]	1
phoD; alkaline phosphatase D [EC:3.1.3.1]	0.983333	5.01129e-05	Environmental Information Processing	Signal transduction	02020 Two-component system [PATH:ko02020]	1
ERCC3, XPB; DNA excision repair protein ERCC-3 [EC:3.6.4.12]	0.983333	5.01129e-05	Genetic Information Processing	Replication and repair	03420 Nucleotide excision repair [PATH:ko03420]	1
RP-S8, rpsH; small subunit ribosomal protein S8	0.983333	5.01129e-05	Genetic Information Processing	Translation	03010 Ribosome [PATH:ko03010]	1
soxB; sarcosine oxidase, subunit beta [EC:1.5.3.1]	0.983333	5.01129e-05	Metabolism	Amino acid metabolism	00260 Glycine, serine and threonine metabolism [PATH:ko00260]	1
mmsA, iolA, ALDH6A1; malonate-semialdehyde dehydrogenase (acetylating) / methylmalonate-semialdehyde dehydrogenase [EC:1.2.1.18 1.2.1.27]	0.983333	5.01129e-05	Metabolism	Amino acid metabolism	00280 Valine, leucine and isoleucine degradation [PATH:ko00280]	1
proB; glutamate 5-kinase [EC:2.7.2.11]	0.983333	5.01129e-05	Metabolism	Amino acid metabolism	00330 Arginine and proline metabolism [PATH:ko00330]	1
ALDO; fructose-bisphosphate aldolase, class I [EC:4.1.2.13]	0.983333	5.01129e-05	Metabolism	Carbohydrate metabolism	00010 Glycolysis / Gluconeogenesis [PATH:ko00010]	1
ubiG; 2-polyprenyl-6-hydroxyphenyl methylase / 3-demethylubiquinone-9 3-methyltransferase [EC:2.1.1.222 2.1.1.64]	0.983333	5.01129e-05	Metabolism	Metabolism of cofactors and vitamins	00130 Ubiquinone and other terpenoid-quinone biosynthesis [PATH:ko00130]	1
nuoB; NADH-quinone oxidoreductase subunit B [EC:1.6.5.3]	0.983333	5.01129e-05	Metabolism	Energy metabolism	00190 Oxidative phosphorylation [PATH:ko00190]	1
ABC.SX.P, cysT; putative sulfate transport system permease protein	0.766667	0.0476383	Environmental Information Processing	Membrane transport	02010 ABC transporters [PATH:ko02010]	2
natE; neutral amino acid transport system ATP-binding protein	0.766667	0.0476383	Environmental Information Processing	Membrane transport	02010 ABC transporters [PATH:ko02010]	2
vasD, lip; type VI secretion system protein VasD	0.766667	0.0476383	Environmental Information Processing	Membrane transport	03070 Bacterial secretion system [PATH:ko03070]	2
rpfG; two-component system, response regulator RpfG	0.766667	0.0476383	Environmental Information Processing	Signal transduction	02020 Two-component system [PATH:ko02020]	2
acdH; short/branched chain acyl-CoA dehydrogenase [EC:1.3.99.12]	0.766667	0.0476383	Metabolism	Amino acid metabolism	00280 Valine, leucine and isoleucine degradation [PATH:ko00280]	2
K11646; dehydroquinate synthase II [EC:1.4.1.-]	0.766667	0.0476383	Metabolism	Amino acid metabolism	00400 Phenylalanine, tyrosine and tryptophan biosynthesis [PATH:ko00400]	2
HST; homogentisate solanesyltransferase	0.766667	0.0476383	Metabolism	Metabolism of cofactors and vitamins	00130 Ubiquinone and other terpenoid-quinone biosynthesis [PATH:ko00130]	2
cbiT; cobalt-precorrin-7 (C15)-methyltransferase [EC:2.1.1.196]	0.766667	0.0476383	Metabolism	Metabolism of cofactors and vitamins	00860 Porphyrin and chlorophyll metabolism [PATH:ko00860]	2
crtF; demethylspheroidene O-methyltransferase [EC:2.1.1.210]	0.766667	0.0476383	Metabolism	Metabolism of terpenoids and polyketides	00906 Carotenoid biosynthesis [PATH:ko00906]	2
DHODH; dihydroorotate dehydrogenase [EC:1.3.5.2]	0.766667	0.0476383	Metabolism	Nucleotide metabolism	00240 Pyrimidine metabolism [PATH:ko00240]	2
E4.2.1.2AB, fumB; fumarate hydratase subunit beta [EC:4.2.1.2]	0.783333	0.0397463	Metabolism	Carbohydrate metabolism	00020 Citrate cycle (TCA cycle) [PATH:ko00020]	2
rhaS1; rhamnose transport system substrate-binding protein	0.783333	0.0397463	Environmental Information Processing	Membrane transport	02010 ABC transporters [PATH:ko02010]	2
hydH, zraS; two-component system, NtrC family, sensor histidine kinase HydH [EC:2.7.13.3]	0.783333	0.0397463	Environmental Information Processing	Signal transduction	02020 Two-component system [PATH:ko02020]	2
luxO; two-component system, repressor protein LuxO	0.783333	0.0397463	Environmental Information Processing	Signal transduction	02020 Two-component system [PATH:ko02020]	2
astC; succinylornithine aminotransferase [EC:2.6.1.81]	0.783333	0.0397463	Metabolism	Amino acid metabolism	00330 Arginine and proline metabolism [PATH:ko00330]	2
E5.1.3.7, wbpP; UDP-N-acetylglucosamine 4-epimerase [EC:5.1.3.7]	0.783333	0.0397463	Metabolism	Carbohydrate metabolism	00520 Amino sugar and nucleotide sugar metabolism [PATH:ko00520]	2
amoB; ammonia monooxygenase subunit B	0.783333	0.0397463	Metabolism	Energy metabolism	00910 Nitrogen metabolism [PATH:ko00910]	2
FAD8, desB; omega-3 fatty acid desaturase (delta-15 desaturase) [EC:1.14.19.-]	0.783333	0.0397463	Metabolism	Lipid metabolism	01040 Biosynthesis of unsaturated fatty acids [PATH:ko01040]	2
bchC; 3-hydroxyethyl bacteriochlorophyllide a dehydrogenase [EC:1.-.-.-]	0.783333	0.0397463	Metabolism	Metabolism of cofactors and vitamins	00860 Porphyrin and chlorophyll metabolism [PATH:ko00860]	2
mcr; malonyl-CoA reductase / 3-hydroxypropionate dehydrogenase (NADP+) [EC:1.2.1.75 1.1.1.298]	0.8	0.0326626	Metabolism	Energy metabolism	00720 Carbon fixation pathways in prokaryotes [PATH:ko00720]	2
AP2B1; AP-2 complex subunit beta-1	0.8	0.0326626	Cellular Processes	Transport and catabolism	04144 Endocytosis [PATH:ko04144]	2
ABC.NGC.P1; N-acetylglucosamine transport system permease protein	0.8	0.0326626	Environmental Information Processing	Membrane transport	02010 ABC transporters [PATH:ko02010]	2
ABCB4; ATP-binding cassette, subfamily B (MDR/TAP), member 4	0.8	0.0326626	Environmental Information Processing	Membrane transport	02010 ABC transporters [PATH:ko02010]	2
gsiB; glutathione transport system substrate-binding protein	0.8	0.0326626	Environmental Information Processing	Membrane transport	02010 ABC transporters [PATH:ko02010]	2
rcsB; two-component system, NarL family, captular synthesis response regulator RcsB	0.8	0.0326626	Environmental Information Processing	Signal transduction	02020 Two-component system [PATH:ko02020]	2
rpoE2; DNA-directed RNA polymerase subunit E" [EC:2.7.7.6]	0.8	0.0326626	Genetic Information Processing	Transcription	03020 RNA polymerase [PATH:ko03020]	2
NUPL2, CG1; nucleoporin-like protein 2	0.8	0.0326626	Genetic Information Processing	Translation	03013 RNA transport [PATH:ko03013]	2
hcaA2, hcaF; 3-phenylpropionate/cinnamic acid dioxygenase subunit beta [EC:1.14.12.19]	0.8	0.0326626	Metabolism	Amino acid metabolism	00360 Phenylalanine metabolism [PATH:ko00360]	2
CMAH; CMP-N-acetylneuraminate monooxygenase [EC:1.14.18.2]	0.8	0.0326626	Metabolism	Carbohydrate metabolism	00520 Amino sugar and nucleotide sugar metabolism [PATH:ko00520]	2
psbI; photosystem II PsbI protein	0.8	0.0326626	Metabolism	Energy metabolism	00195 Photosynthesis [PATH:ko00195]	2
E1.12.7.2S; ferredoxin hydrogenase small subunit [EC:1.12.7.2]	0.8	0.0326626	Metabolism	Energy metabolism	00680 Methane metabolism [PATH:ko00680]	2
napE; periplasmic nitrate reductase NapE	0.8	0.0326626	Metabolism	Energy metabolism	00910 Nitrogen metabolism [PATH:ko00910]	2
nadX; aspartate dehydrogenase [EC:1.4.1.21]	0.8	0.0326626	Metabolism	Metabolism of cofactors and vitamins	00760 Nicotinate and nicotinamide metabolism [PATH:ko00760]	2
crtW; beta-carotene ketolase (CrtW type)	0.8	0.0326626	Metabolism	Metabolism of terpenoids and polyketides	00906 Carotenoid biosynthesis [PATH:ko00906]	2
divJ; two-component system, cell cycle sensor histidine kinase DivJ [EC:2.7.13.3]	0.816667	0.0264014	Cellular Processes	Cell growth and death	04112 Cell cycle - Caulobacter [PATH:ko04112]	2
petJ; cytochrome c6	0.816667	0.0264014	Metabolism	Energy metabolism	00195 Photosynthesis [PATH:ko00195]	2
ABC-2.CPSE.P; capsular polysaccharide transport system permease protein	0.816667	0.0264014	Environmental Information Processing	Membrane transport	02010 ABC transporters [PATH:ko02010]	2
ABC-2.CPSE.P1; capsular polysaccharide transport system permease protein	0.816667	0.0264014	Environmental Information Processing	Membrane transport	02010 ABC transporters [PATH:ko02010]	2
hisM; histidine transport system permease protein	0.816667	0.0264014	Environmental Information Processing	Membrane transport	02010 ABC transporters [PATH:ko02010]	2
natB; sodium transport system permease protein	0.816667	0.0264014	Environmental Information Processing	Membrane transport	02010 ABC transporters [PATH:ko02010]	2
natC; neutral amino acid transport system permease protein	0.816667	0.0264014	Environmental Information Processing	Membrane transport	02010 ABC transporters [PATH:ko02010]	2
wspC; chemotaxis protein methyltransferase WspC	0.816667	0.0264014	Environmental Information Processing	Signal transduction	02020 Two-component system [PATH:ko02020]	2
ETR, ERS; ethylene receptor [EC:2.7.13.-]	0.816667	0.0264014	Environmental Information Processing	Signal transduction	04075 Plant hormone signal transduction [PATH:ko04075]	2
benB-xylY; benzoate/toluate 1,2-dioxygenase subunit beta [EC:1.14.12.10 1.14.12.-]	0.816667	0.0264014	Metabolism	Xenobiotics biodegradation and metabolism	00362 Benzoate degradation [PATH:ko00362]	2
rpoH; DNA-directed RNA polymerase subunit H [EC:2.7.7.6]	0.816667	0.0264014	Genetic Information Processing	Transcription	03020 RNA polymerase [PATH:ko03020]	2
bbsE; benzylsuccinate CoA-transferase BbsE subunit [EC:2.8.3.15]	0.816667	0.0264014	Metabolism	Xenobiotics biodegradation and metabolism	00623 Toluene degradation [PATH:ko00623]	2
E3.5.1.59; N-carbamoylsarcosine amidase [EC:3.5.1.59]	0.816667	0.0264014	Metabolism	Amino acid metabolism	00330 Arginine and proline metabolism [PATH:ko00330]	2
pdaD; arginine decarboxylase [EC:4.1.1.19]	0.816667	0.0264014	Metabolism	Amino acid metabolism	00330 Arginine and proline metabolism [PATH:ko00330]	2
E2.4.1.217; mannosyl-3-phosphoglycerate synthase [EC:2.4.1.217]	0.816667	0.0264014	Metabolism	Carbohydrate metabolism	00051 Fructose and mannose metabolism [PATH:ko00051]	2
comD; sulfopyruvate decarboxylase subunit alpha [EC:4.1.1.79]	0.816667	0.0264014	Metabolism	Energy metabolism	00680 Methane metabolism [PATH:ko00680]	2
nadM; nicotinamide-nucleotide adenylyltransferase [EC:2.7.7.1]	0.816667	0.0264014	Metabolism	Metabolism of cofactors and vitamins	00760 Nicotinate and nicotinamide metabolism [PATH:ko00760]	2
eryK; erythromycin 12 hydroxylase [EC:1.14.13.154]	0.816667	0.0264014	Metabolism	Metabolism of terpenoids and polyketides	00522 Biosynthesis of 12-, 14- and 16-membered macrolides [PATH:ko00522]	2
occQ, nocQ; octopine/nopaline transport system permease protein	0.833333	0.020874	Environmental Information Processing	Membrane transport	02010 ABC transporters [PATH:ko02010]	2
PTS-Fru-EIIB, fruA; PTS system, fructose-specific IIB component [EC:2.7.1.69]	0.833333	0.020874	Environmental Information Processing	Membrane transport	02060 Phosphotransferase system (PTS) [PATH:ko02060]	2
thuK; trehalose/maltose transport system ATP-binding protein	0.833333	0.020874	Environmental Information Processing	Membrane transport	02010 ABC transporters [PATH:ko02010]	2
tupC, vupC; tungstate transport system ATP-binding protein	0.833333	0.020874	Environmental Information Processing	Membrane transport	02010 ABC transporters [PATH:ko02010]	2
narX; two-component system, NarL family, nitrate/nitrite sensor histidine kinase NarX [EC:2.7.13.3]	0.833333	0.020874	Environmental Information Processing	Signal transduction	02020 Two-component system [PATH:ko02020]	2
RP-S30e, RPS30; small subunit ribosomal protein S30e	0.833333	0.020874	Genetic Information Processing	Translation	03010 Ribosome [PATH:ko03010]	2
E1.14.12.7; phthalate 4,5-dioxygenase [EC:1.14.12.7]	0.833333	0.020874	Metabolism	Xenobiotics biodegradation and metabolism	00624 Polycyclic aromatic hydrocarbon degradation [PATH:ko00624]	2
E1.1.1.21, AKR1; aldehyde reductase [EC:1.1.1.21]	0.833333	0.020874	Metabolism	Carbohydrate metabolism	00040 Pentose and glucuronate interconversions [PATH:ko00040]	2
E3.1.3.70; mannosyl-3-phosphoglycerate phosphatase [EC:3.1.3.70]	0.833333	0.020874	Metabolism	Carbohydrate metabolism	00051 Fructose and mannose metabolism [PATH:ko00051]	2
K13876, araD; 2-keto-3-deoxy-L-arabinonate dehydratase [EC:4.2.1.43]	0.833333	0.020874	Metabolism	Carbohydrate metabolism	00053 Ascorbate and aldarate metabolism [PATH:ko00053]	2
E1.2.99.5E, fmdE; formylmethanofuran dehydrogenase subunit E [EC:1.2.99.5]	0.833333	0.020874	Metabolism	Energy metabolism	00680 Methane metabolism [PATH:ko00680]	2
MGLL; acylglycerol lipase [EC:3.1.1.23]	0.833333	0.020874	Metabolism	Lipid metabolism	00561 Glycerolipid metabolism [PATH:ko00561]	2
panC-cmk; pantoate ligase / cytidylate kinase [EC:6.3.2.1 2.7.4.14]	0.833333	0.020874	Metabolism	Metabolism of cofactors and vitamins	00770 Pantothenate and CoA biosynthesis [PATH:ko00770]	2
cobG; precorrin-3B synthase [EC:1.14.13.83]	0.833333	0.020874	Metabolism	Metabolism of cofactors and vitamins	00860 Porphyrin and chlorophyll metabolism [PATH:ko00860]	2
occT, nocT; octopine/nopaline transport system substrate-binding protein	0.85	0.0161686	Environmental Information Processing	Membrane transport	02010 ABC transporters [PATH:ko02010]	2
rpfC; two-component system, sensor histidine kinase RpfC [EC:2.7.13.3]	0.85	0.0161686	Environmental Information Processing	Signal transduction	02020 Two-component system [PATH:ko02020]	2
uvrY; two-component system, NarL family, invasion response regulator UvrY	0.85	0.0161686	Environmental Information Processing	Signal transduction	02020 Two-component system [PATH:ko02020]	2
VTC4; inositol-phosphate phosphatase / L-galactose 1-phosphate phosphatase [EC:3.1.3.25 3.1.3.-]	0.85	0.0161686	Environmental Information Processing	Signal transduction	04070 Phosphatidylinositol signaling system [PATH:ko04070]	2
rpoF; DNA-directed RNA polymerase subunit F [EC:2.7.7.6]	0.85	0.0161686	Genetic Information Processing	Transcription	03020 RNA polymerase [PATH:ko03020]	2
gatE; glutamyl-tRNA(Gln) amidotransferase subunit E [EC:6.3.5.7]	0.85	0.0161686	Genetic Information Processing	Translation	00970 Aminoacyl-tRNA biosynthesis [PATH:ko00970]	2
CAD; carbamoyl-phosphate synthase / aspartate carbamoyltransferase / dihydroorotase [EC:6.3.5.5 2.1.3.2 3.5.2.3]	0.85	0.0161686	Metabolism	Amino acid metabolism	00250 Alanine, aspartate and glutamate metabolism [PATH:ko00250]	2
xad; D-xylonate dehydratase	0.85	0.0161686	Metabolism	Carbohydrate metabolism	00040 Pentose and glucuronate interconversions [PATH:ko00040]	2
PAPSS; 3'-phosphoadenosine 5'-phosphosulfate synthase [EC:2.7.7.4 2.7.1.25]	0.85	0.0161686	Metabolism	Energy metabolism	00920 Sulfur metabolism [PATH:ko00920]	2
eutE; aldehyde dehydrogenase	0.85	0.0161686	Metabolism	Carbohydrate metabolism	00620 Pyruvate metabolism [PATH:ko00620]	2
E1.1.1.61; 4-hydroxybutyrate dehydrogenase [EC:1.1.1.61]	0.85	0.0161686	Metabolism	Carbohydrate metabolism	00650 Butanoate metabolism [PATH:ko00650]	2
nuoBCD; NADH-quinone oxidoreductase subunit B/C/D [EC:1.6.5.3]	0.85	0.0161686	Metabolism	Energy metabolism	00190 Oxidative phosphorylation [PATH:ko00190]	2
psaK; photosystem I subunit X	0.85	0.0161686	Metabolism	Energy metabolism	00195 Photosynthesis [PATH:ko00195]	2
eutC; ethanolamine ammonia-lyase small subunit [EC:4.3.1.7]	0.85	0.0161686	Metabolism	Lipid metabolism	00564 Glycerophospholipid metabolism [PATH:ko00564]	2
E1.1.1.275; (+)-trans-carveol dehydrogenase [EC:1.1.1.275]	0.85	0.0161686	Metabolism	Metabolism of terpenoids and polyketides	00903 Limonene and pinene degradation [PATH:ko00903]	2
xapA; xanthosine phosphorylase [EC:2.4.2.-]	0.85	0.0161686	Metabolism	Nucleotide metabolism	00230 Purine metabolism [PATH:ko00230]	2
cph1; two-component system, chemotaxis family, sensor kinase Cph1 [EC:2.7.13.3]	0.85	0.0161686	Environmental Information Processing	Signal transduction	02020 Two-component system [PATH:ko02020]	2
etbD, todF; 2-hydroxy-6-oxohepta-2,4-dienoate hydroxylase [EC:3.7.1.-]	0.85	0.0161686	Metabolism	Xenobiotics biodegradation and metabolism	00622 Xylene degradation [PATH:ko00622]	2
msmE; multiple sugar transport system substrate-binding protein	0.866667	0.0119802	Environmental Information Processing	Membrane transport	02010 ABC transporters [PATH:ko02010]	2
rhaT; rhamnose transport system ATP-binding protein [EC:3.6.3.17]	0.866667	0.0119802	Environmental Information Processing	Membrane transport	02010 ABC transporters [PATH:ko02010]	2
devR; two-component system, NarL family, response regulator DevR	0.866667	0.0119802	Environmental Information Processing	Signal transduction	02020 Two-component system [PATH:ko02020]	2
rcsF; RcsF protein	0.866667	0.0119802	Environmental Information Processing	Signal transduction	02020 Two-component system [PATH:ko02020]	2
wspE; two-component system, chemotaxis family, sensor histidine kinase and response regulator WspE	0.866667	0.0119802	Environmental Information Processing	Signal transduction	02020 Two-component system [PATH:ko02020]	2
mhpB; 2,3-dihydroxyphenylpropionate 1,2-dioxygenase [EC:1.13.11.16]	0.866667	0.0119802	Metabolism	Amino acid metabolism	00360 Phenylalanine metabolism [PATH:ko00360]	2
REF1; coniferyl-aldehyde dehydrogenase [EC:1.2.1.68]	0.866667	0.0119802	Metabolism	Biosynthesis of other secondary metabolites	00940 Phenylpropanoid biosynthesis [PATH:ko00940]	2
K01622; fructose 1,6-bisphosphate aldolase/phosphatase [EC:4.1.2.13 3.1.3.11]	0.866667	0.0119802	Metabolism	Carbohydrate metabolism	00010 Glycolysis / Gluconeogenesis [PATH:ko00010]	2
H6PD; hexose-6-phosphate dehydrogenase [EC:1.1.1.47 3.1.1.31]	0.866667	0.0119802	Metabolism	Carbohydrate metabolism	00030 Pentose phosphate pathway [PATH:ko00030]	2
K13875, araC; L-arabonate dehydrase [EC:4.2.1.25]	0.866667	0.0119802	Metabolism	Carbohydrate metabolism	00053 Ascorbate and aldarate metabolism [PATH:ko00053]	2
dhaB; glycerol dehydratase large subunit [EC:4.2.1.30]	0.866667	0.0119802	Metabolism	Lipid metabolism	00561 Glycerolipid metabolism [PATH:ko00561]	2
E2.1.1.103, NMT; phosphoethanolamine N-methyltransferase [EC:2.1.1.103]	0.866667	0.0119802	Metabolism	Lipid metabolism	00564 Glycerophospholipid metabolism [PATH:ko00564]	2
pchA; salicylate biosynthesis isochorismate synthase [EC:5.4.4.2]	0.866667	0.0119802	Metabolism	Metabolism of cofactors and vitamins	00130 Ubiquinone and other terpenoid-quinone biosynthesis [PATH:ko00130]	2
K13522, nadM; bifunctional NMN adenylyltransferase/nudix hydrolase [EC:2.7.7.1 3.6.1.-]	0.866667	0.0119802	Metabolism	Metabolism of cofactors and vitamins	00760 Nicotinate and nicotinamide metabolism [PATH:ko00760]	2
sulD; dihydroneopterin aldolase / 2-amino-4-hydroxy-6-hydroxymethyldihydropteridine diphosphokinase [EC:4.1.2.25 2.7.6.3]	0.866667	0.0119802	Metabolism	Metabolism of cofactors and vitamins	00790 Folate biosynthesis [PATH:ko00790]	2
E6.3.1.8; glutathionylspermidine synthase [EC:6.3.1.8]	0.866667	0.0119802	Metabolism	Metabolism of other amino acids	00480 Glutathione metabolism [PATH:ko00480]	2
cobD; threonine-phosphate decarboxylase [EC:4.1.1.81]	0.866667	0.0119802	Metabolism	Metabolism of cofactors and vitamins	00860 Porphyrin and chlorophyll metabolism [PATH:ko00860]	2
actIV; cyclase [EC:4.-.-.-]	0.866667	0.0119802	Metabolism	Metabolism of terpenoids and polyketides	01057 Biosynthesis of type II polyketide products [PATH:ko01057]	2
cheX; chemotaxis protein CheX	0.883333	0.00864959	Cellular Processes	Cell motility	02030 Bacterial chemotaxis [PATH:ko02030]	2
natD; neutral amino acid transport system permease protein	0.883333	0.00864959	Environmental Information Processing	Membrane transport	02010 ABC transporters [PATH:ko02010]	2
sasA; two-component system, OmpR family, clock-associated histidine kinase SasA [EC:2.7.13.3]	0.883333	0.00864959	Environmental Information Processing	Signal transduction	02020 Two-component system [PATH:ko02020]	2
rpoK; DNA-directed RNA polymerase subunit K [EC:2.7.7.6]	0.883333	0.00864959	Genetic Information Processing	Transcription	03020 RNA polymerase [PATH:ko03020]	2
RPR2, RPP21; ribonuclease P protein subunit RPR2 [EC:3.1.26.5]	0.883333	0.00864959	Genetic Information Processing	Translation	03013 RNA transport [PATH:ko03013]	2
E1.5.1.9; saccharopine dehydrogenase (NAD+, L-glutamate forming) [EC:1.5.1.9]	0.883333	0.00864959	Metabolism	Amino acid metabolism	00310 Lysine degradation [PATH:ko00310]	2
FAHD1; acylpyruvate hydrolase [EC:3.7.1.5]	0.883333	0.00864959	Metabolism	Amino acid metabolism	00350 Tyrosine metabolism [PATH:ko00350]	2
E3.2.1.147; myrosinase [EC:3.2.1.147]	0.883333	0.00864959	Metabolism	Amino acid metabolism	00380 Tryptophan metabolism [PATH:ko00380]	2
E1.1.99.10; glucose dehydrogenase (acceptor) [EC:1.1.99.10]	0.883333	0.00864959	Metabolism	Carbohydrate metabolism	00030 Pentose phosphate pathway [PATH:ko00030]	2
psbT; photosystem II PsbT protein	0.883333	0.00864959	Metabolism	Energy metabolism	00195 Photosynthesis [PATH:ko00195]	2
E2.7.8.20, mdoB; phosphoglycerol transferase [EC:2.7.8.20]	0.883333	0.00864959	Metabolism	Lipid metabolism	00561 Glycerolipid metabolism [PATH:ko00561]	2
pduE; propanediol dehydratase small subunit [EC:4.2.1.28]	0.883333	0.00864959	Metabolism	Lipid metabolism	00561 Glycerolipid metabolism [PATH:ko00561]	2
E2.1.1.95; tocopherol O-methyltransferase [EC:2.1.1.95]	0.883333	0.00864959	Metabolism	Metabolism of cofactors and vitamins	00130 Ubiquinone and other terpenoid-quinone biosynthesis [PATH:ko00130]	2
menH; 2-succinyl-6-hydroxy-2,4-cyclohexadiene-1-carboxylate synthase [EC:4.2.99.20]	0.883333	0.00864959	Metabolism	Metabolism of cofactors and vitamins	00130 Ubiquinone and other terpenoid-quinone biosynthesis [PATH:ko00130]	2
ribD1; diaminohydroxyphosphoribosylaminopyrimidine deaminase [EC:3.5.4.26]	0.883333	0.00864959	Metabolism	Metabolism of cofactors and vitamins	00740 Riboflavin metabolism [PATH:ko00740]	2
E2.7.7.3B; pantetheine-phosphate adenylyltransferase [EC:2.7.7.3]	0.883333	0.00864959	Metabolism	Metabolism of cofactors and vitamins	00770 Pantothenate and CoA biosynthesis [PATH:ko00770]	2
E1.3.3.5; bilirubin oxidase [EC:1.3.3.5]	0.883333	0.00864959	Metabolism	Metabolism of cofactors and vitamins	00860 Porphyrin and chlorophyll metabolism [PATH:ko00860]	2
fliH; flagellar assembly protein FliH	0.9	0.00585222	Cellular Processes	Cell motility	02040 Flagellar assembly [PATH:ko02040]	2
sdiA; LuxR family transcriptional regulator	0.9	0.00585222	Environmental Information Processing	Signal transduction	02020 Two-component system [PATH:ko02020]	2
E1.1.1.272; (R)-2-hydroxyacid dehydrogenase [EC:1.1.1.272]	0.9	0.00585222	Metabolism	Amino acid metabolism	00270 Cysteine and methionine metabolism [PATH:ko00270]	2
aruH; arginine:pyruvate transaminase [EC:2.6.1.84]	0.9	0.00585222	Metabolism	Amino acid metabolism	00330 Arginine and proline metabolism [PATH:ko00330]	2
E1.1.1.43; phosphogluconate 2-dehydrogenase [EC:1.1.1.43]	0.9	0.00585222	Metabolism	Carbohydrate metabolism	00030 Pentose phosphate pathway [PATH:ko00030]	2
gnaD; gluconate dehydratase [EC:4.2.1.39]	0.9	0.00585222	Metabolism	Carbohydrate metabolism	00030 Pentose phosphate pathway [PATH:ko00030]	2
kdxD; 2-keto-3-deoxyxylonate dehydratase [EC:4.2.1.-]	0.9	0.00585222	Metabolism	Carbohydrate metabolism	00040 Pentose and glucuronate interconversions [PATH:ko00040]	2
E3.2.1.39; glucan endo-1,3-beta-D-glucosidase [EC:3.2.1.39]	0.9	0.00585222	Metabolism	Carbohydrate metabolism	00500 Starch and sucrose metabolism [PATH:ko00500]	2
E1.2.1.2NG, fdnI; formate dehydrogenase-N, gamma subunit [EC:1.2.1.2]	0.9	0.00585222	Metabolism	Carbohydrate metabolism	00630 Glyoxylate and dicarboxylate metabolism [PATH:ko00630]	2
hbaD, hcrB; 4-hydroxybenzoyl-CoA reductase subunit beta [EC:1.3.7.9]	0.9	0.00585222	Metabolism	Xenobiotics biodegradation and metabolism	00362 Benzoate degradation [PATH:ko00362]	2
ABCB2, TAP1; ATP-binding cassette, subfamily B (MDR/TAP), member 2	0.916667	0.00363313	Cellular Processes	Transport and catabolism	04145 Phagosome [PATH:ko04145]	2
ABCA10; ATP-binding cassette, subfamily A (ABC1), member 10	0.916667	0.00363313	Environmental Information Processing	Membrane transport	02010 ABC transporters [PATH:ko02010]	2
alsB; D-allose transport system substrate-binding protein	0.916667	0.00363313	Environmental Information Processing	Membrane transport	02010 ABC transporters [PATH:ko02010]	2
artP; arginine transport system ATP-binding protein [EC:3.6.3.-]	0.916667	0.00363313	Environmental Information Processing	Membrane transport	02010 ABC transporters [PATH:ko02010]	2
RAD51L1, RAD51B; RAD51-like protein 1	0.916667	0.00363313	Genetic Information Processing	Replication and repair	03440 Homologous recombination [PATH:ko03440]	2
argE1, lysK; LysW-gamma-L-lysine carboxypeptidase	0.916667	0.00363313	Metabolism	Amino acid metabolism	00300 Lysine biosynthesis [PATH:ko00300]	2
E4.1.1.19; arginine decarboxylase [EC:4.1.1.19]	0.916667	0.00363313	Metabolism	Amino acid metabolism	00330 Arginine and proline metabolism [PATH:ko00330]	2
xdh; xylose dehydrogenase (NAD/NADP)	0.916667	0.00363313	Metabolism	Carbohydrate metabolism	00040 Pentose and glucuronate interconversions [PATH:ko00040]	2
E1.1.1.82; malate dehydrogenase (NADP+) [EC:1.1.1.82]	0.916667	0.00363313	Metabolism	Carbohydrate metabolism	00620 Pyruvate metabolism [PATH:ko00620]	2
LHCB5; light-harvesting complex II chlorophyll a/b binding protein 5	0.916667	0.00363313	Metabolism	Energy metabolism	00196 Photosynthesis - antenna proteins [PATH:ko00196]	2
K14471, smtA; succinyl-CoA:(S)- malate CoA transferase subunit A [EC:2.8.3.-]	0.916667	0.00363313	Metabolism	Energy metabolism	00720 Carbon fixation pathways in prokaryotes [PATH:ko00720]	2
CAO; chlorophyllide a oxygenase [EC:1.14.13.122]	0.916667	0.00363313	Metabolism	Metabolism of cofactors and vitamins	00860 Porphyrin and chlorophyll metabolism [PATH:ko00860]	2
crtC; carotenoid 1,2-hydratase [EC:4.2.1.131]	0.916667	0.00363313	Metabolism	Metabolism of terpenoids and polyketides	00906 Carotenoid biosynthesis [PATH:ko00906]	2
pchB; isochorismate pyruvate lyase [EC:4.2.99.21]	0.916667	0.00363313	Metabolism	Metabolism of terpenoids and polyketides	01053 Biosynthesis of siderophore group nonribosomal peptides [PATH:ko01053]	2
actVII; aromatase [EC:4.2.1.-]	0.916667	0.00363313	Metabolism	Metabolism of terpenoids and polyketides	01056 Biosynthesis of type II polyketide backbone [PATH:ko01056]	2
purCD; fusion protein PurCD [EC:6.3.2.6 6.3.4.13]	0.916667	0.00363313	Metabolism	Nucleotide metabolism	00230 Purine metabolism [PATH:ko00230]	2
aotQ; arginine/ornithine transport system permease protein	0.933333	0.0020874	Environmental Information Processing	Membrane transport	02010 ABC transporters [PATH:ko02010]	2
lsrC; AI-2 transport system permease protein	0.933333	0.0020874	Environmental Information Processing	Membrane transport	02010 ABC transporters [PATH:ko02010]	2
thuF, sugA; trehalose/maltose transport system permease protein	0.933333	0.0020874	Environmental Information Processing	Membrane transport	02010 ABC transporters [PATH:ko02010]	2
wspA; methyl-accepting chemotaxis protein WspA	0.933333	0.0020874	Environmental Information Processing	Signal transduction	02020 Two-component system [PATH:ko02020]	2
UBE1L, UBA7; ubiquitin-activating enzyme E1-like [EC:6.3.2.19]	0.933333	0.0020874	Genetic Information Processing	Folding, sorting and degradation	04120 Ubiquitin mediated proteolysis [PATH:ko04120]	2
BHMT; betaine-homocysteine S-methyltransferase [EC:2.1.1.5]	0.933333	0.0020874	Metabolism	Amino acid metabolism	00260 Glycine, serine and threonine metabolism [PATH:ko00260]	2
E5.1.2.2; mandelate racemase [EC:5.1.2.2]	0.933333	0.0020874	Metabolism	Xenobiotics biodegradation and metabolism	00627 Aminobenzoate degradation [PATH:ko00627]	2
E1.3.1.45; 2'-hydroxyisoflavone reductase [EC:1.3.1.45]	0.933333	0.0020874	Metabolism	Biosynthesis of other secondary metabolites	00943 Isoflavonoid biosynthesis [PATH:ko00943]	2
pgi1; glucose-6-phosphate isomerase, archaeal [EC:5.3.1.9]	0.933333	0.0020874	Metabolism	Carbohydrate metabolism	00010 Glycolysis / Gluconeogenesis [PATH:ko00010]	2
PGM2L1; glucose-1,6-bisphosphate synthase [EC:2.7.1.106]	0.933333	0.0020874	Metabolism	Carbohydrate metabolism	00500 Starch and sucrose metabolism [PATH:ko00500]	2
nagK, NAGK; N-acetylglucosamine kinase [EC:2.7.1.59]	0.933333	0.0020874	Metabolism	Carbohydrate metabolism	00520 Amino sugar and nucleotide sugar metabolism [PATH:ko00520]	2
dhaT; 1,3-propanediol dehydrogenase [EC:1.1.1.202]	0.933333	0.0020874	Metabolism	Lipid metabolism	00561 Glycerolipid metabolism [PATH:ko00561]	2
VTE3, APG1; MPBQ/MSBQ methyltransferase	0.933333	0.0020874	Metabolism	Metabolism of cofactors and vitamins	00130 Ubiquinone and other terpenoid-quinone biosynthesis [PATH:ko00130]	2
cbiE; cobalt-precorrin-6Y C5-methyltransferase [EC:2.1.1.-]	0.933333	0.0020874	Metabolism	Metabolism of cofactors and vitamins	00860 Porphyrin and chlorophyll metabolism [PATH:ko00860]	2
purP; 5-formaminoimidazole-4-carboxamide-1-(beta)-D-ribofuranosyl 5'-monophosphate synthetase [EC:6.3.4.-]	0.933333	0.0020874	Metabolism	Nucleotide metabolism	00230 Purine metabolism [PATH:ko00230]	2
cheC; chemotaxis protein CheC	0.933333	0.0020874	Cellular Processes	Cell motility	02030 Bacterial chemotaxis [PATH:ko02030]	2
fliOZ, fliO; flagellar protein FliO/FliZ	0.933333	0.0020874	Cellular Processes	Cell motility	02040 Flagellar assembly [PATH:ko02040]	2
DDO; D-aspartate oxidase [EC:1.4.3.1]	0.95	0.00101982	Cellular Processes	Transport and catabolism	04146 Peroxisome [PATH:ko04146]	2
citG; triphosphoribosyl-dephospho-CoA synthase [EC:2.7.8.25]	0.95	0.00101982	Environmental Information Processing	Signal transduction	02020 Two-component system [PATH:ko02020]	2
gluC; glutamate transport system permease protein	0.95	0.00101982	Environmental Information Processing	Membrane transport	02010 ABC transporters [PATH:ko02010]	2
thuG, sugB; trehalose/maltose transport system permease protein	0.95	0.00101982	Environmental Information Processing	Membrane transport	02010 ABC transporters [PATH:ko02010]	2
nrsD, nreB; MFS transporter, NRE family, putaive nickel resistance protein	0.95	0.00101982	Environmental Information Processing	Signal transduction	02020 Two-component system [PATH:ko02020]	2
hbaA; 4-hydroxybenzoate-CoA ligase [EC:6.2.1.27 6.2.1.25]	0.95	0.00101982	Metabolism	Xenobiotics biodegradation and metabolism	00362 Benzoate degradation [PATH:ko00362]	2
lysJ; acetylornithine/LysW-gamma-L-lysine aminotransferase [EC:2.6.1.11 2.6.1.-]	0.95	0.00101982	Metabolism	Amino acid metabolism	00300 Lysine biosynthesis [PATH:ko00300]	2
aroDE, DHQ-SDH; 3-dehydroquinate dehydratase / shikimate dehydrogenase [EC:4.2.1.10 1.1.1.25]	0.95	0.00101982	Metabolism	Amino acid metabolism	00400 Phenylalanine, tyrosine and tryptophan biosynthesis [PATH:ko00400]	2
trpGD; anthranilate synthase/phosphoribosyltransferase [EC:4.1.3.27 2.4.2.18]	0.95	0.00101982	Metabolism	Amino acid metabolism	00400 Phenylalanine, tyrosine and tryptophan biosynthesis [PATH:ko00400]	2
cefD; isopenicillin-N epimerase [EC:5.1.1.17]	0.95	0.00101982	Metabolism	Biosynthesis of other secondary metabolites	00311 Penicillin and cephalosporin biosynthesis [PATH:ko00311]	2
E6.2.1.13; acetyl-CoA synthetase (ADP-forming) [EC:6.2.1.13]	0.95	0.00101982	Metabolism	Carbohydrate metabolism	00010 Glycolysis / Gluconeogenesis [PATH:ko00010]	2
ehbQ; energy-converting hydrogenase B subunit Q	0.95	0.00101982	Metabolism	Energy metabolism	00680 Methane metabolism [PATH:ko00680]	2
nrfD; protein NrfD	0.95	0.00101982	Metabolism	Energy metabolism	00910 Nitrogen metabolism [PATH:ko00910]	2
pmtA; phosphatidylethanolamine/phosphatidyl-N-methylethanolamine N-methyltransferase [EC:2.1.1.17 2.1.1.71]	0.95	0.00101982	Metabolism	Lipid metabolism	00564 Glycerophospholipid metabolism [PATH:ko00564]	2
crtD; 1-hydroxycarotenoid 3,4-desaturase [EC:1.3.99.27]	0.95	0.00101982	Metabolism	Metabolism of terpenoids and polyketides	00906 Carotenoid biosynthesis [PATH:ko00906]	2
actI2; act minimal PKS chain-length factor (CLF/KS beta) [EC:2.3.1.-]	0.95	0.00101982	Metabolism	Metabolism of terpenoids and polyketides	01056 Biosynthesis of type II polyketide backbone [PATH:ko01056]	2
hfaB; holdfast attachment protein HfaB	0.966667	0.000334462	Cellular Processes	Cell growth and death	04112 Cell cycle - Caulobacter [PATH:ko04112]	2
ABC.MAL1.A; maltooligosaccharide transport system ATP-binding protein	0.966667	0.000334462	Environmental Information Processing	Membrane transport	02010 ABC transporters [PATH:ko02010]	2
PTS-Nag-EIIA, nagE; PTS system, N-acetylglucosamine-specific IIA component [EC:2.7.1.69]	0.966667	0.000334462	Environmental Information Processing	Membrane transport	02060 Phosphotransferase system (PTS) [PATH:ko02060]	2
pleC1; two-component system, cell cycle sensor kinase and response regulator [EC:2.7.13.3]	0.966667	0.000334462	Environmental Information Processing	Signal transduction	02020 Two-component system [PATH:ko02020]	2
DNAJB2; DnaJ homolog subfamily B member 2	0.966667	0.000334462	Genetic Information Processing	Folding, sorting and degradation	04141 Protein processing in endoplasmic reticulum [PATH:ko04141]	2
catC; muconolactone D-isomerase [EC:5.3.3.4]	0.966667	0.000334462	Metabolism	Xenobiotics biodegradation and metabolism	00362 Benzoate degradation [PATH:ko00362]	2
E1.13.11.41; 2,4'-dihydroxyacetophenone dioxygenase [EC:1.13.11.41]	0.966667	0.000334462	Metabolism	Xenobiotics biodegradation and metabolism	00363 Bisphenol degradation [PATH:ko00363]	2
rpoP; DNA-directed RNA polymerase subunit P [EC:2.7.7.6]	0.966667	0.000334462	Genetic Information Processing	Transcription	03020 RNA polymerase [PATH:ko03020]	2
BPGM; bisphosphoglycerate mutase [EC:5.4.2.4 5.4.2.1 3.1.3.13]	0.966667	0.000334462	Metabolism	Amino acid metabolism	00260 Glycine, serine and threonine metabolism [PATH:ko00260]	2
gbsB; choline dehydrogenase [EC:1.1.1.1]	0.966667	0.000334462	Metabolism	Amino acid metabolism	00260 Glycine, serine and threonine metabolism [PATH:ko00260]	2
fbaB; fructose-bisphosphate aldolase, class I [EC:4.1.2.13]	0.966667	0.000334462	Metabolism	Amino acid metabolism	00400 Phenylalanine, tyrosine and tryptophan biosynthesis [PATH:ko00400]	2
liaR; two-component system, NarL family, response regulator LiaR	0.966667	0.000334462	Environmental Information Processing	Signal transduction	02020 Two-component system [PATH:ko02020]	2
bchX; chlorophyllide reductase iron protein subunit X [EC:1.18.6.1]	0.966667	0.000334462	Metabolism	Metabolism of cofactors and vitamins	00860 Porphyrin and chlorophyll metabolism [PATH:ko00860]	2
gluD; glutamate transport system permease protein	0.983333	5.01129e-05	Environmental Information Processing	Membrane transport	02010 ABC transporters [PATH:ko02010]	2
thuE; trehalose/maltose transport system substrate-binding protein	0.983333	5.01129e-05	Environmental Information Processing	Membrane transport	02010 ABC transporters [PATH:ko02010]	2
fdnH; formate dehydrogenase-N, beta subunit	0.983333	5.01129e-05	Environmental Information Processing	Signal transduction	02020 Two-component system [PATH:ko02020]	2
def; formylmethionine deformylase [EC:3.5.1.31]	0.983333	5.01129e-05	Metabolism	Amino acid metabolism	00270 Cysteine and methionine metabolism [PATH:ko00270]	2
aruI; 5-guanidino-2-oxopentanoate decarboxylase [EC:4.1.1.75]	0.983333	5.01129e-05	Metabolism	Amino acid metabolism	00330 Arginine and proline metabolism [PATH:ko00330]	2
MTHFD1L; monofunctional C1-tetrahydrofolate synthase, mitochondrial [EC:6.3.4.3]	0.983333	5.01129e-05	Metabolism	Metabolism of cofactors and vitamins	00670 One carbon pool by folate [PATH:ko00670]	2
lptG; lipopolysaccharide export system permease protein	0.766667	0.0476383	Environmental Information Processing	Membrane transport	02010 ABC transporters [PATH:ko02010]	3
pilH; twitching motility two-component system response regulator PilH	0.766667	0.0476383	Environmental Information Processing	Signal transduction	02020 Two-component system [PATH:ko02020]	3
PTS-Nag-EIIC, nagE; PTS system, N-acetylglucosamine-specific IIC component	0.766667	0.0476383	Environmental Information Processing	Membrane transport	02060 Phosphotransferase system (PTS) [PATH:ko02060]	3
E1.14.13.7; phenol 2-monooxygenase [EC:1.14.13.7]	0.766667	0.0476383	Metabolism	Xenobiotics biodegradation and metabolism	00361 Chlorocyclohexane and chlorobenzene degradation [PATH:ko00361]	3
E1.3.1.32; maleylacetate reductase [EC:1.3.1.32]	0.766667	0.0476383	Metabolism	Xenobiotics biodegradation and metabolism	00361 Chlorocyclohexane and chlorobenzene degradation [PATH:ko00361]	3
hfq; host factor-I protein	0.766667	0.0476383	Genetic Information Processing	Folding, sorting and degradation	03018 RNA degradation [PATH:ko03018]	3
SEC11, sipW; signal peptidase, endoplasmic reticulum-type [EC:3.4.-.-]	0.766667	0.0476383	Genetic Information Processing	Folding, sorting and degradation	03060 Protein export [PATH:ko03060]	3
EIF2S3; translation initiation factor 2 subunit 3	0.766667	0.0476383	Genetic Information Processing	Translation	03013 RNA transport [PATH:ko03013]	3
pheA; chorismate mutase / prephenate dehydratase [EC:5.4.99.5 4.2.1.51]	0.766667	0.0476383	Metabolism	Amino acid metabolism	00400 Phenylalanine, tyrosine and tryptophan biosynthesis [PATH:ko00400]	3
glpX-SEBP; fructose-1,6-bisphosphatase II / sedoheptulose-1,7-bisphosphatase [EC:3.1.3.11 3.1.3.37]	0.766667	0.0476383	Metabolism	Carbohydrate metabolism	00010 Glycolysis / Gluconeogenesis [PATH:ko00010]	3
E1.1.1.39; malate dehydrogenase (decarboxylating) [EC:1.1.1.39]	0.766667	0.0476383	Metabolism	Carbohydrate metabolism	00620 Pyruvate metabolism [PATH:ko00620]	3
mtkA; malate-CoA ligase subunit beta [EC:6.2.1.9]	0.766667	0.0476383	Metabolism	Carbohydrate metabolism	00630 Glyoxylate and dicarboxylate metabolism [PATH:ko00630]	3
E1.1.99.2; 2-hydroxyglutarate dehydrogenase [EC:1.1.99.2]	0.766667	0.0476383	Metabolism	Carbohydrate metabolism	00650 Butanoate metabolism [PATH:ko00650]	3
znuB; zinc transport system permease protein	0.766667	0.0476383	Environmental Information Processing	Membrane transport	02010 ABC transporters [PATH:ko02010]	3
flrC, fleR; two component system, response regulator FlrC	0.766667	0.0476383	Environmental Information Processing	Signal transduction	02020 Two-component system [PATH:ko02020]	3
degP, htrA; serine protease Do [EC:3.4.21.107]	0.783333	0.0397463	Environmental Information Processing	Signal transduction	02020 Two-component system [PATH:ko02020]	3
petF; ferredoxin	0.783333	0.0397463	Metabolism	Energy metabolism	00195 Photosynthesis [PATH:ko00195]	3
aspC; nondiscriminating aspartyl-tRNA synthetase [EC:6.1.1.23]	0.783333	0.0397463	Genetic Information Processing	Translation	00970 Aminoacyl-tRNA biosynthesis [PATH:ko00970]	3
EEF1A; elongation factor 1-alpha	0.783333	0.0397463	Genetic Information Processing	Translation	03013 RNA transport [PATH:ko03013]	3
dat; D-alanine transaminase [EC:2.6.1.21]	0.783333	0.0397463	Metabolism	Amino acid metabolism	00310 Lysine degradation [PATH:ko00310]	3
astD; succinylglutamic semialdehyde dehydrogenase [EC:1.2.1.71]	0.783333	0.0397463	Metabolism	Amino acid metabolism	00330 Arginine and proline metabolism [PATH:ko00330]	3
E2.6.1.82; putrescine aminotransferase [EC:2.6.1.82]	0.783333	0.0397463	Metabolism	Amino acid metabolism	00330 Arginine and proline metabolism [PATH:ko00330]	3
E5.1.1.4; proline racemase [EC:5.1.1.4]	0.783333	0.0397463	Metabolism	Amino acid metabolism	00330 Arginine and proline metabolism [PATH:ko00330]	3
maiA, GSTZ1; maleylacetoacetate isomerase [EC:5.2.1.2]	0.783333	0.0397463	Metabolism	Amino acid metabolism	00350 Tyrosine metabolism [PATH:ko00350]	3
E3.1.3.-; [EC:3.1.3.-]	0.783333	0.0397463	Metabolism	Carbohydrate metabolism	00051 Fructose and mannose metabolism [PATH:ko00051]	3
dgoA; 2-dehydro-3-deoxyphosphogalactonate aldolase [EC:4.1.2.21]	0.783333	0.0397463	Metabolism	Carbohydrate metabolism	00052 Galactose metabolism [PATH:ko00052]	3
ndhB; NAD(P)H-quinone oxidoreductase subunit 2 [EC:1.6.5.3]	0.783333	0.0397463	Metabolism	Energy metabolism	00190 Oxidative phosphorylation [PATH:ko00190]	3
vicK; two-component system, OmpR family, sensor histidine kinase VicK [EC:2.7.13.3]	0.783333	0.0397463	Environmental Information Processing	Signal transduction	02020 Two-component system [PATH:ko02020]	3
chlN; light-independent protochlorophyllide reductase subunit N [EC:1.3.7.7]	0.783333	0.0397463	Metabolism	Metabolism of cofactors and vitamins	00860 Porphyrin and chlorophyll metabolism [PATH:ko00860]	3
E1.14.13.81, acsF, chlE; magnesium-protoporphyrin IX monomethyl ester (oxidative) cyclase [EC:1.14.13.81]	0.783333	0.0397463	Metabolism	Metabolism of cofactors and vitamins	00860 Porphyrin and chlorophyll metabolism [PATH:ko00860]	3
ABC.CEB.P, cebF; cellobiose transport system permease protein	0.8	0.0326626	Environmental Information Processing	Membrane transport	02010 ABC transporters [PATH:ko02010]	3
dppD; dipeptide transport system ATP-binding protein	0.8	0.0326626	Environmental Information Processing	Membrane transport	02010 ABC transporters [PATH:ko02010]	3
PTS-Nag-EIIB, nagE; PTS system, N-acetylglucosamine-specific IIB component [EC:2.7.1.69]	0.8	0.0326626	Environmental Information Processing	Membrane transport	02060 Phosphotransferase system (PTS) [PATH:ko02060]	3
creB; two-component system, OmpR family, catabolic regulation response regulator CreB	0.8	0.0326626	Environmental Information Processing	Signal transduction	02020 Two-component system [PATH:ko02020]	3
benC-xylZ; benzoate/toluate 1,2-dioxygenase electron transfer component	0.8	0.0326626	Metabolism	Xenobiotics biodegradation and metabolism	00362 Benzoate degradation [PATH:ko00362]	3
dam; DNA adenine methylase [EC:2.1.1.72]	0.8	0.0326626	Genetic Information Processing	Replication and repair	03430 Mismatch repair [PATH:ko03430]	3
alaA; alanine-synthesizing transaminase [EC:2.6.1.66 2.6.1.2]	0.8	0.0326626	Metabolism	Amino acid metabolism	00250 Alanine, aspartate and glutamate metabolism [PATH:ko00250]	3
trpEG; anthranilate synthase [EC:4.1.3.27]	0.8	0.0326626	Metabolism	Amino acid metabolism	00400 Phenylalanine, tyrosine and tryptophan biosynthesis [PATH:ko00400]	3
E1.1.1.56; ribitol 2-dehydrogenase [EC:1.1.1.56]	0.8	0.0326626	Metabolism	Carbohydrate metabolism	00040 Pentose and glucuronate interconversions [PATH:ko00040]	3
rbcS; ribulose-bisphosphate carboxylase small chain [EC:4.1.1.39]	0.8	0.0326626	Metabolism	Carbohydrate metabolism	00630 Glyoxylate and dicarboxylate metabolism [PATH:ko00630]	3
E3.5.99.7; 1-aminocyclopropane-1-carboxylate deaminase [EC:3.5.99.7]	0.8	0.0326626	Metabolism	Carbohydrate metabolism	00640 Propanoate metabolism [PATH:ko00640]	3
qcrC; ubiquinol-cytochrome c reductase cytochrome c subunit	0.8	0.0326626	Metabolism	Energy metabolism	00190 Oxidative phosphorylation [PATH:ko00190]	3
pbpC; penicillin-binding protein 1C [EC:2.4.1.-]	0.8	0.0326626	Metabolism	Glycan biosynthesis and metabolism	00550 Peptidoglycan biosynthesis [PATH:ko00550]	3
folA; dihydrofolate reductase [EC:1.5.1.3]	0.8	0.0326626	Metabolism	Metabolism of cofactors and vitamins	00670 One carbon pool by folate [PATH:ko00670]	3
ssuE; FMN reductase [EC:1.5.1.38]	0.8	0.0326626	Metabolism	Metabolism of cofactors and vitamins	00740 Riboflavin metabolism [PATH:ko00740]	3
chlB; light-independent protochlorophyllide reductase subunit B [EC:1.3.7.7]	0.8	0.0326626	Metabolism	Metabolism of cofactors and vitamins	00860 Porphyrin and chlorophyll metabolism [PATH:ko00860]	3
chlL; light-independent protochlorophyllide reductase subunit L [EC:1.3.7.7]	0.8	0.0326626	Metabolism	Metabolism of cofactors and vitamins	00860 Porphyrin and chlorophyll metabolism [PATH:ko00860]	3
PPOX, hemY; oxygen-dependent protoporphyrinogen oxidase [EC:1.3.3.4]	0.8	0.0326626	Metabolism	Metabolism of cofactors and vitamins	00860 Porphyrin and chlorophyll metabolism [PATH:ko00860]	3
tpa; taurine-pyruvate aminotransferase [EC:2.6.1.77]	0.8	0.0326626	Metabolism	Metabolism of other amino acids	00430 Taurine and hypotaurine metabolism [PATH:ko00430]	3
accB, bccP; acetyl-CoA carboxylase biotin carboxyl carrier protein	0.816667	0.0264014	Metabolism	Carbohydrate metabolism	00620 Pyruvate metabolism [PATH:ko00620]	3
ABC.CEB.P1, cebG; cellobiose transport system permease protein	0.816667	0.0264014	Environmental Information Processing	Membrane transport	02010 ABC transporters [PATH:ko02010]	3
petB; cytochrome b6	0.816667	0.0264014	Metabolism	Energy metabolism	00195 Photosynthesis [PATH:ko00195]	3
msmF; multiple sugar transport system permease protein	0.816667	0.0264014	Environmental Information Processing	Membrane transport	02010 ABC transporters [PATH:ko02010]	3
sitB; manganese/iron transport system ATP-binding protein	0.816667	0.0264014	Environmental Information Processing	Membrane transport	02010 ABC transporters [PATH:ko02010]	3
gspD; general secretion pathway protein D	0.816667	0.0264014	Environmental Information Processing	Membrane transport	03070 Bacterial secretion system [PATH:ko03070]	3
thiP; thiamine transport system permease protein	0.816667	0.0264014	Environmental Information Processing	Membrane transport	02010 ABC transporters [PATH:ko02010]	3
PTS-Fru-EIIC, fruA; PTS system, fructose-specific IIC component	0.816667	0.0264014	Environmental Information Processing	Membrane transport	02060 Phosphotransferase system (PTS) [PATH:ko02060]	3
E4.1.1.45, ACMSD; aminocarboxymuconate-semialdehyde decarboxylase [EC:4.1.1.45]	0.816667	0.0264014	Metabolism	Amino acid metabolism	00380 Tryptophan metabolism [PATH:ko00380]	3
E3.2.1.86A, celF; 6-phospho-beta-glucosidase [EC:3.2.1.86]	0.816667	0.0264014	Metabolism	Carbohydrate metabolism	00010 Glycolysis / Gluconeogenesis [PATH:ko00010]	3
ascD, ddhD, rfbI; CDP-4-dehydro-6-deoxyglucose reductase [EC:1.17.1.1]	0.816667	0.0264014	Metabolism	Carbohydrate metabolism	00520 Amino sugar and nucleotide sugar metabolism [PATH:ko00520]	3
E2.7.7.43, neuA, CMAS; N-acylneuraminate cytidylyltransferase [EC:2.7.7.43]	0.816667	0.0264014	Metabolism	Carbohydrate metabolism	00520 Amino sugar and nucleotide sugar metabolism [PATH:ko00520]	3
DCAA; acyl-CoA dehydrogenase [EC:1.3.99.-]	0.816667	0.0264014	Metabolism	Xenobiotics biodegradation and metabolism	00930 Caprolactam degradation [PATH:ko00930]	3
butA; (R,R)-butanediol dehydrogenase / diacetyl reductase [EC:1.1.1.4 1.1.1.303]	0.816667	0.0264014	Metabolism	Carbohydrate metabolism	00650 Butanoate metabolism [PATH:ko00650]	3
meh; mesaconyl-C4 CoA hydratase	0.816667	0.0264014	Metabolism	Energy metabolism	00720 Carbon fixation pathways in prokaryotes [PATH:ko00720]	3
znuC; zinc transport system ATP-binding protein [EC:3.6.3.-]	0.816667	0.0264014	Environmental Information Processing	Membrane transport	02010 ABC transporters [PATH:ko02010]	3
chlG, bchG; chlorophyll synthase [EC:2.5.1.62]	0.816667	0.0264014	Metabolism	Metabolism of cofactors and vitamins	00860 Porphyrin and chlorophyll metabolism [PATH:ko00860]	3
gcrA; GcrA cell cycle regulator	0.833333	0.020874	Cellular Processes	Cell growth and death	04112 Cell cycle - Caulobacter [PATH:ko04112]	3
pleC; two-component system, cell cycle sensor histidine kinase PleC [EC:2.7.13.3]	0.833333	0.020874	Cellular Processes	Cell growth and death	04112 Cell cycle - Caulobacter [PATH:ko04112]	3
dppA; dipeptide transport system substrate-binding protein	0.833333	0.020874	Cellular Processes	Cell motility	02030 Bacterial chemotaxis [PATH:ko02030]	3
E4.4.1.19, comA; phosphosulfolactate synthase [EC:4.4.1.19]	0.833333	0.020874	Metabolism	Energy metabolism	00680 Methane metabolism [PATH:ko00680]	3
cysU; sulfate transport system permease protein	0.833333	0.020874	Environmental Information Processing	Membrane transport	02010 ABC transporters [PATH:ko02010]	3
gltL; glutamate/aspartate transport system ATP-binding protein [EC:3.6.3.-]	0.833333	0.020874	Environmental Information Processing	Membrane transport	02010 ABC transporters [PATH:ko02010]	3
gsiC; glutathione transport system permease protein	0.833333	0.020874	Environmental Information Processing	Membrane transport	02010 ABC transporters [PATH:ko02010]	3
lacG, araQ; lactose/L-arabinose transport system permease protein	0.833333	0.020874	Environmental Information Processing	Membrane transport	02010 ABC transporters [PATH:ko02010]	3
potC; spermidine/putrescine transport system permease protein	0.833333	0.020874	Environmental Information Processing	Membrane transport	02010 ABC transporters [PATH:ko02010]	3
narB; ferredoxin-nitrate reductase [EC:1.7.7.2]	0.833333	0.020874	Metabolism	Energy metabolism	00910 Nitrogen metabolism [PATH:ko00910]	3
ugpE; sn-glycerol 3-phosphate transport system permease protein	0.833333	0.020874	Environmental Information Processing	Membrane transport	02010 ABC transporters [PATH:ko02010]	3
urtA; urea transport system substrate-binding protein	0.833333	0.020874	Environmental Information Processing	Membrane transport	02010 ABC transporters [PATH:ko02010]	3
norF; nitric-oxide reductase NorF protein [EC:1.7.99.7]	0.833333	0.020874	Metabolism	Energy metabolism	00910 Nitrogen metabolism [PATH:ko00910]	3
ligI; 2-pyrone-4,6-dicarboxylate lactonase [EC:3.1.1.57]	0.833333	0.020874	Metabolism	Xenobiotics biodegradation and metabolism	00362 Benzoate degradation [PATH:ko00362]	3
frdB; fumarate reductase iron-sulfur subunit [EC:1.3.99.1]	0.833333	0.020874	Environmental Information Processing	Signal transduction	02020 Two-component system [PATH:ko02020]	3
alkA; DNA-3-methyladenine glycosylase II [EC:3.2.2.21]	0.833333	0.020874	Genetic Information Processing	Replication and repair	03410 Base excision repair [PATH:ko03410]	3
glxK; glycerate kinase [EC:2.7.1.31]	0.833333	0.020874	Metabolism	Amino acid metabolism	00260 Glycine, serine and threonine metabolism [PATH:ko00260]	3
arcC; carbamate kinase [EC:2.7.2.2]	0.833333	0.020874	Metabolism	Amino acid metabolism	00330 Arginine and proline metabolism [PATH:ko00330]	3
argA; amino-acid N-acetyltransferase [EC:2.3.1.1]	0.833333	0.020874	Metabolism	Amino acid metabolism	00330 Arginine and proline metabolism [PATH:ko00330]	3
astB; succinylarginine dihydrolase [EC:3.5.3.23]	0.833333	0.020874	Metabolism	Amino acid metabolism	00330 Arginine and proline metabolism [PATH:ko00330]	3
E1.14.13.-; [EC:1.14.13.-]	0.833333	0.020874	Metabolism	Amino acid metabolism	00340 Histidine metabolism [PATH:ko00340]	3
E1.13.11.4; gentisate 1,2-dioxygenase [EC:1.13.11.4]	0.833333	0.020874	Metabolism	Amino acid metabolism	00350 Tyrosine metabolism [PATH:ko00350]	3
phhA, PAH; phenylalanine-4-hydroxylase [EC:1.14.16.1]	0.833333	0.020874	Metabolism	Amino acid metabolism	00360 Phenylalanine metabolism [PATH:ko00360]	3
sdhD; succinate dehydrogenase membrane anchor subunit	0.833333	0.020874	Metabolism	Carbohydrate metabolism	00020 Citrate cycle (TCA cycle) [PATH:ko00020]	3
fruK; 1-phosphofructokinase [EC:2.7.1.56]	0.833333	0.020874	Metabolism	Carbohydrate metabolism	00051 Fructose and mannose metabolism [PATH:ko00051]	3
rhaA; L-rhamnose isomerase [EC:5.3.1.14]	0.833333	0.020874	Metabolism	Carbohydrate metabolism	00051 Fructose and mannose metabolism [PATH:ko00051]	3
coaA; type I pantothenate kinase [EC:2.7.1.33]	0.833333	0.020874	Metabolism	Metabolism of cofactors and vitamins	00770 Pantothenate and CoA biosynthesis [PATH:ko00770]	3
E1.3.1.2, DPYD; dihydropyrimidine dehydrogenase (NADP+) [EC:1.3.1.2]	0.833333	0.020874	Metabolism	Metabolism of cofactors and vitamins	00770 Pantothenate and CoA biosynthesis [PATH:ko00770]	3
bioD; dethiobiotin synthetase [EC:6.3.3.3]	0.833333	0.020874	Metabolism	Metabolism of cofactors and vitamins	00780 Biotin metabolism [PATH:ko00780]	3
E2.1.1.11, chlM, bchM; magnesium-protoporphyrin O-methyltransferase [EC:2.1.1.11]	0.833333	0.020874	Metabolism	Metabolism of cofactors and vitamins	00860 Porphyrin and chlorophyll metabolism [PATH:ko00860]	3
ispD; 2-C-methyl-D-erythritol 4-phosphate cytidylyltransferase [EC:2.7.7.60]	0.833333	0.020874	Metabolism	Metabolism of terpenoids and polyketides	00900 Terpenoid backbone biosynthesis [PATH:ko00900]	3
DPB1; DNA polymerase II large subunit [EC:2.7.7.7]	0.833333	0.020874	Metabolism	Nucleotide metabolism	00230 Purine metabolism [PATH:ko00230]	3
gpt; xanthine phosphoribosyltransferase [EC:2.4.2.22]	0.833333	0.020874	Metabolism	Nucleotide metabolism	00230 Purine metabolism [PATH:ko00230]	3
cheBR; two-component system, chemotaxis family, CheB/CheR fusion protein [EC:2.1.1.80 3.1.1.61]	0.833333	0.020874	Cellular Processes	Cell motility	02030 Bacterial chemotaxis [PATH:ko02030]	3
flgD; flagellar basal-body rod modification protein FlgD	0.833333	0.020874	Cellular Processes	Cell motility	02040 Flagellar assembly [PATH:ko02040]	3
ftsQ; cell division protein FtsQ	0.85	0.0161686	Cellular Processes	Cell growth and death	04112 Cell cycle - Caulobacter [PATH:ko04112]	3
aglF; alpha-glucoside transport system permease protein	0.85	0.0161686	Environmental Information Processing	Membrane transport	02010 ABC transporters [PATH:ko02010]	3
cysA; sulfate transport system ATP-binding protein [EC:3.6.3.25]	0.85	0.0161686	Environmental Information Processing	Membrane transport	02010 ABC transporters [PATH:ko02010]	3
secG; preprotein translocase subunit SecG	0.85	0.0161686	Environmental Information Processing	Membrane transport	03070 Bacterial secretion system [PATH:ko03070]	3
vasG, clpV; type VI secretion system protein VasG	0.85	0.0161686	Environmental Information Processing	Membrane transport	03070 Bacterial secretion system [PATH:ko03070]	3
troB, mntB, znuC; manganese/zinc/iron transport system ATP- binding protein	0.85	0.0161686	Environmental Information Processing	Membrane transport	02010 ABC transporters [PATH:ko02010]	3
ntrY; two-component system, NtrC family, nitrogen regulation sensor histidine kinase NtrY [EC:2.7.13.3]	0.85	0.0161686	Environmental Information Processing	Signal transduction	02020 Two-component system [PATH:ko02020]	3
ccoP; cytochrome c oxidase cbb3-type subunit III	0.85	0.0161686	Environmental Information Processing	Signal transduction	02020 Two-component system [PATH:ko02020]	3
dctB; two-component system, NtrC family, C4-dicarboxylate transport sensor histidine kinase DctB [EC:2.7.13.3]	0.85	0.0161686	Environmental Information Processing	Signal transduction	02020 Two-component system [PATH:ko02020]	3
phoB1, phoP; two-component system, OmpR family, alkaline phosphatase synthesis response regulator PhoP	0.85	0.0161686	Environmental Information Processing	Signal transduction	02020 Two-component system [PATH:ko02020]	3
pcaI; 3-oxoadipate CoA-transferase, alpha subunit [EC:2.8.3.6]	0.85	0.0161686	Metabolism	Xenobiotics biodegradation and metabolism	00362 Benzoate degradation [PATH:ko00362]	3
rcsC; two-component system, NarL family, capsular synthesis sensor histidine kinase RcsC [EC:2.7.13.3]	0.85	0.0161686	Environmental Information Processing	Signal transduction	02020 Two-component system [PATH:ko02020]	3
LIG1; DNA ligase 1 [EC:6.5.1.1]	0.85	0.0161686	Genetic Information Processing	Replication and repair	03030 DNA replication [PATH:ko03030]	3
poxA; lysyl-tRNA synthetase, class II [EC:6.1.1.6]	0.85	0.0161686	Genetic Information Processing	Translation	00970 Aminoacyl-tRNA biosynthesis [PATH:ko00970]	3
RP-L32, rpmF; large subunit ribosomal protein L32	0.85	0.0161686	Genetic Information Processing	Translation	03010 Ribosome [PATH:ko03010]	3
tdh; threonine 3-dehydrogenase [EC:1.1.1.103]	0.85	0.0161686	Metabolism	Amino acid metabolism	00260 Glycine, serine and threonine metabolism [PATH:ko00260]	3
E4.4.1.11; methionine-gamma-lyase [EC:4.4.1.11]	0.85	0.0161686	Metabolism	Amino acid metabolism	00270 Cysteine and methionine metabolism [PATH:ko00270]	3
metZ; O-succinylhomoserine sulfhydrylase [EC:2.5.1.-]	0.85	0.0161686	Metabolism	Amino acid metabolism	00270 Cysteine and methionine metabolism [PATH:ko00270]	3
eda; 2-dehydro-3-deoxyphosphogluconate aldolase / 4-hydroxy-2-oxoglutarate aldolase [EC:4.1.2.14 4.1.3.16]	0.85	0.0161686	Metabolism	Amino acid metabolism	00330 Arginine and proline metabolism [PATH:ko00330]	3
E2.1.2.5; glutamate formiminotransferase [EC:2.1.2.5]	0.85	0.0161686	Metabolism	Amino acid metabolism	00340 Histidine metabolism [PATH:ko00340]	3
feaB; phenylacetaldehyde dehydrogenase [EC:1.2.1.39]	0.85	0.0161686	Metabolism	Amino acid metabolism	00360 Phenylalanine metabolism [PATH:ko00360]	3
E3.2.1.54; cyclomaltodextrinase [EC:3.2.1.54]	0.85	0.0161686	Metabolism	Carbohydrate metabolism	00500 Starch and sucrose metabolism [PATH:ko00500]	3
murQ; N-acetylmuramic acid 6-phosphate etherase [EC:4.2.1.126]	0.85	0.0161686	Metabolism	Carbohydrate metabolism	00520 Amino sugar and nucleotide sugar metabolism [PATH:ko00520]	3
mcd; (2S)-methylsuccinyl-CoA dehydrogenase	0.85	0.0161686	Metabolism	Carbohydrate metabolism	00630 Glyoxylate and dicarboxylate metabolism [PATH:ko00630]	3
ttdA; L(+)-tartrate dehydratase alpha subunit [EC:4.2.1.32]	0.85	0.0161686	Metabolism	Carbohydrate metabolism	00630 Glyoxylate and dicarboxylate metabolism [PATH:ko00630]	3
E3.1.1.75, phaZ; poly(3-hydroxybutyrate) depolymerase [EC:3.1.1.75]	0.85	0.0161686	Metabolism	Carbohydrate metabolism	00650 Butanoate metabolism [PATH:ko00650]	3
MQCRB, qcrB, bfcB, petB; menaquinol-cytochrome c reductase cytochrome b subunit	0.85	0.0161686	Metabolism	Energy metabolism	00190 Oxidative phosphorylation [PATH:ko00190]	3
cusR, copR, silR; two-component system, OmpR family, copper resistance phosphate regulon response regulator CusR	0.85	0.0161686	Environmental Information Processing	Signal transduction	02020 Two-component system [PATH:ko02020]	3
glnL, ntrB; two-component system, NtrC family, nitrogen regulation sensor histidine kinase GlnL [EC:2.7.13.3]	0.85	0.0161686	Environmental Information Processing	Signal transduction	02020 Two-component system [PATH:ko02020]	3
nirD; nitrite reductase (NAD(P)H) small subunit [EC:1.7.1.4]	0.85	0.0161686	Metabolism	Energy metabolism	00910 Nitrogen metabolism [PATH:ko00910]	3
E1.8.2.1; sulfite dehydrogenase [EC:1.8.2.1]	0.85	0.0161686	Metabolism	Energy metabolism	00920 Sulfur metabolism [PATH:ko00920]	3
E6.3.3.2; 5-formyltetrahydrofolate cyclo-ligase [EC:6.3.3.2]	0.85	0.0161686	Metabolism	Metabolism of cofactors and vitamins	00670 One carbon pool by folate [PATH:ko00670]	3
tenA; thiaminase (transcriptional activator TenA) [EC:3.5.99.2]	0.85	0.0161686	Metabolism	Metabolism of cofactors and vitamins	00730 Thiamine metabolism [PATH:ko00730]	3
cobA; uroporphyrin-III C-methyltransferase [EC:2.1.1.107]	0.85	0.0161686	Metabolism	Metabolism of cofactors and vitamins	00860 Porphyrin and chlorophyll metabolism [PATH:ko00860]	3
gst; glutathione S-transferase [EC:2.5.1.18]	0.85	0.0161686	Metabolism	Metabolism of other amino acids	00480 Glutathione metabolism [PATH:ko00480]	3
flgB; flagellar basal-body rod protein FlgB	0.85	0.0161686	Cellular Processes	Cell motility	02040 Flagellar assembly [PATH:ko02040]	3
fliE; flagellar hook-basal body complex protein FliE	0.85	0.0161686	Cellular Processes	Cell motility	02040 Flagellar assembly [PATH:ko02040]	3
fliF; flagellar M-ring protein FliF	0.85	0.0161686	Cellular Processes	Cell motility	02040 Flagellar assembly [PATH:ko02040]	3
E3.1.1.41; cephalosporin-C deacetylase [EC:3.1.1.41]	0.866667	0.0119802	Metabolism	Biosynthesis of other secondary metabolites	00311 Penicillin and cephalosporin biosynthesis [PATH:ko00311]	3
petC; cytochrome b6-f complex iron-sulfur subunit [EC:1.10.9.1]	0.866667	0.0119802	Metabolism	Energy metabolism	00195 Photosynthesis [PATH:ko00195]	3
E3.6.1.22, NUDT12, nudC; NAD+ diphosphatase [EC:3.6.1.22]	0.866667	0.0119802	Cellular Processes	Transport and catabolism	04146 Peroxisome [PATH:ko04146]	3
ccmA; heme exporter protein A [EC:3.6.3.41]	0.866667	0.0119802	Environmental Information Processing	Membrane transport	02010 ABC transporters [PATH:ko02010]	3
ccmB; heme exporter protein B	0.866667	0.0119802	Environmental Information Processing	Membrane transport	02010 ABC transporters [PATH:ko02010]	3
modC; molybdate transport system ATP-binding protein [EC:3.6.3.29]	0.866667	0.0119802	Environmental Information Processing	Membrane transport	02010 ABC transporters [PATH:ko02010]	3
yajC; preprotein translocase subunit YajC	0.866667	0.0119802	Environmental Information Processing	Membrane transport	03070 Bacterial secretion system [PATH:ko03070]	3
pvdE; putative ATP-binding cassette transporter	0.866667	0.0119802	Environmental Information Processing	Membrane transport	02010 ABC transporters [PATH:ko02010]	3
PTS-Fru-EIIA, fruB; PTS system, fructose-specific IIA component [EC:2.7.1.69]	0.866667	0.0119802	Environmental Information Processing	Membrane transport	02060 Phosphotransferase system (PTS) [PATH:ko02060]	3
E1.13.11.37; hydroxyquinol 1,2-dioxygenase [EC:1.13.11.37]	0.866667	0.0119802	Metabolism	Xenobiotics biodegradation and metabolism	00361 Chlorocyclohexane and chlorobenzene degradation [PATH:ko00361]	3
baeR; two-component system, OmpR family, response regulator BaeR	0.866667	0.0119802	Environmental Information Processing	Signal transduction	02020 Two-component system [PATH:ko02020]	3
dctD; two-component system, NtrC family, C4-dicarboxylate transport response regulator DctD	0.866667	0.0119802	Environmental Information Processing	Signal transduction	02020 Two-component system [PATH:ko02020]	3
ligB; protocatechuate 4,5-dioxygenase, beta chain [EC:1.13.11.8]	0.866667	0.0119802	Metabolism	Xenobiotics biodegradation and metabolism	00362 Benzoate degradation [PATH:ko00362]	3
rpoZ; DNA-directed RNA polymerase subunit omega [EC:2.7.7.6]	0.866667	0.0119802	Genetic Information Processing	Transcription	03020 RNA polymerase [PATH:ko03020]	3
RP-L35, rpmI; large subunit ribosomal protein L35	0.866667	0.0119802	Genetic Information Processing	Translation	03010 Ribosome [PATH:ko03010]	3
E5.1.1.13; aspartate racemase [EC:5.1.1.13]	0.866667	0.0119802	Metabolism	Amino acid metabolism	00250 Alanine, aspartate and glutamate metabolism [PATH:ko00250]	3
ddc; L-2,4-diaminobutyrate decarboxylase [EC:4.1.1.86]	0.866667	0.0119802	Metabolism	Amino acid metabolism	00260 Glycine, serine and threonine metabolism [PATH:ko00260]	3
puuB, ordL; gamma-glutamylputrescine oxidase [EC:1.4.3.-]	0.866667	0.0119802	Metabolism	Amino acid metabolism	00330 Arginine and proline metabolism [PATH:ko00330]	3
ureA; urease subunit gamma [EC:3.5.1.5]	0.866667	0.0119802	Metabolism	Amino acid metabolism	00330 Arginine and proline metabolism [PATH:ko00330]	3
E3.5.3.13; formimidoylglutamate deiminase [EC:3.5.3.13]	0.866667	0.0119802	Metabolism	Amino acid metabolism	00340 Histidine metabolism [PATH:ko00340]	3
E6.2.1.12; 4-coumarate--CoA ligase [EC:6.2.1.12]	0.866667	0.0119802	Metabolism	Amino acid metabolism	00360 Phenylalanine metabolism [PATH:ko00360]	3
aroKB; shikimate kinase / 3-dehydroquinate synthase [EC:2.7.1.71 4.2.3.4]	0.866667	0.0119802	Metabolism	Amino acid metabolism	00400 Phenylalanine, tyrosine and tryptophan biosynthesis [PATH:ko00400]	3
tyrA1; chorismate mutase [EC:5.4.99.5]	0.866667	0.0119802	Metabolism	Amino acid metabolism	00400 Phenylalanine, tyrosine and tryptophan biosynthesis [PATH:ko00400]	3
garL; 2-dehydro-3-deoxyglucarate aldolase [EC:4.1.2.20]	0.866667	0.0119802	Metabolism	Carbohydrate metabolism	00053 Ascorbate and aldarate metabolism [PATH:ko00053]	3
vanB; vanillate monooxygenase [EC:1.14.13.82]	0.866667	0.0119802	Metabolism	Xenobiotics biodegradation and metabolism	00627 Aminobenzoate degradation [PATH:ko00627]	3
crt; 3-hydroxybutyryl-CoA dehydratase [EC:4.2.1.55]	0.866667	0.0119802	Metabolism	Carbohydrate metabolism	00630 Glyoxylate and dicarboxylate metabolism [PATH:ko00630]	3
ATPF1E, atpC; F-type H+-transporting ATPase subunit epsilon [EC:3.6.3.14]	0.866667	0.0119802	Metabolism	Energy metabolism	00190 Oxidative phosphorylation [PATH:ko00190]	3
fae; formaldehyde-activating enzyme [EC:4.3.-.-]	0.866667	0.0119802	Metabolism	Energy metabolism	00680 Methane metabolism [PATH:ko00680]	3
E4.1.2.22; fructose-6-phosphate phosphoketolase [EC:4.1.2.22]	0.866667	0.0119802	Metabolism	Energy metabolism	00710 Carbon fixation in photosynthetic organisms [PATH:ko00710]	3
vanY; D-alanyl-D-alanine carboxypeptidase [EC:3.4.16.4]	0.866667	0.0119802	Metabolism	Glycan biosynthesis and metabolism	00550 Peptidoglycan biosynthesis [PATH:ko00550]	3
ubiX; 3-octaprenyl-4-hydroxybenzoate carboxy-lyase UbiX [EC:4.1.1.-]	0.866667	0.0119802	Metabolism	Metabolism of cofactors and vitamins	00130 Ubiquinone and other terpenoid-quinone biosynthesis [PATH:ko00130]	3
FAD6, desA; omega-6 fatty acid desaturase (delta-12 desaturase) [EC:1.14.19.-]	0.866667	0.0119802	Environmental Information Processing	Signal transduction	02020 Two-component system [PATH:ko02020]	3
pabC; 4-amino-4-deoxychorismate lyase [EC:4.1.3.38]	0.866667	0.0119802	Metabolism	Metabolism of cofactors and vitamins	00790 Folate biosynthesis [PATH:ko00790]	3
cobC1, cobC; cobalamin biosynthetic protein CobC	0.866667	0.0119802	Metabolism	Metabolism of cofactors and vitamins	00860 Porphyrin and chlorophyll metabolism [PATH:ko00860]	3
E1.3.1.33, por; protochlorophyllide reductase [EC:1.3.1.33]	0.866667	0.0119802	Metabolism	Metabolism of cofactors and vitamins	00860 Porphyrin and chlorophyll metabolism [PATH:ko00860]	3
atuD; citronellyl-CoA dehydrogenase [EC:1.3.99.-]	0.866667	0.0119802	Metabolism	Metabolism of terpenoids and polyketides	00281 Geraniol degradation [PATH:ko00281]	3
crtO; beta-carotene ketolase (CrtO type)	0.866667	0.0119802	Metabolism	Metabolism of terpenoids and polyketides	00906 Carotenoid biosynthesis [PATH:ko00906]	3
lcyB, crtL1, crtY; lycopene beta-cyclase [EC:5.5.1.19]	0.866667	0.0119802	Metabolism	Metabolism of terpenoids and polyketides	00906 Carotenoid biosynthesis [PATH:ko00906]	3
cpdB; 2',3'-cyclic-nucleotide 2'-phosphodiesterase [EC:3.1.4.16]	0.866667	0.0119802	Metabolism	Nucleotide metabolism	00230 Purine metabolism [PATH:ko00230]	3
fliR; flagellar biosynthetic protein FliR	0.866667	0.0119802	Cellular Processes	Cell motility	02040 Flagellar assembly [PATH:ko02040]	3
E1.1.3.6; cholesterol oxidase [EC:1.1.3.6]	0.866667	0.0119802	Metabolism	Xenobiotics biodegradation and metabolism	00984 Steroid degradation [PATH:ko00984]	3
divK; two-component system, cell cycle response regulator DivK	0.883333	0.00864959	Cellular Processes	Cell growth and death	04112 Cell cycle - Caulobacter [PATH:ko04112]	3
ABC.GGU.P, gguB; putative multiple sugar transport system permease protein	0.883333	0.00864959	Environmental Information Processing	Membrane transport	02010 ABC transporters [PATH:ko02010]	3
ABC.GLN1.P; putative glutamine transport system permease protein	0.883333	0.00864959	Environmental Information Processing	Membrane transport	02010 ABC transporters [PATH:ko02010]	3
E3.5.1.41; chitin deacetylase [EC:3.5.1.41]	0.883333	0.00864959	Metabolism	Carbohydrate metabolism	00520 Amino sugar and nucleotide sugar metabolism [PATH:ko00520]	3
ABC-2.CPSE.A; capsular polysaccharide transport system ATP-binding protein	0.883333	0.00864959	Environmental Information Processing	Membrane transport	02010 ABC transporters [PATH:ko02010]	3
araG; L-arabinose transport system ATP-binding protein [EC:3.6.3.17]	0.883333	0.00864959	Environmental Information Processing	Membrane transport	02010 ABC transporters [PATH:ko02010]	3
dppC; dipeptide transport system permease protein	0.883333	0.00864959	Environmental Information Processing	Membrane transport	02010 ABC transporters [PATH:ko02010]	3
frcC; fructose transport system permease protein	0.883333	0.00864959	Environmental Information Processing	Membrane transport	02010 ABC transporters [PATH:ko02010]	3
potG; putrescine transport system ATP-binding protein	0.883333	0.00864959	Environmental Information Processing	Membrane transport	02010 ABC transporters [PATH:ko02010]	3
ugpB; sn-glycerol 3-phosphate transport system substrate-binding protein	0.883333	0.00864959	Environmental Information Processing	Membrane transport	02010 ABC transporters [PATH:ko02010]	3
PTS-EI.PTSP, ptsP; phosphotransferase system, enzyme I, PtsP [EC:2.7.3.9]	0.883333	0.00864959	Environmental Information Processing	Membrane transport	02060 Phosphotransferase system (PTS) [PATH:ko02060]	3
PTS-Mtl-EIIA, mtlA; PTS system, mannitol-specific IIA component [EC:2.7.1.69]	0.883333	0.00864959	Environmental Information Processing	Membrane transport	02060 Phosphotransferase system (PTS) [PATH:ko02060]	3
ligJ; 4-oxalmesaconate hydratase [EC:4.2.1.83]	0.883333	0.00864959	Metabolism	Xenobiotics biodegradation and metabolism	00362 Benzoate degradation [PATH:ko00362]	3
hydG, zraR; two-component system, NtrC family, response regulator HydG	0.883333	0.00864959	Environmental Information Processing	Signal transduction	02020 Two-component system [PATH:ko02020]	3
E2.7.1.107, DGK, dgkA; diacylglycerol kinase (ATP dependent) [EC:2.7.1.107]	0.883333	0.00864959	Environmental Information Processing	Signal transduction	04070 Phosphatidylinositol signaling system [PATH:ko04070]	3
moaD; molybdopterin synthase sulfur carrier subunit	0.883333	0.00864959	Genetic Information Processing	Folding, sorting and degradation	04122 Sulfur relay system [PATH:ko04122]	3
xseB; exodeoxyribonuclease VII small subunit [EC:3.1.11.6]	0.883333	0.00864959	Genetic Information Processing	Replication and repair	03430 Mismatch repair [PATH:ko03430]	3
RP-L30, rpmD; large subunit ribosomal protein L30	0.883333	0.00864959	Genetic Information Processing	Translation	03010 Ribosome [PATH:ko03010]	3
SARDH; sarcosine dehydrogenase [EC:1.5.8.3]	0.883333	0.00864959	Metabolism	Amino acid metabolism	00260 Glycine, serine and threonine metabolism [PATH:ko00260]	3
hisIE; phosphoribosyl-ATP pyrophosphohydrolase / phosphoribosyl-AMP cyclohydrolase [EC:3.6.1.31 3.5.4.19]	0.883333	0.00864959	Metabolism	Amino acid metabolism	00340 Histidine metabolism [PATH:ko00340]	3
hisZ; ATP phosphoribosyltransferase regulatory subunit	0.883333	0.00864959	Metabolism	Amino acid metabolism	00340 Histidine metabolism [PATH:ko00340]	3
E1.1.1.90; aryl-alcohol dehydrogenase [EC:1.1.1.90]	0.883333	0.00864959	Metabolism	Amino acid metabolism	00350 Tyrosine metabolism [PATH:ko00350]	3
E3.5.5.1; nitrilase [EC:3.5.5.1]	0.883333	0.00864959	Metabolism	Amino acid metabolism	00380 Tryptophan metabolism [PATH:ko00380]	3
E1.2.7.5, aor; aldehyde:ferredoxin oxidoreductase [EC:1.2.7.5]	0.883333	0.00864959	Metabolism	Carbohydrate metabolism	00010 Glycolysis / Gluconeogenesis [PATH:ko00010]	3
ppgK; polyphosphate glucokinase [EC:2.7.1.63]	0.883333	0.00864959	Metabolism	Carbohydrate metabolism	00010 Glycolysis / Gluconeogenesis [PATH:ko00010]	3
garD; galactarate dehydratase [EC:4.2.1.42]	0.883333	0.00864959	Metabolism	Carbohydrate metabolism	00053 Ascorbate and aldarate metabolism [PATH:ko00053]	3
E1.12.99.6L; hydrogenase large subunit [EC:1.12.99.6]	0.883333	0.00864959	Metabolism	Xenobiotics biodegradation and metabolism	00633 Nitrotoluene degradation [PATH:ko00633]	3
arnC, pmrF; undecaprenyl-phosphate 4-deoxy-4-formamido-L-arabinose transferase [EC:2.7.8.30]	0.883333	0.00864959	Metabolism	Carbohydrate metabolism	00520 Amino sugar and nucleotide sugar metabolism [PATH:ko00520]	3
plcC; phospholipase C [EC:3.1.4.3]	0.883333	0.00864959	Metabolism	Carbohydrate metabolism	00562 Inositol phosphate metabolism [PATH:ko00562]	3
ndhE; NAD(P)H-quinone oxidoreductase subunit 4L [EC:1.6.5.3]	0.883333	0.00864959	Metabolism	Energy metabolism	00190 Oxidative phosphorylation [PATH:ko00190]	3
tagD; glycerol-3-phosphate cytidylyltransferase [EC:2.7.7.39]	0.883333	0.00864959	Metabolism	Lipid metabolism	00564 Glycerophospholipid metabolism [PATH:ko00564]	3
entC; isochorismate synthase [EC:5.4.4.2]	0.883333	0.00864959	Metabolism	Metabolism of cofactors and vitamins	00130 Ubiquinone and other terpenoid-quinone biosynthesis [PATH:ko00130]	3
iunH; purine nucleosidase [EC:3.2.2.1]	0.883333	0.00864959	Metabolism	Metabolism of cofactors and vitamins	00760 Nicotinate and nicotinamide metabolism [PATH:ko00760]	3
E4.2.3.12, queD, ptpS, PTS; 6-pyruvoyl tetrahydrobiopterin synthase [EC:4.2.3.12]	0.883333	0.00864959	Metabolism	Metabolism of cofactors and vitamins	00790 Folate biosynthesis [PATH:ko00790]	3
cobS; cobaltochelatase CobS [EC:6.6.1.2]	0.883333	0.00864959	Metabolism	Metabolism of cofactors and vitamins	00860 Porphyrin and chlorophyll metabolism [PATH:ko00860]	3
MET8; precorrin-2 dehydrogenase / sirohydrochlorin ferrochelatase [EC:1.3.1.76 4.99.1.4]	0.883333	0.00864959	Metabolism	Metabolism of cofactors and vitamins	00860 Porphyrin and chlorophyll metabolism [PATH:ko00860]	3
atuF; geranyl-CoA carboxylase alpha subunit [EC:6.4.1.5]	0.883333	0.00864959	Metabolism	Metabolism of terpenoids and polyketides	00281 Geraniol degradation [PATH:ko00281]	3
ispDF; 2-C-methyl-D-erythritol 4-phosphate cytidylyltransferase / 2-C-methyl-D-erythritol 2,4-cyclodiphosphate synthase [EC:2.7.7.60 4.6.1.12]	0.883333	0.00864959	Metabolism	Metabolism of terpenoids and polyketides	00900 Terpenoid backbone biosynthesis [PATH:ko00900]	3
entC; isochorismate synthase [EC:5.4.4.2]	0.883333	0.00864959	Metabolism	Metabolism of terpenoids and polyketides	01053 Biosynthesis of siderophore group nonribosomal peptides [PATH:ko01053]	3
fliNY, fliN; flagellar motor switch protein FliN/FliY	0.883333	0.00864959	Cellular Processes	Cell motility	02030 Bacterial chemotaxis [PATH:ko02030]	3
CES1; carboxylesterase 1 [EC:3.1.1.1]	0.883333	0.00864959	Metabolism	Xenobiotics biodegradation and metabolism	00983 Drug metabolism - other enzymes [PATH:ko00983]	3
ccrM; modification methylase [EC:2.1.1.72]	0.9	0.00585222	Cellular Processes	Cell growth and death	04112 Cell cycle - Caulobacter [PATH:ko04112]	3
chpT; histidine phosphotransferase ChpT	0.9	0.00585222	Cellular Processes	Cell growth and death	04112 Cell cycle - Caulobacter [PATH:ko04112]	3
cpdR; two-component system, cell cycle response regulator CpdR	0.9	0.00585222	Cellular Processes	Cell growth and death	04112 Cell cycle - Caulobacter [PATH:ko04112]	3
dgcB; diguanylate cyclase	0.9	0.00585222	Cellular Processes	Cell growth and death	04112 Cell cycle - Caulobacter [PATH:ko04112]	3
flp, pilA; pilus assembly protein Flp/PilA	0.9	0.00585222	Cellular Processes	Cell growth and death	04112 Cell cycle - Caulobacter [PATH:ko04112]	3
HXT; MFS transporter, SP family, sugar:H+ symporter	0.9	0.00585222	Cellular Processes	Cell growth and death	04113 Meiosis - yeast [PATH:ko04113]	3
pta; phosphate acetyltransferase [EC:2.3.1.8]	0.9	0.00585222	Metabolism	Carbohydrate metabolism	00620 Pyruvate metabolism [PATH:ko00620]	3
ABC.CEB.S, cebE; cellobiose transport system substrate-binding protein	0.9	0.00585222	Environmental Information Processing	Membrane transport	02010 ABC transporters [PATH:ko02010]	3
ABC.GGU.S, chvE; putative multiple sugar transport system substrate-binding protein	0.9	0.00585222	Environmental Information Processing	Membrane transport	02010 ABC transporters [PATH:ko02010]	3
fliS; flagellar protein FliS	0.9	0.00585222	Cellular Processes	Cell motility	02040 Flagellar assembly [PATH:ko02040]	3
E4.1.1.9, MLYCD; malonyl-CoA decarboxylase [EC:4.1.1.9]	0.9	0.00585222	Cellular Processes	Transport and catabolism	04146 Peroxisome [PATH:ko04146]	3
pta; phosphate acetyltransferase [EC:2.3.1.8]	0.9	0.00585222	Metabolism	Carbohydrate metabolism	00620 Pyruvate metabolism [PATH:ko00620]	3
E3.1.3.71, comB; 2-phosphosulfolactate phosphatase [EC:3.1.3.71]	0.9	0.00585222	Metabolism	Energy metabolism	00680 Methane metabolism [PATH:ko00680]	3
aglG; alpha-glucoside transport system permease protein	0.9	0.00585222	Environmental Information Processing	Membrane transport	02010 ABC transporters [PATH:ko02010]	3
cbiM; cobalt/nickel transport system permease protein	0.9	0.00585222	Environmental Information Processing	Membrane transport	02010 ABC transporters [PATH:ko02010]	3
potB; spermidine/putrescine transport system permease protein	0.9	0.00585222	Environmental Information Processing	Membrane transport	02010 ABC transporters [PATH:ko02010]	3
potI; putrescine transport system permease protein	0.9	0.00585222	Environmental Information Processing	Membrane transport	02010 ABC transporters [PATH:ko02010]	3
smoE, mtlE; sorbitol/mannitol transport system substrate-binding protein	0.9	0.00585222	Environmental Information Processing	Membrane transport	02010 ABC transporters [PATH:ko02010]	3
thiB, tbpA; thiamine transport system substrate-binding protein	0.9	0.00585222	Environmental Information Processing	Membrane transport	02010 ABC transporters [PATH:ko02010]	3
pilA; type IV pilus assembly protein PilA	0.9	0.00585222	Environmental Information Processing	Signal transduction	02020 Two-component system [PATH:ko02020]	3
badA; benzoate-CoA ligase [EC:6.2.1.25]	0.9	0.00585222	Metabolism	Xenobiotics biodegradation and metabolism	00362 Benzoate degradation [PATH:ko00362]	3
mprB; two-component system, OmpR family, sensor histidine kinase MprB [EC:2.7.13.3]	0.9	0.00585222	Environmental Information Processing	Signal transduction	02020 Two-component system [PATH:ko02020]	3
pcaG; protocatechuate 3,4-dioxygenase, alpha subunit [EC:1.13.11.3]	0.9	0.00585222	Metabolism	Xenobiotics biodegradation and metabolism	00362 Benzoate degradation [PATH:ko00362]	3
ompR; two-component system, OmpR family, phosphate regulon response regulator OmpR	0.9	0.00585222	Environmental Information Processing	Signal transduction	02020 Two-component system [PATH:ko02020]	3
UQCRFS1, RIP1, petA; ubiquinol-cytochrome c reductase iron-sulfur subunit [EC:1.10.2.2]	0.9	0.00585222	Environmental Information Processing	Signal transduction	02020 Two-component system [PATH:ko02020]	3
RP-S21, rpsU; small subunit ribosomal protein S21	0.9	0.00585222	Genetic Information Processing	Translation	03010 Ribosome [PATH:ko03010]	3
E5.4.3.2, kamA; lysine 2,3-aminomutase [EC:5.4.3.2]	0.9	0.00585222	Metabolism	Amino acid metabolism	00310 Lysine degradation [PATH:ko00310]	3
E5.1.1.8; 4-hydroxyproline epimerase [EC:5.1.1.8]	0.9	0.00585222	Metabolism	Amino acid metabolism	00330 Arginine and proline metabolism [PATH:ko00330]	3
puuC, aldH; gamma-glutamyl-gamma-aminobutyraldehyde dehydrogenase [EC:1.2.1.-]	0.9	0.00585222	Metabolism	Amino acid metabolism	00330 Arginine and proline metabolism [PATH:ko00330]	3
yiaY; alcohol dehydrogenase [EC:1.1.1.1]	0.9	0.00585222	Metabolism	Amino acid metabolism	00350 Tyrosine metabolism [PATH:ko00350]	3
hcaD; ferredoxin--NAD+ reductase [EC:1.18.1.3]	0.9	0.00585222	Metabolism	Amino acid metabolism	00360 Phenylalanine metabolism [PATH:ko00360]	3
aroH; chorismate mutase [EC:5.4.99.5]	0.9	0.00585222	Metabolism	Amino acid metabolism	00400 Phenylalanine, tyrosine and tryptophan biosynthesis [PATH:ko00400]	3
E1.3.1.12; prephenate dehydrogenase [EC:1.3.1.12]	0.9	0.00585222	Metabolism	Amino acid metabolism	00400 Phenylalanine, tyrosine and tryptophan biosynthesis [PATH:ko00400]	3
E3.1.1.-; esterase / lipase [EC:3.1.1.-]	0.9	0.00585222	Metabolism	Biosynthesis of other secondary metabolites	00960 Tropane, piperidine and pyridine alkaloid biosynthesis [PATH:ko00960]	3
hss; homospermidine synthase [EC:2.5.1.44]	0.9	0.00585222	Metabolism	Biosynthesis of other secondary metabolites	00960 Tropane, piperidine and pyridine alkaloid biosynthesis [PATH:ko00960]	3
E1.2.1.9, gapN; glyceraldehyde-3-phosphate dehydrogenase (NADP) [EC:1.2.1.9]	0.9	0.00585222	Metabolism	Carbohydrate metabolism	00010 Glycolysis / Gluconeogenesis [PATH:ko00010]	3
E1.1.1.215; gluconate 2-dehydrogenase [EC:1.1.1.215]	0.9	0.00585222	Metabolism	Carbohydrate metabolism	00030 Pentose phosphate pathway [PATH:ko00030]	3
edd; phosphogluconate dehydratase [EC:4.2.1.12]	0.9	0.00585222	Metabolism	Carbohydrate metabolism	00030 Pentose phosphate pathway [PATH:ko00030]	3
araB; L-ribulokinase [EC:2.7.1.16]	0.9	0.00585222	Metabolism	Carbohydrate metabolism	00040 Pentose and glucuronate interconversions [PATH:ko00040]	3
E2.4.1.14; sucrose-phosphate synthase [EC:2.4.1.14]	0.9	0.00585222	Metabolism	Carbohydrate metabolism	00500 Starch and sucrose metabolism [PATH:ko00500]	3
E3.5.5.7; aliphatic nitrilase [EC:3.5.5.7]	0.9	0.00585222	Metabolism	Xenobiotics biodegradation and metabolism	00643 Styrene degradation [PATH:ko00643]	3
E3.2.1.3; glucoamylase [EC:3.2.1.3]	0.9	0.00585222	Metabolism	Carbohydrate metabolism	00500 Starch and sucrose metabolism [PATH:ko00500]	3
atzB; hydroxyatrazine ethylaminohydrolase [EC:3.5.99.3]	0.9	0.00585222	Metabolism	Xenobiotics biodegradation and metabolism	00791 Atrazine degradation [PATH:ko00791]	3
rfbG; CDP-glucose 4,6-dehydratase [EC:4.2.1.45]	0.9	0.00585222	Metabolism	Carbohydrate metabolism	00520 Amino sugar and nucleotide sugar metabolism [PATH:ko00520]	3
acyP; acylphosphatase [EC:3.6.1.7]	0.9	0.00585222	Metabolism	Carbohydrate metabolism	00620 Pyruvate metabolism [PATH:ko00620]	3
E1.13.12.4; lactate 2-monooxygenase [EC:1.13.12.4]	0.9	0.00585222	Metabolism	Carbohydrate metabolism	00620 Pyruvate metabolism [PATH:ko00620]	3
oxc; oxalyl-CoA decarboxylase [EC:4.1.1.8]	0.9	0.00585222	Metabolism	Carbohydrate metabolism	00630 Glyoxylate and dicarboxylate metabolism [PATH:ko00630]	3
E2.3.3.5, prpC; 2-methylcitrate synthase [EC:2.3.3.5]	0.9	0.00585222	Metabolism	Carbohydrate metabolism	00640 Propanoate metabolism [PATH:ko00640]	3
sir; sulfite reductase (ferredoxin) [EC:1.8.7.1]	0.9	0.00585222	Metabolism	Energy metabolism	00920 Sulfur metabolism [PATH:ko00920]	3
ndhC; NAD(P)H-quinone oxidoreductase subunit 3 [EC:1.6.5.3]	0.9	0.00585222	Metabolism	Energy metabolism	00190 Oxidative phosphorylation [PATH:ko00190]	3
ndhF; NAD(P)H-quinone oxidoreductase subunit 5 [EC:1.6.5.3]	0.9	0.00585222	Metabolism	Energy metabolism	00190 Oxidative phosphorylation [PATH:ko00190]	3
ndhG; NAD(P)H-quinone oxidoreductase subunit 6 [EC:1.6.5.3]	0.9	0.00585222	Metabolism	Energy metabolism	00190 Oxidative phosphorylation [PATH:ko00190]	3
E1.2.99.5A, fwdA, fmdA; formylmethanofuran dehydrogenase subunit A [EC:1.2.99.5]	0.9	0.00585222	Metabolism	Energy metabolism	00680 Methane metabolism [PATH:ko00680]	3
E2.7.1.19, prkB; phosphoribulokinase [EC:2.7.1.19]	0.9	0.00585222	Metabolism	Energy metabolism	00710 Carbon fixation in photosynthetic organisms [PATH:ko00710]	3
mtrB; two-component system, OmpR family, sensor histidine kinase MtrB [EC:2.7.13.3]	0.9	0.00585222	Environmental Information Processing	Signal transduction	02020 Two-component system [PATH:ko02020]	3
dhaK; dihydroxyacetone kinase, N-terminal domain [EC:2.7.1.-]	0.9	0.00585222	Metabolism	Lipid metabolism	00561 Glycerolipid metabolism [PATH:ko00561]	3
E2.3.1.20; diacylglycerol O-acyltransferase [EC:2.3.1.20]	0.9	0.00585222	Metabolism	Lipid metabolism	00561 Glycerolipid metabolism [PATH:ko00561]	3
cls; cardiolipin synthase [EC:2.7.8.-]	0.9	0.00585222	Metabolism	Lipid metabolism	00564 Glycerophospholipid metabolism [PATH:ko00564]	3
E1.14.19.3; linoleoyl-CoA desaturase [EC:1.14.19.3]	0.9	0.00585222	Metabolism	Lipid metabolism	00591 Linoleic acid metabolism [PATH:ko00591]	3
ubiH; 2-octaprenyl-6-methoxyphenol hydroxylase [EC:1.14.13.-]	0.9	0.00585222	Metabolism	Metabolism of cofactors and vitamins	00130 Ubiquinone and other terpenoid-quinone biosynthesis [PATH:ko00130]	3
SOD1; superoxide dismutase, Cu-Zn family [EC:1.15.1.1]	0.9	0.00585222	Cellular Processes	Transport and catabolism	04146 Peroxisome [PATH:ko04146]	3
desR; two-component system, NarL family, response regulator DesR	0.9	0.00585222	Environmental Information Processing	Signal transduction	02020 Two-component system [PATH:ko02020]	3
E3.5.1.6; beta-ureidopropionase [EC:3.5.1.6]	0.9	0.00585222	Metabolism	Metabolism of cofactors and vitamins	00770 Pantothenate and CoA biosynthesis [PATH:ko00770]	3
panD; aspartate 1-decarboxylase [EC:4.1.1.11]	0.9	0.00585222	Metabolism	Metabolism of cofactors and vitamins	00770 Pantothenate and CoA biosynthesis [PATH:ko00770]	3
pabA; para-aminobenzoate synthetase component II [EC:2.6.1.85]	0.9	0.00585222	Metabolism	Metabolism of cofactors and vitamins	00790 Folate biosynthesis [PATH:ko00790]	3
pabB; para-aminobenzoate synthetase component I [EC:2.6.1.85]	0.9	0.00585222	Metabolism	Metabolism of cofactors and vitamins	00790 Folate biosynthesis [PATH:ko00790]	3
hepST; heptaprenyl diphosphate synthase [EC:2.5.1.30]	0.9	0.00585222	Metabolism	Metabolism of terpenoids and polyketides	00900 Terpenoid backbone biosynthesis [PATH:ko00900]	3
ade; adenine deaminase [EC:3.5.4.2]	0.9	0.00585222	Metabolism	Nucleotide metabolism	00230 Purine metabolism [PATH:ko00230]	3
E3.5.2.5, allB; allantoinase [EC:3.5.2.5]	0.9	0.00585222	Metabolism	Nucleotide metabolism	00230 Purine metabolism [PATH:ko00230]	3
motA; chemotaxis protein MotA	0.9	0.00585222	Cellular Processes	Cell motility	02030 Bacterial chemotaxis [PATH:ko02030]	3
E3.8.1.-; [EC:3.8.1.-]	0.9	0.00585222	Metabolism	Xenobiotics biodegradation and metabolism	00625 Chloroalkane and chloroalkene degradation [PATH:ko00625]	3
fliP; flagellar biosynthetic protein FliP	0.9	0.00585222	Cellular Processes	Cell motility	02040 Flagellar assembly [PATH:ko02040]	3
E3.5.2.6, ampC, penP; beta-lactamase [EC:3.5.2.6]	0.916667	0.00363313	Environmental Information Processing	Signal transduction	02020 Two-component system [PATH:ko02020]	3
flgL; flagellar hook-associated protein 3 FlgL	0.916667	0.00363313	Cellular Processes	Cell motility	02040 Flagellar assembly [PATH:ko02040]	3
E1.4.3.3, DAO; D-amino-acid oxidase [EC:1.4.3.3]	0.916667	0.00363313	Cellular Processes	Transport and catabolism	04146 Peroxisome [PATH:ko04146]	3
mch; methenyltetrahydromethanopterin cyclohydrolase [EC:3.5.4.27]	0.916667	0.00363313	Metabolism	Energy metabolism	00680 Methane metabolism [PATH:ko00680]	3
pilJ; twitching motility protein PilJ	0.916667	0.00363313	Environmental Information Processing	Signal transduction	02020 Two-component system [PATH:ko02020]	3
tupB, vupB; tungstate transport system permease protein	0.916667	0.00363313	Environmental Information Processing	Membrane transport	02010 ABC transporters [PATH:ko02010]	3
xylG; D-xylose transport system ATP-binding protein [EC:3.6.3.17]	0.916667	0.00363313	Environmental Information Processing	Membrane transport	02010 ABC transporters [PATH:ko02010]	3
znuA; zinc transport system substrate-binding protein	0.916667	0.00363313	Environmental Information Processing	Membrane transport	02010 ABC transporters [PATH:ko02010]	3
atoC; two-component system, NtrC family, response regulator AtoC	0.916667	0.00363313	Environmental Information Processing	Signal transduction	02020 Two-component system [PATH:ko02020]	3
pcaD; 3-oxoadipate enol-lactonase [EC:3.1.1.24]	0.916667	0.00363313	Metabolism	Xenobiotics biodegradation and metabolism	00362 Benzoate degradation [PATH:ko00362]	3
mprA; two-component system, OmpR family, response regulator MprA	0.916667	0.00363313	Environmental Information Processing	Signal transduction	02020 Two-component system [PATH:ko02020]	3
tctB; putative tricarboxylic transport membrane protein	0.916667	0.00363313	Environmental Information Processing	Signal transduction	02020 Two-component system [PATH:ko02020]	3
tctE; two-component system, OmpR family, sensor histidine kinase TctE [EC:2.7.13.3]	0.916667	0.00363313	Environmental Information Processing	Signal transduction	02020 Two-component system [PATH:ko02020]	3
RP-L29, rpmC; large subunit ribosomal protein L29	0.916667	0.00363313	Genetic Information Processing	Translation	03010 Ribosome [PATH:ko03010]	3
RP-L33, rpmG; large subunit ribosomal protein L33	0.916667	0.00363313	Genetic Information Processing	Translation	03010 Ribosome [PATH:ko03010]	3
RP-L36, rpmJ; large subunit ribosomal protein L36	0.916667	0.00363313	Genetic Information Processing	Translation	03010 Ribosome [PATH:ko03010]	3
soxG; sarcosine oxidase, subunit gamma [EC:1.5.3.1]	0.916667	0.00363313	Metabolism	Amino acid metabolism	00260 Glycine, serine and threonine metabolism [PATH:ko00260]	3
E1.4.3.10; putrescine oxidase [EC:1.4.3.10]	0.916667	0.00363313	Metabolism	Amino acid metabolism	00330 Arginine and proline metabolism [PATH:ko00330]	3
E3.5.3.6, arcA; arginine deiminase [EC:3.5.3.6]	0.916667	0.00363313	Metabolism	Amino acid metabolism	00330 Arginine and proline metabolism [PATH:ko00330]	3
ureB; urease subunit beta [EC:3.5.1.5]	0.916667	0.00363313	Metabolism	Amino acid metabolism	00330 Arginine and proline metabolism [PATH:ko00330]	3
E3.5.1.68; N-formylglutamate deformylase [EC:3.5.1.68]	0.916667	0.00363313	Metabolism	Amino acid metabolism	00340 Histidine metabolism [PATH:ko00340]	3
E1.13.12.3; tryptophan 2-monooxygenase [EC:1.13.12.3]	0.916667	0.00363313	Metabolism	Amino acid metabolism	00380 Tryptophan metabolism [PATH:ko00380]	3
AROA2, aroA; 3-deoxy-7-phosphoheptulonate synthase [EC:2.5.1.54]	0.916667	0.00363313	Metabolism	Amino acid metabolism	00400 Phenylalanine, tyrosine and tryptophan biosynthesis [PATH:ko00400]	3
E6.4.1.1A, pycA; pyruvate carboxylase subunit A [EC:6.4.1.1]	0.916667	0.00363313	Metabolism	Carbohydrate metabolism	00020 Citrate cycle (TCA cycle) [PATH:ko00020]	3
E4.1.2.9; phosphoketolase [EC:4.1.2.9]	0.916667	0.00363313	Metabolism	Carbohydrate metabolism	00030 Pentose phosphate pathway [PATH:ko00030]	3
kdgK; 2-dehydro-3-deoxygluconokinase [EC:2.7.1.45]	0.916667	0.00363313	Metabolism	Carbohydrate metabolism	00030 Pentose phosphate pathway [PATH:ko00030]	3
E5.3.1.-; [EC:5.3.1.-]	0.916667	0.00363313	Metabolism	Carbohydrate metabolism	00040 Pentose and glucuronate interconversions [PATH:ko00040]	3
fucA; L-fuculose-phosphate aldolase [EC:4.1.2.17]	0.916667	0.00363313	Metabolism	Carbohydrate metabolism	00051 Fructose and mannose metabolism [PATH:ko00051]	3
E3.2.1.10; oligo-1,6-glucosidase [EC:3.2.1.10]	0.916667	0.00363313	Metabolism	Carbohydrate metabolism	00052 Galactose metabolism [PATH:ko00052]	3
melA; alpha-galactosidase [EC:3.2.1.22]	0.916667	0.00363313	Metabolism	Carbohydrate metabolism	00052 Galactose metabolism [PATH:ko00052]	3
bcsA; cellulose synthase (UDP-forming) [EC:2.4.1.12]	0.916667	0.00363313	Metabolism	Carbohydrate metabolism	00500 Starch and sucrose metabolism [PATH:ko00500]	3
rfbF; glucose-1-phosphate cytidylyltransferase [EC:2.7.7.33]	0.916667	0.00363313	Metabolism	Carbohydrate metabolism	00500 Starch and sucrose metabolism [PATH:ko00500]	3
pct; propionate CoA-transferase [EC:2.8.3.1]	0.916667	0.00363313	Metabolism	Carbohydrate metabolism	00620 Pyruvate metabolism [PATH:ko00620]	3
E1.1.1.36, phbB; acetoacetyl-CoA reductase [EC:1.1.1.36]	0.916667	0.00363313	Metabolism	Carbohydrate metabolism	00630 Glyoxylate and dicarboxylate metabolism [PATH:ko00630]	3
ATPF1D, atpH; F-type H+-transporting ATPase subunit delta [EC:3.6.3.14]	0.916667	0.00363313	Metabolism	Energy metabolism	00190 Oxidative phosphorylation [PATH:ko00190]	3
cyoB; cytochrome o ubiquinol oxidase subunit I [EC:1.10.3.-]	0.916667	0.00363313	Metabolism	Energy metabolism	00190 Oxidative phosphorylation [PATH:ko00190]	3
mct; mesaconyl-CoA C1-C4 CoA transferase	0.916667	0.00363313	Metabolism	Energy metabolism	00720 Carbon fixation pathways in prokaryotes [PATH:ko00720]	3
napA; periplasmic nitrate reductase NapA [EC:1.7.99.4]	0.916667	0.00363313	Metabolism	Energy metabolism	00910 Nitrogen metabolism [PATH:ko00910]	3
opuC; osmoprotectant transport system substrate-binding protein	0.916667	0.00363313	Environmental Information Processing	Membrane transport	02010 ABC transporters [PATH:ko02010]	3
dhaL; dihydroxyacetone kinase, C-terminal domain [EC:2.7.1.-]	0.916667	0.00363313	Metabolism	Lipid metabolism	00561 Glycerolipid metabolism [PATH:ko00561]	3
pduC; propanediol dehydratase large subunit [EC:4.2.1.28]	0.916667	0.00363313	Metabolism	Lipid metabolism	00561 Glycerolipid metabolism [PATH:ko00561]	3
E3.1.2.23; 4-hydroxybenzoyl-CoA thioesterase [EC:3.1.2.23]	0.916667	0.00363313	Metabolism	Metabolism of cofactors and vitamins	00130 Ubiquinone and other terpenoid-quinone biosynthesis [PATH:ko00130]	3
menE; O-succinylbenzoic acid--CoA ligase [EC:6.2.1.26]	0.916667	0.00363313	Metabolism	Metabolism of cofactors and vitamins	00130 Ubiquinone and other terpenoid-quinone biosynthesis [PATH:ko00130]	3
thiM; hydroxyethylthiazole kinase [EC:2.7.1.50]	0.916667	0.00363313	Metabolism	Metabolism of cofactors and vitamins	00730 Thiamine metabolism [PATH:ko00730]	3
acpS; holo-[acyl-carrier protein] synthase [EC:2.7.8.7]	0.916667	0.00363313	Metabolism	Metabolism of cofactors and vitamins	00770 Pantothenate and CoA biosynthesis [PATH:ko00770]	3
folK; 2-amino-4-hydroxy-6-hydroxymethyldihydropteridine diphosphokinase [EC:2.7.6.3]	0.916667	0.00363313	Metabolism	Metabolism of cofactors and vitamins	00790 Folate biosynthesis [PATH:ko00790]	3
cbiD; cobalt-precorrin-5B (C1)-methyltransferase [EC:2.1.1.195]	0.916667	0.00363313	Metabolism	Metabolism of cofactors and vitamins	00860 Porphyrin and chlorophyll metabolism [PATH:ko00860]	3
cbiGH-cobJ; cobalt-precorrin 5A hydrolase / precorrin-3B C17-methyltransferase [EC:3.7.1.12 2.1.1.131]	0.916667	0.00363313	Metabolism	Metabolism of cofactors and vitamins	00860 Porphyrin and chlorophyll metabolism [PATH:ko00860]	3
cobIJ; precorrin-2 C20-methyltransferase / precorrin-3B C17-methyltransferase [EC:2.1.1.130 2.1.1.131]	0.916667	0.00363313	Metabolism	Metabolism of cofactors and vitamins	00860 Porphyrin and chlorophyll metabolism [PATH:ko00860]	3
cobT; cobaltochelatase CobT [EC:6.6.1.2]	0.916667	0.00363313	Metabolism	Metabolism of cofactors and vitamins	00860 Porphyrin and chlorophyll metabolism [PATH:ko00860]	3
E2.7.8.26, cobS, cobV; adenosylcobinamide-GDP ribazoletransferase [EC:2.7.8.26]	0.916667	0.00363313	Metabolism	Metabolism of cofactors and vitamins	00860 Porphyrin and chlorophyll metabolism [PATH:ko00860]	3
E5.4.1.2, cobH, cbiC; precorrin-8X methylmutase [EC:5.4.1.2]	0.916667	0.00363313	Metabolism	Metabolism of cofactors and vitamins	00860 Porphyrin and chlorophyll metabolism [PATH:ko00860]	3
E2.5.1.68; short-chain Z-isoprenyl diphosphate synthase [EC:2.5.1.68]	0.916667	0.00363313	Metabolism	Metabolism of terpenoids and polyketides	00900 Terpenoid backbone biosynthesis [PATH:ko00900]	3
E2.7.1.20, ADK; adenosine kinase [EC:2.7.1.20]	0.916667	0.00363313	Metabolism	Nucleotide metabolism	00230 Purine metabolism [PATH:ko00230]	3
E3.6.1.3; adenosinetriphosphatase [EC:3.6.1.3]	0.916667	0.00363313	Metabolism	Nucleotide metabolism	00230 Purine metabolism [PATH:ko00230]	3
yagS; xanthine dehydrogenase YagS FAD-binding subunit [EC:1.17.1.4]	0.916667	0.00363313	Metabolism	Nucleotide metabolism	00230 Purine metabolism [PATH:ko00230]	3
E4.2.1.70; pseudouridylate synthase [EC:4.2.1.70]	0.916667	0.00363313	Metabolism	Nucleotide metabolism	00240 Pyrimidine metabolism [PATH:ko00240]	3
E5.3.2.-; 4-oxalocrotonate tautomerase [EC:5.3.2.-]	0.916667	0.00363313	Metabolism	Xenobiotics biodegradation and metabolism	00362 Benzoate degradation [PATH:ko00362]	3
cheW; purine-binding chemotaxis protein CheW	0.916667	0.00363313	Cellular Processes	Cell motility	02030 Bacterial chemotaxis [PATH:ko02030]	3
flgC; flagellar basal-body rod protein FlgC	0.916667	0.00363313	Cellular Processes	Cell motility	02040 Flagellar assembly [PATH:ko02040]	3
E3.5.4.-; [EC:3.5.4.-]	0.916667	0.00363313	Metabolism	Xenobiotics biodegradation and metabolism	00791 Atrazine degradation [PATH:ko00791]	3
aapJ, bztA; general L-amino acid transport system substrate-binding protein	0.933333	0.0020874	Environmental Information Processing	Membrane transport	02010 ABC transporters [PATH:ko02010]	3
aapM, bztC; general L-amino acid transport system permease protein	0.933333	0.0020874	Environmental Information Processing	Membrane transport	02010 ABC transporters [PATH:ko02010]	3
ABC.CEB.A, msiK; cellobiose transport system ATP-binding protein	0.933333	0.0020874	Environmental Information Processing	Membrane transport	02010 ABC transporters [PATH:ko02010]	3
MCEE, epi; methylmalonyl-CoA/ethylmalonyl-CoA epimerase [EC:5.1.99.1]	0.933333	0.0020874	Metabolism	Amino acid metabolism	00280 Valine, leucine and isoleucine degradation [PATH:ko00280]	3
rbsB; ribose transport system substrate-binding protein	0.933333	0.0020874	Cellular Processes	Cell motility	02030 Bacterial chemotaxis [PATH:ko02030]	3
aglE; alpha-glucoside transport system substrate-binding protein	0.933333	0.0020874	Environmental Information Processing	Membrane transport	02010 ABC transporters [PATH:ko02010]	3
cysW; sulfate transport system permease protein	0.933333	0.0020874	Environmental Information Processing	Membrane transport	02010 ABC transporters [PATH:ko02010]	3
dppB; dipeptide transport system permease protein	0.933333	0.0020874	Environmental Information Processing	Membrane transport	02010 ABC transporters [PATH:ko02010]	3
ftsX; cell division transport system permease protein	0.933333	0.0020874	Environmental Information Processing	Membrane transport	02010 ABC transporters [PATH:ko02010]	3
lacE, araN; lactose/L-arabinose transport system substrate-binding protein	0.933333	0.0020874	Environmental Information Processing	Membrane transport	02010 ABC transporters [PATH:ko02010]	3
lacF, araP; lactose/L-arabinose transport system permease protein	0.933333	0.0020874	Environmental Information Processing	Membrane transport	02010 ABC transporters [PATH:ko02010]	3
mttB; trimethylamine---corrinoid protein Co-methyltransferase [EC:2.1.1.250]	0.933333	0.0020874	Metabolism	Energy metabolism	00680 Methane metabolism [PATH:ko00680]	3
malK; maltose/maltodextrin transport system ATP-binding protein [EC:3.6.3.19]	0.933333	0.0020874	Environmental Information Processing	Membrane transport	02010 ABC transporters [PATH:ko02010]	3
modB; molybdate transport system permease protein	0.933333	0.0020874	Environmental Information Processing	Membrane transport	02010 ABC transporters [PATH:ko02010]	3
smoF, mtlF; sorbitol/mannitol transport system permease protein	0.933333	0.0020874	Environmental Information Processing	Membrane transport	02010 ABC transporters [PATH:ko02010]	3
smoK, mtlK; sorbitol/mannitol transport system ATP-binding protein	0.933333	0.0020874	Environmental Information Processing	Membrane transport	02010 ABC transporters [PATH:ko02010]	3
troA, mntA, znuA; manganese/zinc/iron transport system substrate-binding protein	0.933333	0.0020874	Environmental Information Processing	Membrane transport	02010 ABC transporters [PATH:ko02010]	3
troC, mntC, znuB; manganese/zinc/iron transport system permease protein	0.933333	0.0020874	Environmental Information Processing	Membrane transport	02010 ABC transporters [PATH:ko02010]	3
tupA, vupA; tungstate transport system substrate-binding protein	0.933333	0.0020874	Environmental Information Processing	Membrane transport	02010 ABC transporters [PATH:ko02010]	3
ugpA; sn-glycerol 3-phosphate transport system permease protein	0.933333	0.0020874	Environmental Information Processing	Membrane transport	02010 ABC transporters [PATH:ko02010]	3
ugpC; sn-glycerol 3-phosphate transport system ATP-binding protein [EC:3.6.3.20]	0.933333	0.0020874	Environmental Information Processing	Membrane transport	02010 ABC transporters [PATH:ko02010]	3
0	0.933333	0.0020874	Environmental Information Processing	Signal transduction	02020 Two-component system [PATH:ko02020]	3
tatA; sec-independent protein translocase protein TatA	0.933333	0.0020874	Environmental Information Processing	Membrane transport	03070 Bacterial secretion system [PATH:ko03070]	3
pcaB; 3-carboxy-cis,cis-muconate cycloisomerase [EC:5.5.1.2]	0.933333	0.0020874	Metabolism	Xenobiotics biodegradation and metabolism	00362 Benzoate degradation [PATH:ko00362]	3
pcaC; 4-carboxymuconolactone decarboxylase [EC:4.1.1.44]	0.933333	0.0020874	Metabolism	Xenobiotics biodegradation and metabolism	00362 Benzoate degradation [PATH:ko00362]	3
narL; two-component system, NarL family, nitrate/nitrite response regulator NarL	0.933333	0.0020874	Environmental Information Processing	Signal transduction	02020 Two-component system [PATH:ko02020]	3
pobA; p-hydroxybenzoate 3-monooxygenase [EC:1.14.13.2]	0.933333	0.0020874	Metabolism	Xenobiotics biodegradation and metabolism	00362 Benzoate degradation [PATH:ko00362]	3
tctD; two-component system, OmpR family, response regulator TctD	0.933333	0.0020874	Environmental Information Processing	Signal transduction	02020 Two-component system [PATH:ko02020]	3
mpa; proteasome-associated ATPase	0.933333	0.0020874	Genetic Information Processing	Folding, sorting and degradation	03050 Proteasome [PATH:ko03050]	3
tusA, sirA; tRNA 2-thiouridine synthesizing protein A [EC:2.8.1.-]	0.933333	0.0020874	Genetic Information Processing	Folding, sorting and degradation	04122 Sulfur relay system [PATH:ko04122]	3
HSP20; HSP20 family protein	0.933333	0.0020874	Genetic Information Processing	Folding, sorting and degradation	04141 Protein processing in endoplasmic reticulum [PATH:ko04141]	3
MPG; DNA-3-methyladenine glycosylase [EC:3.2.2.21]	0.933333	0.0020874	Genetic Information Processing	Replication and repair	03410 Base excision repair [PATH:ko03410]	3
MUG, TDG; TDG/mug DNA glycosylase family protein [EC:3.2.2.-]	0.933333	0.0020874	Genetic Information Processing	Replication and repair	03410 Base excision repair [PATH:ko03410]	3
K13798, rpoB; DNA-directed RNA polymerase subunit B [EC:2.7.7.6]	0.933333	0.0020874	Genetic Information Processing	Transcription	03020 RNA polymerase [PATH:ko03020]	3
SIG3.3.1, rpoH; RNA polymerase sigma-32 factor	0.933333	0.0020874	Genetic Information Processing	Transcription	03020 RNA polymerase [PATH:ko03020]	3
E1.5.3.1; sarcosine oxidase [EC:1.5.3.1]	0.933333	0.0020874	Metabolism	Amino acid metabolism	00260 Glycine, serine and threonine metabolism [PATH:ko00260]	3
thrB2; homoserine kinase type II [EC:2.7.1.39]	0.933333	0.0020874	Metabolism	Amino acid metabolism	00260 Glycine, serine and threonine metabolism [PATH:ko00260]	3
ttuD; hydroxypyruvate reductase [EC:1.1.1.81]	0.933333	0.0020874	Metabolism	Amino acid metabolism	00260 Glycine, serine and threonine metabolism [PATH:ko00260]	3
E1.4.1.9; leucine dehydrogenase [EC:1.4.1.9]	0.933333	0.0020874	Metabolism	Amino acid metabolism	00280 Valine, leucine and isoleucine degradation [PATH:ko00280]	3
E1.5.99.8; proline dehydrogenase [EC:1.5.99.8]	0.933333	0.0020874	Metabolism	Amino acid metabolism	00330 Arginine and proline metabolism [PATH:ko00330]	3
E3.5.2.10; creatinine amidohydrolase [EC:3.5.2.10]	0.933333	0.0020874	Metabolism	Amino acid metabolism	00330 Arginine and proline metabolism [PATH:ko00330]	3
E3.5.3.12; agmatine deiminase [EC:3.5.3.12]	0.933333	0.0020874	Metabolism	Amino acid metabolism	00330 Arginine and proline metabolism [PATH:ko00330]	3
E3.1.3.15B; histidinol-phosphatase (PHP family) [EC:3.1.3.15]	0.933333	0.0020874	Metabolism	Amino acid metabolism	00340 Histidine metabolism [PATH:ko00340]	3
hisE; phosphoribosyl-ATP pyrophosphohydrolase [EC:3.6.1.31]	0.933333	0.0020874	Metabolism	Amino acid metabolism	00340 Histidine metabolism [PATH:ko00340]	3
tyrA2; prephenate dehydrogenase [EC:1.3.1.12]	0.933333	0.0020874	Metabolism	Amino acid metabolism	00400 Phenylalanine, tyrosine and tryptophan biosynthesis [PATH:ko00400]	3
E1.7.3.3; urate oxidase [EC:1.7.3.3]	0.933333	0.0020874	Metabolism	Biosynthesis of other secondary metabolites	00232 Caffeine metabolism [PATH:ko00232]	3
E6.2.1.-; [EC:6.2.1.-]	0.933333	0.0020874	Metabolism	Biosynthesis of other secondary metabolites	00960 Tropane, piperidine and pyridine alkaloid biosynthesis [PATH:ko00960]	3
tal-pgi; transaldolase / glucose-6-phosphate isomerase [EC:2.2.1.2 5.3.1.9]	0.933333	0.0020874	Metabolism	Carbohydrate metabolism	00010 Glycolysis / Gluconeogenesis [PATH:ko00010]	3
gdh; glucose 1-dehydrogenase [EC:1.1.1.47]	0.933333	0.0020874	Metabolism	Carbohydrate metabolism	00030 Pentose phosphate pathway [PATH:ko00030]	3
E1.1.99.21; D-sorbitol dehydrogenase (acceptor) [EC:1.1.99.21]	0.933333	0.0020874	Metabolism	Carbohydrate metabolism	00051 Fructose and mannose metabolism [PATH:ko00051]	3
yfaW; L-rhamnonate dehydratase [EC:4.2.1.90]	0.933333	0.0020874	Metabolism	Carbohydrate metabolism	00051 Fructose and mannose metabolism [PATH:ko00051]	3
E1.1.1.122; D-threo-aldose 1-dehydrogenase [EC:1.1.1.122]	0.933333	0.0020874	Metabolism	Carbohydrate metabolism	00053 Ascorbate and aldarate metabolism [PATH:ko00053]	3
E4.2.1.41; 5-dehydro-4-deoxyglucarate dehydratase [EC:4.2.1.41]	0.933333	0.0020874	Metabolism	Carbohydrate metabolism	00053 Ascorbate and aldarate metabolism [PATH:ko00053]	3
gudD; glucarate dehydratase [EC:4.2.1.40]	0.933333	0.0020874	Metabolism	Carbohydrate metabolism	00053 Ascorbate and aldarate metabolism [PATH:ko00053]	3
E3.13.1.1, sqd1, sqdb; UDP-sulfoquinovose synthase [EC:3.13.1.1]	0.933333	0.0020874	Metabolism	Carbohydrate metabolism	00520 Amino sugar and nucleotide sugar metabolism [PATH:ko00520]	3
atzD; cyanuric acid amidohydrolase [EC:3.5.2.15]	0.933333	0.0020874	Metabolism	Xenobiotics biodegradation and metabolism	00791 Atrazine degradation [PATH:ko00791]	3
rfbE; CDP-paratose 2-epimerase [EC:5.1.3.10]	0.933333	0.0020874	Metabolism	Carbohydrate metabolism	00520 Amino sugar and nucleotide sugar metabolism [PATH:ko00520]	3
iolB; 5-deoxy-glucuronate isomerase [EC:5.3.1.-]	0.933333	0.0020874	Metabolism	Carbohydrate metabolism	00562 Inositol phosphate metabolism [PATH:ko00562]	3
iolE; inosose dehydratase [EC:4.2.1.44]	0.933333	0.0020874	Metabolism	Carbohydrate metabolism	00562 Inositol phosphate metabolism [PATH:ko00562]	3
poxB; pyruvate dehydrogenase (quinone) [EC:1.2.5.1]	0.933333	0.0020874	Metabolism	Carbohydrate metabolism	00620 Pyruvate metabolism [PATH:ko00620]	3
E3.5.1.56; N,N-dimethylformamidase [EC:3.5.1.56]	0.933333	0.0020874	Metabolism	Carbohydrate metabolism	00630 Glyoxylate and dicarboxylate metabolism [PATH:ko00630]	3
E5.3.1.22, gip; hydroxypyruvate isomerase [EC:5.3.1.22]	0.933333	0.0020874	Metabolism	Carbohydrate metabolism	00630 Glyoxylate and dicarboxylate metabolism [PATH:ko00630]	3
gcl; tartronate-semialdehyde synthase [EC:4.1.1.47]	0.933333	0.0020874	Metabolism	Carbohydrate metabolism	00630 Glyoxylate and dicarboxylate metabolism [PATH:ko00630]	3
mcl; malyl-CoA lyase [EC:4.1.3.24]	0.933333	0.0020874	Metabolism	Carbohydrate metabolism	00630 Glyoxylate and dicarboxylate metabolism [PATH:ko00630]	3
mtkB; malate-CoA ligase subunit alpha [EC:6.2.1.9]	0.933333	0.0020874	Metabolism	Carbohydrate metabolism	00630 Glyoxylate and dicarboxylate metabolism [PATH:ko00630]	3
rbcL; ribulose-bisphosphate carboxylase large chain [EC:4.1.1.39]	0.933333	0.0020874	Metabolism	Carbohydrate metabolism	00630 Glyoxylate and dicarboxylate metabolism [PATH:ko00630]	3
E4.1.1.4, adc; acetoacetate decarboxylase [EC:4.1.1.4]	0.933333	0.0020874	Metabolism	Carbohydrate metabolism	00640 Propanoate metabolism [PATH:ko00640]	3
E5.2.1.1; maleate isomerase [EC:5.2.1.1]	0.933333	0.0020874	Metabolism	Carbohydrate metabolism	00650 Butanoate metabolism [PATH:ko00650]	3
gctA; glutaconate CoA-transferase, subunit A [EC:2.8.3.12]	0.933333	0.0020874	Metabolism	Carbohydrate metabolism	00650 Butanoate metabolism [PATH:ko00650]	3
ATPF0B, atpF; F-type H+-transporting ATPase subunit b [EC:3.6.3.14]	0.933333	0.0020874	Metabolism	Energy metabolism	00190 Oxidative phosphorylation [PATH:ko00190]	3
E1.6.99.5; NADH dehydrogenase (quinone) [EC:1.6.99.5]	0.933333	0.0020874	Metabolism	Energy metabolism	00190 Oxidative phosphorylation [PATH:ko00190]	3
qcrA; ubiquinol-cytochrome c reductase iron-sulfur subunit	0.933333	0.0020874	Metabolism	Energy metabolism	00190 Oxidative phosphorylation [PATH:ko00190]	3
E2.7.1.29, DAK1, DAK2; dihydroxyacetone kinase [EC:2.7.1.29]	0.933333	0.0020874	Metabolism	Energy metabolism	00680 Methane metabolism [PATH:ko00680]	3
frhB; coenzyme F420 hydrogenase beta subunit [EC:1.12.98.1]	0.933333	0.0020874	Metabolism	Energy metabolism	00680 Methane metabolism [PATH:ko00680]	3
E1.7.99.4C; nitrate reductase catalytic subunit [EC:1.7.99.4]	0.933333	0.0020874	Metabolism	Energy metabolism	00910 Nitrogen metabolism [PATH:ko00910]	3
mtrA; two-component system, OmpR family, response regulator MtrA	0.933333	0.0020874	Environmental Information Processing	Signal transduction	02020 Two-component system [PATH:ko02020]	3
gmhC, hldE, waaE, rfaE; D-beta-D-heptose 7-phosphate kinase / D-beta-D-heptose 1-phosphate adenosyltransferase [EC:2.7.1.167 2.7.7.70]	0.933333	0.0020874	Metabolism	Glycan biosynthesis and metabolism	00540 Lipopolysaccharide biosynthesis [PATH:ko00540]	3
dacB; D-alanyl-D-alanine carboxypeptidase / D-alanyl-D-alanine-endopeptidase (penicillin-binding protein 4) [EC:3.4.16.4 3.4.21.-]	0.933333	0.0020874	Metabolism	Glycan biosynthesis and metabolism	00550 Peptidoglycan biosynthesis [PATH:ko00550]	3
E2.4.1.129; peptidoglycan glycosyltransferase [EC:2.4.1.129]	0.933333	0.0020874	Metabolism	Glycan biosynthesis and metabolism	00550 Peptidoglycan biosynthesis [PATH:ko00550]	3
eutB; ethanolamine ammonia-lyase large subunit [EC:4.3.1.7]	0.933333	0.0020874	Metabolism	Lipid metabolism	00564 Glycerophospholipid metabolism [PATH:ko00564]	3
pldB; lysophospholipase [EC:3.1.1.5]	0.933333	0.0020874	Metabolism	Lipid metabolism	00564 Glycerophospholipid metabolism [PATH:ko00564]	3
thiO; glycine oxidase [EC:1.4.3.19]	0.933333	0.0020874	Metabolism	Metabolism of cofactors and vitamins	00730 Thiamine metabolism [PATH:ko00730]	3
pncA; nicotinamidase/pyrazinamidase [EC:3.5.1.19 3.5.1.-]	0.933333	0.0020874	Metabolism	Metabolism of cofactors and vitamins	00760 Nicotinate and nicotinamide metabolism [PATH:ko00760]	3
sthA, udhA; NAD(P) transhydrogenase [EC:1.6.1.1]	0.933333	0.0020874	Metabolism	Metabolism of cofactors and vitamins	00760 Nicotinate and nicotinamide metabolism [PATH:ko00760]	3
pabBC; para-aminobenzoate synthetase / 4-amino-4-deoxychorismate lyase [EC:2.6.1.85 4.1.3.38]	0.933333	0.0020874	Metabolism	Metabolism of cofactors and vitamins	00790 Folate biosynthesis [PATH:ko00790]	3
cbiB, cobD; adenosylcobinamide-phosphate synthase [EC:6.3.1.10]	0.933333	0.0020874	Metabolism	Metabolism of cofactors and vitamins	00860 Porphyrin and chlorophyll metabolism [PATH:ko00860]	3
cobI-cbiL; precorrin-2/cobalt-factor-2 C20-methyltransferase [EC:2.1.1.130 2.1.1.151]	0.933333	0.0020874	Metabolism	Metabolism of cofactors and vitamins	00860 Porphyrin and chlorophyll metabolism [PATH:ko00860]	3
cobW; cobalamin biosynthesis protein CobW	0.933333	0.0020874	Metabolism	Metabolism of cofactors and vitamins	00860 Porphyrin and chlorophyll metabolism [PATH:ko00860]	3
E2.1.1.133, cobM, cbiF; precorrin-4 C11-methyltransferase [EC:2.1.1.133]	0.933333	0.0020874	Metabolism	Metabolism of cofactors and vitamins	00860 Porphyrin and chlorophyll metabolism [PATH:ko00860]	3
atuG; citronellol/citronellal dehydrogenase	0.933333	0.0020874	Metabolism	Metabolism of terpenoids and polyketides	00281 Geraniol degradation [PATH:ko00281]	3
nudF; ADP-ribose pyrophosphatase [EC:3.6.1.13]	0.933333	0.0020874	Metabolism	Nucleotide metabolism	00230 Purine metabolism [PATH:ko00230]	3
yagR; xanthine dehydrogenase YagR molybdenum-binding subunit [EC:1.17.1.4]	0.933333	0.0020874	Metabolism	Nucleotide metabolism	00230 Purine metabolism [PATH:ko00230]	3
cheR; chemotaxis protein methyltransferase CheR [EC:2.1.1.80]	0.933333	0.0020874	Cellular Processes	Cell motility	02030 Bacterial chemotaxis [PATH:ko02030]	3
cheY; two-component system, chemotaxis family, response regulator CheY	0.933333	0.0020874	Cellular Processes	Cell motility	02030 Bacterial chemotaxis [PATH:ko02030]	3
fliG; flagellar motor switch protein FliG	0.933333	0.0020874	Cellular Processes	Cell motility	02030 Bacterial chemotaxis [PATH:ko02030]	3
fliQ; flagellar biosynthetic protein FliQ	0.933333	0.0020874	Cellular Processes	Cell motility	02040 Flagellar assembly [PATH:ko02040]	3
E5.4.99.2B, mcmA2; methylmalonyl-CoA mutase, C-terminal domain [EC:5.4.99.2]	0.95	0.00101982	Metabolism	Amino acid metabolism	00280 Valine, leucine and isoleucine degradation [PATH:ko00280]	3
gluA; glutamate transport system ATP-binding protein [EC:3.6.3.-]	0.95	0.00101982	Environmental Information Processing	Membrane transport	02010 ABC transporters [PATH:ko02010]	3
msmG; multiple sugar transport system permease protein	0.95	0.00101982	Environmental Information Processing	Membrane transport	02010 ABC transporters [PATH:ko02010]	3
nodJ; lipooligosaccharide transport system permease protein	0.95	0.00101982	Environmental Information Processing	Membrane transport	02010 ABC transporters [PATH:ko02010]	3
troD, mntD, znuB; manganese/zinc/iron transport system permease protein	0.95	0.00101982	Environmental Information Processing	Membrane transport	02010 ABC transporters [PATH:ko02010]	3
yddA; putative ATP-binding cassette transporter	0.95	0.00101982	Environmental Information Processing	Membrane transport	02010 ABC transporters [PATH:ko02010]	3
yejB; microcin C transport system permease protein	0.95	0.00101982	Environmental Information Processing	Membrane transport	02010 ABC transporters [PATH:ko02010]	3
PTS-HPR.FRUB, fruB, fpr; phosphocarrier protein FPr	0.95	0.00101982	Environmental Information Processing	Membrane transport	02060 Phosphotransferase system (PTS) [PATH:ko02060]	3
PTS-Mtl-EIIB, mtlA; PTS system, mannitol-specific IIB component [EC:2.7.1.69]	0.95	0.00101982	Environmental Information Processing	Membrane transport	02060 Phosphotransferase system (PTS) [PATH:ko02060]	3
algD; GDP-mannose 6-dehydrogenase [EC:1.1.1.132]	0.95	0.00101982	Environmental Information Processing	Signal transduction	02020 Two-component system [PATH:ko02020]	3
badH; 2-hydroxycyclohexanecarboxyl-CoA dehydrogenase [EC:1.1.1.-]	0.95	0.00101982	Metabolism	Xenobiotics biodegradation and metabolism	00362 Benzoate degradation [PATH:ko00362]	3
glrR, qseF; two-component system, NtrC family, response regulator GlrR	0.95	0.00101982	Environmental Information Processing	Signal transduction	02020 Two-component system [PATH:ko02020]	3
pcaF; 3-oxoadipyl-CoA thiolase [EC:2.3.1.174]	0.95	0.00101982	Metabolism	Xenobiotics biodegradation and metabolism	00362 Benzoate degradation [PATH:ko00362]	3
ada-alkA; AraC family transcriptional regulator, regulatory protein of adaptative response / DNA-3-methyladenine glycosylase II [EC:3.2.2.21]	0.95	0.00101982	Genetic Information Processing	Replication and repair	03410 Base excision repair [PATH:ko03410]	3
TFIIB, GTF2B, SUA7, tfb; transcription initiation factor TFIIB	0.95	0.00101982	Genetic Information Processing	Transcription	03022 Basal transcription factors [PATH:ko03022]	3
AGXT2; alanine-glyoxylate transaminase / (R)-3-amino-2-methylpropionate-pyruvate transaminase [EC:2.6.1.44 2.6.1.40]	0.95	0.00101982	Metabolism	Amino acid metabolism	00250 Alanine, aspartate and glutamate metabolism [PATH:ko00250]	3
soxD; sarcosine oxidase, subunit delta [EC:1.5.3.1]	0.95	0.00101982	Metabolism	Amino acid metabolism	00260 Glycine, serine and threonine metabolism [PATH:ko00260]	3
dcyD; D-cysteine desulfhydrase [EC:4.4.1.15]	0.95	0.00101982	Metabolism	Amino acid metabolism	00270 Cysteine and methionine metabolism [PATH:ko00270]	3
E2.3.1.168, bkdB; 2-oxoisovalerate dehydrogenase E2 component (dihydrolipoyl transacylase) [EC:2.3.1.168]	0.95	0.00101982	Metabolism	Amino acid metabolism	00280 Valine, leucine and isoleucine degradation [PATH:ko00280]	3
dapC; N-succinyldiaminopimelate aminotransferase [EC:2.6.1.17]	0.95	0.00101982	Metabolism	Amino acid metabolism	00300 Lysine biosynthesis [PATH:ko00300]	3
spuC; putrescine aminotransferase [EC:2.6.1.-]	0.95	0.00101982	Metabolism	Amino acid metabolism	00330 Arginine and proline metabolism [PATH:ko00330]	3
E2.1.1.104; caffeoyl-CoA O-methyltransferase [EC:2.1.1.104]	0.95	0.00101982	Metabolism	Amino acid metabolism	00360 Phenylalanine metabolism [PATH:ko00360]	3
hcaC, bphF; dioxygenase ferredoxin subunit	0.95	0.00101982	Metabolism	Amino acid metabolism	00360 Phenylalanine metabolism [PATH:ko00360]	3
E1.14.14.1; unspecific monooxygenase [EC:1.14.14.1]	0.95	0.00101982	Metabolism	Amino acid metabolism	00380 Tryptophan metabolism [PATH:ko00380]	3
xylC; benzaldehyde dehydrogenase (NAD) [EC:1.2.1.28]	0.95	0.00101982	Metabolism	Xenobiotics biodegradation and metabolism	00622 Xylene degradation [PATH:ko00622]	3
E1.14.13.40; anthraniloyl-CoA monooxygenase [EC:1.14.13.40]	0.95	0.00101982	Metabolism	Xenobiotics biodegradation and metabolism	00627 Aminobenzoate degradation [PATH:ko00627]	3
rhaB; rhamnulokinase [EC:2.7.1.5]	0.95	0.00101982	Metabolism	Carbohydrate metabolism	00040 Pentose and glucuronate interconversions [PATH:ko00040]	3
nemA; N-ethylmaleimide reductase [EC:1.-.-.-]	0.95	0.00101982	Metabolism	Xenobiotics biodegradation and metabolism	00633 Nitrotoluene degradation [PATH:ko00633]	3
E3.1.3.8; 3-phytase [EC:3.1.3.8]	0.95	0.00101982	Metabolism	Carbohydrate metabolism	00562 Inositol phosphate metabolism [PATH:ko00562]	3
gctB; glutaconate CoA-transferase, subunit B [EC:2.8.3.12]	0.95	0.00101982	Metabolism	Carbohydrate metabolism	00650 Butanoate metabolism [PATH:ko00650]	3
ligK, galC; 4-hydroxy-4-methyl-2-oxoglutarate aldolase [EC:4.1.3.17]	0.95	0.00101982	Metabolism	Carbohydrate metabolism	00660 C5-Branched dibasic acid metabolism [PATH:ko00660]	3
mer; coenzyme F420-dependent N5,N10-methenyltetrahydromethanopterin reductase [EC:1.5.99.11]	0.95	0.00101982	Metabolism	Energy metabolism	00680 Methane metabolism [PATH:ko00680]	3
htrB; lipid A biosynthesis lauroyl acyltransferase [EC:2.3.1.-]	0.95	0.00101982	Metabolism	Glycan biosynthesis and metabolism	00540 Lipopolysaccharide biosynthesis [PATH:ko00540]	3
aas; acyl-[acyl-carrier-protein]-phospholipid O-acyltransferase / long-chain-fatty-acid--[acyl-carrier-protein] ligase [EC:2.3.1.40 6.2.1.20]	0.95	0.00101982	Metabolism	Lipid metabolism	00071 Fatty acid metabolism [PATH:ko00071]	3
pcs; phosphatidylcholine synthase [EC:2.7.8.24]	0.95	0.00101982	Metabolism	Lipid metabolism	00564 Glycerophospholipid metabolism [PATH:ko00564]	3
cobB-cbiA; cobyrinic acid a,c-diamide synthase [EC:6.3.5.9 6.3.5.11]	0.95	0.00101982	Metabolism	Metabolism of cofactors and vitamins	00860 Porphyrin and chlorophyll metabolism [PATH:ko00860]	3
cobL; precorrin-6Y C5,15-methyltransferase (decarboxylating) [EC:2.1.1.132]	0.95	0.00101982	Metabolism	Metabolism of cofactors and vitamins	00860 Porphyrin and chlorophyll metabolism [PATH:ko00860]	3
cobP, cobU; adenosylcobinamide kinase / adenosylcobinamide-phosphate guanylyltransferase [EC:2.7.1.156 2.7.7.62]	0.95	0.00101982	Metabolism	Metabolism of cofactors and vitamins	00860 Porphyrin and chlorophyll metabolism [PATH:ko00860]	3
hemD, UROS; uroporphyrinogen-III synthase [EC:4.2.1.75]	0.95	0.00101982	Metabolism	Metabolism of cofactors and vitamins	00860 Porphyrin and chlorophyll metabolism [PATH:ko00860]	3
yagT; xanthine dehydrogenase YagT iron-sulfur-binding subunit	0.95	0.00101982	Metabolism	Nucleotide metabolism	00230 Purine metabolism [PATH:ko00230]	3
E3.8.1.3; haloacetate dehalogenase [EC:3.8.1.3]	0.95	0.00101982	Metabolism	Xenobiotics biodegradation and metabolism	00361 Chlorocyclohexane and chlorobenzene degradation [PATH:ko00361]	3
fliM; flagellar motor switch protein FliM	0.95	0.00101982	Cellular Processes	Cell motility	02030 Bacterial chemotaxis [PATH:ko02030]	3
flgE; flagellar hook protein FlgE	0.95	0.00101982	Cellular Processes	Cell motility	02040 Flagellar assembly [PATH:ko02040]	3
flgK; flagellar hook-associated protein 1 FlgK	0.95	0.00101982	Cellular Processes	Cell motility	02040 Flagellar assembly [PATH:ko02040]	3
abmG; 2-aminobenzoate-CoA ligase [EC:6.2.1.32]	0.95	0.00101982	Metabolism	Xenobiotics biodegradation and metabolism	00627 Aminobenzoate degradation [PATH:ko00627]	3
E1.12.99.6S; hydrogenase small subunit [EC:1.12.99.6]	0.95	0.00101982	Metabolism	Xenobiotics biodegradation and metabolism	00633 Nitrotoluene degradation [PATH:ko00633]	3
macB; macrolide transport system ATP-binding/permease protein [EC:3.6.3.-]	0.966667	0.000334462	Environmental Information Processing	Membrane transport	02010 ABC transporters [PATH:ko02010]	3
aapP, bztD; general L-amino acid transport system ATP-binding protein [EC:3.6.3.-]	0.966667	0.000334462	Environmental Information Processing	Membrane transport	02010 ABC transporters [PATH:ko02010]	3
aapQ, bztB; general L-amino acid transport system permease protein	0.966667	0.000334462	Environmental Information Processing	Membrane transport	02010 ABC transporters [PATH:ko02010]	3
cckA; two-component system, cell cycle sensor histidine kinase and response regulator CckA [EC:2.7.13.3]	0.966667	0.000334462	Cellular Processes	Cell growth and death	04112 Cell cycle - Caulobacter [PATH:ko04112]	3
pleD; two-component system, cell cycle response regulator	0.966667	0.000334462	Cellular Processes	Cell growth and death	04112 Cell cycle - Caulobacter [PATH:ko04112]	3
ABC.GGU.A, gguA; putative multiple sugar transport system ATP-binding protein	0.966667	0.000334462	Environmental Information Processing	Membrane transport	02010 ABC transporters [PATH:ko02010]	3
fliD; flagellar hook-associated protein 2	0.966667	0.000334462	Cellular Processes	Cell motility	02040 Flagellar assembly [PATH:ko02040]	3
E2.5.1.26, AGPS; alkyldihydroxyacetonephosphate synthase [EC:2.5.1.26]	0.966667	0.000334462	Cellular Processes	Transport and catabolism	04146 Peroxisome [PATH:ko04146]	3
ABC-2.LPSE.P; lipopolysaccharide transport system permease protein	0.966667	0.000334462	Environmental Information Processing	Membrane transport	02010 ABC transporters [PATH:ko02010]	3
frcB; fructose transport system substrate-binding protein	0.966667	0.000334462	Environmental Information Processing	Membrane transport	02010 ABC transporters [PATH:ko02010]	3
gluB; glutamate transport system substrate-binding protein	0.966667	0.000334462	Environmental Information Processing	Membrane transport	02010 ABC transporters [PATH:ko02010]	3
modA; molybdate transport system substrate-binding protein	0.966667	0.000334462	Environmental Information Processing	Membrane transport	02010 ABC transporters [PATH:ko02010]	3
nodI; lipooligosaccharide transport system ATP-binding protein	0.966667	0.000334462	Environmental Information Processing	Membrane transport	02010 ABC transporters [PATH:ko02010]	3
phnC; phosphonate transport system ATP-binding protein [EC:3.6.3.28]	0.966667	0.000334462	Environmental Information Processing	Membrane transport	02010 ABC transporters [PATH:ko02010]	3
xylH; D-xylose transport system permease protein	0.966667	0.000334462	Environmental Information Processing	Membrane transport	02010 ABC transporters [PATH:ko02010]	3
yejA; microcin C transport system substrate-binding protein	0.966667	0.000334462	Environmental Information Processing	Membrane transport	02010 ABC transporters [PATH:ko02010]	3
E1.14.13.50; pentachlorophenol monooxygenase [EC:1.14.13.50]	0.966667	0.000334462	Metabolism	Xenobiotics biodegradation and metabolism	00361 Chlorocyclohexane and chlorobenzene degradation [PATH:ko00361]	3
baeS; two-component system, OmpR family, sensor histidine kinase BaeS [EC:2.7.13.3]	0.966667	0.000334462	Environmental Information Processing	Signal transduction	02020 Two-component system [PATH:ko02020]	3
csrA; carbon storage regulator	0.966667	0.000334462	Environmental Information Processing	Signal transduction	02020 Two-component system [PATH:ko02020]	3
cydB; cytochrome d ubiquinol oxidase subunit II [EC:1.10.3.-]	0.966667	0.000334462	Environmental Information Processing	Signal transduction	02020 Two-component system [PATH:ko02020]	3
dctA; aerobic C4-dicarboxylate transport protein	0.966667	0.000334462	Environmental Information Processing	Signal transduction	02020 Two-component system [PATH:ko02020]	3
pcaH; protocatechuate 3,4-dioxygenase, beta subunit [EC:1.13.11.3]	0.966667	0.000334462	Metabolism	Xenobiotics biodegradation and metabolism	00362 Benzoate degradation [PATH:ko00362]	3
pcaJ; 3-oxoadipate CoA-transferase, beta subunit [EC:2.8.3.6]	0.966667	0.000334462	Metabolism	Xenobiotics biodegradation and metabolism	00362 Benzoate degradation [PATH:ko00362]	3
nudH; putative (di)nucleoside polyphosphate hydrolase [EC:3.6.1.-]	0.966667	0.000334462	Genetic Information Processing	Folding, sorting and degradation	03018 RNA degradation [PATH:ko03018]	3
[truncated: 84 more rows]
