# Supplementary material for: The Biogeography of Dust in the Eastern Mediterranean
Source: Research Square preprint supplement (doi:10.21203/rs.3.rs-149876/v1), 2021-01-25
Supplement: Supplementary file 5 [file d19751a816abac9d9a161b13.xlsx]

## Sheet: ko2trait_full
level1	level2	level3	gene	KO	Functional category	Beijing_smog_1	Beijing_smog_2	Beijing_smog_3	Beijing_smog_4	Beijing_smog_5	Beijing_smog_6	Beijing_smog_7	Dust_2	Dust_3	Dust_4	Dust_5	Dust_6	Dust_7	Dust_8	Dust_9	Dust_10	Dust_Red_Sea_1	Dust_Red_Sea_2	Dust_Red_Sea_3	Dust_Red_Sea_4	Dust_Red_Sea_5	Dust_Red_Sea_6	Dust_Red_Sea_7	Dust_Red_Sea_8	Cloud_1	Cloud_2	Cloud_3	Urban_1	Urban_2	Urban_3	Urban_4	Red_Sea_1	Red_Sea_2	Red_Sea_3	Red_Sea_4	Med_Sea_E1	Med_Sea_E2	Med_Sea_E3	Med_Sea_W1	Med_Sea_W2	Med_Sea_W3	IL_soils_1	IL_soils_2	IL_soils_3
Environmental Information Processing	Signal transduction	02020 Two-component system [PATH:ko02020]	bceS; two-component system, OmpR family, bacitracin resistance sensor histidine kinase BceS [EC:2.7.13.3]	K11629	Bacitracin resistance	5.7e-07	1.77e-06	5.18e-06	2.09e-07	3.84e-06	7.27e-07	5.4e-06	4.09e-05	3.52e-05	2.86e-05	1.5e-05	1.08e-05	0	3.87e-06	4.96e-06	2.31e-06	1.12e-05	2.24e-05	1.21e-05	4.44e-05	3.97e-06	1.69e-05	7.9e-06	0	0	0	0	0	0	0	0	0	0	0	0	0	0	0	0	0	0	0	0	0
Environmental Information Processing	Signal transduction	02020 Two-component system [PATH:ko02020]	bceR; two-component system, OmpR family, bacitracin resistance response regulator BceR	K11630	Bacitracin resistance	3.42e-06	5.67e-06	7.89e-06	8.37e-06	1.67e-05	8.9e-06	1.65e-05	6.49e-05	6.66e-05	4.16e-05	6.39e-05	4.32e-06	0	0	0	6.92e-06	4.07e-06	2.63e-05	1.97e-05	5.73e-05	5.61e-06	3.72e-05	3.16e-05	4.93e-06	0	0	0	0	0	0	0	0	0	0	0	0	0	0	0	0	0	0	0	0
Environmental Information Processing	Membrane transport	02010 ABC transporters [PATH:ko02010]	bceB; bacitracin transport system permease protein	K11632	Bacitracin resistance	3.42e-06	6.03e-06	1.06e-05	6.49e-06	7.9e-06	4.72e-06	7.02e-06	5.29e-05	7.83e-05	9.89e-05	7.89e-05	0	0	0	7.44e-06	1.38e-05	1.73e-05	3.96e-05	2.52e-05	5.87e-05	1.21e-05	4.23e-05	6.72e-05	9.85e-06	0	0	0	0	0	0	0	0	0	0	0	0	0	0	6.38e-06	0	0	0	0	2.23e-06
Environmental Information Processing	Membrane transport	02010 ABC transporters [PATH:ko02010]	bceA; bacitracin transport system ATP-binding protein	K11631	Bacitracin resistance	1.71e-06	6.74e-06	1.26e-05	7.32e-06	1.11e-05	3.63e-07	1.11e-05	9.13e-05	7.83e-05	8.33e-05	7.14e-05	2.16e-06	5.28e-06	7.75e-06	1.24e-05	2.08e-05	9.16e-06	3.47e-05	1.65e-05	6.88e-05	7.48e-06	5.75e-05	6.85e-05	8.21e-06	0	0	0	0	0	0	0	5.32e-06	3.34e-06	4e-06	6.59e-06	0	2.44e-05	0	6.38e-06	2.77e-06	1.86e-05	1.06e-06	2.58e-06	2.23e-06
Environmental Information Processing	Signal transduction	02020 Two-component system [PATH:ko02020]	ompF; outer membrane pore protein F	K09476	Beta-lactam resistance	5.7e-07	6.03e-06	1.9e-05	6.7e-06	3.84e-06	6.54e-06	5.94e-06	2.16e-05	3.92e-06	0	1.13e-05	0	0	0	2.48e-06	0	2.04e-06	2.27e-06	2.19e-06	4.3e-06	2.34e-07	3.38e-06	0	3.28e-06	0	0	0	0	0	0	0	9.32e-08	0	0	0	0	0	0	0	2.77e-06	0	0	0	2.23e-06
Environmental Information Processing	Signal transduction	02020 Two-component system [PATH:ko02020]	ompC; outer membrane pore protein C	K09475	Beta-lactam resistance	1.14e-06	5.67e-06	1.26e-05	5.02e-06	8.33e-06	1.49e-05	7.29e-06	4.81e-06	7.83e-06	5.2e-06	0	0	0	0	0	0	3.05e-06	1.95e-06	0	7.16e-06	1.17e-06	1.69e-06	0	4.93e-06	0	0	0	0	0	7.2e-05	0	0	0	0	0	0	0	0	6.38e-06	0	0	5.29e-07	0	0
Metabolism	Glycan biosynthesis and metabolism	00550 Peptidoglycan biosynthesis [PATH:ko00550]	pbpA; penicillin-binding protein 1 [EC:3.4.-.-]	K12552	Beta-lactam resistance	0	4.61e-06	1.45e-05	4.6e-06	2.35e-06	1.16e-05	1.38e-05	3.84e-05	7.05e-05	6.25e-05	6.76e-05	0	0	7.75e-06	7.44e-06	4.62e-06	7.13e-06	2.47e-05	2.3e-05	4.01e-05	2.57e-06	3.04e-05	2.24e-05	4.93e-06	0	0	0	3.14e-05	0	0	0	0	0	4.55e-08	0	0	0	0	0	0	0	0	0	0
Metabolism	Glycan biosynthesis and metabolism	00550 Peptidoglycan biosynthesis [PATH:ko00550]	pbp3; penicillin-binding protein 3 [EC:3.4.-.-]	K12553	Beta-lactam resistance	3.42e-06	5.67e-06	1.18e-05	1.03e-05	8.33e-06	9.26e-06	8.1e-06	6.49e-05	7.05e-05	6.25e-05	4.13e-05	0	2.64e-06	2.32e-05	9.92e-06	2.31e-06	1.43e-05	2.92e-05	1.54e-05	5.01e-05	4.44e-06	3.38e-05	4.74e-05	4.93e-06	0	0	0	0	0	0	0	0	0	0	0	0	0	0	0	0	0	0	0	0
Human Diseases	Infectious diseases	05111 Vibrio cholerae pathogenic cycle [PATH:ko05111]	ompU; outer membrane protein OmpU	K08720	Beta-lactam resistance	0	0	0	0	0	3.63e-07	0	4.81e-06	0	0	3.76e-06	2.16e-06	0	0	0	0	6.11e-06	2.6e-06	5.48e-06	4.3e-06	1.64e-06	3.38e-06	1.32e-05	7.88e-05	0	0	0	0	0	0	0	9.7e-06	1.06e-05	1.27e-05	1.26e-05	2.28e-05	5.41e-06	5.64e-06	1.28e-05	2.77e-06	0	0	0	0
Environmental Information Processing	Signal transduction	02020 Two-component system [PATH:ko02020]	E3.5.2.6, ampC, penP; beta-lactamase [EC:3.5.2.6]	K01467	Beta-lactam resistance	0.000208	0.000195	0.000167	0.000194	0.000173	0.000189	0.000182	0.000449	0.00027	0.000403	0.000413	0.000525	0.000547	0.000538	0.00062	0.000662	0.000576	0.000431	0.000462	0.000384	0.000455	0.000369	0.000598	0.00102791	0	0	4.78e-05	0.000282	0	0.00036	4.38e-05	2.4e-05	4.28e-05	0.000134	9.3e-05	6.56e-05	2.44e-05	0.000147	0.000112	7.49e-05	5.97e-05	0.000464	0.000471	0.000473
Environmental Information Processing	Signal transduction	02020 Two-component system [PATH:ko02020]	yxdL; putative ABC transport system ATP-binding protein	K11635	CAMP resistance	0	1.42e-06	3.7e-06	4.19e-07	1.28e-06	0	2.7e-07	0	7.83e-06	1.82e-05	0	0	0	0	2.48e-06	4.62e-06	3.05e-06	4.87e-06	0	4.3e-06	2.1e-06	6.76e-06	1.05e-05	1.64e-06	0	0	0	0	0	0	0.000132	8.39e-07	2.48e-07	5.91e-07	8.64e-07	0	0	0	0	0	0	1.06e-06	1.29e-06	0
Environmental Information Processing	Signal transduction	02020 Two-component system [PATH:ko02020]	basS; two-component system, OmpR family, sensor histidine kinase BasS [EC:2.7.13.3]	K07643	CAMP resistance	2.85e-06	1.77e-06	8.87e-06	2.09e-06	2.56e-06	4.72e-06	6.48e-06	9.61e-06	0	0	0	2.16e-06	5.28e-06	0	0	0	0	2.6e-06	0	4.3e-06	1.64e-06	3.38e-06	1.32e-06	0	0	0	0	0	0	0	0	0	0	0	0	0	0	0	0	0	0	5.29e-07	0	0
Human Diseases	Infectious diseases	05150 Staphylococcus aureus infection [PATH:ko05150]	aur; aureolysin [EC:3.4.24.29]	K01401	CAMP resistance	0	0	1.48e-06	0	0	7.27e-06	1.08e-06	3.36e-05	2.74e-05	1.56e-05	1.5e-05	1.3e-05	0	7.75e-06	0	4.62e-06	0	5.2e-06	6.58e-06	7.16e-06	3.04e-06	5.07e-06	2.63e-06	3.28e-06	0	0	0	0	0	0	0	1.86e-07	1.24e-07	1.36e-07	1.08e-07	0	2.71e-06	1.13e-05	6.38e-06	0	0	4.23e-06	5.16e-06	1.11e-05
Human Diseases	Infectious diseases	05150 Staphylococcus aureus infection [PATH:ko05150]	dltC; D-alanine--poly(phosphoribitol) ligase subunit 2 [EC:6.1.1.13]	K14188	CAMP resistance	5.7e-07	2.13e-06	5.92e-06	5.02e-06	5.98e-06	1.07e-05	1.13e-05	1.44e-05	2.74e-05	2.6e-06	7.51e-06	0	0	0	4.96e-06	4.62e-06	0	2.92e-06	3.29e-06	8.6e-06	0	5.07e-06	6.59e-06	3.28e-06	0	0	0	0	0	0	0	0	0	0	0	0	0	0	3.19e-06	0	0	0	2.58e-06	0
Environmental Information Processing	Signal transduction	02020 Two-component system [PATH:ko02020]	basR; two-component system, OmpR family, response regulator BasR	K07771	CAMP resistance	0	3.19e-06	1.01e-05	3.98e-06	2.56e-06	7.27e-06	4.32e-06	1.2e-05	1.57e-05	5.2e-06	3.76e-06	6.48e-06	7.92e-06	3.87e-06	9.92e-06	4.62e-06	2.04e-06	9.09e-06	7.68e-06	4.3e-06	5.61e-06	5.07e-06	1.32e-05	5.75e-05	0	0	0	3.14e-05	0	0	0	9.32e-08	1.11e-06	7.73e-07	1.35e-06	0	5.41e-06	5.64e-06	6.38e-06	2.77e-06	0	1e-05	1.16e-05	6.68e-06
Environmental Information Processing	Signal transduction	02020 Two-component system [PATH:ko02020]	cpxA; two-component system, OmpR family, sensor histidine kinase CpxA [EC:2.7.13.3]	K07640	CAMP resistance	2.28e-06	9.57e-06	2.37e-05	2.53e-05	7.47e-06	2.03e-05	1.62e-05	1.68e-05	0	1.3e-05	2.63e-05	0	0	7.75e-06	0	9.23e-06	1.63e-05	6.17e-06	6.58e-06	1.15e-05	6.54e-06	2.03e-05	1.05e-05	1.64e-06	8.44e-05	0	0	0	0	0	0	9.32e-07	1.61e-06	3.73e-06	3.62e-06	0	5.41e-06	5.64e-06	6.38e-05	5.55e-06	0	2.59e-05	1.94e-05	2.34e-05
Human Diseases	Infectious diseases	05150 Staphylococcus aureus infection [PATH:ko05150]	dltB; membrane protein involved in D-alanine export	K03739	CAMP resistance	6.27e-06	1.99e-05	3.89e-05	2.2e-05	1.96e-05	3.58e-05	4.86e-05	6.73e-05	5.48e-05	4.16e-05	1.5e-05	0	0	0	7.44e-06	0	4.07e-06	8.77e-06	1.1e-05	2.29e-05	3.04e-06	3.38e-05	1.05e-05	1.64e-06	0	0	0	0	0	0	0	1.12e-06	3.71e-07	6.37e-07	3.78e-07	0	0	1.13e-05	0	0	0	5.81e-06	3.87e-06	6.68e-06
Human Diseases	Infectious diseases	05150 Staphylococcus aureus infection [PATH:ko05150]	dltD; D-alanine transfer protein	K03740	CAMP resistance	3.42e-06	2.52e-05	4.14e-05	1.86e-05	3.4e-05	3.87e-05	5.99e-05	4.33e-05	8.22e-05	2.86e-05	1.5e-05	0	0	3.87e-06	0	1.62e-05	2.04e-06	3.9e-06	1.21e-05	2.58e-05	7.01e-07	8.45e-06	2.24e-05	3.28e-06	0	0	0	0	7.37e-05	0	0	0	0	0	0	0	0	0	0	0	0	0	0	0
Environmental Information Processing	Signal transduction	02020 Two-component system [PATH:ko02020]	phoQ; two-component system, OmpR family, sensor histidine kinase PhoQ [EC:2.7.13.3]	K07637	CAMP resistance	4.56e-06	1.03e-05	2.54e-05	1.11e-05	9.61e-06	2.87e-05	1.16e-05	3.36e-05	1.96e-05	2.86e-05	2.63e-05	0	2.64e-06	7.75e-06	1.24e-05	4.62e-06	2.14e-05	2.99e-05	2.08e-05	3.72e-05	1.07e-05	4.23e-05	0.000186	0.000271	0	0	0	0	0	0	0	8.39e-07	2.1e-06	1.91e-06	1.57e-06	1.71e-05	5.41e-06	1.69e-05	0.000108	5.55e-06	3.73e-06	1.8e-05	1.42e-05	3.56e-05
Human Diseases	Infectious diseases	05150 Staphylococcus aureus infection [PATH:ko05150]	dltA; D-alanine--poly(phosphoribitol) ligase subunit 1 [EC:6.1.1.13]	K03367	CAMP resistance	1.08e-05	3.08e-05	4.21e-05	3.22e-05	3.14e-05	5.27e-05	7.56e-05	7.93e-05	7.83e-05	5.72e-05	2.25e-05	0	0	3.87e-06	2.48e-06	1.85e-05	8.14e-06	9.74e-06	1.43e-05	3.29e-05	1.4e-06	2.03e-05	3.16e-05	1.97e-05	0	6.72e-05	0	0	0	0	0	1.31e-06	1.11e-06	1e-06	7.02e-07	0	0	0	9.56e-06	0	0	1.11e-05	5.16e-06	6.68e-06
Environmental Information Processing	Signal transduction	02020 Two-component system [PATH:ko02020]	phoP; two-component system, OmpR family, response regulator PhoP	K07660	CAMP resistance	3.08e-05	2.2e-05	4.12e-05	1.86e-05	2.46e-05	3.18e-05	1.7e-05	2.4e-05	1.57e-05	0	1.13e-05	0	1.32e-05	1.16e-05	4.96e-06	2.08e-05	2.65e-05	2.05e-05	2.63e-05	3.29e-05	1.52e-05	2.03e-05	0.000146	0.000143	0	0	0	0	0	0	0	2.7e-06	5.82e-06	3.91e-06	2.32e-06	3.71e-05	2.16e-05	0.000102	9.56e-05	4.72e-05	1.86e-05	1.74e-05	1.55e-05	4.56e-05
Environmental Information Processing	Signal transduction	02020 Two-component system [PATH:ko02020]	arnB, pmrH; UDP-4-amino-4-deoxy-L-arabinose-oxoglutarate aminotransferase [EC:2.6.1.87]	K07806	CAMP resistance	5.7e-07	2.13e-06	1.87e-05	4.6e-06	2.14e-06	8.36e-06	4.32e-06	1.68e-05	3.92e-06	1.04e-05	3.76e-06	1.3e-05	1.06e-05	3.87e-06	9.92e-06	1.62e-05	1.53e-05	1.88e-05	1.75e-05	2.15e-05	1.57e-05	6.76e-06	0.000249	0.000378	0	0	0	0	0	0	0	1.35e-05	1.29e-05	1.29e-05	1.54e-05	2.85e-06	1.62e-05	0	2.55e-05	1.11e-05	0	4.6e-05	4.9e-05	2.23e-05
Environmental Information Processing	Signal transduction	02020 Two-component system [PATH:ko02020]	cpxR; two-component system, OmpR family, response regulator CpxR	K07662	CAMP resistance	4.56e-06	1.06e-05	1.43e-05	6.7e-06	1e-05	9.08e-06	1.86e-05	2.88e-05	2.35e-05	2.86e-05	3.01e-05	8.64e-06	1.85e-05	1.94e-05	2.73e-05	1.38e-05	3.87e-05	3.05e-05	2.85e-05	3.44e-05	3.29e-05	4.06e-05	0.000104	0.000166	0	0	0	6.28e-05	0	0	0.000395	6.43e-06	5.08e-06	1.16e-05	1.75e-05	3.99e-05	1.89e-05	6.21e-05	7.65e-05	1.39e-05	7.46e-06	9.04e-05	7.74e-05	8.01e-05
Human Diseases	Infectious diseases	05150 Staphylococcus aureus infection [PATH:ko05150]	mprF, fmtC; phosphatidylglycerol lysyltransferase [EC:2.3.2.3]	K14205	CAMP resistance	2.51e-05	1.91e-05	4.04e-05	3.45e-05	1.99e-05	5.8e-05	5.29e-05	0.000149	0.000141	8.85e-05	4.51e-05	5.19e-05	1.32e-05	3.87e-05	5.7e-05	6.69e-05	6.92e-05	4.19e-05	4.72e-05	6.59e-05	3.25e-05	5.24e-05	0.00037	0.000744	0	0	0	0	2.46e-05	0	4.38e-05	3.73e-07	0	0	8.64e-07	1.14e-05	2.71e-06	0	9.56e-06	3.05e-05	0	6.24e-05	4.9e-05	6.45e-05
Environmental Information Processing	Signal transduction	02020 Two-component system [PATH:ko02020]	degP, htrA; serine protease Do [EC:3.4.21.107]	K04771	CAMP resistance	3.42e-06	5.32e-06	8.38e-06	8.79e-06	9.4e-06	1.58e-05	2.43e-05	2.88e-05	4.31e-05	3.12e-05	3.76e-05	3.89e-05	4.49e-05	2.32e-05	7.93e-05	6.23e-05	7.43e-05	5.85e-05	6.91e-05	6.16e-05	4.18e-05	6.26e-05	2.5e-05	1.15e-05	0	0	0	0.000188	0	0.000144	4.38e-05	5.28e-05	4.32e-05	6.32e-05	6.7e-05	7.13e-05	9.47e-05	9.59e-05	0.000105	6.66e-05	5.97e-05	0.000106	0.000139	0.000127
Environmental Information Processing	Membrane transport	02010 ABC transporters [PATH:ko02010]	macB; macrolide transport system ATP-binding/permease protein [EC:3.6.3.-]	K05685	Macrolide resistance	1.48e-05	4.54e-05	7.99e-05	3.81e-05	5.72e-05	8.01e-05	6.59e-05	0.000168	0.000114	0.000109	0.000147	0.000145	0.000193	0.000124	8.93e-05	0.000122	0.000276	0.000192	0.000194	0.000241	0.000209	0.000215	0.000732	0.0011954	0	0	0	6.28e-05	0	7.2e-05	0	5.08e-05	5.42e-05	6.54e-05	7.46e-05	5.42e-05	4.06e-05	0.000119	0.000112	4.72e-05	4.47e-05	0.000412	0.000476	0.000471
Environmental Information Processing	Signal transduction	02020 Two-component system [PATH:ko02020]	ompF; outer membrane pore protein F	K09476	Multi-drug resistance	5.7e-07	6.03e-06	1.9e-05	6.7e-06	3.84e-06	6.54e-06	5.94e-06	2.16e-05	3.92e-06	0	1.13e-05	0	0	0	2.48e-06	0	2.04e-06	2.27e-06	2.19e-06	4.3e-06	2.34e-07	3.38e-06	0	3.28e-06	0	0	0	0	0	0	0	9.32e-08	0	0	0	0	0	0	0	2.77e-06	0	0	0	2.23e-06
Environmental Information Processing	Signal transduction	02020 Two-component system [PATH:ko02020]	evgA, bvgA; two-component system, NarL family, response regulator EvgA	K07690	Multi-drug resistance	2.85e-06	3.55e-06	7.64e-06	1.05e-06	7.9e-06	3.45e-06	7.83e-06	1.44e-05	0	5.2e-06	7.51e-06	4.32e-06	5.28e-06	3.87e-06	7.44e-06	2.31e-06	1.02e-06	2.6e-06	2.19e-06	4.3e-06	0	5.07e-06	0.000263	0.000481	0	0	0	9.41e-05	0	0	0	9.32e-08	0	4.55e-08	0	0	0	0	3.19e-06	0	0	6.34e-06	1.68e-05	4.45e-06
Environmental Information Processing	Signal transduction	02020 Two-component system [PATH:ko02020]	mdtA; putative multidrug efflux transporter MdtA	K07799	Multi-drug resistance	6.27e-06	1.91e-05	3.23e-05	2.24e-05	1.11e-05	2.71e-05	1.78e-05	6.01e-05	3.52e-05	4.42e-05	3.01e-05	1.94e-05	2.64e-05	2.32e-05	1.24e-05	3e-05	7.94e-05	5.42e-05	6.03e-05	5.87e-05	5.7e-05	2.87e-05	0.000223	0.000519	1.69e-05	0	0	0	7.37e-05	7.2e-05	0	9.32e-08	4.95e-07	3.64e-07	9.72e-07	0	0	0	9.56e-06	1.66e-05	0	0.00023	0.00021	0.000235
Environmental Information Processing	Signal transduction	02020 Two-component system [PATH:ko02020]	mdtC; RND superfamily, multidrug transport protein MdtC	K07789	Multi-drug resistance	4.73e-05	5.71e-05	0.000136	6.82e-05	8.39e-05	0.000132	5.13e-05	0.000139	0.000188	0.000107	0.000101	3.46e-05	4.75e-05	3.87e-05	0.000104	9.23e-05	0.000227	0.000159	0.000207	0.000136	0.000155	0.000123	0.000677	0.00147783	0	0	0	0.000188	7.37e-05	0.000216	0	1.21e-06	5.82e-06	9.23e-06	6.54e-06	2.85e-06	1.35e-05	2.26e-05	1.59e-05	2.5e-05	3.73e-06	0.000566	0.000533	0.000587
Environmental Information Processing	Signal transduction	02020 Two-component system [PATH:ko02020]	mdtB; RND superfamily, multidrug transport protein MdtB	K00788	Multi-drug resistance	0.000156	0.000135	0.000151	0.00013	0.000121	0.000145	9.04e-05	0.000111	0.000125	7.29e-05	7.89e-05	6.7e-05	3.96e-05	5.42e-05	7.44e-05	9.69e-05	0.000293	0.000175	0.000186	0.000179	0.000171	0.000181	0.000543	0.00102463	0	0	0	0.000251	0	0.000144	0.000307	2.98e-06	6.19e-06	2.09e-06	7.67e-06	0	2.71e-06	5.64e-06	3.19e-06	2.22e-05	0	0.000569	0.000705	0.000645
Environmental Information Processing	Signal transduction	02020 Two-component system [PATH:ko02020]	vraS; two-component system, NarL family, vancomycin resistance sensor histidine kinase VraS [EC:2.7.13.3]	K07681	Vancomycin resistance	0	7.45e-06	3.94e-06	2.51e-06	4.7e-06	5.63e-06	1.24e-05	3.12e-05	3.92e-05	3.12e-05	1.5e-05	0	0	0	1.98e-05	6.92e-06	6.11e-06	5.52e-06	9.87e-06	1.29e-05	4.44e-06	6.76e-06	7.9e-06	1.64e-06	0	0	0	0	0	0	0	0	0	0	0	0	0	0	0	0	0	5.29e-07	1.29e-06	0
Environmental Information Processing	Signal transduction	02020 Two-component system [PATH:ko02020]	vraR; two-component system, NarL family, vancomycin resistance associated response regulator VraR	K07694	Vancomycin resistance	0	1.06e-06	4.68e-06	6.49e-06	0	4.18e-06	7.56e-06	1.92e-05	3.92e-06	2.34e-05	1.5e-05	2.16e-05	2.38e-05	1.16e-05	0	6.92e-06	4.07e-06	1.07e-05	9.87e-06	8.6e-06	5.14e-06	1.01e-05	7.9e-06	1.64e-06	0	0	0	0	0	0	0	0	0	0	0	0	0	0	3.19e-06	0	0	7.4e-06	5.16e-06	5.56e-06
Metabolism	Amino acid metabolism	00300 Lysine biosynthesis [PATH:ko00300]	murF; UDP-N-acetylmuramoyl-tripeptide--D-alanyl-D-alanine ligase [EC:6.3.2.10]	K01929	Vancomycin resistance	5.59e-05	6.28e-05	0.000137	8.77e-05	0.000107	0.000143	0.000177	0.000935	0.00083	0.00095	0.000864	0.000748	0.000903	0.000872	0.000789	0.000852	0.000952	0.00113205	0.0011078	0.00104434	0.00110789	0.00122409	0.00104192	0.000701	6.75e-05	0	0.00117141	0.00022	4.92e-05	0.000504	0.000132	0.00131024	0.00113231	0.00117859	0.00110852	0.000996	0.000869	0.0007	0.000956	0.000463	0.000861	0.000838	0.000819	0.000879
Metabolism	Glycan biosynthesis and metabolism	00550 Peptidoglycan biosynthesis [PATH:ko00550]	ddl; D-alanine-D-alanine ligase [EC:6.3.2.4]	K01921	Vancomycin resistance	0.000407	0.00038	0.000365	0.000484	0.000443	0.000475	0.000558	0.00128325	0.00108858	0.00145204	0.00143124	0.00165715	0.00179876	0.00175474	0.00149023	0.00143344	0.00143749	0.00142822	0.00148621	0.0015658	0.00161417	0.00157408	0.00136332	0.00143185	0.000253	0	0	0.000188	9.83e-05	0.000576	0.00057	0.000952	0.000899	0.000906	0.000856	0.0010212	0.00059	0.000976	0.000953	0.000652	0.000824	0.00156918	0.00155122	0.00164215
Metabolism	Glycan biosynthesis and metabolism	00550 Peptidoglycan biosynthesis [PATH:ko00550]	mraY; phospho-N-acetylmuramoyl-pentapeptide-transferase [EC:2.7.8.13]	K01000	Vancomycin resistance	0.000952	0.00120118	0.00113624	0.00112997	0.000953	0.00115447	0.00100698	0.000968	0.00100635	0.00118141	0.00105558	0.00128337	0.00113578	0.00116595	0.00117285	0.00120492	0.00102925	0.0011051	0.00115825	0.00126066	0.00105625	0.00117675	0.000985	0.000635	0.000489	1.68e-05	0	0.000941	0.00059	0.000648	0.000877	0.00145496	0.00134896	0.00149379	0.00142371	0.00158314	0.0015478	0.00126975	0.00134214	0.00114326	0.00158077	0.00128378	0.00112922	0.00113593
Metabolism	Biosynthesis of other secondary metabolites	00311 Penicillin and cephalosporin biosynthesis [PATH:ko00311]	cmcH; hydroxymethyl cephem carbamoyltransferase [EC:2.1.3.7]	K04128	Penicillin and cephalosporin biosynthesis	0	0	0	0	0	0	0	4.81e-06	3.92e-06	0	7.51e-06	2.16e-06	0	3.87e-06	4.96e-06	6.92e-06	3.05e-06	1.62e-06	1.1e-06	0	1.17e-06	0	0	0	0	0	0	0	0	0	0	4.94e-06	1.73e-06	6.37e-07	8.1e-07	2.85e-06	0	0	0	0	0	3.7e-06	6.45e-06	0
Metabolism	Biosynthesis of other secondary metabolites	00311 Penicillin and cephalosporin biosynthesis [PATH:ko00311]	E2.3.1.164; isopenicillin-N N-acyltransferase [EC:2.3.1.164]	K10852	Penicillin and cephalosporin biosynthesis	2.85e-06	3.55e-07	3.7e-06	2.09e-06	7.47e-06	3.09e-06	3.51e-06	5.29e-05	3.92e-05	3.64e-05	3.76e-05	2.59e-05	1.06e-05	2.71e-05	3.47e-05	5.77e-05	3.05e-05	1.98e-05	2.85e-05	2.58e-05	2.45e-05	3.04e-05	3.16e-05	0.00019	3.37e-05	0	0	0.00022	0.000147	0	0	2.8e-07	4.95e-07	2.09e-06	9.72e-07	5.71e-06	0	5.64e-06	3.83e-05	0	3.73e-06	2.48e-05	2.45e-05	3.78e-05
Metabolism	Biosynthesis of other secondary metabolites	00311 Penicillin and cephalosporin biosynthesis [PATH:ko00311]	E1.21.3.1; isopenicillin-N synthase [EC:1.21.3.1]	K04126	Penicillin and cephalosporin biosynthesis	2.85e-06	0	2.46e-06	1.26e-06	1.07e-06	1.63e-06	2.7e-07	7.21e-06	1.57e-05	2.6e-06	7.51e-06	0	0	0	4.96e-06	2.31e-06	3.05e-06	4.22e-06	5.48e-06	5.73e-06	3.74e-06	0	3.95e-06	0	0	0	0	0	0	7.2e-05	0	3.81e-05	4.35e-05	4.63e-05	4.78e-05	9.13e-05	9.74e-05	8.46e-05	8.61e-05	9.43e-05	0.000164	4.76e-06	6.45e-06	6.68e-06
Metabolism	Biosynthesis of other secondary metabolites	00311 Penicillin and cephalosporin biosynthesis [PATH:ko00311]	E3.1.1.41; cephalosporin-C deacetylase [EC:3.1.1.41]	K01060	Penicillin and cephalosporin biosynthesis	1.71e-05	8.15e-06	1.48e-05	1.03e-05	1.13e-05	5.27e-06	1.19e-05	9.13e-05	0.000121	0.000133	0.000105	0.000123	0.000111	0.000136	6.69e-05	0.000143	0.000119	0.000152	0.000149	0.00014	0.000169	0.00013	5.53e-05	2.3e-05	0	0	0	0	0	0	0	3.73e-07	1.24e-07	0	5.4e-08	0	0	5.64e-06	4.46e-05	0	0	8.67e-05	4.9e-05	8.68e-05
Metabolism	Biosynthesis of other secondary metabolites	00311 Penicillin and cephalosporin biosynthesis [PATH:ko00311]	cefD; isopenicillin-N epimerase [EC:5.1.1.17]	K04127	Penicillin and cephalosporin biosynthesis	5.7e-07	0	7.39e-07	0	0	0	2.16e-06	3.12e-05	1.57e-05	3.12e-05	7.14e-05	0.000117	0.000116	8.52e-05	2.73e-05	5.31e-05	5.19e-05	3.8e-05	2.85e-05	5.01e-05	7.59e-05	6.93e-05	1.32e-05	1.48e-05	0	0	0	0	0	0	4.38e-05	2.94e-05	2.79e-05	4.14e-05	6.07e-05	3.42e-05	8.12e-06	5.08e-05	4.78e-05	1.66e-05	2.61e-05	0.000133	0.000138	0.000142
Metabolism	Biosynthesis of other secondary metabolites	00311 Penicillin and cephalosporin biosynthesis [PATH:ko00311]	E3.5.1.11; penicillin amidase [EC:3.5.1.11]	K01434	Penicillin and cephalosporin biosynthesis	2.51e-05	9.57e-06	3.8e-05	2.95e-05	2.75e-05	4.94e-05	5.4e-05	0.000507	0.000509	0.000656	0.000548	0.000763	0.000647	0.000701	0.00085	0.000847	0.000915	0.000672	0.000781	0.000642	0.000792	0.000565	0.00132117	0.00179803	0	0	0	6.28e-05	0.000295	0.000216	8.77e-05	0.000133	0.000132	0.000208	0.000247	0.000907	0.000265	0.000649	0.000698	0.000355	0.000276	0.000778	0.000736	0.000827
Metabolism	Biosynthesis of other secondary metabolites	00521 Streptomycin biosynthesis [PATH:ko00521]	strA; streptomycin 6-kinase [EC:2.7.1.72]	K12570	Streptomycin biosynthesis	0	0	0	0	0	0	1.08e-06	0	3.92e-06	0	0	2.16e-06	2.64e-06	0	4.96e-06	6.92e-06	1.02e-06	9.74e-07	1.1e-06	0	3.74e-06	0	0	0	0	0	0	0	0	0	0	0	0	0	0	0	0	0	3.19e-06	0	0	1.06e-06	1.29e-06	0
Metabolism	Biosynthesis of other secondary metabolites	00521 Streptomycin biosynthesis [PATH:ko00521]	stsC; L-glutamine:scyllo-inosose aminotransferase [EC:2.6.1.50]	K05957	Streptomycin biosynthesis	0	0	0	0	0	0	0	0	7.83e-06	0	0	1.08e-05	5.28e-06	0	2.48e-06	0	3.05e-06	1.62e-06	0	0	9.35e-07	3.38e-06	3.95e-06	0	0	0	0	0	0	7.2e-05	0	9.32e-08	0	9.1e-08	4.32e-07	0	0	5.64e-06	6.38e-06	0	0	2.11e-06	3.87e-06	6.68e-06
Metabolism	Biosynthesis of other secondary metabolites	00521 Streptomycin biosynthesis [PATH:ko00521]	strB1; scyllo-inosamine-4-phosphate amidinotransferase 1 [EC:2.1.4.2]	K04340	Streptomycin biosynthesis	0	0	0	0	0	0	0	0	0	0	0	0	0	0	0	0	2.04e-06	6.49e-07	1.1e-06	0	2.34e-07	0	0	0	0	0	0	0	0	7.2e-05	0	2.33e-06	1.73e-06	2.09e-06	2.05e-06	2.85e-06	0	0	3.19e-06	5.55e-06	3.73e-06	0	2.58e-06	0
Metabolism	Biosynthesis of other secondary metabolites	00521 Streptomycin biosynthesis [PATH:ko00521]	rfbC; dTDP-4-dehydrorhamnose 3,5-epimerase [EC:5.1.3.13]	K01790	Streptomycin biosynthesis	0.000217	0.000258	0.000306	0.000311	0.000278	0.000287	0.000413	0.000512	0.000411	0.000684	0.000417	0.000603	0.000568	0.000577	0.000679	0.000605	0.000503	0.000555	0.000608	0.000474	0.00058	0.000531	0.000408	0.000317	0	0	0	3.14e-05	2.46e-05	7.2e-05	0	0.00034	0.000324	0.00038	0.000364	0.000608	0.000344	0.000525	0.000523	0.000266	0.000384	0.000663	0.000639	0.000688
Metabolism	Biosynthesis of other secondary metabolites	00521 Streptomycin biosynthesis [PATH:ko00521]	rfbD; dTDP-4-dehydrorhamnose reductase [EC:1.1.1.133]	K00067	Streptomycin biosynthesis	5.99e-05	7.41e-05	0.000136	0.000111	8.09e-05	0.000154	0.000239	0.000646	0.000889	0.00120483	0.00111193	0.00146486	0.00153199	0.00144098	0.00202086	0.00205899	0.00201676	0.00138048	0.00145659	0.00101712	0.00151791	0.00110743	0.000693	0.000773	0	0	2.39e-05	0.000188	0	0.000216	8.77e-05	0.000181	0.000175	0.000214	0.000178	0.000736	0.000295	0.000474	0.000634	0.000283	0.000343	0.00118441	0.00112405	0.00121047
Metabolism	Biosynthesis of other secondary metabolites	00521 Streptomycin biosynthesis [PATH:ko00521]	E2.7.7.24, rfbA, rffH; glucose-1-phosphate thymidylyltransferase [EC:2.7.7.24]	K00973	Streptomycin biosynthesis	0.00141928	0.00144758	0.00140638	0.00143067	0.00130185	0.00142206	0.0011252	0.000877	0.000811	0.000919	0.000999	0.000959	0.00100372	0.00109623	0.00128443	0.00116106	0.00116465	0.00100573	0.000999	0.000964	0.000948	0.00101444	0.00088	0.000542	0	5.04e-05	0	0.000565	0.000172	0.000288	0.000219	0.000932	0.000835	0.000934	0.000951	0.00150328	0.000666	0.00119074	0.00161631	0.000533	0.00113711	0.00116169	0.00116148	0.00120157
Metabolism	Biosynthesis of other secondary metabolites	00521 Streptomycin biosynthesis [PATH:ko00521]	E4.2.1.46, rfbB, rffG; dTDP-glucose 4,6-dehydratase [EC:4.2.1.46]	K01710	Streptomycin biosynthesis	0.00289162	0.00269769	0.00234347	0.00242881	0.00221844	0.00240141	0.00219776	0.00130969	0.00134702	0.00150148	0.00165663	0.00188616	0.00197045	0.00202589	0.0019068	0.00208207	0.00182333	0.00187896	0.00191726	0.00174057	0.00201438	0.00173639	0.00116179	0.000916	0.000219	0.00047	0.000263	0.00103546	0.000295	0.000792	0.000745	0.00196773	0.00172124	0.00189372	0.001866	0.00226204	0.00124203	0.00218396	0.00215826	0.00123483	0.00139063	0.00246608	0.00255784	0.00244097
Metabolism	Energy metabolism	00720 Carbon fixation pathways in prokaryotes [PATH:ko00720]	mcr; malonyl-CoA reductase / 3-hydroxypropionate dehydrogenase (NADP+) [EC:1.2.1.75 1.1.1.298]	K14468	Anoxygenic photosynthesis in green nonsulfur bacteria	0	0	0	0	0	0	0	0	0	0	3.76e-06	2.16e-06	0	1.16e-05	0	0	0	0	3.29e-06	1.43e-06	2.1e-06	0	0	0	0	0	0	3.14e-05	0	7.2e-05	0	3.17e-06	1.24e-05	8.78e-06	6e-06	3.99e-05	0.000114	2.82e-05	6.69e-05	0.00013	0.00013	5.29e-07	0	5.56e-06
Metabolism	Amino acid metabolism	00280 Valine, leucine and isoleucine degradation [PATH:ko00280]	MCEE, epi; methylmalonyl-CoA/ethylmalonyl-CoA epimerase [EC:5.1.99.1]	K05606	Anoxygenic photosynthesis in green nonsulfur bacteria	5.65e-05	7.91e-05	6.01e-05	6.95e-05	5.57e-05	6.79e-05	5.34e-05	6.01e-05	9.01e-05	6.25e-05	6.76e-05	0.000119	0.000153	0.000163	0.000141	0.000118	0.000103	8.93e-05	9.32e-05	7.02e-05	0.000111	8.28e-05	3.42e-05	4.93e-06	0	0	0	3.14e-05	2.46e-05	7.2e-05	0	6.18e-05	6.92e-05	8.32e-05	8.63e-05	0.000148	0.00017	0.000107	0.000115	0.000125	0.000108	8.24e-05	6.97e-05	5.34e-05
Metabolism	Amino acid metabolism	00280 Valine, leucine and isoleucine degradation [PATH:ko00280]	E5.4.99.2B, mcmA2; methylmalonyl-CoA mutase, C-terminal domain [EC:5.4.99.2]	K01849	Anoxygenic photosynthesis in green nonsulfur bacteria	3.31e-05	0.000131	7.15e-05	0.000134	9.95e-05	0.00013	7.72e-05	6.97e-05	4.31e-05	0.000148	0.000139	0.000337	0.000335	0.000368	0.000307	0.000289	0.000191	0.000169	0.000202	0.000132	0.000232	0.000174	7.64e-05	4.76e-05	0	0	0	6.28e-05	0	0	0	5.25e-05	5.39e-05	8.34e-05	0.000116	1.14e-05	8.12e-06	6.21e-05	6.38e-05	4.16e-05	3.73e-06	0.000372	0.000392	0.000363
Metabolism	Carbohydrate metabolism	00620 Pyruvate metabolism [PATH:ko00620]	accB, bccP; acetyl-CoA carboxylase biotin carboxyl carrier protein	K02160	Anoxygenic photosynthesis in green nonsulfur bacteria	5.25e-05	6.81e-05	6.58e-05	4.9e-05	7.43e-05	5.65e-05	8.34e-05	0.000178	0.000282	0.000252	0.000237	0.000309	0.000272	0.000205	0.00033	0.000295	0.000302	0.000245	0.000246	0.000344	0.000215	0.000223	0.000321	0.000264	0	0	0	0.000157	0	0	0.000175	0.000628	0.000613	0.000557	0.000508	0.000593	0.000517	0.000547	0.000504	0.000377	0.000582	0.000275	0.000305	0.000283
Metabolism	Amino acid metabolism	00280 Valine, leucine and isoleucine degradation [PATH:ko00280]	E5.4.99.2A, mcmA1; methylmalonyl-CoA mutase, N-terminal domain [EC:5.4.99.2]	K01848	Anoxygenic photosynthesis in green nonsulfur bacteria	0.0011757	0.00134299	0.000816	0.00106238	0.000898	0.00082	0.000706	0.000257	0.000462	0.000729	0.000823	0.00196611	0.00198366	0.00147584	0.00134146	0.00145422	0.000842	0.000951	0.00103322	0.000968	0.00120741	0.000845	0.000398	0.000151	5.06e-05	1.68e-05	0	3.14e-05	0	7.2e-05	8.77e-05	0.000282	0.000269	0.000383	0.000531	0.000154	7.58e-05	0.000423	0.000217	7.21e-05	5.59e-05	0.00208818	0.00231005	0.00213835
Metabolism	Carbohydrate metabolism	00620 Pyruvate metabolism [PATH:ko00620]	accC; acetyl-CoA carboxylase, biotin carboxylase subunit [EC:6.4.1.2 6.3.4.14]	K01961	Anoxygenic photosynthesis in green nonsulfur bacteria	0.00169766	0.00143021	0.00135141	0.00133253	0.00119422	0.00130343	0.00126203	0.000827	0.000869	0.000851	0.000879	0.00123584	0.00102221	0.000875	0.0012274	0.00112875	0.00129904	0.0011681	0.0012131	0.00137813	0.00111957	0.00111589	0.00121448	0.00124138	0.000236	5.04e-05	0.000669	0.000439	7.37e-05	0.00072	0.000658	0.00223144	0.00224407	0.00237269	0.00237283	0.00220214	0.00210252	0.00204852	0.00191917	0.00205065	0.00199833	0.00165797	0.00172028	0.00157428
Metabolism	Carbohydrate metabolism	00020 Citrate cycle (TCA cycle) [PATH:ko00020]	E4.2.1.2A, fumA, fumB; fumarate hydratase, class I [EC:4.2.1.2]	K01676	Anoxygenic photosynthesis in green sulfur bacteria	0.00136338	0.00132881	0.00114709	0.00112076	0.00112844	0.0011908	0.000843	0.000411	0.00038	0.000364	0.000233	0.000145	0.00014	0.000159	0.000181	0.000203	0.000394	0.00034	0.000395	0.000378	0.000296	0.000455	0.000599	0.000675	0	0	0	0.000251	4.92e-05	0.000648	0.000395	0.000185	0.000289	0.000259	0.000279	0.000479	0.000955	0.000835	0.000692	0.00107389	0.000902	0.000539	0.000546	0.000585
Metabolism	Carbohydrate metabolism	00620 Pyruvate metabolism [PATH:ko00620]	pps, ppsA; pyruvate, water dikinase [EC:2.7.9.2]	K01007	Anoxygenic photosynthesis in green sulfur bacteria	0.00175072	0.00181169	0.00158803	0.00186822	0.00135033	0.00161662	0.00136243	0.000892	0.000854	0.00133754	0.00145753	0.00196178	0.00185423	0.00194842	0.00116293	0.00129956	0.00104147	0.000974	0.00107599	0.000991	0.00113125	0.00101613	0.00100899	0.00107717	0	5.04e-05	4.78e-05	0.000314	0.000123	0.000792	0.000219	0.000167	0.000173	0.000126	0.000124	0.000322	0.00039	0.000892	0.000905	0.000364	0.000179	0.00170923	0.001568	0.0014252
Metabolism	Carbohydrate metabolism	00020 Citrate cycle (TCA cycle) [PATH:ko00020]	acnB; aconitate hydratase 2 / 2-methylisocitrate dehydratase [EC:4.2.1.3 4.2.1.99]	K01682	Anoxygenic photosynthesis in green sulfur bacteria	0.000691	0.000525	0.000483	0.000473	0.000425	0.000493	0.000636	0.000178	0.000153	0.000141	7.89e-05	4.75e-05	7.92e-05	6.97e-05	4.71e-05	4.15e-05	0.000138	0.000123	0.000124	0.000252	8.78e-05	0.000243	0.000582	0.0009	0.000101	0	0	6.28e-05	4.92e-05	0.00072	0.00057	0.0022541	0.00242234	0.00181191	0.00154379	0.00123514	0.00189957	0.00161399	0.00131026	0.00212558	0.00152857	7.35e-05	8.26e-05	0.000144
Metabolism	Carbohydrate metabolism	00020 Citrate cycle (TCA cycle) [PATH:ko00020]	mdh; malate dehydrogenase [EC:1.1.1.37]	K00024	Anoxygenic photosynthesis in green sulfur bacteria	0.00206218	0.00179999	0.00151729	0.0014562	0.00138044	0.00153814	0.000983	0.000656	0.000897	0.000942	0.000744	0.00149294	0.00132596	0.00123568	0.00124475	0.00117722	0.00107303	0.000966	0.00103322	0.00097	0.00107004	0.000965	0.000632	0.000353	0	1.68e-05	2.39e-05	0.000157	4.92e-05	0.000504	0.00131521	0.00115843	0.00117106	0.00155405	0.00172323	0.00129219	0.00179675	0.00159141	0.00155573	0.00157337	0.0017038	0.00133821	0.00137958	0.00130838
Metabolism	Carbohydrate metabolism	00020 Citrate cycle (TCA cycle) [PATH:ko00020]	PC, pyc; pyruvate carboxylase [EC:6.4.1.1]	K01958	Anoxygenic photosynthesis in green sulfur bacteria	0.00418426	0.00423213	0.00357559	0.00424324	0.0037913	0.00389849	0.00278992	0.0013241	0.00151148	0.00147025	0.00137865	0.00122719	0.00105126	0.00138675	0.00118028	0.00124186	0.00124202	0.00149479	0.00149827	0.00171335	0.00139876	0.00176513	0.00117891	0.00031	0.00291885	0.00270475	0.00160172	0.000377	0.000737	0.0012239	0.0018413	0.000369	0.000363	0.000481	0.000479	0.00122088	0.000782	0.00131489	0.00102972	0.00130143	0.000638	0.000858	0.000827	0.000827
Metabolism	Carbohydrate metabolism	00020 Citrate cycle (TCA cycle) [PATH:ko00020]	sucD; succinyl-CoA synthetase alpha subunit [EC:6.2.1.5]	K01902	Anoxygenic photosynthesis in green sulfur bacteria	0.00269538	0.00228748	0.00199126	0.00203876	0.00177189	0.00200665	0.00138079	0.000687	0.000701	0.000846	0.000849	0.00124664	0.00127313	0.00119694	0.00107118	0.00102949	0.00112597	0.000916	0.00106722	0.00105867	0.00101233	0.00091	0.000747	0.00054	8.44e-05	5.04e-05	4.78e-05	9.41e-05	2.46e-05	0.000648	0.000658	0.00121997	0.00124324	0.00157401	0.00178049	0.0014234	0.0020484	0.0016027	0.00125925	0.00166494	0.00151366	0.00113843	0.00108534	0.00120825
Metabolism	Carbohydrate metabolism	00620 Pyruvate metabolism [PATH:ko00620]	ppc; phosphoenolpyruvate carboxylase [EC:4.1.1.31]	K01595	Anoxygenic photosynthesis in green sulfur bacteria	0.000122	0.000282	0.000472	0.000414	0.000409	0.000462	0.000748	0.000913	0.00111599	0.00109033	0.00102553	0.00164418	0.00153727	0.00171988	0.00154974	0.00153501	0.00172967	0.00146783	0.00163647	0.00144546	0.00167912	0.00156562	0.00171897	0.00224959	0	0	0	0.000126	0.000123	0.000288	0.000438	0.00243155	0.00244661	0.00238328	0.00201157	0.00172007	0.00165874	0.00153498	0.00160355	0.00121263	0.0015584	0.00140586	0.0012673	0.0013195
Metabolism	Carbohydrate metabolism	00020 Citrate cycle (TCA cycle) [PATH:ko00020]	sucC; succinyl-CoA synthetase beta subunit [EC:6.2.1.5]	K01903	Anoxygenic photosynthesis in green sulfur bacteria	0.0018437	0.00249418	0.0021039	0.00228442	0.00223873	0.00214817	0.00169198	0.001	0.000908454	0.00123085	0.00119458	0.00160097	0.00177235	0.00159979	0.00151503	0.00178661	0.00143647	0.00138989	0.00138639	0.00138386	0.00142913	0.00135428	0.00103402	0.000716	0	0	0.000359	0.000251	0.000147	0.000864	0.000877	0.00142894	0.00142263	0.00190213	0.00213035	0.00169439	0.00239747	0.00165913	0.00186178	0.00156782	0.00193868	0.00154539	0.00162349	0.00160988
Environmental Information Processing	Signal transduction	02020 Two-component system [PATH:ko02020]	frdD; fumarate reductase subunit D	K00247	Carbon fixation prokaryotes	1.71e-06	2.48e-06	2.22e-06	8.37e-07	1.49e-06	5.45e-07	0	0	0	0	1.5e-05	4.32e-06	2.64e-06	3.87e-06	4.96e-06	0	4.07e-06	5.85e-06	3.29e-06	1e-05	4.44e-06	1.18e-05	2.63e-06	1.64e-06	0	0	0	0	0	7.2e-05	0	2.61e-06	4.58e-06	4.64e-06	6.27e-06	1.43e-05	1.35e-05	7.34e-05	2.23e-05	2.22e-05	4.47e-05	5.81e-06	1.42e-05	1e-05
Environmental Information Processing	Signal transduction	02020 Two-component system [PATH:ko02020]	frdC; fumarate reductase subunit C	K00246	Carbon fixation prokaryotes	2.85e-06	3.9e-06	3.2e-06	3.77e-06	1.71e-06	5.09e-06	4.86e-06	2.4e-06	1.17e-05	5.2e-06	3.01e-05	4.32e-06	2.64e-06	3.87e-06	0	9.23e-06	1.02e-05	8.12e-06	9.87e-06	2.87e-06	7.71e-06	1.35e-05	1.19e-05	6.57e-06	0	0	0	0	0	0	0	2.7e-06	4.33e-06	5.64e-06	6.48e-06	1.71e-05	1.62e-05	3.95e-05	5.74e-05	2.5e-05	5.22e-05	2.75e-05	2.58e-05	1.22e-05
Environmental Information Processing	Membrane transport	02010 ABC transporters [PATH:ko02010]	cmpB; bicarbonate transport system permease protein	K11951	Carbon fixation prokaryotes	9.07e-05	3.08e-05	1.13e-05	1.59e-05	1.58e-05	1.36e-05	0.000115	2.16e-05	7.83e-06	1.3e-05	2.25e-05	2.38e-05	5.02e-05	1.16e-05	0	4.62e-06	3.05e-06	1.95e-06	2.19e-06	2.87e-06	1.4e-06	5.07e-06	0	0	0	0	0	0	0	0	0	0	0	0	0	0	0	0	0	0	0	2.64e-06	2.58e-06	4.45e-06
Metabolism	Carbohydrate metabolism	00020 Citrate cycle (TCA cycle) [PATH:ko00020]	E4.2.1.2AB, fumB; fumarate hydratase subunit beta [EC:4.2.1.2]	K01678	Carbon fixation prokaryotes	7.42e-06	5.32e-06	1.53e-05	5.86e-06	1.13e-05	1.16e-05	1.35e-05	8.17e-05	7.44e-05	0.000104	9.39e-05	6.91e-05	4.75e-05	3.87e-05	5.7e-05	6.69e-05	3.66e-05	7.76e-05	4.72e-05	4.3e-05	2.71e-05	0.000101	8.56e-05	2.46e-05	0	0	0	0	0	0	0	0	1.24e-07	9.1e-08	0	0	0	0	2.55e-05	0	0	3.17e-05	2.58e-05	3e-05
Environmental Information Processing	Membrane transport	02010 ABC transporters [PATH:ko02010]	cmpA; bicarbonate transport system substrate-binding protein	K11950	Carbon fixation prokaryotes	4.11e-05	3.26e-05	3.8e-05	3.89e-05	1.05e-05	1.91e-05	0.000174	1.68e-05	0	3.9e-05	4.13e-05	3.46e-05	2.38e-05	3.49e-05	1.74e-05	0	6.11e-06	3.57e-06	0	0	4.67e-06	5.07e-06	0	0	0	0	0	0	0	0	0	0	0	0	0	0	0	0	0	0	0	1.06e-06	0	0
Metabolism	Energy metabolism	00196 Photosynthesis - antenna proteins [PATH:ko00196]	apcC; phycobilisome core linker protein	K02094	Carbon fixation prokaryotes	1.43e-05	7.45e-06	6.65e-06	7.32e-06	4.48e-06	5.99e-06	3.51e-05	9.61e-06	0	7.81e-06	3.76e-06	1.3e-05	2.64e-06	7.75e-06	0	0	0	6.49e-07	3.29e-06	2.87e-06	0	3.38e-06	0	0	0	0	0	0	0	0	0	3.73e-06	8.05e-06	4.12e-05	2.44e-05	2.85e-06	1.08e-05	1.13e-05	0	2.77e-06	0	0	0	0
Metabolism	Carbohydrate metabolism	00020 Citrate cycle (TCA cycle) [PATH:ko00020]	E4.2.1.2AA, fumA; fumarate hydratase subunit alpha [EC:4.2.1.2]	K01677	Carbon fixation prokaryotes	8.56e-06	3.19e-05	4.21e-05	3.14e-05	3.05e-05	3.58e-05	6.59e-05	0.000118	7.44e-05	0.000135	7.89e-05	6.48e-05	7.4e-05	5.42e-05	5.46e-05	6e-05	5.5e-05	9.94e-05	8.45e-05	9.17e-05	4e-05	0.000112	0.000133	9.85e-06	6.75e-05	0	0	0	0	0	0	0	1.24e-07	0	0	2.85e-06	0	2.26e-05	3.19e-05	0	0	5.23e-05	5.16e-05	5.79e-05
Metabolism	Energy metabolism	00196 Photosynthesis - antenna proteins [PATH:ko00196]	apcF; phycobilisome core component	K02097	Carbon fixation prokaryotes	2.11e-05	1.24e-05	6.65e-06	1.46e-05	4.27e-06	5.45e-06	3.29e-05	7.21e-06	0	2.86e-05	3.01e-05	1.73e-05	3.7e-05	0	0	0	9.16e-06	0	2.19e-06	4.3e-06	1.4e-06	3.38e-06	0	1.64e-06	0	0	0	0	0	0	0	5.41e-06	1.15e-05	5.78e-05	4.06e-05	8.56e-06	8.12e-06	2.82e-05	0	3.05e-05	2.61e-05	0	0	0
Metabolism	Energy metabolism	00196 Photosynthesis - antenna proteins [PATH:ko00196]	apcD; allophycocyanin-B	K02095	Carbon fixation prokaryotes	4.05e-05	1.84e-05	7.89e-06	1.42e-05	8.12e-06	1.63e-06	8.18e-05	9.61e-06	0	1.3e-05	1.5e-05	1.3e-05	2.64e-06	3.87e-06	4.96e-06	0	0	1.62e-06	3.29e-06	1.43e-06	0	0	0	0	0	0	0	0	0	7.2e-05	0	6.25e-06	1e-05	5.55e-05	3.44e-05	1.14e-05	0	1.13e-05	0	1.39e-05	2.98e-05	0	0	0
Environmental Information Processing	Membrane transport	02010 ABC transporters [PATH:ko02010]	cmpC; bicarbonate transport system ATP-binding protein [EC:3.6.3.-]	K11952	Carbon fixation prokaryotes	0.000152	6.98e-05	4.44e-05	6.19e-05	2.16e-05	3.87e-05	0.000392	3.36e-05	0	7.29e-05	6.39e-05	6.91e-05	7.66e-05	3.49e-05	9.92e-06	1.38e-05	1.73e-05	6.49e-06	5.48e-06	2.87e-06	1.1e-05	1.18e-05	2.63e-06	0	0	0	0	0	0	0	0	5.59e-07	9.9e-07	4.55e-07	1.08e-06	2.85e-06	0	5.64e-06	6.38e-06	0	3.73e-06	1.43e-05	6.45e-06	1e-05
Metabolism	Energy metabolism	00196 Photosynthesis - antenna proteins [PATH:ko00196]	apcB; allophycocyanin beta subunit	K02093	Carbon fixation prokaryotes	5.93e-05	2.09e-05	1.5e-05	1.32e-05	6.41e-06	1.2e-05	8.23e-05	9.61e-06	7.83e-06	5.2e-06	1.13e-05	1.51e-05	1.58e-05	7.75e-06	0	0	7.13e-06	9.74e-07	1.1e-06	2.87e-06	7.01e-07	5.07e-06	2.63e-06	0	0	0	0	0	0	0	4.38e-05	6.43e-06	1.13e-05	7.49e-05	4.55e-05	1.43e-05	5.41e-06	1.13e-05	1.59e-05	2.22e-05	7.46e-06	1.06e-06	0	0
Metabolism	Metabolism of cofactors and vitamins	00860 Porphyrin and chlorophyll metabolism [PATH:ko00860]	bchX; chlorophyllide reductase iron protein subunit X [EC:1.18.6.1]	K11333	Carbon fixation prokaryotes	0.000174	7.45e-05	4.95e-05	5.98e-05	6.53e-05	7.1e-05	4.45e-05	0	0	0	7.51e-06	1.94e-05	2.91e-05	1.94e-05	4.96e-06	9.23e-06	1.12e-05	8.44e-06	3.29e-06	7.16e-06	8.18e-06	8.45e-06	7.9e-06	0	0	0	0	0	0	0	0	3.79e-05	6.6e-05	9.33e-05	8.44e-05	0.000362	9.47e-05	9.59e-05	0.000191	0.000225	0.00016	3.17e-06	3.87e-06	1.11e-06
Metabolism	Metabolism of cofactors and vitamins	00860 Porphyrin and chlorophyll metabolism [PATH:ko00860]	bchY; chlorophyllide reductase subunit Y	K11334	Carbon fixation prokaryotes	9.24e-05	5.85e-05	4.46e-05	6.15e-05	4.25e-05	5.69e-05	2.43e-05	1.92e-05	1.17e-05	1.3e-05	7.51e-06	3.46e-05	3.43e-05	3.1e-05	2.48e-06	6.92e-06	1.22e-05	2.24e-05	8.77e-06	1.58e-05	1.89e-05	1.52e-05	3.03e-05	1.64e-06	0	0	0	0	0	0	0	4.77e-05	8.28e-05	0.000115	0.00011	0.000588	0.000154	0.000198	0.00021	0.000397	0.000265	3.17e-06	5.16e-06	3.34e-06
Metabolism	Metabolism of cofactors and vitamins	00860 Porphyrin and chlorophyll metabolism [PATH:ko00860]	bchZ; chlorophyllide reductase subunit Z	K11335	Carbon fixation prokaryotes	0.000127	8.76e-05	0.000108	0.000102	8.31e-05	8.96e-05	6.15e-05	2.4e-06	3.13e-05	7.81e-06	0	4.75e-05	3.96e-05	1.94e-05	1.98e-05	4.62e-06	9.16e-06	1.82e-05	1.54e-05	1.29e-05	1.5e-05	1.69e-05	2.63e-05	4.93e-06	0	0	0	0	2.46e-05	0	0	5.33e-05	9.9e-05	0.000133	0.000134	0.00059	0.000114	0.000226	0.000223	0.000344	0.000287	7.93e-06	2.58e-06	3.34e-06
Metabolism	Carbohydrate metabolism	00020 Citrate cycle (TCA cycle) [PATH:ko00020]	ACLY; ATP citrate (pro-S)-lyase [EC:2.3.3.8]	K01648	Carbon fixation prokaryotes	0.000248	0.000248	0.000469	0.000311	0.000535	0.000405	0.000622	0.000175	0.000333	6.77e-05	0.000143	1.51e-05	1.32e-05	2.32e-05	3.97e-05	3.92e-05	4.89e-05	3.38e-05	3.29e-05	6.3e-05	1.73e-05	5.75e-05	2.37e-05	0	0.000742	0.00157917	0.000885	0.000659	0.000467	0.000216	0.000307	2e-05	1.86e-05	1e-05	1.33e-05	2.28e-05	5.41e-06	3.95e-05	2.55e-05	4.44e-05	7.46e-06	5.29e-06	1.29e-05	1.11e-05
Metabolism	Energy metabolism	00196 Photosynthesis - antenna proteins [PATH:ko00196]	apcE; phycobilisome core-membrane linker protein	K02096	Carbon fixation prokaryotes	0.000335	0.000103	0.000102	0.000121	6.41e-05	7.28e-05	0.000564	5.53e-05	4.31e-05	0.000125	0.00012	9.94e-05	8.72e-05	6.97e-05	1.24e-05	6.92e-06	4.48e-05	9.09e-06	8.77e-06	3.44e-05	1.1e-05	2.71e-05	1.19e-05	6.57e-06	0	0	0	0	0	0	0.000132	2.39e-05	5.46e-05	0.000291	0.000185	3.71e-05	3.25e-05	8.46e-05	3.19e-05	0.000144295	0.000116	0	0	0
Metabolism	Carbohydrate metabolism	00620 Pyruvate metabolism [PATH:ko00620]	pta; phosphate acetyltransferase [EC:2.3.1.8]	K13788	Carbon fixation prokaryotes	0.00013	0.000443	0.000246	0.000311	0.0004	0.000455	0.000269	0.000464	0.000474	0.000357	0.000413	0.000354	0.000322	0.000469	0.000285	0.000344	0.00032	0.000435	0.000395	0.000431	0.000459	0.000463	0.000555	0.000535	0	0	0	0.000157	7.37e-05	7.2e-05	4.38e-05	4.94e-06	7.8e-06	8.19e-06	7.51e-06	7.13e-05	5.41e-06	9.03e-05	0.000261	3.61e-05	0	0.000175	0.000163	0.000171
Metabolism	Carbohydrate metabolism	00620 Pyruvate metabolism [PATH:ko00620]	ackA; acetate kinase [EC:2.7.2.1]	K00925	Carbon fixation prokaryotes	9.47e-05	0.000206	0.000218	0.000219	0.000296	0.000346	0.000362	0.00112465	0.000869	0.0010539	0.000988	0.000426	0.000462	0.000589	0.000526	0.000415	0.000606	0.000949	0.000786	0.00097	0.000692	0.000972	0.00111305	0.000855	0.000321	0.000101	0.00210375	0.000439	0.000467	0.000144	0.000351	1.62e-05	2.79e-05	2.86e-05	3.09e-05	0.000234	2.44e-05	0.000316	0.000488	4.99e-05	0.000101	0.000693	0.000614	0.000604
Metabolism	Carbohydrate metabolism	00620 Pyruvate metabolism [PATH:ko00620]	E2.3.1.8, pta; phosphate acetyltransferase [EC:2.3.1.8]	K00625	Carbon fixation prokaryotes	7.36e-05	0.000103	0.000129	0.000108	0.000112	0.000154	0.000199	0.000399	0.000364	0.000336	0.000214	6.7e-05	5.55e-05	8.13e-05	9.42e-05	4.39e-05	0.000152	0.000237	0.000181	0.000298	9.39e-05	0.000298	0.000436	0.000323	0.000169	0	0	9.41e-05	2.46e-05	0.000144	0	0.000298	0.000284	0.00046	0.000511	0.000163	0.000441	0.000237	0.000249	0.000255	0.000377	0.000247	0.000301	0.000234
Environmental Information Processing	Membrane transport	02010 ABC transporters [PATH:ko02010]	cmpD; bicarbonate transport system ATP-binding protein [EC:3.6.3.-]	K11953	Carbon fixation prokaryotes	0.000919	0.000948	0.000853	0.00071	0.0007	0.000737	0.000877	0.000988	0.00108075	0.00127509	0.00102929	0.00126176	0.00125729	0.0013054	0.00104886	0.00115876	0.00160445	0.001348	0.00126903	0.00129361	0.00138894	0.00127482	0.00332862	0.00531855	0	8.4e-05	0	0.000408	0.000295	0.00100792	0.000219	0.000926	0.00110161	0.000817	0.000857	0.000633	0.00158839	0.000779	0.000896	0.00114603	0.0012415	0.00166167	0.00158606	0.00162769
Metabolism	Energy metabolism	00720 Carbon fixation pathways in prokaryotes [PATH:ko00720]	fhs; formate--tetrahydrofolate ligase [EC:6.3.4.3]	K01938	Carbon fixation prokaryotes	0.000655	0.000804	0.000772	0.000722	0.000801	0.000949	0.000798	0.000863	0.000709	0.000939	0.000748	0.000685	0.000639	0.000682	0.000682	0.00066	0.000547	0.00075	0.000664	0.000761	0.000538	0.000737	0.000661	0.000144	6.75e-05	1.68e-05	0	3.14e-05	2.46e-05	7.2e-05	0.000395	0.000988	0.000996	0.00133112	0.00146935	0.00114386	0.00144768	0.00107787	0.000979	0.0014818	0.00148011	0.0006	0.000538	0.000494
Metabolism	Amino acid metabolism	00280 Valine, leucine and isoleucine degradation [PATH:ko00280]	MUT; methylmalonyl-CoA mutase [EC:5.4.99.2]	K01847	Carbon fixation prokaryotes	0.00235368	0.00217191	0.00182563	0.00201176	0.00178471	0.0018575	0.00124989	0.000781	0.000803	0.000958	0.000815	0.000838	0.000808	0.000937	0.000779	0.000743	0.00114226	0.000971	0.00102663	0.00102858	0.00101023	0.000942	0.00054	0.000269	0	0	0	0.000188	0.000147	0.000144	0.000351	0.000539	0.000645	0.000706	0.000772	0.00174574	0.00145309	0.00190744	0.00151429	0.00147347	0.00159941	0.000683	0.000627	0.000789
Cellular Processes	Transport and catabolism	04146 Peroxisome [PATH:ko04146]	IDH1, IDH2, icd; isocitrate dehydrogenase [EC:1.1.1.42]	K00031	Carbon fixation prokaryotes	0.00492642	0.00383788	0.00362932	0.00383227	0.00352841	0.00362854	0.00299585	0.00122077	0.00146057	0.00147286	0.00123966	0.00127905	0.00139992	0.00126279	0.00146544	0.00157656	0.00154133	0.00147011	0.00153227	0.00154001	0.0014074	0.00157069	0.00160306	0.00149425	0.000725	0.00084	0.0011236	0.0012551	0.000418	0.00215983	0.00113985	0.0021905	0.00214279	0.00239938	0.00252937	0.00276123	0.00239205	0.00266928	0.00251213	0.00244746	0.0021661	0.00152055	0.00153444	0.00173783
Environmental Information Processing	Signal transduction	02020 Two-component system [PATH:ko02020]	E2.3.1.9, atoB; acetyl-CoA C-acetyltransferase [EC:2.3.1.9]	K00626	Carbon fixation prokaryotes	0.00425956	0.00454519	0.00397365	0.00441818	0.00381159	0.00408815	0.0028223	0.00316247	0.00274886	0.00320854	0.00305782	0.0034396	0.0036213	0.00341651	0.00333008	0.00344857	0.00388591	0.00371115	0.0041197	0.00399687	0.00391194	0.00375175	0.0039701	0.00479638	0.000641	0.000336	0.000406	0.0012551	0.000614	0.00158387	0.0016221	0.00192885	0.00212199	0.00258934	0.00293439	0.00365978	0.00325254	0.00428327	0.00378732	0.00362125	0.00319509	0.00426093	0.00437361	0.00427226
Metabolism	Energy metabolism	00196 Photosynthesis - antenna proteins [PATH:ko00196]	cpcD; phycocyanin-associated, rod	K02287	Oxygenic photosynthesis	3.99e-06	3.55e-07	1.97e-06	1.67e-06	2.56e-06	3.09e-06	2e-05	4.81e-06	0	7.81e-06	3.76e-06	0	7.92e-06	0	0	4.62e-06	2.04e-06	0	1.1e-06	0	9.35e-07	1.69e-06	0	0	0	0	0	0	0	0	0	0	0	0	0	0	0	0	0	0	0	0	0	0
Metabolism	Energy metabolism	00196 Photosynthesis - antenna proteins [PATH:ko00196]	cpeR; phycoerythrin-associated linker protein	K05381	Oxygenic photosynthesis	2.28e-06	2.13e-06	2.46e-07	8.37e-07	1.49e-06	3.63e-07	2.7e-06	4.81e-06	0	0	0	0	0	0	0	0	0	3.25e-07	0	2.87e-06	0	0	1.32e-06	0	0	0	0	0	0	0	0	2.7e-06	4.7e-06	2.7e-05	2.09e-05	2.85e-06	5.41e-06	1.13e-05	0	2.77e-06	1.86e-05	0	0	0
Metabolism	Energy metabolism	00196 Photosynthesis - antenna proteins [PATH:ko00196]	cpcF; phycocyanobilin lyase beta subunit	K02289	Oxygenic photosynthesis	0	7.09e-07	0	2.09e-07	0	0	0	9.61e-06	1.17e-05	1.56e-05	3.01e-05	8.64e-06	5.28e-06	3.87e-06	0	0	4.07e-06	6.49e-07	0	1.43e-06	4.67e-07	3.38e-06	2.63e-06	0	0	0	0	0	0	0	0	3.08e-06	5.45e-06	4.96e-05	2.91e-05	5.71e-06	2.71e-06	5.64e-06	0	1.66e-05	7.46e-06	0	0	0
Metabolism	Energy metabolism	00196 Photosynthesis - antenna proteins [PATH:ko00196]	cpcE; phycocyanobilin lyase alpha subunit [EC:4.-.-.-]	K02288	Oxygenic photosynthesis	0	0	0	6.28e-07	8.54e-07	3.63e-07	0	9.61e-06	1.57e-05	2.08e-05	1.5e-05	1.94e-05	2.11e-05	3.49e-05	2.48e-06	0	4.07e-06	2.92e-06	0	4.3e-06	3.74e-06	0	2.63e-06	0	0	0	0	0	0	0	0	8.67e-06	1.91e-05	6.5e-05	4.39e-05	5.71e-06	2.71e-06	3.39e-05	0	4.99e-05	2.98e-05	0	0	0
Metabolism	Energy metabolism	00195 Photosynthesis [PATH:ko00195]	petM; cytochrome b6-f complex subunit 7	K02643	Oxygenic photosynthesis	0	0	0	0	0	0	0	2.4e-06	7.83e-06	0	7.51e-06	4.32e-06	5.28e-06	7.75e-06	0	0	0	1.3e-06	0	4.3e-06	0	0	1.32e-06	0	0	0	0	0	0	0	8.77e-05	5.28e-05	4.28e-05	4.84e-05	3.42e-05	2.85e-06	2.71e-06	0	0	2.77e-06	7.46e-06	0	0	0
Metabolism	Energy metabolism	00196 Photosynthesis - antenna proteins [PATH:ko00196]	cpcA; phycocyanin alpha chain	K02284	Oxygenic photosynthesis	2.8e-05	1.42e-05	1.21e-05	1.13e-05	7.05e-06	2.91e-06	3.37e-05	4.81e-06	1.17e-05	2.6e-06	7.51e-06	1.08e-05	2.11e-05	7.75e-06	0	0	2.04e-06	1.62e-06	4.39e-06	2.87e-06	2.34e-06	0	0	0	0	0	0	0	0	0	0	5.22e-06	1.15e-05	6.13e-05	3.95e-05	5.71e-06	5.41e-06	1.13e-05	3.19e-06	8.32e-06	1.49e-05	0	0	0
Metabolism	Energy metabolism	00196 Photosynthesis - antenna proteins [PATH:ko00196]	cpcB; phycocyanin beta chain	K02285	Oxygenic photosynthesis	2.45e-05	7.45e-06	6.16e-06	8.79e-06	5.98e-06	7.08e-06	4.48e-05	4.81e-06	1.96e-05	1.56e-05	3.01e-05	1.94e-05	1.58e-05	0	0	2.31e-06	2.04e-06	3.25e-07	1.1e-06	4.3e-06	2.1e-06	3.38e-06	1.32e-06	0	0	0	0	0	0	0	4.38e-05	6.15e-06	1.1e-05	6.93e-05	3.82e-05	1.14e-05	5.41e-06	1.13e-05	3.19e-06	1.66e-05	1.12e-05	0	0	0
Metabolism	Energy metabolism	00196 Photosynthesis - antenna proteins [PATH:ko00196]	cpeZ; bilin biosynthesis protein	K05386	Oxygenic photosynthesis	0	0	2.46e-07	0	0	0	0	0	0	0	0	0	0	0	0	0	0	1.62e-06	2.19e-06	4.3e-06	1.4e-06	0	3.95e-06	3.28e-06	0	0	0	0	0	7.2e-05	0	7.46e-06	1.26e-05	7.82e-05	4.77e-05	2e-05	2.71e-06	2.26e-05	0	2.77e-05	4.85e-05	0	0	0
Metabolism	Energy metabolism	00195 Photosynthesis [PATH:ko00195]	petN; cytochrome b6-f complex subunit 8	K03689	Oxygenic photosynthesis	5.7e-07	0	0	2.09e-07	0	3.63e-07	1.89e-06	0	0	7.81e-06	3.76e-06	4.32e-06	0	3.87e-06	0	0	0	6.49e-07	0	7.16e-06	7.01e-07	0	2.63e-06	0	0	0	0	0	0	0	8.77e-05	8.5e-05	7.8e-05	4.23e-05	2.95e-05	0	0	1.13e-05	0	5.27e-05	3.73e-06	0	0	0
Metabolism	Energy metabolism	00196 Photosynthesis - antenna proteins [PATH:ko00196]	cpeT; CpeT protein	K05383	Oxygenic photosynthesis	2.28e-06	3.55e-07	2.96e-06	4.19e-07	6.41e-07	1.82e-06	1.62e-06	2.4e-06	0	0	0	0	0	0	0	0	0	3.25e-07	0	2.87e-06	0	1.69e-06	0	0	0	0	0	0	0	0	0	8.67e-06	1.52e-05	8.95e-05	5.3e-05	0	0	3.95e-05	3.19e-06	2.5e-05	3.36e-05	0	0	0
Metabolism	Energy metabolism	00196 Photosynthesis - antenna proteins [PATH:ko00196]	cpeE; phycoerythrin-associated linker protein	K05380	Oxygenic photosynthesis	5.7e-07	0	2.46e-07	0	0	1.82e-07	0	9.61e-06	0	0	0	0	0	0	0	0	1.02e-06	3.25e-07	0	4.3e-06	7.01e-07	1.69e-06	0	0	0	0	0	0	0	0	0	8.95e-06	1.49e-05	0.000105	6.64e-05	1.14e-05	2.71e-06	1.69e-05	0	3.61e-05	2.61e-05	0	0	0
Metabolism	Energy metabolism	00196 Photosynthesis - antenna proteins [PATH:ko00196]	cpcC; phycocyanin-associated rod linker protein	K02286	Oxygenic photosynthesis	2.85e-06	3.55e-06	5.42e-06	6.28e-07	4.91e-06	3.45e-06	4.59e-06	9.61e-06	2.35e-05	3.64e-05	4.51e-05	2.59e-05	2.91e-05	4.26e-05	0	0	1.02e-06	2.6e-06	1.1e-06	5.73e-06	2.57e-06	1.01e-05	2.63e-06	3.28e-06	0	0	0	0	0	7.2e-05	0	7.55e-06	2.04e-05	0.000109	6.11e-05	2.85e-06	1.62e-05	2.82e-05	6.38e-06	4.44e-05	5.22e-05	0	0	0
Metabolism	Energy metabolism	00195 Photosynthesis [PATH:ko00195]	petG; cytochrome b6-f complex subunit 5	K02640	Oxygenic photosynthesis	1.71e-06	3.55e-06	4.93e-07	1.88e-06	5.55e-06	4.18e-06	2.7e-07	7.21e-06	1.96e-05	5.2e-06	2.63e-05	1.51e-05	0	3.87e-06	0	2.31e-06	4.07e-06	4.22e-06	1.1e-06	0	1.4e-06	5.07e-06	3.95e-06	0	0	0	0	0	0	0	0	0.000109	0.000101	5.82e-05	3.75e-05	2.85e-06	1.35e-05	0	0	2.22e-05	1.12e-05	5.29e-07	0	0
Metabolism	Energy metabolism	00196 Photosynthesis - antenna proteins [PATH:ko00196]	cpeY; bilin biosynthesis protein	K05385	Oxygenic photosynthesis	0	0	0	1.26e-06	6.41e-07	3.63e-07	2.7e-07	4.81e-06	0	0	0	0	0	3.87e-06	0	0	2.04e-06	1.95e-06	6.58e-06	2.87e-06	1.87e-06	1.69e-06	2.63e-06	0	0	0	0	0	0	0	0	1.26e-05	2.25e-05	0.000131	8.06e-05	2e-05	0	2.82e-05	0	3.33e-05	1.86e-05	0	0	0
Metabolism	Energy metabolism	00196 Photosynthesis - antenna proteins [PATH:ko00196]	cpeU, mpeU; bilin biosynthesis protein	K05384	Oxygenic photosynthesis	0	0	0	0	0	5.45e-07	0	0	0	0	1.13e-05	0	0	0	0	0	0	3.25e-07	0	2.87e-06	1.4e-06	0	3.95e-06	3.28e-06	0	0	0	0	0	0	0	1.52e-05	2.8e-05	0.000138	7.21e-05	3.71e-05	2.98e-05	5.64e-05	3.19e-06	8.88e-05	4.47e-05	0	0	0
Metabolism	Energy metabolism	00195 Photosynthesis [PATH:ko00195]	psaE; photosystem I subunit IV	K02693	Oxygenic photosynthesis	5.13e-06	4.96e-06	4.44e-06	4.39e-06	2.14e-06	1.09e-06	2.32e-05	4.81e-06	0	1.82e-05	2.25e-05	2.38e-05	2.64e-06	7.75e-06	0	0	5.09e-06	1.62e-06	0	2.87e-06	1.4e-06	1.69e-06	0	3.28e-06	0	0	0	0	0	0.000144	0	0.000135	0.000136	6.74e-05	4.47e-05	2.28e-05	1.62e-05	0	1.59e-05	6.38e-05	1.86e-05	1.06e-06	0	0
Metabolism	Energy metabolism	00195 Photosynthesis [PATH:ko00195]	psbE; photosystem II cytochrome b559 subunit alpha	K02707	Oxygenic photosynthesis	3.76e-05	1.56e-05	1.08e-05	1.38e-05	1.09e-05	8.72e-06	6.42e-05	7.21e-06	1.57e-05	3.38e-05	1.13e-05	2.59e-05	2.64e-05	1.55e-05	0	4.62e-06	8.14e-06	3.25e-06	3.29e-06	8.6e-06	7.01e-07	0	0	0	0	0	0	0	0	0	4.38e-05	0.000108	0.000132	7.64e-05	5.93e-05	1.71e-05	1.08e-05	2.26e-05	3.19e-06	0.00015	4.1e-05	0	0	0
Metabolism	Energy metabolism	00195 Photosynthesis [PATH:ko00195]	psaC; photosystem I subunit VII	K02691	Oxygenic photosynthesis	2.17e-05	2.48e-06	6.9e-06	4.81e-06	8.97e-06	4.36e-06	2.4e-05	1.44e-05	1.17e-05	1.82e-05	4.51e-05	2.38e-05	1.32e-05	7.75e-06	0	4.62e-06	1.43e-05	5.52e-06	4.39e-06	4.3e-06	1.64e-06	1.69e-06	1.32e-06	0	0	0	0	0	0	0	0	0.000115	0.000131	8.97e-05	6.42e-05	5.71e-06	8.12e-06	1.13e-05	2.23e-05	4.16e-05	1.12e-05	0	0	0
Metabolism	Energy metabolism	00195 Photosynthesis [PATH:ko00195]	psbF; photosystem II cytochrome b559 subunit beta	K02708	Oxygenic photosynthesis	1.37e-05	4.96e-06	2.96e-06	4.39e-06	4.7e-06	2.72e-06	2.02e-05	4.81e-06	0	5.2e-06	1.5e-05	6.48e-06	0	0	0	0	3.05e-06	2.6e-06	4.39e-06	0	1.64e-06	0	2.63e-06	0	0	0	0	0	0	0	0	0.000165	0.000179	8.82e-05	6e-05	2.85e-06	2.71e-06	1.13e-05	3.19e-06	2.22e-05	1.49e-05	0	0	0
Metabolism	Energy metabolism	00196 Photosynthesis - antenna proteins [PATH:ko00196]	cpeC, mpeC; phycoerythrin-associated linker protein	K05378	Oxygenic photosynthesis	1.71e-06	7.09e-07	1.48e-06	2.09e-07	8.54e-07	7.27e-07	3.51e-06	0	0	0	0	0	0	0	0	0	0	3.9e-06	2.19e-06	1e-05	9.35e-07	0	2.63e-06	1.64e-06	0	0	0	0	0	0	4.38e-05	1.59e-05	3.83e-05	0.000183	0.000105	2.28e-05	1.35e-05	3.39e-05	2.55e-05	6.1e-05	4.47e-05	0	0	0
Metabolism	Energy metabolism	00195 Photosynthesis [PATH:ko00195]	petJ; cytochrome c6	K08906	Oxygenic photosynthesis	3.42e-06	3.55e-07	2.46e-07	2.72e-06	3.63e-06	0	1.81e-05	0	3.92e-06	3.9e-05	2.63e-05	3.67e-05	3.43e-05	2.71e-05	9.92e-06	2.31e-06	2.04e-06	6.49e-07	4.39e-06	2.87e-06	3.04e-06	0	3.95e-06	0	0	0	0	0	0	7.2e-05	0	0.000186	0.000184	0.000114	7.04e-05	1.14e-05	5.41e-06	1.69e-05	2.55e-05	5.55e-05	2.61e-05	1.06e-06	2.58e-06	0
Metabolism	Energy metabolism	00196 Photosynthesis - antenna proteins [PATH:ko00196]	cpcG; phycobilisome rod-core linker protein	K02290	Oxygenic photosynthesis	2.11e-05	1.91e-05	1.65e-05	2.28e-05	1.13e-05	1.4e-05	0.00012	1.44e-05	0	2.08e-05	3.01e-05	3.24e-05	2.91e-05	2.32e-05	4.96e-06	9.23e-06	1.32e-05	4.87e-06	1.1e-05	1.29e-05	2.8e-06	1.01e-05	2.63e-06	1.64e-06	0	0	0	0	0	0	4.38e-05	1.92e-05	3.44e-05	0.00021	0.000144	2.28e-05	5.41e-06	5.08e-05	3.51e-05	3.88e-05	2.98e-05	0	0	0
Metabolism	Energy metabolism	00196 Photosynthesis - antenna proteins [PATH:ko00196]	cpeA, mpeA; phycoerythrin alpha chain	K05376	Oxygenic photosynthesis	4.56e-06	7.09e-07	1.23e-06	2.09e-07	6.41e-07	1.82e-06	2.7e-06	0	7.83e-06	0	0	0	0	0	0	0	0	4.87e-06	5.48e-06	5.73e-06	1.4e-06	5.07e-06	2.63e-06	6.57e-06	0	0	0	0	0	0	0	1.76e-05	4.54e-05	0.000238	0.000162	2e-05	1.62e-05	0.000113	0	0.000103	7.46e-05	0	0	0
Metabolism	Energy metabolism	00195 Photosynthesis [PATH:ko00195]	psaD; photosystem I subunit II	K02692	Oxygenic photosynthesis	1.77e-05	7.8e-06	1.18e-05	1.74e-05	1.17e-05	5.63e-06	2.27e-05	1.2e-05	1.17e-05	1.56e-05	1.88e-05	1.73e-05	1.85e-05	2.71e-05	2.48e-06	0	2.04e-05	2.92e-06	2.19e-06	5.73e-06	1.64e-06	3.38e-06	1.32e-06	0	0	0	0	0	0	7.2e-05	0	0.000246	0.000267	0.000123	8.51e-05	5.13e-05	1.62e-05	1.13e-05	1.28e-05	5.55e-05	6.71e-05	0	0	0
Metabolism	Energy metabolism	00196 Photosynthesis - antenna proteins [PATH:ko00196]	cpeD, mpeD; phycoerythrin-associated linker protein	K05379	Oxygenic photosynthesis	5.7e-07	0	2.46e-07	0	2.14e-07	0	0	4.81e-06	0	0	0	0	0	0	0	0	0	2.6e-06	2.19e-06	1e-05	1.64e-06	6.76e-06	2.63e-06	0	0	0	0	0	0	7.2e-05	8.77e-05	2.09e-05	4.2e-05	0.000265	0.000166	5.13e-05	2.44e-05	5.64e-05	1.28e-05	8.05e-05	8.57e-05	0	0	0
Metabolism	Energy metabolism	00195 Photosynthesis [PATH:ko00195]	petD; cytochrome b6-f complex subunit 4	K02637	Oxygenic photosynthesis	8.27e-05	4.61e-05	5.69e-05	4.56e-05	5.51e-05	4.29e-05	0.000161	2.4e-05	7.83e-06	2.34e-05	3.38e-05	3.89e-05	2.64e-05	2.71e-05	4.96e-06	0	1.53e-05	2.34e-05	7.68e-06	1.43e-05	6.31e-06	1.01e-05	1.45e-05	0	0	0	0	0	0	0	4.38e-05	0.000201	0.000231	0.000129	8.86e-05	9.13e-05	2.44e-05	2.26e-05	1.28e-05	8.88e-05	6.34e-05	0	1.29e-06	0
Metabolism	Energy metabolism	00195 Photosynthesis [PATH:ko00195]	petE; plastocyanin	K02638	Oxygenic photosynthesis	6.85e-06	1.06e-06	2.96e-06	4.6e-06	2.35e-06	9.08e-07	2.02e-05	2.4e-06	0	1.04e-05	7.51e-06	1.3e-05	1.06e-05	0	2.48e-06	9.23e-06	3.05e-06	2.92e-06	3.29e-06	7.16e-06	3.5e-06	5.07e-06	1.05e-05	1.64e-06	0	0	0	0	0	0.000144	8.77e-05	0.000304	0.000268	0.00014	0.000129	2e-05	5.41e-06	3.95e-05	1.28e-05	3.05e-05	1.12e-05	0	1.29e-06	1.11e-06
Metabolism	Energy metabolism	00196 Photosynthesis - antenna proteins [PATH:ko00196]	cpeS; phycoerythrin-associated linker protein	K05382	Oxygenic photosynthesis	1.14e-06	0	4.93e-07	2.09e-07	0	0	2.16e-06	2.4e-06	7.83e-06	5.2e-06	3.76e-06	2.16e-06	0	1.16e-05	0	0	1.02e-06	1.62e-06	2.19e-06	0	2.57e-06	6.76e-06	0	4.93e-06	0	0	0	0	0	0	4.38e-05	0.000332	0.000294	0.000167	0.000108	8.56e-06	2.71e-06	2.26e-05	9.56e-06	1.39e-05	1.49e-05	0	0	0
Metabolism	Energy metabolism	00195 Photosynthesis [PATH:ko00195]	petC; cytochrome b6-f complex iron-sulfur subunit [EC:1.10.9.1]	K02636	Oxygenic photosynthesis	1.37e-05	1.24e-05	1.58e-05	1.44e-05	1.03e-05	4.72e-06	3.02e-05	4.81e-06	3.92e-06	2.34e-05	2.25e-05	4.97e-05	5.28e-05	2.32e-05	3.72e-05	5.08e-05	1.53e-05	1.07e-05	7.68e-06	1.29e-05	1.61e-05	1.52e-05	7.9e-06	3.28e-06	0	0	0	0	0	7.2e-05	4.38e-05	0.000292	0.000384	0.000162	0.000113	2.28e-05	0	3.95e-05	1.91e-05	6.94e-05	3.36e-05	2.01e-05	2.84e-05	2.56e-05
Metabolism	Energy metabolism	00195 Photosynthesis [PATH:ko00195]	petB; cytochrome b6	K02635	Oxygenic photosynthesis	9.01e-05	4.89e-05	4.93e-05	4.81e-05	5e-05	3.85e-05	0.000146	1.2e-05	3.92e-06	3.38e-05	2.25e-05	4.11e-05	3.7e-05	1.94e-05	2.23e-05	1.38e-05	2.34e-05	2.63e-05	1.21e-05	1.43e-05	8.18e-06	2.03e-05	1.19e-05	1.64e-06	0	0	0	0	0	7.2e-05	0	0.000305	0.000342	0.000187	0.000155	4.28e-05	2.44e-05	4.51e-05	3.51e-05	0.000166	7.46e-05	2.11e-06	7.74e-06	6.68e-06
Metabolism	Energy metabolism	00195 Photosynthesis [PATH:ko00195]	psaF; photosystem I subunit III	K02694	Oxygenic photosynthesis	1.03e-05	5.32e-06	4.93e-06	5.02e-06	8.12e-06	4.9e-06	1.94e-05	1.68e-05	1.57e-05	2.34e-05	3.01e-05	1.73e-05	7.92e-06	7.75e-06	0	0	7.13e-06	2.6e-06	1.1e-06	2.87e-06	4.67e-06	8.45e-06	0	0	0	0	0	0	0	0	0.000395	0.000468	0.000521	0.000206	0.000147	5.71e-05	1.08e-05	5.64e-05	6.38e-06	0.000125	5.22e-05	0	0	0
Metabolism	Energy metabolism	00196 Photosynthesis - antenna proteins [PATH:ko00196]	cpeB, mpeB; phycoerythrin beta chain	K05377	Oxygenic photosynthesis	4.56e-06	3.55e-07	4.93e-07	1.88e-06	6.41e-07	3.63e-07	0	4.81e-06	7.83e-06	0	0	0	0	0	0	0	2.04e-06	1.62e-06	1.1e-06	1.15e-05	2.34e-06	3.38e-06	3.95e-06	0	0	0	0	0	0	0	0	0.000363	0.000405	0.000323	0.0002	1.43e-05	2.16e-05	5.64e-05	3.19e-06	6.1e-05	8.95e-05	0	0	0
Metabolism	Energy metabolism	00195 Photosynthesis [PATH:ko00195]	petA; apocytochrome f	K02634	Oxygenic photosynthesis	6.1e-05	4.75e-05	6.43e-05	5.98e-05	7.35e-05	5.03e-05	0.000215	3.36e-05	3.52e-05	5.46e-05	3.38e-05	6.48e-05	3.17e-05	1.55e-05	1.49e-05	4.62e-06	2.55e-05	1.49e-05	1.32e-05	2.44e-05	8.41e-06	1.35e-05	6.59e-06	3.28e-06	1.69e-05	0	0	0	0	0	0.000132	0.000498	0.000581	0.000276	0.000194	6.28e-05	3.52e-05	3.95e-05	5.42e-05	0.000244	8.95e-05	5.29e-07	0	0
Metabolism	Energy metabolism	00195 Photosynthesis [PATH:ko00195]	petH; ferredoxin--NADP+ reductase [EC:1.18.1.2]	K02641	Oxygenic photosynthesis	0.000103	1.63e-05	1.65e-05	3.95e-05	2.84e-05	1.65e-05	0.000133	1.92e-05	1.96e-05	4.68e-05	3.01e-05	3.02e-05	3.7e-05	1.16e-05	0	2.31e-06	1.53e-05	8.12e-06	5.48e-06	1.15e-05	5.14e-06	1.18e-05	6.59e-06	4.93e-06	0	0	0	0	0	0	0	0.00068	0.000728	0.000347	0.000228	3.42e-05	2.98e-05	7.34e-05	2.55e-05	0.000203	5.22e-05	0	0	0
Metabolism	Energy metabolism	00195 Photosynthesis [PATH:ko00195]	psbC; photosystem II CP43 chlorophyll apoprotein	K02705	Oxygenic photosynthesis	0.000173	8.05e-05	7.15e-05	6.95e-05	6.26e-05	5.01e-05	0.000221	3.36e-05	3.13e-05	2.34e-05	3.38e-05	5.4e-05	2.38e-05	1.16e-05	7.44e-06	2.31e-06	2.24e-05	1.53e-05	1.1e-05	1.86e-05	6.07e-06	3.21e-05	1.05e-05	0	0.000118	0	0	0	0	0	0	0.000695	0.000847	0.000372	0.000264	3.99e-05	3.25e-05	7.34e-05	4.78e-05	0.000339	0.000104	5.29e-07	0	0
Metabolism	Energy metabolism	00195 Photosynthesis [PATH:ko00195]	petF; ferredoxin	K02639	Oxygenic photosynthesis	5.31e-05	1.88e-05	1.53e-05	2.99e-05	1e-05	1.11e-05	6.94e-05	2.88e-05	5.48e-05	5.99e-05	6.01e-05	8.64e-05	9.51e-05	5.42e-05	2.23e-05	2.77e-05	1.93e-05	1.14e-05	1.43e-05	1.86e-05	1.07e-05	2.2e-05	1.19e-05	3.28e-06	0	0	0	0	0	0.000144	0.000132	0.000614	0.000639	0.00046	0.00043	0.000103	0.000108	0.000198	7.33e-05	0.00028	0.000179	6.34e-06	5.16e-06	6.68e-06
Metabolism	Energy metabolism	00195 Photosynthesis [PATH:ko00195]	psbB; photosystem II CP47 chlorophyll apoprotein	K02704	Oxygenic photosynthesis	0.000179	9.93e-05	7.15e-05	9.06e-05	7.97e-05	6.39e-05	0.000255	3.6e-05	3.52e-05	4.94e-05	4.88e-05	7.99e-05	5.81e-05	2.32e-05	9.92e-06	6.92e-06	5.4e-05	1.07e-05	9.87e-06	1.43e-05	7.01e-06	1.01e-05	9.22e-06	1.64e-06	0	0	0	6.28e-05	0	0	0.000307	0.000778	0.00101209	0.000407	0.000284	7.7e-05	5.95e-05	0.000113	4.46e-05	0.000411	0.000153	1.06e-06	2.58e-06	0
Metabolism	Energy metabolism	00195 Photosynthesis [PATH:ko00195]	psaB; photosystem I P700 chlorophyll a apoprotein A2	K02690	Oxygenic photosynthesis	0.000451	0.000245	0.000256	0.000263	0.000261	0.000195	0.000603	7.21e-05	4.7e-05	6.77e-05	0.000101	0.00013	0.000114	8.91e-05	2.23e-05	4.39e-05	5.4e-05	5.03e-05	2.19e-05	4.44e-05	2.43e-05	3.72e-05	3.56e-05	4.93e-06	0	0	4.78e-05	3.14e-05	0	0.000288	0.000789	0.00153972	0.00195944	0.000781	0.000546	0.00014	7.04e-05	0.000147	7.65e-05	0.000716	0.000198	2.64e-06	3.87e-06	1.11e-06
Metabolism	Energy metabolism	00195 Photosynthesis [PATH:ko00195]	psaA; photosystem I P700 chlorophyll a apoprotein A1	K02689	Oxygenic photosynthesis	0.000215	0.000113	0.000103	0.000131	0.000108	9.06e-05	0.00034	5.05e-05	2.74e-05	5.99e-05	8.26e-05	7.35e-05	5.02e-05	5.04e-05	9.92e-06	6.92e-06	3.05e-05	3.31e-05	1.32e-05	3.15e-05	1.64e-05	3.89e-05	1.71e-05	8.21e-06	0	1.68e-05	0	3.14e-05	0	0.000288	0.000351	0.00169293	0.00229582	0.000819	0.000549	7.42e-05	4.06e-05	0.000102	6.38e-05	0.000602	0.000179	5.29e-07	0	0
Environmental Information Processing	Signal transduction	02020 Two-component system [PATH:ko02020]	dcuR; two-component system, CitB family, response regulator DcuR	K07703	Anaerobic fumarate respiration	1.71e-06	2.84e-06	9.37e-06	1.26e-06	4.06e-06	7.08e-06	2.97e-06	7.21e-06	0	0	0	0	0	0	0	0	1.02e-06	2.6e-06	0	8.6e-06	4.67e-07	5.07e-06	1.32e-06	3.28e-06	0	0	0	0	0	0	0	9.32e-08	3.71e-07	0	0	0	0	0	3.19e-06	0	0	0	1.29e-06	0
Environmental Information Processing	Signal transduction	02020 Two-component system [PATH:ko02020]	dcuS; two-component system, CitB family, sensor histidine kinase DcuS [EC:2.7.13.3]	K07701	Anaerobic fumarate respiration	3.99e-06	7.8e-06	1.13e-05	7.11e-06	6.83e-06	1.42e-05	6.75e-06	1.2e-05	1.57e-05	0	0	2.16e-06	2.64e-06	3.87e-06	4.96e-06	2.31e-06	2.04e-06	6.49e-06	4.39e-06	7.16e-06	4.21e-06	5.07e-06	1.32e-05	0	0	0	0	3.14e-05	0	7.2e-05	0	1.03e-06	1.49e-06	3.96e-06	4.7e-06	5.71e-06	0	0	3.19e-06	0	0	2.64e-06	0	6.68e-06
Environmental Information Processing	Signal transduction	02020 Two-component system [PATH:ko02020]	dcuB; anaerobic C4-dicarboxylate transporter DcuB	K07792	Anaerobic fumarate respiration	4.56e-06	9.57e-06	9.12e-06	6.07e-06	1.32e-05	1.58e-05	9.99e-06	6.25e-05	4.31e-05	3.12e-05	1.13e-05	2.16e-06	0	3.87e-06	0	4.62e-06	3.05e-06	1.53e-05	1.1e-05	1.15e-05	3.5e-06	2.87e-05	1.05e-05	4.93e-06	0	0	0	9.41e-05	0	7.2e-05	0	3.73e-07	1.24e-07	0	1.62e-07	0	0	5.64e-06	1.28e-05	0	0	1.06e-05	9.03e-06	1.11e-05
Metabolism	Carbohydrate metabolism	00500 Starch and sucrose metabolism [PATH:ko00500]	E3.2.1.4; endoglucanase [EC:3.2.1.4]	K01179	Cellulose degradation	6.96e-05	0.000127	0.000207	0.000122	0.000244	0.000173	0.000225	0.000771	0.000822	0.000752	0.000838	0.000955	0.000998	0.000713	0.00132162	0.00113567	0.00105165	0.000906	0.000932	0.000788	0.000906	0.000702	0.000502	0.000248	0.00054	0.000622	0.000239	0.000722	0.000197	0.00179986	0.00105217	0.000139	0.000135	0.000117	0.000107	0.000251	0.000127	0.000344	0.000558	0.000228	0.00019	0.00104964	0.000978	0.000965
Metabolism	Carbohydrate metabolism	00520 Amino sugar and nucleotide sugar metabolism [PATH:ko00520]	chiA; bifunctional chitinase/lysozyme [EC:3.2.1.14 3.2.1.17]	K13381	Chitin degradation	0	1.06e-06	9.86e-07	0	0	2.18e-06	2.16e-06	2.4e-06	0	0	0	0	0	0	0	0	1.02e-06	0	0	0	0	1.69e-06	0	0	0	0	0	3.14e-05	0	0	0	9.32e-08	0	0	0	0	0	0	0	0	0	0	0	0
Metabolism	Carbohydrate metabolism	00520 Amino sugar and nucleotide sugar metabolism [PATH:ko00520]	E3.5.1.41; chitin deacetylase [EC:3.5.1.41]	K01452	Chitin degradation	2.17e-05	3.19e-05	2.39e-05	2.89e-05	5.32e-05	4.34e-05	3.05e-05	2.4e-05	3.52e-05	4.16e-05	6.76e-05	3.89e-05	3.43e-05	3.49e-05	5.7e-05	4.15e-05	8.14e-05	5.65e-05	4.17e-05	4.58e-05	5.44e-05	3.55e-05	6.72e-05	0.000186	6.75e-05	0.000134	4.78e-05	6.28e-05	4.92e-05	0	4.38e-05	2.79e-05	3.44e-05	4.02e-05	3.86e-05	7.99e-05	2.71e-05	3.39e-05	5.1e-05	5.27e-05	2.61e-05	4.28e-05	3.36e-05	4.12e-05
Environmental Information Processing	Signal transduction	02020 Two-component system [PATH:ko02020]	citX; holo-ACP synthase [EC:2.7.7.61]	K05964	Citrate fermentation	0	1.06e-06	1.48e-06	6.28e-07	8.54e-07	2e-06	1.89e-06	1.92e-05	2.35e-05	0	0	0	5.28e-06	0	4.96e-06	0	0	6.49e-07	0	2.87e-06	7.01e-07	3.38e-06	3.95e-06	0	0	0	0	0	0	0	4.38e-05	0	0	0	0	0	0	0	0	0	0	0	0	0
Environmental Information Processing	Signal transduction	02020 Two-component system [PATH:ko02020]	citD; citrate lyase subunit gamma [EC:4.1.3.6]	K01646	Citrate fermentation	1.14e-06	0	2.96e-06	2.72e-06	1.92e-06	3.27e-06	3.24e-06	2.4e-06	7.83e-06	0	0	4.32e-06	0	0	0	0	3.05e-06	3.25e-06	2.19e-06	1.43e-06	4.67e-07	0	2.63e-06	0	0	0	0	0	0	0	0	0	0	0	0	0	0	0	0	0	0	0	0	0
Environmental Information Processing	Signal transduction	02020 Two-component system [PATH:ko02020]	citM; Mg2+/citrate complex secondary transporter	K11639	Citrate fermentation	0	0	9.12e-06	4.19e-07	5.98e-06	2e-06	2.16e-06	0	0	0	3.76e-06	0	0	3.87e-06	2.48e-06	0	1.02e-06	3.25e-07	1.1e-06	1.43e-06	1.4e-06	0	0	0	0	0	0	0	0	0	0	0	0	0	0	0	0	0	0	0	0	0	0	0
Environmental Information Processing	Signal transduction	02020 Two-component system [PATH:ko02020]	citT; citrate:succinate antiporter	K11638	Citrate fermentation	1.71e-06	0	2.46e-07	1.05e-06	8.54e-07	1.09e-06	2.7e-06	7.21e-06	7.83e-06	0	3.76e-06	0	0	0	0	0	0	0	1.1e-06	1.43e-06	7.01e-07	0	6.59e-06	0	0	0	0	6.28e-05	0	0	0	9.32e-08	0	6.82e-07	4.32e-07	0	2.71e-06	0	0	0	3.73e-06	2.11e-06	7.74e-06	3.34e-06
Environmental Information Processing	Signal transduction	02020 Two-component system [PATH:ko02020]	citC; [citrate (pro-3S)-lyase] ligase [EC:6.2.1.22]	K01910	Citrate fermentation	2.85e-06	3.9e-06	5.67e-06	5.02e-06	4.48e-06	1.11e-05	7.56e-06	4.57e-05	3.92e-05	3.12e-05	2.63e-05	0	0	0	0	2.31e-06	3.05e-06	1.07e-05	1.21e-05	1.15e-05	2.1e-06	1.69e-05	2.11e-05	1.64e-06	0	0	0	9.41e-05	0	0	0	9.32e-08	0	4.55e-08	5.4e-08	0	0	0	9.56e-06	0	0	0	0	0
Environmental Information Processing	Signal transduction	02020 Two-component system [PATH:ko02020]	citS; two-component system, CitB family, sensor histidine kinase CitS [EC:2.7.13.3]	K11637	Citrate fermentation	0	1.77e-06	7.89e-06	2.72e-06	6.41e-07	5.45e-07	6.75e-06	2.64e-05	5.48e-05	4.16e-05	3.01e-05	2.16e-06	2.64e-06	0	1.49e-05	3.23e-05	1.12e-05	2.47e-05	2.52e-05	4.44e-05	1.21e-05	4.4e-05	2.11e-05	8.21e-06	0	0	0	0	0	0	0	2.8e-06	6.44e-06	8.28e-06	1.19e-05	2.85e-06	0	0	0	0	0	1.06e-06	0	0
Environmental Information Processing	Signal transduction	02020 Two-component system [PATH:ko02020]	citG; triphosphoribosyl-dephospho-CoA synthase [EC:2.7.8.25]	K05966	Citrate fermentation	1.14e-06	0	5.18e-06	4.81e-06	3.84e-06	8.36e-06	7.02e-06	4.57e-05	1.96e-05	3.9e-05	4.51e-05	6.48e-05	6.34e-05	6.59e-05	4.71e-05	5.31e-05	3.16e-05	4.03e-05	2.3e-05	2.44e-05	3.01e-05	3.55e-05	3.29e-05	3.28e-06	0	0	0	0	0	0	0	0	2.48e-07	2.73e-07	2.16e-07	0	2.71e-06	5.64e-06	0	0	0	3.17e-05	2.84e-05	3.12e-05
Environmental Information Processing	Signal transduction	02020 Two-component system [PATH:ko02020]	citF; citrate lyase subunit alpha / citrate CoA-transferase [EC:4.1.3.6 2.8.3.10]	K01643	Citrate fermentation	1.37e-05	2.06e-05	1.97e-05	1.99e-05	2.03e-05	2.58e-05	3.7e-05	9.13e-05	9.4e-05	7.03e-05	4.51e-05	3.89e-05	2.64e-05	7.75e-06	2.48e-05	2.31e-05	1.63e-05	4.06e-05	4.61e-05	4.3e-05	1.89e-05	5.75e-05	4.87e-05	4.93e-06	0	0	0	6.28e-05	0	0	0	4.66e-07	0	4.55e-08	3.24e-07	8.56e-06	0	0	5.42e-05	0	0	6.34e-06	2.58e-06	1e-05
Environmental Information Processing	Signal transduction	02020 Two-component system [PATH:ko02020]	citE; citrate lyase subunit beta / citryl-CoA lyase [EC:4.1.3.6 4.1.3.34]	K01644	Citrate fermentation	0.000373	0.000525	0.000347	0.000378	0.000315	0.000319	0.000277	0.000548	0.000552	0.00071	0.000567	0.00084	0.00074	0.000697	0.000684366	0.000789	0.000745	0.000748	0.000835	0.000609	0.000878	0.000649	0.000556	0.00058	0	0	0	3.14e-05	0.000123	0.000144	4.38e-05	0.000169	0.000187	0.000226	0.000224	0.000211	0.000225	0.000401	0.000261	0.000283	0.000309	0.000635	0.0006	0.000587
Metabolism	Carbohydrate metabolism	00630 Glyoxylate and dicarboxylate metabolism [PATH:ko00630]	E1.2.1.2B2; formate dehydrogenase, beta subunit [EC:1.2.1.2]	NA	Formate degradation	4.56e-06	3.55e-06	9.86e-07	2.3e-06	2.56e-06	3.81e-06	6.21e-06	1.92e-05	1.17e-05	1.04e-05	7.51e-06	0	0	0	0	2.31e-06	4.07e-06	1.17e-05	8.77e-06	2.87e-06	2.34e-07	1.69e-05	1.19e-05	0	0	0	0	0	0	0	0	0	0	0	0	0	0	0	0	0	0	0	0	0
Metabolism	Carbohydrate metabolism	00630 Glyoxylate and dicarboxylate metabolism [PATH:ko00630]	E1.2.1.2D, fdsD; formate dehydrogenase, delta subunit [EC:1.2.1.2]	NA	Formate degradation	1.14e-06	0	1.23e-06	1.67e-06	1.92e-06	2.72e-06	2.7e-07	4.81e-06	1.96e-05	2.6e-06	1.13e-05	6.48e-06	5.28e-06	0	7.44e-06	0	1.02e-05	4.87e-06	9.87e-06	5.73e-06	1.03e-05	5.07e-06	1.32e-05	3.45e-05	0	0	0	0	0	0	0	9.32e-08	2.48e-07	3.18e-07	3.78e-07	0	0	0	0	0	7.46e-06	6.34e-06	2.58e-06	5.56e-06
Metabolism	Carbohydrate metabolism	00630 Glyoxylate and dicarboxylate metabolism [PATH:ko00630]	E1.2.1.2NG, fdnI; formate dehydrogenase-N, gamma subunit [EC:1.2.1.2]	NA	Formate degradation	1.6e-05	9.57e-06	8.38e-06	0	3.84e-06	3.09e-06	2.16e-06	4.81e-06	7.83e-06	7.81e-06	1.5e-05	1.08e-05	1.58e-05	1.55e-05	2.48e-06	9.23e-06	6.11e-06	6.49e-06	2.19e-06	2.87e-06	3.27e-06	3.38e-06	3.95e-06	4.93e-05	0	1.68e-05	0	0	2.46e-05	0	0	2.89e-05	3.03e-05	2.19e-05	2.03e-05	2.85e-06	2.71e-05	2.26e-05	3.19e-06	1.66e-05	1.49e-05	1.27e-05	2.06e-05	1.45e-05
Metabolism	Carbohydrate metabolism	00630 Glyoxylate and dicarboxylate metabolism [PATH:ko00630]	E1.2.1.2G; formate dehydrogenase, gamma subunit	NA	Formate degradation	7.13e-05	6.31e-05	6.51e-05	5.27e-05	4.98e-05	3.98e-05	3.72e-05	6.01e-05	9.79e-05	6.25e-05	6.01e-05	5.83e-05	3.43e-05	3.1e-05	5.7e-05	4.85e-05	0.000147	0.000108	0.000117	8.02e-05	0.000111	0.000108	0.000186	0.00035	0	0	0	0	0	0	0	2.95e-05	4.17e-05	4.7e-05	4.66e-05	0.000154	0.000157	0.000107	9.56e-05	0.000133	0.000145	0.000115	9.94e-05	0.00011
Metabolism	Carbohydrate metabolism	00630 Glyoxylate and dicarboxylate metabolism [PATH:ko00630]	FDH; formate dehydrogenase [EC:1.2.1.2]	K00122	Formate degradation	0.000163	0.000213	0.00026	0.000281	0.000275	0.000259	0.000272	0.000142	0.000184	0.000104	0.000188	0.000127	0.000177	0.000159	0.000119	0.000125	0.000158	0.000134	0.000149	0.000119	0.00013	0.000122	0.000281	0.000521	0.000287	0.000756	0.0018886	0.000408	9.83e-05	0.000216	4.38e-05	0.000383	0.000412	0.00032	0.000345	0.00024	0.000636	0.000474	0.000303	0.00035	0.000589	0.000437	0.000483	0.000418
Metabolism	Carbohydrate metabolism	00630 Glyoxylate and dicarboxylate metabolism [PATH:ko00630]	E1.2.1.2B1; formate dehydrogenase, beta subunit	NA	Formate degradation	0.00126925	0.00101753	0.000823	0.000931	0.000737	0.000801	0.000508	0.000252	0.000286	0.000437	0.000364	0.00067	0.000663	0.000542	0.000426	0.000531	0.000461	0.000505	0.00062	0.000503	0.000613	0.00058	0.000555	0.000489	0	5.04e-05	0	0	0	0.000504	0.000263	3.09e-05	5.82e-05	6.18e-05	5.61e-05	0.000148	0.00013	0.000203	0.000169	0.000247	0.000153	0.000425	0.000422	0.000365
Metabolism	Carbohydrate metabolism	00630 Glyoxylate and dicarboxylate metabolism [PATH:ko00630]	E1.2.1.2A; formate dehydrogenase, alpha subunit [EC:1.2.1.2]	NA	Formate degradation	0.00598575	0.00527554	0.0042847	0.00485531	0.00425728	0.00447364	0.00312	0.00183596	0.00169944	0.00214423	0.00219757	0.00265748	0.00258325	0.00255657	0.00234817	0.00269607	0.00290043	0.00284571	0.0031172	0.00307716	0.00299423	0.00300951	0.00300195	0.00345812	0	0	2.39e-05	0.000282	0.000221	0.00165587	0.000789	0.00135882	0.00146027	0.00219542	0.0024464	0.00195112	0.00201593	0.0023194	0.00192235	0.0027527	0.00175599	0.00322239	0.0034625	0.00296722
Metabolism	Carbohydrate metabolism	00500 Starch and sucrose metabolism [PATH:ko00500]	xynB; xylan 1,4-beta-xylosidase [EC:3.2.1.37]	K01198	Hemicellulose degradation	9.01e-05	0.000157	0.000224	0.000179	0.000161	0.000141	0.000158	0.000356	0.000431	0.000281	0.000308	0.000207	0.00019	0.000136	0.000456	0.000323	0.00037	0.000265	0.00027	0.000268	0.00024	0.000208	0.000307	0.00036	0.000219	0.000101	0	0.000157	0.000172	0.000144	8.77e-05	1.06e-05	1.13e-05	9.32e-06	1.19e-05	7.7e-05	5.95e-05	0.000147	0.000137	9.99e-05	6.34e-05	0.000364	0.000444	0.000432
Cellular Processes	Transport and catabolism	04142 Lysosome [PATH:ko04142]	GLB1, ELNR1; beta-galactosidase [EC:3.2.1.23]	K12309	Lactose degradation	5.7e-07	3.55e-07	4.93e-07	2.09e-07	8.54e-07	0	1.35e-06	1.92e-05	1.57e-05	1.04e-05	1.5e-05	0	0	0	7.44e-06	2.31e-06	2.04e-06	4.22e-06	5.48e-06	1.29e-05	6.07e-06	1.86e-05	6.59e-06	0	0	0	0	0	0	0	0.000351	1.77e-06	8.67e-07	3.18e-07	6.48e-07	0	2.71e-06	1.13e-05	0	8.32e-06	2.24e-05	0	1.29e-06	2.23e-06
Metabolism	Carbohydrate metabolism	00052 Galactose metabolism [PATH:ko00052]	bgaB, lacA; beta-galactosidase [EC:3.2.1.23]	K12308	Lactose degradation	9.58e-05	0.00021	0.000289	0.000226	0.000243	0.000238	0.000302	0.000634	0.000493	0.000606	0.000556	0.000577	0.000631	0.000705	0.00064	0.000702	0.000572	0.000599	0.000563	0.000564	0.000634	0.000456	0.000323	0.00042	1.69e-05	0	0	3.14e-05	2.46e-05	7.2e-05	0.000132	4.57e-05	4.11e-05	8.45e-05	7.63e-05	0.000439	0.000141	0.000277	0.000252	0.000319	0.000254	0.000407	0.000386	0.000444
Metabolism	Carbohydrate metabolism	00052 Galactose metabolism [PATH:ko00052]	lacZ; beta-galactosidase [EC:3.2.1.23]	K01190	Lactose degradation	0.000108	0.000192	0.0002	0.000233	0.000255	0.000276	0.000533	0.00181674	0.00162112	0.00143643	0.00132606	0.000564	0.000486	0.000573	0.00112821	0.000866	0.000866	0.000935	0.000774	0.000935	0.000615	0.000834	0.000721	0.00012	0.000523	0.000235	4.78e-05	0.000377	0.000344	0.000432	0.00057	0.000125	0.000141	0.000171	0.000205	0.000377	0.000308	0.000638	0.00133577	0.000513	0.000477	0.000787	0.000893	0.00082
Metabolism	Carbohydrate metabolism	00010 Glycolysis / Gluconeogenesis [PATH:ko00010]	mdh2, mxaI; methanol dehydrogenase (cytochrome c) subunit 2 [EC:1.1.2.7]	K14029	Methane oxidation	1.71e-06	3.55e-06	8.38e-06	8.37e-07	5.13e-06	5.09e-06	2.43e-06	0	0	0	0	0	0	0	0	0	0	9.74e-07	2.19e-06	4.3e-06	7.01e-07	0	0	0	0	0	0	0	0	0	0	0	0	0	1.62e-07	0	0	0	0	0	0	1.06e-06	0	0
Metabolism	Carbohydrate metabolism	00010 Glycolysis / Gluconeogenesis [PATH:ko00010]	mdh1, mxaF; methanol dehydrogenase (cytochrome c) subunit 1 [EC:1.1.2.7]	K14028	Methane oxidation	1.54e-05	2.48e-05	3.08e-05	2.2e-05	3.27e-05	2.69e-05	2.83e-05	1.92e-05	1.17e-05	7.81e-06	7.51e-06	0	0	0	0	0	8.14e-06	8.44e-06	0	8.6e-06	3.97e-06	0	2.63e-06	4.93e-06	0	0	0	0	0	0	0	1.86e-07	2.48e-07	2.73e-07	4.86e-07	0	0	0	0	0	3.73e-06	4.23e-06	1.03e-05	1.11e-05
Metabolism	Energy metabolism	00680 Methane metabolism [PATH:ko00680]	mtrD; tetrahydromethanopterin S-methyltransferase subunit D [EC:2.1.1.86]	K00580	Methanogenesis	0	3.55e-07	9.86e-07	1.67e-06	4.27e-07	1.45e-06	1.08e-06	2.4e-06	0	1.82e-05	7.51e-06	0	0	0	0	0	4.07e-06	4.87e-06	5.48e-06	1.43e-06	4.67e-07	3.38e-06	0	0	0	0	0	0	0	0	0	0	0	0	0	0	0	0	0	0	0	0	0	0
Metabolism	Energy metabolism	00680 Methane metabolism [PATH:ko00680]	hmd; 5,10-methenyltetrahydromethanopterin hydrogenase [EC:1.12.98.2]	K13942	Methanogenesis	0	1.42e-06	1.73e-06	4.19e-07	0	1.09e-06	2.7e-06	9.61e-06	7.83e-06	5.2e-06	0	0	0	0	0	0	0	8.12e-06	3.29e-06	0	0	1.01e-05	2.63e-06	0	0	0	0	0	0	0	0	0	0	0	0	0	0	0	0	0	0	0	0	0
Metabolism	Energy metabolism	00680 Methane metabolism [PATH:ko00680]	mttC; trimethylamine corrinoid protein	K14084	Methanogenesis	5.7e-07	0	4.93e-07	4.19e-07	0	0	8.1e-07	7.21e-06	7.83e-06	2.6e-06	0	2.16e-06	2.64e-06	0	0	0	2.04e-06	1.95e-06	1.1e-06	2.87e-06	1.4e-06	6.76e-06	1.32e-06	0	0	0	0	0	0	0	0	3.73e-07	4.95e-07	4.09e-07	5.94e-07	0	0	5.64e-06	9.56e-06	0	0	1.59e-06	0	1.11e-06
Metabolism	Energy metabolism	00680 Methane metabolism [PATH:ko00680]	mtrC; tetrahydromethanopterin S-methyltransferase subunit C [EC:2.1.1.86]	K00579	Methanogenesis	0	7.09e-07	3.45e-06	0	4.27e-07	1.82e-07	2.97e-06	1.2e-05	1.96e-05	2.08e-05	1.5e-05	0	0	0	0	0	0	3.9e-06	3.29e-06	0	0	1.35e-05	9.22e-06	3.28e-06	0	0	0	0	0	0	0	0	0	0	0	0	0	0	0	0	0	0	0	0
Metabolism	Energy metabolism	00680 Methane metabolism [PATH:ko00680]	mcrC; methyl-coenzyme M reductase subunit C	K03421	Methanogenesis	1.14e-06	2.13e-06	2.71e-06	2.93e-06	1.07e-06	5.45e-07	2.97e-06	1.2e-05	7.83e-06	2.08e-05	7.51e-06	0	0	0	0	0	5.09e-06	6.17e-06	0	4.3e-06	2.34e-06	3.38e-06	2.63e-06	0	0	0	0	0	0	0	0	0	0	0	0	0	0	0	0	0	0	0	0	0
Metabolism	Energy metabolism	00680 Methane metabolism [PATH:ko00680]	mtrE; tetrahydromethanopterin S-methyltransferase subunit E [EC:2.1.1.86]	K00581	Methanogenesis	0	2.13e-06	4.44e-06	2.93e-06	8.54e-07	1.27e-06	6.75e-06	9.61e-06	7.83e-06	3.38e-05	0	0	0	0	0	0	3.05e-06	7.14e-06	1.1e-06	5.73e-06	0	3.38e-06	6.59e-06	0	0	0	0	0	0	0	0	0	0	0	0	0	0	0	0	0	0	0	0	0
Metabolism	Energy metabolism	00680 Methane metabolism [PATH:ko00680]	mcrG; methyl-coenzyme M reductase gamma subunit [EC:2.8.4.1]	K00402	Methanogenesis	1.71e-06	1.06e-06	2.22e-06	1.46e-06	2.56e-06	5.45e-06	2.7e-06	7.21e-06	1.17e-05	1.3e-05	1.13e-05	0	0	0	0	0	5.09e-06	8.12e-06	2.19e-06	2.87e-06	9.35e-07	6.76e-06	1.45e-05	0	0	0	0	0	0	0	0	0	0	0	0	0	0	0	0	0	0	0	0	0
Metabolism	Energy metabolism	00680 Methane metabolism [PATH:ko00680]	mcrB; methyl-coenzyme M reductase beta subunit [EC:2.8.4.1]	K00401	Methanogenesis	1.14e-06	1.42e-06	3.7e-06	4.81e-06	4.7e-06	6.18e-06	8.91e-06	7.21e-06	1.17e-05	2.6e-05	7.51e-06	0	0	0	0	0	4.07e-06	8.77e-06	4.39e-06	7.16e-06	4.67e-07	1.69e-05	7.9e-06	0	0	0	0	0	0	0	0	0	0	0	0	0	0	0	0	0	0	0	0	0
Metabolism	Energy metabolism	00680 Methane metabolism [PATH:ko00680]	mtrH; tetrahydromethanopterin S-methyltransferase subunit H [EC:2.1.1.86]	K00584	Methanogenesis	6.85e-06	3.9e-06	6.16e-06	5.02e-06	1.92e-06	4.9e-06	1.08e-05	1.68e-05	1.57e-05	1.82e-05	1.88e-05	0	0	0	0	0	4.07e-06	1.14e-05	1.54e-05	2.87e-06	0	1.69e-05	2.37e-05	1.64e-06	0	0	0	0	0	0	0	0	0	0	0	0	0	0	6.38e-06	0	0	0	0	0
Metabolism	Energy metabolism	00680 Methane metabolism [PATH:ko00680]	cdhD; acetyl-CoA decarbonylase/synthase complex subunit delta [EC:2.1.1.245]	K00194	Methanogenesis	1.71e-06	3.55e-06	4.44e-06	1.05e-06	5.98e-06	5.45e-07	2.16e-06	2.64e-05	7.83e-06	2.08e-05	1.88e-05	0	5.28e-06	0	0	0	2.04e-06	2.08e-05	1.32e-05	1.29e-05	4.44e-06	2.54e-05	2.24e-05	3.28e-06	0	0	0	0	0	0	0	3.73e-07	1.24e-07	7.28e-07	8.1e-07	0	0	5.64e-06	2.55e-05	2.77e-06	0	5.29e-07	0	0
Metabolism	Energy metabolism	00680 Methane metabolism [PATH:ko00680]	cdhD; acetyl-CoA decarbonylase/synthase complex subunit delta [EC:2.1.1.245]	K00197	Methanogenesis	1.71e-06	3.55e-06	4.44e-06	1.05e-06	5.98e-06	5.45e-07	2.16e-06	2.64e-05	7.83e-06	2.08e-05	1.88e-05	0	5.28e-06	0	0	0	2.04e-06	2.08e-05	1.32e-05	1.29e-05	4.44e-06	2.54e-05	2.24e-05	3.28e-06	0	0	0	0	0	0	0	3.73e-07	1.24e-07	7.28e-07	8.1e-07	0	0	5.64e-06	2.55e-05	2.77e-06	0	5.29e-07	0	0
Metabolism	Energy metabolism	00680 Methane metabolism [PATH:ko00680]	mcrA; methyl-coenzyme M reductase alpha subunit [EC:2.8.4.1]	K00399	Methanogenesis	4.56e-06	6.03e-06	8.38e-06	9e-06	5.13e-06	1.13e-05	9.99e-06	1.44e-05	0	1.82e-05	1.13e-05	0	0	0	0	0	6.11e-06	1.53e-05	5.48e-06	0	0	8.45e-06	7.9e-06	0	0	0	0	0	0	0	0	0	0	0	0	0	0	0	0	0	0	0	0	0
Metabolism	Energy metabolism	00680 Methane metabolism [PATH:ko00680]	comD; sulfopyruvate decarboxylase subunit alpha [EC:4.1.1.79]	K06034	Methanogenesis	5.7e-07	1.77e-06	1.73e-06	2.09e-07	0	3.63e-07	2.7e-07	0	3.92e-06	2.6e-06	3.76e-06	4.32e-06	2.64e-06	7.75e-06	9.92e-06	2.31e-06	7.13e-06	3.25e-06	4.39e-06	1.43e-06	3.04e-06	0	2.63e-06	0	0	0	0	0	0	0	8.77e-05	1.34e-05	1.99e-05	2.49e-05	2.1e-05	3.14e-05	4.87e-05	5.64e-05	4.78e-05	8.05e-05	8.57e-05	1.06e-06	7.74e-06	4.45e-06
Metabolism	Energy metabolism	00680 Methane metabolism [PATH:ko00680]	mch; methenyltetrahydromethanopterin cyclohydrolase [EC:3.5.4.27]	K01499	Methanogenesis	1.71e-06	7.8e-06	4.93e-06	1.53e-05	1.56e-05	2.03e-05	1.57e-05	1.2e-05	7.83e-06	3.9e-05	3.38e-05	5.62e-05	4.49e-05	3.87e-05	3.47e-05	3.46e-05	6.01e-05	5.2e-05	6.03e-05	2.29e-05	5.63e-05	3.21e-05	5.01e-05	1.15e-05	0	0	0	0	0	0	0	5.79e-05	4.25e-05	4.94e-05	5.03e-05	5.71e-06	3.25e-05	1.13e-05	9.56e-06	3.05e-05	2.61e-05	4.44e-05	4e-05	3.34e-05
Metabolism	Energy metabolism	00680 Methane metabolism [PATH:ko00680]	E4.4.1.19, comA; phosphosulfolactate synthase [EC:4.4.1.19]	K08097	Methanogenesis	1.03e-05	1.38e-05	3.8e-05	3.54e-05	2.71e-05	3.25e-05	1.86e-05	4.33e-05	0.00011	0.000101	9.39e-05	0.000145	0.000143	5.04e-05	0.00026	0.000178	9.26e-05	5.94e-05	4.72e-05	6.45e-05	6.64e-05	4.4e-05	3.56e-05	6.57e-06	0	0	0	0	0	0	0	2.91e-05	2.39e-05	2.07e-05	2.81e-05	7.42e-05	5.41e-05	5.64e-05	6.38e-05	2.22e-05	8.95e-05	0.000104	9.81e-05	0.00013
Metabolism	Carbohydrate metabolism	00620 Pyruvate metabolism [PATH:ko00620]	pta; phosphate acetyltransferase [EC:2.3.1.8]	K13788	Methanogenesis	0.00013	0.000443	0.000246	0.000311	0.0004	0.000455	0.000269	0.000464	0.000474	0.000357	0.000413	0.000354	0.000322	0.000469	0.000285	0.000344	0.00032	0.000435	0.000395	0.000431	0.000459	0.000463	0.000555	0.000535	0	0	0	0.000157	7.37e-05	7.2e-05	4.38e-05	4.94e-06	7.8e-06	8.19e-06	7.51e-06	7.13e-05	5.41e-06	9.03e-05	0.000261	3.61e-05	0	0.000175	0.000163	0.000171
Metabolism	Energy metabolism	00680 Methane metabolism [PATH:ko00680]	E3.1.3.71, comB; 2-phosphosulfolactate phosphatase [EC:3.1.3.71]	K05979	Methanogenesis	1.25e-05	7.45e-06	4.44e-06	8.58e-06	5.77e-06	3.45e-06	2.51e-05	4.81e-05	7.83e-05	0.000154	0.00015	0.000246	0.000177	0.000178	0.00025	0.000226	0.000105	9.35e-05	8.66e-05	5.73e-05	8.48e-05	6.42e-05	3.16e-05	1.64e-05	0	0	0	0	0	0.000144	0	0.000743	0.000779	0.000259	0.000174	7.13e-05	1.08e-05	6.21e-05	7.01e-05	4.44e-05	3.73e-05	0.000104	7.87e-05	0.000108
Metabolism	Carbohydrate metabolism	00620 Pyruvate metabolism [PATH:ko00620]	ackA; acetate kinase [EC:2.7.2.1]	K00925	Methanogenesis	9.47e-05	0.000206	0.000218	0.000219	0.000296	0.000346	0.000362	0.00112465	0.000869	0.0010539	0.000988	0.000426	0.000462	0.000589	0.000526	0.000415	0.000606	0.000949	0.000786	0.00097	0.000692	0.000972	0.00111305	0.000855	0.000321	0.000101	0.00210375	0.000439	0.000467	0.000144	0.000351	1.62e-05	2.79e-05	2.86e-05	3.09e-05	0.000234	2.44e-05	0.000316	0.000488	4.99e-05	0.000101	0.000693	0.000614	0.000604
Metabolism	Carbohydrate metabolism	00620 Pyruvate metabolism [PATH:ko00620]	E2.3.1.8, pta; phosphate acetyltransferase [EC:2.3.1.8]	K00625	Methanogenesis	7.36e-05	0.000103	0.000129	0.000108	0.000112	0.000154	0.000199	0.000399	0.000364	0.000336	0.000214	6.7e-05	5.55e-05	8.13e-05	9.42e-05	4.39e-05	0.000152	0.000237	0.000181	0.000298	9.39e-05	0.000298	0.000436	0.000323	0.000169	0	0	9.41e-05	2.46e-05	0.000144	0	0.000298	0.000284	0.00046	0.000511	0.000163	0.000441	0.000237	0.000249	0.000255	0.000377	0.000247	0.000301	0.000234
Metabolism	Energy metabolism	00680 Methane metabolism [PATH:ko00680]	mttB; trimethylamine---corrinoid protein Co-methyltransferase [EC:2.1.1.250]	K14083	Methanogenesis	0.00011	9.25e-05	0.00013	7.53e-05	0.000116	0.000118	6.4e-05	0.000108	9.01e-05	0.00013	0.00012	0.000145	9.51e-05	0.00012	0.000131	0.000138	0.000193	0.000198	0.000143	0.000146	0.000221	0.000127	6.45e-05	3.12e-05	0	0	0	0	2.46e-05	0.000288	0.000351	0.000296	0.000529	0.00065	0.00068	0.00177997	0.0017751	0.00170428	0.00134852	0.00207008	0.00159195	0.000108	0.000151	0.000142
Metabolism	Carbohydrate metabolism	00650 Butanoate metabolism [PATH:ko00650]	AACS, acsA; acetoacetyl-CoA synthetase [EC:6.2.1.16]	K01907	Methanogenesis	0.000391	0.000321	0.000458	0.000326	0.000437	0.00033	0.000355	0.000594	0.00085	0.000723	0.000755	0.000918	0.000821	0.00101488	0.000821	0.000757	0.000664	0.000736	0.000763	0.000668	0.000917	0.000812	0.000843	0.000765	0.00158596	0.00198236	0.000335	0.00313775	0.0010323	0	8.77e-05	0.00088	0.000827	0.00120096	0.00126485	0.000753	0.00142874	0.000909	0.000787	0.000921	0.00138317	0.000993	0.000999	0.000911
Metabolism	Carbohydrate metabolism	00040 Pentose and glucuronate interconversions [PATH:ko00040]	E3.2.1.15; polygalacturonase [EC:3.2.1.15]	K01184	Pectin degradation	8.56e-06	1.13e-05	3.92e-05	2.47e-05	2.65e-05	1.54e-05	3.24e-05	0.000101	0.000114	3.38e-05	6.76e-05	0	2.64e-06	1.55e-05	4.46e-05	1.85e-05	1.32e-05	9.74e-06	5.48e-06	1.29e-05	4.67e-06	5.07e-06	7.9e-06	0	0.000152	0.000168	0.000359	0.000157	0.000147	0	4.38e-05	1.86e-07	4.95e-07	0	2.16e-07	0	0	0	0	0	0	8.98e-06	7.74e-06	2e-05
Metabolism	Carbohydrate metabolism	00040 Pentose and glucuronate interconversions [PATH:ko00040]	E3.2.1.67; galacturan 1,4-alpha-galacturonidase [EC:3.2.1.67]	K01213	Pectin degradation	0	7.09e-07	2.96e-05	2.11e-05	3.59e-05	5.74e-05	6.48e-05	7.93e-05	8.61e-05	4.16e-05	4.88e-05	4.32e-06	0	1.55e-05	1.74e-05	2.31e-06	9.16e-06	1.62e-05	3.29e-06	8.6e-06	5.84e-06	1.18e-05	3.95e-06	1.64e-06	1.69e-05	1.68e-05	0	6.28e-05	0.000197	0	0	9.32e-08	0	1.82e-07	1.08e-07	0	0	0	0	0	0	1.06e-06	1.29e-06	3.34e-06
Metabolism	Carbohydrate metabolism	00040 Pentose and glucuronate interconversions [PATH:ko00040]	E3.1.1.11; pectinesterase [EC:3.1.1.11]	K01051	Pectin degradation	2.17e-05	1.35e-05	3.2e-05	2.72e-06	1.73e-05	1.54e-05	2.16e-05	0.000147	0.000219	0.000182	0.000199	0.000121	0.000122	0.000139	0.000449	0.000397	0.000241	0.000163	0.000144	0.000136	0.000148	9.47e-05	3.29e-05	2.13e-05	0.000135	0	0	6.28e-05	4.92e-05	0	0	0	4.95e-07	8.19e-07	3.78e-07	5.71e-06	0	5.64e-06	3.19e-05	2.77e-06	7.46e-06	0.000124	0.000147	0.000161
Environmental Information Processing	Signal transduction	02020 Two-component system [PATH:ko02020]	torR; two-component system, OmpR family, torCAD operon response regulator TorR	K07772	TMAO respiration	5.7e-07	7.09e-07	7.39e-07	4.19e-07	1.28e-06	1.82e-07	2.7e-07	4.81e-06	0	0	0	0	0	0	0	0	5.09e-06	2.27e-06	5.48e-06	4.3e-06	2.57e-06	1.69e-06	6.59e-06	4.93e-06	0	0	0	0	0	0	0	9.32e-08	0	1.82e-07	1.62e-07	0	0	0	6.38e-06	2.77e-06	0	1.16e-05	3.87e-06	3.34e-06
Environmental Information Processing	Signal transduction	02020 Two-component system [PATH:ko02020]	torC; trimethylamine-N-oxide reductase (cytochrome c) 1, cytochrome c-type subunit TorC	K03532	TMAO respiration	3.99e-06	8.51e-06	3.7e-06	6.7e-06	2.56e-06	6.9e-06	5.94e-06	1.2e-05	3.92e-06	5.2e-06	0	0	0	0	2.48e-06	0	2.04e-06	6.49e-07	1.1e-06	1.43e-06	9.35e-07	5.07e-06	2.63e-06	0	0	0	0	0	0	0	0	1.12e-06	6.19e-07	1.14e-06	3.78e-07	0	0	0	2.55e-05	2.77e-06	3.73e-06	1.59e-06	2.58e-06	0
Environmental Information Processing	Signal transduction	02020 Two-component system [PATH:ko02020]	torS; two-component system, OmpR family, sensor histidine kinase TorS [EC:2.7.13.3]	K07647	TMAO respiration	0	3.55e-07	2.46e-07	1.05e-06	2.14e-07	1.82e-07	1.35e-06	9.61e-06	1.17e-05	2.08e-05	7.51e-06	1.73e-05	1.58e-05	3.87e-06	3.47e-05	1.62e-05	3.26e-05	1.82e-05	2.08e-05	2.15e-05	2.1e-05	2.37e-05	1.84e-05	1.15e-05	0	0	0	0	0	0	0	3.73e-07	3.71e-07	2.73e-07	4.86e-07	5.71e-06	0	4.51e-05	9.56e-06	0	0	2.06e-05	1.68e-05	3.78e-05
Environmental Information Processing	Signal transduction	02020 Two-component system [PATH:ko02020]	torA; trimethylamine-N-oxide reductase (cytochrome c) 1 [EC:1.7.2.3]	K07811	TMAO respiration	4.56e-06	7.09e-06	8.13e-06	1e-05	1.37e-05	1.29e-05	7.83e-06	4.81e-06	7.83e-06	2.6e-06	3.76e-06	0	0	0	0	0	4.07e-06	2.6e-06	5.48e-06	5.73e-06	3.27e-06	6.76e-06	9.22e-06	3.28e-06	0	0	0	0	0	0	0	8.86e-06	9.66e-06	1.66e-05	1.51e-05	1.14e-05	2.16e-05	3.95e-05	5.1e-05	2.5e-05	2.24e-05	3.7e-06	5.16e-06	1.11e-06
Environmental Information Processing	Signal transduction	02020 Two-component system [PATH:ko02020]	comP; two-component system, NarL family, sensor histidine kinase ComP [EC:2.7.13.3]	K07680	Quorum sensing	0	0	7.15e-06	3.35e-06	5.13e-06	0	0	2.4e-06	0	0	0	0	0	0	2.48e-06	9.23e-06	1.02e-06	2.6e-06	3.29e-06	1.15e-05	1.87e-06	3.38e-06	6.59e-06	0	0	0	0	0	0	0	0	0	0	0	0	0	0	0	0	0	0	0	0	0
Environmental Information Processing	Membrane transport	03070 Bacterial secretion system [PATH:ko03070]	secB; preprotein translocase subunit SecB	K03071	Sec-SRP	7.47e-05	6.31e-05	8.7e-05	9.19e-05	9.1e-05	8.68e-05	7.45e-05	6.01e-05	0.000125	7.03e-05	0.000105	7.13e-05	6.6e-05	4.65e-05	0.000119	0.00012	0.000181	9.71e-05	8.66e-05	8.88e-05	0.000106	0.00011	0.00012	0.000161	0	0	0	3.14e-05	0	0.000216	0	8.14e-05	8.05e-05	0.000129	0.000136	0.000288	0.00039	0.000214	0.000274	0.000147	0.000295	8.51e-05	0.00011	8.46e-05
Environmental Information Processing	Membrane transport	03070 Bacterial secretion system [PATH:ko03070]	secE; preprotein translocase subunit SecE	K03073	Sec-SRP	3.19e-05	4.5e-05	4.83e-05	5.65e-05	4.53e-05	4.07e-05	6.83e-05	0.000267	0.000278	0.000252	0.000319	0.000315	0.000296	0.00026	0.000293	0.000282	0.000172	0.000187	0.000213	0.000178	0.000184	0.000191	0.000288	0.000245	3.37e-05	0	0	6.28e-05	7.37e-05	0.000504	0.000307	0.000264	0.000301	0.000221	0.000201	0.000248	0.000319	0.000119	0.00022	0.000194	0.000272	0.000117	9.55e-05	0.000102
Environmental Information Processing	Membrane transport	03070 Bacterial secretion system [PATH:ko03070]	yajC; preprotein translocase subunit YajC	K03210	Sec-SRP	4.22e-05	2.94e-05	4.29e-05	3.7e-05	3.61e-05	4.94e-05	5.45e-05	0.000221	0.000168	0.000271	0.000177	0.00016	0.000172	0.000136	0.000228	0.000231	0.00018	0.000193	0.000167	0.000218	0.000154	0.00021	0.000229	0.000212	0	0	0	6.28e-05	0	0.000216	0	0.000206	0.000188	0.000279	0.000303	0.000282	0.000363	0.000164	0.000328	0.000255	0.000313	0.000147	0.000123	0.000161
Environmental Information Processing	Membrane transport	03070 Bacterial secretion system [PATH:ko03070]	secG; preprotein translocase subunit SecG	K03075	Sec-SRP	8.84e-05	0.000119	7.27e-05	0.000102	9.76e-05	0.000101	0.000118	0.000336	0.000305	0.000362	0.000252	0.000307	0.000301	0.000252	0.000362	0.000342	0.000256	0.000256	0.000321	0.000256	0.000207	0.000271	0.000262	0.000205	0	0	0	0.000753	2.46e-05	0.000144	0.000745	0.000325	0.000337	0.000313	0.000287	0.000371	0.000379	0.000265	0.000398	0.000286	0.000328	0.00017	0.000147	0.000181
Environmental Information Processing	Membrane transport	03070 Bacterial secretion system [PATH:ko03070]	secDF; SecD/SecF fusion protein	K12257	Sec-SRP	1.14e-06	1.88e-05	3.18e-05	8.16e-06	2.33e-05	2.72e-06	3.56e-05	0.000495	0.000709	0.00077	0.000657	0.000549	0.000658	0.000713	0.000679	0.000713	0.000517	0.000672	0.000553	0.000689	0.000542	0.0006	0.000445	0.000136	5.06e-05	8.4e-05	0	0.000314	2.46e-05	7.2e-05	0.000745	0.000168	0.000178	0.000275	0.000261	0.00148046	0.000544	0.000666	0.00118912	0.000427	0.000667	0.000406	0.000407	0.000438
Environmental Information Processing	Membrane transport	03070 Bacterial secretion system [PATH:ko03070]	secF; preprotein translocase subunit SecF	K03074	Sec-SRP	6.27e-05	0.000204	0.000196	0.000202	0.00022	0.000178	0.000149	0.00036	0.000442	0.0005	0.000443	0.000603	0.000671	0.000523	0.000578	0.000536	0.00046	0.000511	0.000573	0.000537	0.000575	0.000509	0.000493	0.000466	0.000118	0	0	6.28e-05	0	0.000432	0.000219	0.000922	0.000763	0.000929	0.0009	0.000562	0.00095	0.000581	0.000539	0.000605	0.000805	0.000464	0.000574	0.000585
Environmental Information Processing	Membrane transport	03070 Bacterial secretion system [PATH:ko03070]	ftsY; fused signal recognition particle receptor	K03110	Sec-SRP	0.000553	0.000871	0.000812	0.00086	0.000728	0.000861	0.000797	0.000896	0.000748	0.0010539	0.000823	0.000979	0.00110673	0.000961	0.000972	0.000803	0.000933	0.00105379	0.000954	0.00102285	0.00091	0.00109052	0.00106695	0.00067	0.000405	0	0	0.000314	0.000221	0.00100792	0.000175	0.00146652	0.00153257	0.00123848	0.00123622	0.00123229	0.00124744	0.00116817	0.00123056	0.00117378	0.00112593	0.000953	0.00103888	0.000992
Environmental Information Processing	Membrane transport	03070 Bacterial secretion system [PATH:ko03070]	secD; preprotein translocase subunit SecD	K03072	Sec-SRP	0.000177	0.000255	0.00026	0.000368	0.000293	0.000325	0.000277	0.000743	0.000576	0.000885	0.000751	0.00089	0.000832	0.000903	0.000848	0.000815	0.000914	0.000901	0.00077	0.000765	0.000877	0.000889	0.000914	0.000933	0.000135	0	0	0.000533	4.92e-05	0.000504	0.000395	0.0016809	0.00160772	0.00160239	0.0015392	0.000936	0.00180486	0.00110045	0.0010616	0.00118488	0.00147638	0.000899	0.000892	0.00092
Environmental Information Processing	Membrane transport	03070 Bacterial secretion system [PATH:ko03070]	yidC, spoIIIJ, OXA1; preprotein translocase subunit YidC	K03217	Sec-SRP	0.000669	0.000822	0.000902	0.000841	0.000838	0.000781	0.000853	0.00111263	0.0010455	0.00106951	0.000808	0.000851	0.000824	0.000701	0.000972	0.00104103	0.00107201	0.000971	0.000935	0.0010028	0.000873	0.00101613	0.00105114	0.000961	0.000945	0.000202	4.78e-05	0.000345	0.000147	0.000504	0.000482	0.00209735	0.00217139	0.00188594	0.00177082	0.00148331	0.00192122	0.00115124	0.00149835	0.00128478	0.00190512	0.000879	0.00084	0.000828
Environmental Information Processing	Membrane transport	03070 Bacterial secretion system [PATH:ko03070]	SRP54, ffh; signal recognition particle subunit SRP54	K03106	Sec-SRP	0.00200685	0.00210312	0.00227249	0.00214485	0.00212106	0.00236907	0.00201126	0.00133372	0.00140184	0.00147806	0.00134859	0.00142597	0.00134181	0.00139062	0.00124227	0.00138497	0.0013815	0.00159416	0.00151253	0.0015615	0.00134783	0.00170426	0.0014766	0.000916	0.00129914	0.000538	0.000406	0.000533	0.000344	0.000864	0.00153441	0.00182777	0.00204957	0.00180076	0.00187313	0.00183987	0.0021837	0.00195258	0.00163225	0.00194243	0.00215491	0.00152531	0.00174738	0.0016021
Environmental Information Processing	Membrane transport	03070 Bacterial secretion system [PATH:ko03070]	secY; preprotein translocase subunit SecY	K03076	Sec-SRP	0.00217684	0.0018319	0.00194221	0.00179958	0.00187205	0.00176722	0.00164151	0.00141302	0.00139009	0.00178773	0.00154018	0.0015772	0.0014818	0.00156493	0.0016638	0.00165042	0.0013815	0.00149966	0.00143795	0.00138529	0.0012747	0.00157915	0.00141733	0.000839	0.00027	3.36e-05	0.000311	0.000565	0.000344	0.00072	0.0016221	0.00210742	0.00205985	0.00222843	0.00228198	0.00180849	0.00227029	0.00192437	0.0018841	0.00180091	0.00199833	0.00137997	0.00143636	0.00135622
Environmental Information Processing	Membrane transport	03070 Bacterial secretion system [PATH:ko03070]	secA; preprotein translocase subunit SecA	K03070	Sec-SRP	0.00614205	0.00599667	0.00551066	0.00561448	0.00501157	0.00553746	0.00475206	0.00270348	0.00258439	0.00285724	0.00273476	0.00340503	0.00333868	0.00326157	0.00294575	0.00318081	0.00299206	0.00327632	0.00319726	0.00320752	0.00284681	0.00340176	0.00290711	0.00171264	0.000152	0	0	0.000471	0.000295	0.00223182	0.00223586	0.00434072	0.00409345	0.00436268	0.00431375	0.00475514	0.00448645	0.00402368	0.00436754	0.00372669	0.00429865	0.00351624	0.00397484	0.00349346
Environmental Information Processing	Membrane transport	03070 Bacterial secretion system [PATH:ko03070]	hlyD, cyaD; hemolysin D	K11003	Type I secretion system	0	4.61e-06	2.96e-06	0	8.12e-06	1.82e-07	1.35e-06	9.61e-06	0	1.04e-05	7.51e-06	2.16e-06	2.64e-06	3.87e-06	4.96e-06	4.62e-06	1.63e-05	1.04e-05	6.58e-06	4.3e-06	6.31e-06	1.01e-05	0.000112	0.000125	0	0	0	0	0	0	0	2.8e-07	9.9e-07	1.86e-06	1.13e-06	2.85e-06	2.71e-06	2.26e-05	1.28e-05	0	3.73e-06	1.96e-05	2.97e-05	4.45e-05
Environmental Information Processing	Membrane transport	02010 ABC transporters [PATH:ko02010]	hlyB, cyaB; ATP-binding cassette, subfamily B, bacterial HlyB/CyaB	K11004	Type I secretion system	9.13e-06	7.8e-06	6.16e-06	1.8e-05	1.86e-05	5.63e-06	9.45e-06	4.57e-05	2.74e-05	4.16e-05	2.63e-05	2.81e-05	2.91e-05	1.94e-05	9.92e-06	2.08e-05	5.8e-05	4.35e-05	4.5e-05	2.58e-05	4.42e-05	3.21e-05	0.000333	0.000491	0	1.68e-05	0	0	4.92e-05	0	0	2.18e-05	1.42e-05	1.48e-05	1.6e-05	2.28e-05	1.35e-05	0.000124	6.06e-05	1.39e-05	1.86e-05	0.000128	0.000128	0.000134
Environmental Information Processing	Membrane transport	03070 Bacterial secretion system [PATH:ko03070]	gspO; general secretion pathway protein O [EC:3.4.23.43 2.1.1.-]	K02464	Type II secretion system	0	0	4.93e-07	0	0	0	0	4.81e-06	3.92e-06	0	0	0	5.28e-06	0	0	4.62e-06	0	2.27e-06	3.29e-06	2.87e-06	1.87e-06	1.69e-06	0	0	0	0	0	6.28e-05	0	0	0	7.46e-07	1.86e-06	7.28e-07	7.56e-07	5.71e-06	0	0	6.38e-06	2.77e-06	0	2.64e-06	0	6.68e-06
Environmental Information Processing	Membrane transport	03070 Bacterial secretion system [PATH:ko03070]	gspH; general secretion pathway protein H	K02457	Type II secretion system	1.71e-06	7.09e-07	2.96e-06	8.37e-07	3.63e-06	2e-06	1.62e-06	1.68e-05	0	2.6e-06	0	4.32e-06	2.64e-06	0	2.48e-06	6.92e-06	2.14e-05	9.09e-06	1.97e-05	1e-05	9.81e-06	1.52e-05	0.000169	0.000406	0	0	0	3.14e-05	0	0	0	3.73e-07	1.24e-07	1.55e-06	9.72e-07	2.85e-06	5.41e-06	0	3.51e-05	1.11e-05	0	2.17e-05	1.55e-05	2.23e-05
Environmental Information Processing	Membrane transport	03070 Bacterial secretion system [PATH:ko03070]	gspI; general secretion pathway protein I	K02458	Type II secretion system	1.71e-06	9.57e-06	2.46e-06	1.67e-06	2.35e-06	3.09e-06	3.78e-06	9.61e-06	3.92e-06	1.56e-05	0	2.16e-06	0	7.75e-06	1.74e-05	1.62e-05	1.73e-05	1.53e-05	6.58e-06	1e-05	1.24e-05	1.69e-05	0.000267	0.000368	0	0	0	3.14e-05	0	0	0	3.73e-07	1.24e-07	9.1e-07	3.78e-07	2.85e-06	5.41e-06	2.82e-05	3.19e-05	0	0	1e-05	1.55e-05	1.11e-05
Environmental Information Processing	Membrane transport	03070 Bacterial secretion system [PATH:ko03070]	gspJ; general secretion pathway protein J	K02459	Type II secretion system	5.7e-07	1.06e-06	3.7e-06	2.72e-06	1.07e-06	3.63e-06	1.89e-06	3.6e-05	1.96e-05	1.04e-05	7.51e-06	6.48e-06	5.28e-06	0	2.73e-05	9.23e-06	2.75e-05	2.01e-05	2.3e-05	2.01e-05	1.33e-05	3.04e-05	0.000267	0.000586	0	0	0	6.28e-05	0	0	0	2.33e-06	1.11e-06	2.18e-06	1.78e-06	5.71e-06	8.12e-06	0	2.87e-05	8.32e-06	0	1.53e-05	1.03e-05	1.89e-05
Environmental Information Processing	Membrane transport	03070 Bacterial secretion system [PATH:ko03070]	gspC; general secretion pathway protein C	K02452	Type II secretion system	0	2.13e-06	2.46e-06	1.88e-06	1.71e-06	4.18e-06	1.08e-06	1.2e-05	1.57e-05	1.04e-05	3.76e-06	6.48e-06	5.28e-06	3.87e-06	1.24e-05	2.31e-06	1.53e-05	1.27e-05	5.48e-06	1.72e-05	7.71e-06	1.69e-05	0.000344	0.000627	0	0	0	6.28e-05	2.46e-05	0	0	9.32e-07	2.1e-06	3.18e-06	1.13e-06	2.85e-06	0	1.13e-05	4.14e-05	2.22e-05	0	2.38e-05	1.94e-05	3.12e-05
Environmental Information Processing	Membrane transport	03070 Bacterial secretion system [PATH:ko03070]	gspL; general secretion pathway protein L	K02461	Type II secretion system	0	2.48e-06	6.16e-06	2.93e-06	2.56e-06	5.27e-06	7.56e-06	1.44e-05	2.74e-05	7.81e-06	0	8.64e-06	5.28e-06	0	3.72e-05	1.85e-05	2.04e-05	1.79e-05	1.54e-05	1.29e-05	1.71e-05	1.86e-05	0.000587	0.00086	0	0	0	3.14e-05	2.46e-05	0.000144	4.38e-05	6.53e-07	1.24e-06	2.23e-06	1.13e-06	0	2.71e-06	0	2.87e-05	1.11e-05	0	3.12e-05	2.58e-05	3.56e-05
Environmental Information Processing	Membrane transport	03070 Bacterial secretion system [PATH:ko03070]	gspK; general secretion pathway protein K	K02460	Type II secretion system	2.85e-06	1.77e-06	8.13e-06	6.07e-06	2.14e-06	3.45e-06	5.13e-06	2.64e-05	2.35e-05	7.81e-06	4.13e-05	6.48e-06	7.92e-06	0	1.98e-05	1.15e-05	3.77e-05	3.51e-05	3.95e-05	2.58e-05	2.36e-05	4.56e-05	0.000383	0.00065	0	0	0	0.000126	0	0	0	1.31e-06	1.36e-06	2.27e-06	1.4e-06	1.14e-05	2.71e-06	2.26e-05	4.14e-05	2.22e-05	7.46e-06	4.18e-05	4.52e-05	3.78e-05
Environmental Information Processing	Membrane transport	03070 Bacterial secretion system [PATH:ko03070]	gspF; general secretion pathway protein F	K02455	Type II secretion system	2.57e-05	2.02e-05	2.83e-05	2.59e-05	2.99e-05	2.45e-05	2.73e-05	7.69e-05	7.83e-05	8.07e-05	9.39e-05	6.7e-05	5.55e-05	6.2e-05	0.000169	0.00012	0.000221	0.000158	0.00018	0.000163	0.000148	0.000184	0.000674	0.00119868	0	0	0	0.00022	0.000123	0	0.000307	2.37e-05	3.11e-05	2.65e-05	2.27e-05	9.7e-05	0.000127	0.000282	0.000386	0.000114	0.000104	0.00021	0.000203	0.000256
Environmental Information Processing	Membrane transport	03070 Bacterial secretion system [PATH:ko03070]	gspG; general secretion pathway protein G	K02456	Type II secretion system	3.88e-05	3.83e-05	3.4e-05	3.47e-05	5.32e-05	3.4e-05	4.53e-05	6.49e-05	3.52e-05	6.77e-05	6.39e-05	5.62e-05	4.49e-05	6.2e-05	0.000117	9.69e-05	0.000158	9.26e-05	0.000124	0.000117	9.81e-05	0.000101	0.000394	0.000731	0	0	0	0.000126	2.46e-05	7.2e-05	0.000219	3.07e-05	3.65e-05	4.86e-05	5.37e-05	5.13e-05	0.000103	0.00013	0.000124	8.05e-05	8.2e-05	0.00017	0.000185	0.000167
Environmental Information Processing	Membrane transport	03070 Bacterial secretion system [PATH:ko03070]	gspD; general secretion pathway protein D	K02453	Type II secretion system	2.45e-05	3.16e-05	4.86e-05	3.83e-05	4.08e-05	4.4e-05	3.89e-05	0.00013	0.000133	0.000125	0.000147	0.000117	0.000122	0.000105	0.000218	0.000261	0.000339	0.000246	0.000263	0.000268	0.000205	0.000257	0.00174927	0.00301642	0	0	0	0.00022	0.000295	0.000864	0.000833	0.000106	0.000111	0.000135	0.000111	0.000248	0.000365	0.000632	0.000593	0.000391	0.000324	0.000382	0.000346	0.000358
Environmental Information Processing	Membrane transport	03070 Bacterial secretion system [PATH:ko03070]	gspE; general secretion pathway protein E	K02454	Type II secretion system	0.000206	0.000324	0.00038	0.000284	0.000338	0.000426	0.000213	0.00032	0.000302	0.000343	0.000338	0.000482	0.000581	0.000473	0.000531	0.000563	0.000828	0.000636	0.000593	0.000617	0.000626	0.000686	0.00130537	0.00212808	0	0.00109198	9.56e-05	0.000251	9.83e-05	0.000864	0.00113985	0.000343	0.000366	0.00041	0.000378	0.000445	0.000549	0.00156884	0.0013517	0.000599	0.000432	0.00139371	0.00141959	0.00155871
Environmental Information Processing	Membrane transport	03070 Bacterial secretion system [PATH:ko03070]	yscS; type III secretion protein SctS	K03227	Type III secretion system	0	3.55e-07	1.23e-06	0	2.14e-07	1.82e-07	1.08e-06	4.81e-06	0	2.6e-06	0	0	0	0	0	2.31e-06	8.14e-06	2.92e-06	4.39e-06	1.43e-06	5.61e-06	3.38e-06	4.08e-05	0.00014	0	0	0	0	0	0	0	1.86e-07	8.67e-07	4.09e-07	1.08e-07	0	0	1.13e-05	0	0	3.73e-06	5.29e-07	6.45e-06	3.34e-06
Environmental Information Processing	Membrane transport	03070 Bacterial secretion system [PATH:ko03070]	yscT; type III secretion protein SctT	K03228	Type III secretion system	5.7e-07	3.55e-07	2.22e-06	4.19e-07	1.28e-06	1.82e-06	1.89e-06	7.21e-06	0	0	0	0	2.64e-06	3.87e-06	7.44e-06	4.62e-06	2.04e-06	3.9e-06	6.58e-06	2.87e-06	3.74e-06	8.45e-06	0.000154	0.000281	0	0	0	0	0	0	0	3.73e-07	1.24e-07	1.82e-07	0	0	5.41e-06	0	6.38e-06	0	0	3.17e-06	5.16e-06	5.56e-06
Environmental Information Processing	Membrane transport	03070 Bacterial secretion system [PATH:ko03070]	yscJ; type III secretion protein SctJ	K03222	Type III secretion system	1.71e-06	1.77e-06	4.19e-06	8.37e-07	2.99e-06	3.45e-06	2.7e-06	0	7.83e-06	0	1.13e-05	2.16e-06	0	0	4.96e-06	9.23e-06	6.11e-06	7.79e-06	9.87e-06	8.6e-06	5.14e-06	1.69e-06	0.000141	0.000384	0	0	0	6.28e-05	0	0	0	9.32e-08	4.95e-07	4.55e-08	5.4e-08	0	0	1.13e-05	0	0	0	7.4e-06	3.87e-06	1.67e-05
Environmental Information Processing	Membrane transport	03070 Bacterial secretion system [PATH:ko03070]	yscU; type III secretion protein SctU	K03229	Type III secretion system	5.7e-07	3.19e-06	1.73e-06	0	2.78e-06	1.82e-07	2.97e-06	1.2e-05	3.13e-05	5.2e-06	3.76e-06	2.16e-06	5.28e-06	7.75e-06	1.49e-05	4.62e-06	1.12e-05	1.33e-05	3.29e-06	1.43e-05	7.24e-06	3.55e-05	0.000249	0.000514	0	0	0	3.14e-05	0	0	0	1.31e-06	8.67e-07	6.82e-07	2.05e-06	5.71e-06	0	0	9.56e-06	2.77e-06	0	8.46e-06	1.68e-05	1.89e-05
Environmental Information Processing	Membrane transport	03070 Bacterial secretion system [PATH:ko03070]	yscR; type III secretion protein SctR	K03226	Type III secretion system	9.13e-06	9.57e-06	1.48e-05	9.21e-06	6.19e-06	7.63e-06	8.1e-07	2.64e-05	7.83e-06	2.6e-06	1.5e-05	4.32e-06	0	7.75e-06	0	0	1.02e-05	1.82e-05	1.32e-05	1.15e-05	8.88e-06	1.86e-05	0.000142	0.000274	0	0	0	6.28e-05	0	0	0	7.46e-07	1.98e-06	8.64e-07	4.32e-07	1.14e-05	0	1.69e-05	9.56e-06	0	0	3.38e-05	2.19e-05	3.56e-05
Environmental Information Processing	Membrane transport	03070 Bacterial secretion system [PATH:ko03070]	yscN; ATP synthase in type III secretion protein SctN [EC:3.6.3.14]	K03224	Type III secretion system	7.42e-06	7.45e-06	7.64e-06	4.39e-06	1.09e-05	8.9e-06	7.83e-06	2.64e-05	2.74e-05	2.34e-05	3.76e-06	1.08e-05	7.92e-06	7.75e-06	0	2.31e-06	2.44e-05	2.7e-05	2.3e-05	3.29e-05	1.68e-05	2.54e-05	0.000258	0.000529	0	0	0	0	0	0	0	2.52e-06	3.59e-06	1.68e-06	1.3e-06	5.71e-06	0	2.82e-05	3.83e-05	2.77e-06	0	2.64e-05	2.84e-05	3.78e-05
Environmental Information Processing	Membrane transport	03070 Bacterial secretion system [PATH:ko03070]	yscV; type III secretion protein SctV	K03230	Type III secretion system	5.7e-06	1.17e-05	3.2e-06	3.56e-06	2.56e-06	2.36e-06	1.13e-05	4.09e-05	2.74e-05	0	7.51e-06	4.32e-06	0	0	7.44e-06	2.31e-06	3.05e-05	3.28e-05	3.18e-05	3.72e-05	3.27e-05	4.06e-05	0.000325	0.000759	0	0	0	0.000188	0	0.000144	0	2.24e-06	4.33e-06	2.5e-06	3.19e-06	2.57e-05	0	6.77e-05	5.1e-05	0	0	7.24e-05	6.45e-05	8.01e-05
Environmental Information Processing	Membrane transport	03070 Bacterial secretion system [PATH:ko03070]	virB1; type IV secretion system protein VirB1	K03194	Type IV pili	2.28e-06	2.13e-06	3.94e-06	3.77e-06	3.2e-06	2.91e-06	7.56e-06	1.44e-05	7.83e-06	5.2e-06	0	0	5.28e-06	0	2.48e-06	0	4.07e-06	3.25e-06	3.29e-06	5.73e-06	4.44e-06	1.35e-05	1.84e-05	0.000136	0	0	0	0	0	0	0	0	0	0	5.4e-08	0	0	0	0	0	0	6.34e-06	0	1.11e-06
Environmental Information Processing	Signal transduction	02020 Two-component system [PATH:ko02020]	pilK; type IV pilus assembly protein PilK	K02661	Type IV pili	5.7e-07	7.09e-07	5.67e-06	2.72e-06	2.56e-06	0	2.97e-06	7.21e-06	7.83e-06	0	0	0	0	0	0	0	1.02e-06	1.95e-06	1.1e-06	2.87e-06	2.34e-07	1.69e-06	0.000145	0.000217	0	0	0	0	0	0	0	0	0	9.1e-08	2.7e-07	0	0	0	0	0	0	0	0	1.11e-06
Environmental Information Processing	Membrane transport	03070 Bacterial secretion system [PATH:ko03070]	virB8, lvhB8; type IV secretion system protein VirB8	K03203	Type IV pili	4.56e-06	4.96e-06	8.13e-06	1.67e-06	9.61e-06	5.81e-06	9.45e-06	4.33e-05	1.17e-05	1.82e-05	7.51e-06	4.32e-06	5.28e-06	1.16e-05	0	4.62e-06	1.02e-05	9.09e-06	4.39e-06	1.43e-05	6.31e-06	8.45e-06	2.11e-05	3.45e-05	0	0	0	0	0	0	0	9.32e-08	2.48e-07	0	5.4e-08	1.71e-05	0	1.69e-05	1.28e-05	5.55e-06	3.73e-06	6.87e-06	5.16e-06	6.68e-06
Environmental Information Processing	Membrane transport	03070 Bacterial secretion system [PATH:ko03070]	virB6, lvhB6; type IV secretion system protein VirB6	K03201	Type IV pili	1.08e-05	7.8e-06	1.26e-05	7.95e-06	1.32e-05	1.27e-05	1.4e-05	4.81e-05	1.96e-05	1.3e-05	1.13e-05	4.32e-06	5.28e-06	3.87e-06	1.98e-05	2.08e-05	1.12e-05	1.79e-05	1.97e-05	3.01e-05	1.03e-05	2.03e-05	1.84e-05	4.6e-05	0	0	0	0.000126	0	0.00100792	0.000395	7.46e-07	8.67e-07	4.55e-07	8.64e-07	2.28e-05	2.71e-06	1.69e-05	9.56e-06	0	0	1.11e-05	1.55e-05	1.89e-05
Environmental Information Processing	Membrane transport	03070 Bacterial secretion system [PATH:ko03070]	virB3, lvhB3; type IV secretion system protein VirB3	K03198	Type IV pili	1.43e-05	1.77e-05	1.82e-05	1.05e-05	1.35e-05	2.02e-05	1.54e-05	1.68e-05	1.17e-05	1.56e-05	3.76e-06	8.64e-06	7.92e-06	1.55e-05	1.74e-05	1.38e-05	2.95e-05	1.01e-05	1.21e-05	1.43e-05	1.17e-05	1.35e-05	2.77e-05	5.25e-05	0	0	0	0	2.46e-05	0	0	4.66e-07	9.9e-07	7.28e-07	4.86e-07	2.85e-05	0	2.26e-05	1.59e-05	0	0	1.53e-05	1.55e-05	1e-05
Environmental Information Processing	Signal transduction	02020 Two-component system [PATH:ko02020]	pilI; twitching motility protein PilI	K02659	Type IV pili	1.2e-05	1.38e-05	1.45e-05	1.21e-05	1.47e-05	1.47e-05	1.3e-05	2.16e-05	7.83e-06	2.6e-05	4.13e-05	3.02e-05	2.91e-05	0	2.23e-05	2.31e-06	3.46e-05	1.53e-05	2.19e-05	1.43e-05	8.18e-06	1.52e-05	0.000148	0.000181	0	0	0	0	0	0	4.38e-05	4.66e-07	7.43e-07	1.82e-07	6.48e-07	0	0	2.26e-05	2.55e-05	0	0	1.11e-05	2.45e-05	1.89e-05
Environmental Information Processing	Membrane transport	03070 Bacterial secretion system [PATH:ko03070]	virB2, lvhB2; type IV secretion system protein VirB2	K03197	Type IV pili	2.51e-05	3.16e-05	2.34e-05	1.61e-05	1.86e-05	1.63e-05	1.38e-05	2.64e-05	1.17e-05	1.04e-05	0	1.3e-05	1.58e-05	7.75e-06	2.98e-05	2.54e-05	4.28e-05	1.4e-05	2.19e-05	7.16e-06	1.26e-05	2.37e-05	2.63e-05	4.6e-05	0	0	0	3.14e-05	0	0	0	1.4e-06	4.95e-07	4.55e-07	4.86e-07	1.14e-05	0	2.26e-05	1.59e-05	8.32e-06	7.46e-06	1.32e-05	1.16e-05	2.23e-05
Environmental Information Processing	Membrane transport	03070 Bacterial secretion system [PATH:ko03070]	virB9, lvhB9; type IV secretion system protein VirB9	K03204	Type IV pili	5.25e-05	6.13e-05	4.41e-05	3.72e-05	5.23e-05	3.71e-05	4.02e-05	6.01e-05	4.31e-05	2.86e-05	5.63e-05	1.3e-05	1.58e-05	1.55e-05	2.48e-05	1.38e-05	7.94e-05	2.92e-05	4.72e-05	3.58e-05	1.85e-05	2.87e-05	8.69e-05	0.000156	0	0	0	0	0	0	4.38e-05	1.68e-06	3.22e-06	9.55e-07	3.02e-06	4.85e-05	0	6.21e-05	2.55e-05	8.32e-06	0	3.17e-05	2.84e-05	3.12e-05
Environmental Information Processing	Signal transduction	02020 Two-component system [PATH:ko02020]	pilH; twitching motility two-component system response regulator PilH	K02658	Type IV pili	5.31e-05	4.04e-05	5e-05	2.68e-05	2.84e-05	3.02e-05	5.13e-05	3.12e-05	3.92e-05	6.77e-05	5.63e-05	2.38e-05	3.17e-05	5.04e-05	3.97e-05	2.31e-05	3.87e-05	3.47e-05	4.28e-05	4.58e-05	2.5e-05	4.56e-05	0.000105	0.000143	0	0	0	0	0	0	0.000175	1.12e-06	1.36e-06	1.36e-06	1.57e-06	3.14e-05	0	0.000102	7.65e-05	5.55e-06	0	5.29e-05	5.29e-05	6.68e-05
Environmental Information Processing	Membrane transport	03070 Bacterial secretion system [PATH:ko03070]	virB10, lvhB10; type IV secretion system protein VirB10	K03195	Type IV pili	3.99e-05	4.43e-05	3.75e-05	3.56e-05	5.32e-05	3.09e-05	3.4e-05	5.29e-05	3.52e-05	2.86e-05	6.39e-05	2.38e-05	1.58e-05	1.94e-05	4.96e-05	1.15e-05	9.98e-05	4.68e-05	2.85e-05	5.44e-05	3.2e-05	5.92e-05	0.000132	0.000268	0	0	0	9.41e-05	4.92e-05	0.000216	4.38e-05	1.49e-06	1.61e-06	1.18e-06	3.73e-06	2.85e-05	2.71e-06	2.26e-05	3.51e-05	1.94e-05	3.73e-06	2.85e-05	2.71e-05	4.78e-05
Environmental Information Processing	Signal transduction	02020 Two-component system [PATH:ko02020]	pilG; twitching motility two-component system response regulator PilG	K02657	Type IV pili	7.13e-05	5e-05	5.35e-05	5.04e-05	6.64e-05	5.98e-05	3.16e-05	6.49e-05	3.13e-05	3.9e-05	4.88e-05	3.89e-05	3.43e-05	4.26e-05	1.49e-05	2.08e-05	4.68e-05	2.99e-05	2.74e-05	3.44e-05	1.96e-05	3.38e-05	8.96e-05	0.00014	0	0	0	0	0	0.000216	0	8.39e-07	7.43e-07	5e-07	8.64e-07	1.71e-05	0	7.34e-05	8.29e-05	0	1.12e-05	3.96e-05	7.87e-05	5.23e-05
Environmental Information Processing	Signal transduction	02020 Two-component system [PATH:ko02020]	pilS; two-component system, NtrC family, sensor histidine kinase PilS [EC:2.7.13.3]	K02668	Type IV pili	1.6e-05	4.25e-06	4.93e-06	7.74e-06	3.2e-05	4.54e-06	8.91e-06	3.36e-05	6.27e-05	2.86e-05	3.38e-05	3.24e-05	2.64e-05	2.71e-05	7.44e-05	7.16e-05	0.000115	9.42e-05	8.88e-05	8.74e-05	7.27e-05	8.45e-05	0.000274	0.00034	0	0	0	0	2.46e-05	0	0	3.08e-06	4.09e-06	2.27e-06	3.46e-06	4.85e-05	1.62e-05	0.000124	7.01e-05	2.5e-05	2.61e-05	0.000128	0.000114	0.000149
Environmental Information Processing	Membrane transport	03070 Bacterial secretion system [PATH:ko03070]	virB11, lvhB11; type IV secretion system protein VirB11	K03196	Type IV pili	3.37e-05	7.59e-05	6.46e-05	4.56e-05	0.000108	5.65e-05	4.45e-05	8.65e-05	7.83e-05	3.9e-05	9.39e-05	4.97e-05	2.91e-05	4.26e-05	5.21e-05	2.77e-05	8.55e-05	5.1e-05	6.25e-05	8.02e-05	6.19e-05	6.42e-05	0.000128	0.000218	0	0	0	0.000188	2.46e-05	7.2e-05	4.38e-05	2.14e-06	4.09e-06	1.73e-06	4.32e-06	6.28e-05	8.12e-06	3.95e-05	6.69e-05	8.32e-06	1.12e-05	7.61e-05	4e-05	7.01e-05
Environmental Information Processing	Signal transduction	02020 Two-component system [PATH:ko02020]	pilJ; twitching motility protein PilJ	K02660	Type IV pili	3.48e-05	3.3e-05	7.59e-05	4.06e-05	3.29e-05	8.76e-05	4.35e-05	0.00013	9.4e-05	0.000101	0.000165	5.19e-05	7.4e-05	7.36e-05	9.17e-05	6.92e-05	0.000159	8.7e-05	0.000115	0.000109	6.14e-05	0.000171	0.000541	0.000627	0	0	0	6.28e-05	0	0.000144	8.77e-05	1.96e-06	2.97e-06	1.14e-06	4.05e-06	5.42e-05	0	0.000265	0.000179	2.5e-05	1.49e-05	0.000109	9.94e-05	0.000158
Environmental Information Processing	Membrane transport	03070 Bacterial secretion system [PATH:ko03070]	virB4, lvhB4; type IV secretion system protein VirB4	K03199	Type IV pili	0.000173	0.000284	0.000223	0.000222	0.000293	0.000195	0.00015	0.000142	0.000161	9.63e-05	9.39e-05	6.27e-05	5.02e-05	5.04e-05	9.17e-05	8.08e-05	0.000204	0.000126	0.000135	0.000152	0.000107	0.000122	0.000279	0.000667	0	0	0	6.28e-05	0.000147	0.000144	0.000175	6.62e-06	1.13e-05	6e-06	1.12e-05	0.000114	8.12e-06	0.000141	0.000179	4.44e-05	2.24e-05	0.000135	0.000116	0.000176
Environmental Information Processing	Signal transduction	02020 Two-component system [PATH:ko02020]	pilR; two-component system, NtrC family, response regulator PilR	K02667	Type IV pili	2.8e-05	3.01e-05	5.87e-05	2.68e-05	5.89e-05	4.31e-05	3.94e-05	7.93e-05	0.00011	8.07e-05	9.02e-05	4.11e-05	5.55e-05	5.81e-05	0.000109	0.000122	0.000277	0.000178	0.000188	0.000208	0.000156	0.000191	0.000315	0.00045	0.000118	0	0	6.28e-05	9.83e-05	0.000216	0.000395	1.61e-05	2.2e-05	2.02e-05	1.84e-05	0.000128	6.49e-05	0.000485	0.000351	6.66e-05	8.2e-05	0.000576	0.000565	0.000565
Environmental Information Processing	Membrane transport	03070 Bacterial secretion system [PATH:ko03070]	virD4, lvhD4; type IV secretion system protein VirD4	K03205	Type IV pili	0.000148	0.000274	0.000303	0.000317	0.00037	0.000353	0.00033	0.000442	0.000309	0.000297	0.000278	6.27e-05	5.55e-05	7.36e-05	5.95e-05	5.77e-05	0.000177	0.000167	0.000169	0.000223	9.95e-05	0.000186	0.000402	0.000488	0	3.36e-05	0	0.000157	7.37e-05	0.000144	8.77e-05	3.26e-06	7.55e-06	2.23e-06	9.24e-06	0.000126	1.35e-05	0.000164	8.61e-05	3.33e-05	0	8.77e-05	0.000101	0.00011
Environmental Information Processing	Signal transduction	02020 Two-component system [PATH:ko02020]	pilA; type IV pilus assembly protein PilA	K02650	Type IV pili	2.22e-05	8.86e-06	9.12e-06	7.95e-06	4.06e-06	1.09e-05	2.56e-05	6.49e-05	8.22e-05	6.77e-05	7.51e-05	9.29e-05	0.000114	9.3e-05	0.000129	0.000138	0.000107	8.12e-05	9.1e-05	8.45e-05	6.75e-05	0.000115	0.000177	0.000289	0	0	0	9.41e-05	4.92e-05	0	8.77e-05	0.000118	0.000112	0.000191	0.000176	0.000137	0.000165	0.000282	0.000239	5.83e-05	0.000224	0.000174	0.000208	0.000194
Environmental Information Processing	Membrane transport	03070 Bacterial secretion system [PATH:ko03070]	vasD, lip; type VI secretion system protein VasD	K11906	Type VI secretion system	3.42e-06	3.19e-06	5.42e-06	2.3e-06	5.55e-06	3.81e-06	1.35e-06	2.4e-06	1.96e-05	7.81e-06	3.76e-06	1.08e-05	7.92e-06	7.75e-06	2.48e-06	1.15e-05	1.73e-05	9.42e-06	3.29e-06	1.15e-05	5.14e-06	6.76e-06	0.000196	0.000335	0	0	0	0	0	0	0	5.59e-07	3.71e-07	1.82e-07	4.86e-07	2.85e-06	0	0	6.38e-06	0	0	8.98e-06	7.74e-06	1e-05
Environmental Information Processing	Membrane transport	03070 Bacterial secretion system [PATH:ko03070]	stp1, pppA; serine/threonine protein phosphatase Stp1 [EC:3.1.3.16]	K11915	Type VI secretion system	0	1.42e-06	0	1.88e-06	0	2e-06	2.97e-06	9.61e-06	7.83e-06	2.6e-06	3.76e-06	8.64e-06	2.64e-06	0	7.44e-06	6.92e-06	7.13e-06	1.23e-05	9.87e-06	5.73e-06	9.58e-06	6.76e-06	0.000274	0.000397	0	0	0	0	0	0	8.77e-05	1.86e-07	1.24e-07	3.18e-07	2.16e-07	1.43e-05	0	2.26e-05	3.19e-05	2.77e-06	3.73e-06	1.22e-05	2.58e-06	7.79e-06
Environmental Information Processing	Membrane transport	03070 Bacterial secretion system [PATH:ko03070]	impK, ompA, vasF, dotU; type VI secretion system protein ImpK	K11892	Type VI secretion system	2.05e-05	1.84e-05	3.08e-05	1.46e-05	7.69e-06	2e-05	1.4e-05	5.77e-05	3.52e-05	2.34e-05	1.13e-05	1.3e-05	1.58e-05	0	2.73e-05	2.77e-05	5.09e-05	4.16e-05	4.17e-05	3.44e-05	3.95e-05	5.75e-05	0.000493	0.000992	0	0	0	0	0	0	8.77e-05	5.59e-07	7.43e-07	5.46e-07	8.64e-07	8.56e-06	0	5.64e-06	2.55e-05	2.77e-06	0	5.71e-05	4.13e-05	6.68e-05
Environmental Information Processing	Membrane transport	03070 Bacterial secretion system [PATH:ko03070]	ppkA; serine/threonine-protein kinase PpkA [EC:2.7.11.1]	K11921	Type VI secretion system	0	0	1.73e-06	0	0	0	0	7.21e-06	1.17e-05	5.2e-06	3.38e-05	4.32e-05	6.34e-05	0	2.23e-05	1.62e-05	4.99e-05	5e-05	4.83e-05	3.87e-05	4.95e-05	2.71e-05	0.000535	0.00081	0	0	0	6.28e-05	0	0	0	1.77e-06	2.85e-06	2.32e-06	3.94e-06	1.43e-05	0	0.000181	6.06e-05	5.55e-06	0	0.000167	0.00019	0.000159
Environmental Information Processing	Membrane transport	03070 Bacterial secretion system [PATH:ko03070]	vgrG; type VI secretion system secreted protein VgrG	K11904	Type VI secretion system	8.56e-06	1.99e-05	2.69e-05	6.7e-06	1.05e-05	8.54e-06	1.03e-05	2.16e-05	1.96e-05	1.56e-05	1.5e-05	2.16e-06	1.06e-05	7.75e-06	4.96e-06	4.62e-06	4.78e-05	3.64e-05	5.81e-05	4.15e-05	2.59e-05	8.62e-05	0.00122765	0.00219868	0	0	0	6.28e-05	0	0	0.000307	2.8e-06	1.98e-06	1.09e-06	3.46e-06	2e-05	1.35e-05	0.000102	9.56e-06	8.32e-06	0	0.000122	0.000123	9.46e-05
Environmental Information Processing	Membrane transport	03070 Bacterial secretion system [PATH:ko03070]	impL, vasK, icmF; type VI secretion system protein ImpL	K11891	Type VI secretion system	1.2e-05	3.58e-05	7.71e-05	2.55e-05	3.16e-05	5.65e-05	4.59e-05	0.000142	0.000157	0.000146	0.000116	1.94e-05	1.58e-05	4.26e-05	5.7e-05	6.69e-05	0.00024	0.000128	0.000159	0.000145	0.000119	0.000223	0.00176639	0.00332676	0.000236	0	0	3.14e-05	2.46e-05	0.000144	4.38e-05	4.1e-06	2.97e-06	9.55e-07	4.32e-06	1.71e-05	8.12e-06	5.08e-05	0.000121	2.22e-05	7.46e-06	0.000159	0.000143	0.00015
Environmental Information Processing	Membrane transport	03070 Bacterial secretion system [PATH:ko03070]	vasG, clpV; type VI secretion system protein VasG	K11907	Type VI secretion system	0.000141	0.00022	0.000205	0.000203	0.0002	0.000193	0.000103	0.000113	0.000141	9.89e-05	0.000101	5.19e-05	0.000132	7.75e-05	0.000112	0.000152	0.000345	0.000232	0.000249	0.000281	0.000195	0.000274	0.00161096	0.00284729	3.37e-05	0	0	0.000126	4.92e-05	0.000648	0.000395	1.56e-05	1.67e-05	5.82e-06	1.15e-05	8.27e-05	8.93e-05	0.000293	0.000182	3.88e-05	2.61e-05	0.000383	0.000401	0.000423
Environmental Information Processing	Signal transduction	02020 Two-component system [PATH:ko02020]	devS; two-component system, NarL family, sensor histidine kinase DevS [EC:2.7.13.3]	K07682	Virulence	0	0	0	0	0	0	0	9.61e-06	7.83e-06	1.82e-05	2.25e-05	2.16e-05	1.85e-05	1.55e-05	2.48e-06	1.85e-05	6.11e-06	7.14e-06	6.58e-06	4.3e-06	1.4e-05	1.69e-05	1.32e-06	1.64e-06	0	0	0	0	0	0	0	0	0	0	0	0	0	0	0	0	0	1.11e-05	6.45e-06	3.34e-06
Environmental Information Processing	Signal transduction	02020 Two-component system [PATH:ko02020]	devR; two-component system, NarL family, response regulator DevR	K07695	Virulence	0	0	0	0	0	0	0	2.64e-05	7.83e-06	1.3e-05	7.51e-06	2.81e-05	3.17e-05	1.94e-05	1.74e-05	2.08e-05	1.12e-05	1.75e-05	1.54e-05	1.86e-05	2.24e-05	1.69e-05	2.63e-06	0	0	0	0	0	0	0	0	2.8e-07	2.48e-07	1.82e-07	5.4e-08	5.71e-06	0	0	0	0	0	1.8e-05	1.55e-05	2e-05
Environmental Information Processing	Signal transduction	02020 Two-component system [PATH:ko02020]	rpfC; two-component system, sensor histidine kinase RpfC [EC:2.7.13.3]	K10715	Virulence	0	0	0	0	0	0	0	7.21e-06	2.35e-05	3.64e-05	1.88e-05	2.16e-05	3.43e-05	4.26e-05	5.21e-05	1.15e-05	5.6e-05	3.6e-05	3.84e-05	1.43e-05	3.46e-05	3.21e-05	3.95e-06	0	3.37e-05	0	0	0	0	7.2e-05	4.38e-05	1.86e-07	2.48e-07	5.46e-07	3.78e-07	5.71e-06	2.71e-06	4.51e-05	3.19e-05	0	3.73e-06	3.38e-05	2.84e-05	4.01e-05
Environmental Information Processing	Signal transduction	02020 Two-component system [PATH:ko02020]	rpfF; DSF synthase	K13816	Virulence	1.08e-05	6.74e-06	1.06e-05	3.56e-06	5.13e-06	7.08e-06	3.78e-06	1.2e-05	1.17e-05	4.42e-05	1.5e-05	1.94e-05	2.64e-05	1.55e-05	4.96e-06	1.85e-05	3.66e-05	2.99e-05	2.63e-05	2.15e-05	3.15e-05	1.18e-05	2.11e-05	5.58e-05	0	0	0	3.14e-05	2.46e-05	0	0	1.86e-07	4.95e-07	2.27e-07	3.78e-07	2.28e-05	0	2.82e-05	1.28e-05	0	0	4.23e-05	4.26e-05	4.01e-05
Environmental Information Processing	Signal transduction	02020 Two-component system [PATH:ko02020]	rpfG; two-component system, response regulator RpfG	K13815	Virulence	5.7e-07	9.22e-06	1.18e-05	0	3.2e-06	1.11e-05	1.11e-05	1.2e-05	1.17e-05	2.08e-05	7.51e-06	2.59e-05	1.06e-05	3.87e-05	1.49e-05	3.23e-05	5.5e-05	2.79e-05	3.18e-05	2.72e-05	2.99e-05	3.04e-05	1.71e-05	2.3e-05	0	0	0	0	0	0	0	9.32e-08	3.71e-07	1.36e-07	1.08e-07	0	0	5.64e-05	2.23e-05	2.77e-06	0	5.02e-05	4.39e-05	4.34e-05
Metabolism	Energy metabolism	00910 Nitrogen metabolism [PATH:ko00910]	narB; ferredoxin-nitrate reductase [EC:1.7.7.2]	K00367	Assimilatory nitrate reduction to ammonia	4.96e-05	2.48e-05	4.09e-05	4e-05	1.86e-05	1.89e-05	0.000276	1.68e-05	7.83e-06	3.9e-05	5.26e-05	7.13e-05	8.98e-05	5.42e-05	9.92e-06	1.62e-05	2.34e-05	1.36e-05	3.07e-05	2.01e-05	2.03e-05	1.69e-05	9.22e-06	1.64e-06	0	0	0	0	0	0.000288	0	0.000162	0.000197	0.000229	0.000139	2.85e-05	1.35e-05	5.64e-05	2.87e-05	0.000136	4.85e-05	1.11e-05	1.94e-05	1.34e-05
Metabolism	Energy metabolism	00910 Nitrogen metabolism [PATH:ko00910]	nirA; ferredoxin-nitrite reductase [EC:1.7.7.1]	K00366	Assimilatory nitrate reduction to ammonia	0.00107929	0.00117388	0.00101843	0.0012618	0.000999	0.00118172	0.000816	0.000425	0.000329	0.000463	0.000511	0.000812	0.000874	0.000856	0.000548	0.000656	0.000459	0.000471	0.000567	0.000513	0.000672	0.000512	0.00024	8.21e-05	0	0	0	0	0.000147	0.000144	8.77e-05	0.000177	0.000201	0.000222	0.000141	1.43e-05	5.14e-05	0.000141	8.93e-05	0.000164	8.2e-05	0.000544	0.000529	0.000418
Metabolism	Energy metabolism	00910 Nitrogen metabolism [PATH:ko00910]	norD; nitric-oxide reductase NorD protein [EC:1.7.99.7]	K02448	Denitrification	3.42e-06	2.84e-06	2.46e-07	1.46e-06	8.54e-07	1.63e-06	1.89e-06	1.2e-05	2.35e-05	2.08e-05	7.51e-06	8.64e-06	0	7.75e-06	4.96e-06	2.31e-06	1.63e-05	8.77e-06	5.48e-06	1.15e-05	7.01e-06	8.45e-06	8.17e-05	0.000167	0	0	0	0	0	7.2e-05	0	1.86e-07	0	9.1e-08	6.48e-07	2.85e-06	0	0	3.51e-05	0	0	6.34e-06	1.29e-05	1.11e-05
Metabolism	Energy metabolism	00910 Nitrogen metabolism [PATH:ko00910]	napB; cytochrome c-type protein NapB	K02568	Denitrification	1.25e-05	2.06e-05	1.01e-05	1.57e-05	1.58e-05	1.82e-05	1.19e-05	1.68e-05	1.96e-05	1.04e-05	7.51e-06	0	1.06e-05	7.75e-06	7.44e-06	1.15e-05	1.83e-05	1.07e-05	1.86e-05	1.15e-05	1.21e-05	1.01e-05	8.17e-05	0.000138	0	0	0	0	0	7.2e-05	0	1.86e-07	7.43e-07	0	5.4e-08	1.71e-05	0	2.82e-05	9.56e-06	0	0	1.9e-05	1.03e-05	1.45e-05
Environmental Information Processing	Signal transduction	02020 Two-component system [PATH:ko02020]	narJ; nitrate reductase 1, delta subunit	K00373	Denitrification	1.25e-05	2.09e-05	2.61e-05	1.13e-05	2.31e-05	1.2e-05	2.89e-05	0.000115	9.01e-05	7.29e-05	8.64e-05	1.08e-05	0	5.04e-05	1.98e-05	1.62e-05	4.68e-05	6.95e-05	6.91e-05	7.59e-05	3.53e-05	6.93e-05	0.0002	0.000246	0	0	0	0	0	0.000216	0	1.86e-07	9.9e-07	1.82e-07	3.78e-07	1.14e-05	2.71e-06	5.64e-06	6.38e-06	0	0	1.43e-05	3.23e-05	2.23e-05
Metabolism	Energy metabolism	00910 Nitrogen metabolism [PATH:ko00910]	norC; nitric oxide reductase subunit C	K02305	Denitrification	6.79e-05	6.49e-05	7.12e-05	6.38e-05	5.72e-05	5.99e-05	6.05e-05	3.12e-05	1.17e-05	1.04e-05	2.25e-05	8.64e-06	1.06e-05	7.75e-06	9.92e-06	1.85e-05	3.77e-05	2.21e-05	2.41e-05	3.44e-05	1.28e-05	2.54e-05	0.000162	0.000212	0	0	0	0	0	0	0	9.32e-08	0	2.27e-07	1.08e-07	1.14e-05	0	3.39e-05	6.38e-06	0	0	4.23e-06	5.16e-06	4.45e-06
Metabolism	Energy metabolism	00910 Nitrogen metabolism [PATH:ko00910]	norF; nitric-oxide reductase NorF protein [EC:1.7.99.7]	K04747	Denitrification	0.0002	0.000228	0.000152	0.000182	0.000176	0.000188	0.000107	4.09e-05	4.31e-05	4.42e-05	0.000109	6.27e-05	5.28e-05	4.26e-05	5.46e-05	7.16e-05	0.000109	8.96e-05	6.14e-05	8.17e-05	8.06e-05	8.12e-05	0.000194	0.000233	0	0	0	0	0	0	0	2.42e-05	2.85e-05	2.96e-05	2.9e-05	3.99e-05	6.22e-05	0.000164	0.000112	0.000114	4.85e-05	0.000132	0.000152	0.000154
Metabolism	Energy metabolism	00910 Nitrogen metabolism [PATH:ko00910]	nosZ; nitrous-oxide reductase [EC:1.7.2.4]	K00376	Denitrification	0.000418	0.000349	0.000239	0.00028	0.000374	0.000255	0.000233	0.000214	0.000223	0.000133	0.000105	8.64e-06	2.64e-05	1.55e-05	5.46e-05	4.39e-05	0.000109	8.93e-05	8.12e-05	0.000116	4.74e-05	0.00014	0.000544	0.000806	0	0	0	9.41e-05	0	0.000144	0	7.83e-06	1.19e-05	1.58e-05	2.67e-05	8.27e-05	8.12e-06	0.000237	0.000172	1.39e-05	0	0.000129	0.00012	0.000116
Metabolism	Energy metabolism	00910 Nitrogen metabolism [PATH:ko00910]	norB; nitric oxide reductase subunit B [EC:1.7.2.5]	K04561	Denitrification	0.000969	0.000934	0.000777	0.000792	0.000857	0.000886	0.00069	0.00024	0.000208	0.000177	0.000162	7.56e-05	0.000114	9.68e-05	6.94e-05	6.46e-05	0.000163	0.000173	0.000145	0.000241	0.000103	0.000205	0.000489	0.000724	0.000236	0	0	0.000126	0.000147	0.000432	0.000263	2.33e-06	1.11e-06	4.09e-07	9.72e-07	5.71e-05	5.41e-06	0.000141	9.56e-05	2.5e-05	0	0.000399	0.00045	0.000369
Environmental Information Processing	Signal transduction	02020 Two-component system [PATH:ko02020]	nreB; two-component system, NarL family, sensor histidine kinase NreB [EC:2.7.13.3]	K07683	Dissimilatory nitrate reduction to ammonia	0	0	1.73e-06	1.05e-06	1.71e-06	3.45e-06	4.05e-06	1.44e-05	3.13e-05	1.56e-05	1.13e-05	0	0	3.87e-06	4.96e-06	9.23e-06	6.11e-06	1.3e-05	5.48e-06	5.73e-06	1.17e-06	2.03e-05	1.71e-05	4.93e-06	0	0	0	0	0	0	0	0	0	4.55e-08	0	0	0	0	0	0	0	0	0	1.11e-06
Metabolism	Energy metabolism	00910 Nitrogen metabolism [PATH:ko00910]	napB; cytochrome c-type protein NapB	K02568	Dissimilatory nitrate reduction to ammonia	1.25e-05	2.06e-05	1.01e-05	1.57e-05	1.58e-05	1.82e-05	1.19e-05	1.68e-05	1.96e-05	1.04e-05	7.51e-06	0	1.06e-05	7.75e-06	7.44e-06	1.15e-05	1.83e-05	1.07e-05	1.86e-05	1.15e-05	1.21e-05	1.01e-05	8.17e-05	0.000138	0	0	0	0	0	7.2e-05	0	1.86e-07	7.43e-07	0	5.4e-08	1.71e-05	0	2.82e-05	9.56e-06	0	0	1.9e-05	1.03e-05	1.45e-05
Environmental Information Processing	Signal transduction	02020 Two-component system [PATH:ko02020]	nreC; two-component system, NarL family, response regulator NreC	K07696	Dissimilatory nitrate reduction to ammonia	3.42e-06	4.61e-06	7.89e-06	1.03e-05	9.61e-06	1.31e-05	1.38e-05	7.21e-05	4.7e-05	6.51e-05	4.88e-05	1.73e-05	4.23e-05	3.87e-05	2.73e-05	5.08e-05	5.5e-05	4.71e-05	6.03e-05	7.31e-05	4.63e-05	4.56e-05	3.16e-05	2.96e-05	0	0	0	0	0	0	0	4.66e-07	1.24e-07	9.1e-08	1.62e-07	2.85e-06	0	5.64e-06	3.19e-06	0	0	3.75e-05	4.13e-05	4.78e-05
Metabolism	Energy metabolism	00910 Nitrogen metabolism [PATH:ko00910]	nifT; nitrogen fixation protein NifT	K02593	Nitrogen fixation	3.42e-06	2.48e-06	2.22e-06	2.09e-06	4.91e-06	1.27e-06	1.08e-06	0	0	0	3.76e-06	0	0	3.87e-06	0	2.31e-06	0	0	2.19e-06	0	4.67e-07	5.07e-06	1.32e-06	0	0	0	0	0	0	0	0	0	2.48e-07	0	0	0	0	5.64e-06	1.28e-05	0	0	0	0	0
Metabolism	Energy metabolism	00910 Nitrogen metabolism [PATH:ko00910]	nifB; nitrogen fixation protein NifB	K02585	Nitrogen fixation	5.7e-06	7.45e-06	5.67e-06	7.11e-06	4.06e-06	1.18e-05	8.64e-06	1.68e-05	0	0	0	0	0	0	0	0	1.53e-05	1.95e-06	6.58e-06	1.43e-06	5.37e-06	8.45e-06	5.27e-06	4.93e-06	0	0	0	0	0	0	0	6.53e-07	3.71e-07	9.1e-08	0	0	0	0	7.33e-05	0	0	0	0	0
Metabolism	Energy metabolism	00910 Nitrogen metabolism [PATH:ko00910]	nifK; nitrogenase molybdenum-iron protein beta chain [EC:1.18.6.1]	K02591	Nitrogen fixation	7.47e-05	4.89e-05	3.65e-05	4.39e-05	6.68e-05	5.1e-05	4.4e-05	9.61e-06	2.35e-05	5.2e-06	7.51e-06	2.38e-05	2.64e-06	0	0	0	2.04e-05	5.85e-06	1.54e-05	0	7.71e-06	1.52e-05	5.27e-06	0	0	0	0	0	0.000246	0	0	5.59e-07	1.11e-06	9.1e-08	2.16e-07	0	2.71e-06	4.51e-05	9.56e-05	5.55e-06	0	0	0	0
Metabolism	Energy metabolism	00910 Nitrogen metabolism [PATH:ko00910]	nifD; nitrogenase molybdenum-iron protein alpha chain [EC:1.18.6.1]	K02586	Nitrogen fixation	7.93e-05	7.2e-05	5.13e-05	4.75e-05	6.68e-05	5.56e-05	4.24e-05	1.44e-05	3.52e-05	1.3e-05	1.13e-05	0	7.92e-06	0	0	0	2.14e-05	7.14e-06	3.29e-06	1.43e-06	4.91e-06	1.35e-05	1.19e-05	6.57e-06	0	0	0	0	0	0	0	0	7.43e-07	9.1e-08	1.62e-07	1.43e-05	0	3.39e-05	0.000128	2.77e-06	0	1.06e-06	1.29e-06	0
Environmental Information Processing	Signal transduction	02020 Two-component system [PATH:ko02020]	nifA; Nif-specific regulatory protein	K02584	Nitrogen fixation	1.54e-05	1.13e-05	1.55e-05	1.03e-05	1.28e-05	1.58e-05	1.13e-05	5.29e-05	4.7e-05	0.000122	8.26e-05	0.000153	0.000116	0.000143	0.000146	0.00015	0.000269	0.000204	0.000203	0.000195	0.000183	0.000191	0.000115	7.22e-05	1.69e-05	0	0	0	4.92e-05	0.000144	4.38e-05	4.67e-05	5.68e-05	5.34e-05	5.52e-05	9.7e-05	6.76e-05	0.000435	0.000274	0.000103	9.69e-05	0.000835	0.000999	0.000947
Environmental Information Processing	Signal transduction	02020 Two-component system [PATH:ko02020]	ntrY; two-component system, NtrC family, nitrogen regulation sensor histidine kinase NtrY [EC:2.7.13.3]	K13598	Nitrogen fixation	2.51e-05	1.28e-05	1.48e-05	3.43e-05	3.95e-05	3.65e-05	2.64e-05	0.000111	0.000114	0.000133	0.000162	0.000179	0.000145	0.000143	0.000216	0.000185	0.000288	0.000231	0.000234	0.000239	0.000238	0.000164	8.96e-05	2.79e-05	0	0	0	9.41e-05	7.37e-05	0	0.000219	0.000472	0.000362	0.000692	0.000722	0.000505	0.000733	0.000361	0.000383	0.000364	0.000772	0.000233	0.000279	0.000286
Environmental Information Processing	Signal transduction	02020 Two-component system [PATH:ko02020]	ntrX; two-component system, NtrC family, nitrogen regulation response regulator NtrX	K13599	Nitrogen fixation	0.000157	0.000203	0.000176	0.000167	0.000186	0.000243	0.000138	0.000113	0.000106	9.89e-05	0.000143	0.00013	0.000151	0.00019	0.000298	0.000229	0.000395	0.000318	0.000312	0.000285	0.000325	0.000284	0.000124	5.09e-05	0	0	0	0.000157	2.46e-05	7.2e-05	8.77e-05	0.000548	0.000502	0.000816	0.000872	0.000445	0.000674	0.000485	0.000481	0.000375	0.000846	0.000496	0.000503308	0.000501
Metabolism	Xenobiotics biodegradation and metabolism	00621 Dioxin degradation [PATH:ko00621]	bphB; cis-2,3-dihydrobiphenyl-2,3-diol dehydrogenase [EC:1.3.1.56]	K08690	Degradation of aromatic compounds	0	0	0	0	0	0	0	0	3.92e-06	0	0	0	2.64e-06	3.87e-06	0	0	0	2.27e-06	2.19e-06	4.3e-06	1.87e-06	0	3.95e-06	2.79e-05	0	0	0	0	0	0	0	9.32e-08	1.24e-07	0	0	0	0	0	0	0	0	1.59e-06	2.58e-06	0
Metabolism	Xenobiotics biodegradation and metabolism	00621 Dioxin degradation [PATH:ko00621]	bphB; cis-2,3-dihydrobiphenyl-2,3-diol dehydrogenase [EC:1.3.1.56]	K08690	Degradation of aromatic compounds	0	0	0	0	0	0	0	0	3.92e-06	0	0	0	2.64e-06	3.87e-06	0	0	0	2.27e-06	2.19e-06	4.3e-06	1.87e-06	0	3.95e-06	2.79e-05	0	0	0	0	0	0	0	9.32e-08	1.24e-07	0	0	0	0	0	0	0	0	1.59e-06	2.58e-06	0
Metabolism	Xenobiotics biodegradation and metabolism	00623 Toluene degradation [PATH:ko00623]	bbsE; benzylsuccinate CoA-transferase BbsE subunit [EC:2.8.3.15]	K07543	Degradation of aromatic compounds	0	0	0	0	0	0	0	0	0	0	0	2.16e-06	0	0	0	4.62e-06	1.02e-06	6.17e-06	5.48e-06	0	3.97e-06	0	0	0	0	0	0	0	0	0	0	0	0	1.82e-07	5.4e-08	0	0	0	0	0	0	5.81e-06	0	5.56e-06
Metabolism	Xenobiotics biodegradation and metabolism	00622 Xylene degradation [PATH:ko00622]	cymB; p-cumic alcohol dehydrogenase	K10617	Degradation of aromatic compounds	0	0	0	0	0	0	0	2.4e-06	3.92e-06	0	0	0	5.28e-06	3.87e-06	0	0	2.04e-06	2.27e-06	0	4.3e-06	0	0	0	0	0	0	0	0	0	0	0	4.66e-07	1.11e-06	9.55e-07	7.56e-07	5.71e-06	0	5.64e-06	0	0	0	0	3.87e-06	1.11e-06
Metabolism	Xenobiotics biodegradation and metabolism	00623 Toluene degradation [PATH:ko00623]	bbsD; 2-[hydroxy(phenyl)methyl]-succinyl-CoA dehydrogenase BbsD subunit [EC:1.1.1.35]	K07548	Degradation of aromatic compounds	0	0	0	0	0	0	0	0	0	0	3.76e-06	6.48e-06	0	0	0	0	2.04e-06	2.27e-06	2.19e-06	4.3e-06	2.1e-06	1.69e-06	0	0	0	0	0	0	0	0	0	7.46e-07	7.43e-07	7.73e-07	8.1e-07	0	0	0	0	0	0	5.29e-06	0	3.34e-06
Metabolism	Xenobiotics biodegradation and metabolism	00621 Dioxin degradation [PATH:ko00621]	bphA; biphenyl 2,3-dioxygenase subunit alpha [EC:1.14.12.18]	K08689	Degradation of aromatic compounds	4.56e-06	7.09e-07	4.93e-07	0	2.35e-06	5.45e-07	2.7e-07	2.4e-06	0	0	0	4.32e-06	0	0	2.48e-06	0	0	1.95e-06	1.1e-06	2.87e-06	1.17e-06	1.69e-06	1.32e-06	4.27e-05	0	0	0	0	0	0	0	3.73e-07	1.24e-07	9.1e-08	1.08e-07	2.85e-06	0	5.64e-06	0	0	3.73e-06	3.7e-06	3.87e-06	3.34e-06
Metabolism	Xenobiotics biodegradation and metabolism	00361 Chlorocyclohexane and chlorobenzene degradation [PATH:ko00361]	bedC1, todC1; benzene/toluene dioxygenase subunit alpha [EC:1.14.12.3 1.14.12.11]	K03268	Degradation of aromatic compounds	0	0	0	8.37e-07	0	0	1.08e-06	7.21e-06	3.92e-06	2.6e-06	3.76e-06	0	5.28e-06	0	1.49e-05	6.92e-06	4.07e-06	1.95e-06	5.48e-06	0	2.57e-06	0	1.32e-06	0	0	0	0	0	0	0	0	5.59e-07	6.19e-07	2.27e-07	2.7e-07	0	0	1.13e-05	0	0	0	7.4e-06	5.16e-06	7.79e-06
Metabolism	Xenobiotics biodegradation and metabolism	00791 Atrazine degradation [PATH:ko00791]	E4.2.1.69; cyanamide hydratase [EC:4.2.1.69]	K06035	Degradation of aromatic compounds	2.28e-06	7.09e-07	5.92e-06	8.37e-07	8.54e-06	4.18e-06	1.89e-06	2.16e-05	6.27e-05	1.56e-05	1.88e-05	2.16e-06	0	1.94e-05	2.48e-06	1.15e-05	1.02e-06	1.95e-06	2.19e-06	1.43e-06	4.67e-07	3.38e-06	0	0	0	0	0	6.28e-05	0	0	0	0	0	0	0	0	0	0	0	0	0	0	0	0
Metabolism	Xenobiotics biodegradation and metabolism	00622 Xylene degradation [PATH:ko00622]	cymC; p-cumic aldehyde dehydrogenase	K10618	Degradation of aromatic compounds	0	0	0	0	0	0	0	0	0	2.6e-06	0	2.16e-06	0	0	2.48e-06	0	5.09e-06	2.92e-06	3.29e-06	2.87e-06	1.4e-06	5.07e-06	5.27e-06	0	0	0	2.39e-05	0	0	0	0	3.73e-07	8.67e-07	2.73e-06	2.48e-06	2.85e-06	0	1.13e-05	0	0	0	5.29e-06	9.03e-06	3.34e-06
Metabolism	Xenobiotics biodegradation and metabolism	00362 Benzoate degradation [PATH:ko00362]	badF; benzoyl-CoA reductase subunit [EC:1.3.7.8]	K04114	Degradation of aromatic compounds	7.42e-06	2.48e-06	4.93e-07	2.09e-06	1.49e-06	6.9e-06	1.08e-06	0	0	0	0	0	0	0	0	0	4.07e-06	6.49e-07	2.19e-06	0	7.01e-07	0	0	1.64e-06	0	0	0	0	0	0	0	9.32e-07	1.24e-06	1.64e-06	3.4e-06	0	0	1.13e-05	0	0	0	0	0	0
Metabolism	Xenobiotics biodegradation and metabolism	00622 Xylene degradation [PATH:ko00622]	cymAa; p-cymene monooxygenase [EC:1.14.13.-]	K10616	Degradation of aromatic compounds	0	0	0	0	2.14e-07	0	0	4.81e-06	0	0	0	4.32e-06	2.64e-06	0	0	0	0	0	2.19e-06	0	2.34e-07	0	0	0	0	0	0	0	0	0	0	3.82e-06	4.09e-06	3.41e-06	2.65e-06	0	0	0	3.19e-06	0	0	1.06e-06	1.29e-06	2.23e-06
Metabolism	Xenobiotics biodegradation and metabolism	00362 Benzoate degradation [PATH:ko00362]	dch; cyclohexa-1,5-dienecarbonyl-CoA hydratase [EC:4.2.1.100]	K07537	Degradation of aromatic compounds	0	0	0	2.09e-07	1.07e-06	0	2.7e-07	0	0	0	0	0	0	0	0	0	1.02e-06	1.95e-06	0	1.43e-06	2.34e-07	1.18e-05	0	0	0	0	0	0	0	0	0	0	0	8.64e-07	1.67e-06	0	0	0	0	0	0	2.64e-06	7.74e-06	8.9e-06
Metabolism	Xenobiotics biodegradation and metabolism	00622 Xylene degradation [PATH:ko00622]	cmtAb; p-cumate 2,3-dioxygenase subunit alpha [EC:1.14.12.-]	K10619	Degradation of aromatic compounds	0	0	0	0	0	0	0	2.16e-05	1.57e-05	1.04e-05	1.88e-05	2.16e-06	5.28e-06	3.87e-06	0	2.31e-06	3.05e-06	6.17e-06	3.29e-06	7.16e-06	3.5e-06	0	7.9e-06	3.28e-06	0	0	0	0	0	0	0	4.66e-07	7.43e-07	6.37e-07	4.32e-07	5.71e-06	0	2.26e-05	0	0	0	1.06e-05	1.55e-05	2e-05
Metabolism	Xenobiotics biodegradation and metabolism	00642 Ethylbenzene degradation [PATH:ko00642]	apc; acetophenone carboxylase [EC:6.4.1.8]	K10701	Degradation of aromatic compounds	0	0	0	0	0	0	0	4.81e-06	1.17e-05	7.81e-06	0	1.08e-05	2.38e-05	7.75e-06	0	4.62e-06	3.05e-06	8.77e-06	5.48e-06	5.73e-06	9.11e-06	8.45e-06	2.63e-06	1.64e-06	0	0	0	0	0	0	0	3.73e-07	9.9e-07	2.73e-07	8.64e-07	0	0	0	3.19e-06	0	0	1.48e-05	1.42e-05	4.45e-06
Metabolism	Xenobiotics biodegradation and metabolism	00362 Benzoate degradation [PATH:ko00362]	E1.3.1.62; pimeloyl-CoA dehydrogenase [EC:1.3.1.62]	K04118	Degradation of aromatic compounds	0	0	7.39e-07	7.53e-06	4.27e-07	0	3.78e-06	2.4e-06	0	2.6e-06	0	2.16e-06	5.28e-06	3.87e-06	0	0	3.05e-06	1.95e-06	6.58e-06	5.73e-06	5.14e-06	3.38e-06	3.03e-05	2.3e-05	0	0	0	0	0	0	0	8.39e-07	1.73e-06	1.09e-06	1.84e-06	0	2.71e-06	5.64e-06	6.38e-06	0	1.86e-05	5.81e-06	1.29e-05	6.68e-06
Metabolism	Xenobiotics biodegradation and metabolism	00363 Bisphenol degradation [PATH:ko00363]	E1.13.11.41; 2,4'-dihydroxyacetophenone dioxygenase [EC:1.13.11.41]	K05913	Degradation of aromatic compounds	2.28e-06	3.9e-06	2.22e-06	1.26e-06	8.54e-07	3.09e-06	8.1e-07	4.81e-06	3.92e-06	5.2e-06	1.5e-05	1.94e-05	2.38e-05	1.94e-05	1.24e-05	1.62e-05	3.05e-06	4.87e-06	6.58e-06	4.3e-06	7.94e-06	3.38e-06	8.69e-05	0.0002	0	0	0	0	0	0	0	0	0	0	0	0	0	0	0	0	0	8.98e-06	5.16e-06	6.68e-06
Metabolism	Xenobiotics biodegradation and metabolism	00791 Atrazine degradation [PATH:ko00791]	atzC; N-isopropylammelide isopropylaminohydrolase [EC:3.5.99.4]	K08710	Degradation of aromatic compounds	0	1.99e-05	5.67e-06	4.39e-06	3.84e-06	3.81e-06	0	1.92e-05	1.57e-05	2.86e-05	7.51e-06	1.94e-05	1.58e-05	1.94e-05	7.44e-06	9.23e-06	1.12e-05	1.14e-05	1.32e-05	1.43e-05	1.43e-05	1.01e-05	2.63e-06	1.64e-06	0	0	0	0	0	0	0	0	1.24e-07	0	0	0	0	0	0	0	0	8.98e-06	5.16e-06	1.22e-05
Metabolism	Xenobiotics biodegradation and metabolism	00624 Polycyclic aromatic hydrocarbon degradation [PATH:ko00624]	E1.14.12.7; phthalate 4,5-dioxygenase [EC:1.14.12.7]	K18068	Degradation of aromatic compounds	2.85e-06	0	2.46e-07	2.09e-06	0	2.72e-06	2.7e-07	2.16e-05	2.74e-05	2.86e-05	3.76e-05	1.08e-05	2.11e-05	1.55e-05	1.24e-05	1.85e-05	2.24e-05	2.66e-05	2.96e-05	1.29e-05	2.9e-05	2.2e-05	2.63e-05	7.72e-05	0	0	0	0	0	0	0	9.32e-08	7.43e-07	6.82e-07	4.32e-07	2.85e-06	0	1.13e-05	3.19e-06	2.77e-06	0	2.06e-05	1.81e-05	1.22e-05
Metabolism	Xenobiotics biodegradation and metabolism	00627 Aminobenzoate degradation [PATH:ko00627]	desB, galA; gallate dioxygenase [EC:1.13.11.57]	K04099	Degradation of aromatic compounds	2.28e-05	1.63e-05	2.02e-05	1.95e-05	1.45e-05	1.63e-05	1.16e-05	2.4e-06	1.17e-05	7.81e-06	3.76e-06	8.64e-06	5.28e-06	0	4.96e-06	2.31e-06	2.75e-05	1.3e-05	1.32e-05	2.72e-05	1.21e-05	1.86e-05	1.05e-05	2.13e-05	0	0	0	0	0	0	0	1.86e-06	1.49e-06	1.73e-06	2.65e-06	0	8.12e-06	5.64e-06	3.19e-06	8.32e-06	3.73e-06	3.33e-05	5.68e-05	6.56e-05
Metabolism	Xenobiotics biodegradation and metabolism	00362 Benzoate degradation [PATH:ko00362]	ligA; protocatechuate 4,5-dioxygenase, alpha chain [EC:1.13.11.8]	K04100	Degradation of aromatic compounds	3.02e-05	1.74e-05	1.21e-05	1.36e-05	2.46e-05	1.89e-05	1.05e-05	2.16e-05	0	2.6e-06	1.88e-05	6.48e-06	5.28e-06	7.75e-06	1.98e-05	4.62e-06	1.53e-05	1.3e-05	2.41e-05	1.43e-05	1.73e-05	1.35e-05	3.82e-05	2.46e-05	0	0	0	0	0	0	0	6.53e-06	9.9e-06	5.91e-06	6.1e-06	2.28e-05	1.89e-05	6.77e-05	1.59e-05	1.94e-05	7.46e-06	2.7e-05	2.45e-05	2.34e-05
Metabolism	Xenobiotics biodegradation and metabolism	00627 Aminobenzoate degradation [PATH:ko00627]	E5.1.2.2; mandelate racemase [EC:5.1.2.2]	K01781	Degradation of aromatic compounds	0	0	0	0	0	0	0	1.2e-05	1.96e-05	3.38e-05	7.14e-05	0.00014	0.000108	7.36e-05	5.46e-05	4.39e-05	3.66e-05	2.57e-05	3.62e-05	2.15e-05	3.32e-05	1.18e-05	3.95e-06	1.64e-06	0	0	0	0	0	0	0	4.76e-06	6.93e-06	5.09e-06	6.05e-06	1.14e-05	0	3.39e-05	3.51e-05	1.39e-05	0	9.46e-05	9.68e-05	6.9e-05
Metabolism	Xenobiotics biodegradation and metabolism	00362 Benzoate degradation [PATH:ko00362]	badI; 2-ketocyclohexanecarboxyl-CoA hydrolase [EC:3.1.2.-]	K07536	Degradation of aromatic compounds	3.37e-05	4.29e-05	1.26e-05	5.65e-05	3.69e-05	4.03e-05	1.51e-05	1.44e-05	1.57e-05	7.81e-06	1.5e-05	2.16e-06	1.85e-05	3.87e-06	2.23e-05	1.38e-05	7.13e-06	9.74e-06	5.48e-06	1.15e-05	8.64e-06	1.01e-05	3.69e-05	3.28e-05	0	0	0	0	0	0	0	6.15e-06	1.24e-05	4.37e-06	6.64e-06	2e-05	1.08e-05	4.51e-05	6.38e-06	0	3.73e-06	1.8e-05	3.23e-05	2.34e-05
Metabolism	Xenobiotics biodegradation and metabolism	00643 Styrene degradation [PATH:ko00643]	E1.14.13.63, phacB; 3-hydroxyphenylacetate 6-hydroxylase [EC:1.14.13.63]	K10438	Degradation of aromatic compounds	3.25e-05	1.1e-05	6.29e-05	2.62e-05	6.49e-05	6.98e-05	0.000127	2.88e-05	3.13e-05	2.34e-05	4.88e-05	0	0	0	1.24e-05	0	1.02e-06	2.27e-06	5.48e-06	7.16e-06	2.57e-06	8.45e-06	0	0	1.69e-05	0	0	3.14e-05	0	0	0	0	0	0	0	0	0	0	0	0	0	0	0	0
Metabolism	Xenobiotics biodegradation and metabolism	00643 Styrene degradation [PATH:ko00643]	E3.5.5.7; aliphatic nitrilase [EC:3.5.5.7]	K01502	Degradation of aromatic compounds	2.22e-05	3.86e-05	2.07e-05	1.55e-05	2.67e-05	2.14e-05	1.27e-05	6.97e-05	0.000102	5.46e-05	7.89e-05	5.4e-05	6.87e-05	8.52e-05	5.21e-05	4.62e-05	3.16e-05	3.21e-05	3.18e-05	2.58e-05	3.55e-05	1.52e-05	6.45e-05	0.000171	0.000118	1.68e-05	0	0	7.37e-05	0	4.38e-05	9.88e-06	2.15e-05	1.02e-05	7.78e-06	5.71e-06	8.12e-06	2.82e-05	3.19e-05	2.5e-05	2.61e-05	5.29e-05	4.26e-05	3.78e-05
Metabolism	Xenobiotics biodegradation and metabolism	00362 Benzoate degradation [PATH:ko00362]	hbaA; 4-hydroxybenzoate-CoA ligase [EC:6.2.1.27 6.2.1.25]	K04105	Degradation of aromatic compounds	0	0	0	0	0	0	5.4e-07	4.81e-06	7.83e-06	1.3e-05	1.88e-05	3.24e-05	1.58e-05	1.55e-05	1.49e-05	1.38e-05	2.95e-05	1.56e-05	1.75e-05	1.43e-05	1.96e-05	5.07e-06	1.45e-05	4.93e-06	0	0	0	0	0	0	0.000132	1.41e-05	2.97e-05	2.36e-05	2.83e-05	0.000225	4.33e-05	0.000192	7.97e-05	5.83e-05	4.47e-05	5.44e-05	0.000102	5.34e-05
Metabolism	Xenobiotics biodegradation and metabolism	00362 Benzoate degradation [PATH:ko00362]	benD-xylL; dihydroxycyclohexadiene carboxylate dehydrogenase [EC:1.3.1.25 1.3.1.-]	K05783	Degradation of aromatic compounds	8.56e-06	3.08e-05	3.13e-05	3.68e-05	5.64e-05	4.9e-05	2.73e-05	7.45e-05	6.66e-05	6.77e-05	9.02e-05	1.73e-05	3.96e-05	5.42e-05	3.47e-05	3.23e-05	5.9e-05	6.69e-05	4.39e-05	4.73e-05	3.11e-05	7.1e-05	0.000332	0.000419	0	0	0	0	2.46e-05	0	0	1.59e-06	3.96e-06	2.18e-06	3.84e-06	0	0	1.13e-05	6.38e-06	0	0	1.32e-05	3.87e-06	1.56e-05
Metabolism	Xenobiotics biodegradation and metabolism	00362 Benzoate degradation [PATH:ko00362]	catC; muconolactone D-isomerase [EC:5.3.3.4]	K03464	Degradation of aromatic compounds	5.25e-05	2.2e-05	6.56e-05	5.98e-05	5.62e-05	7.43e-05	4.8e-05	0.000108	6.66e-05	7.55e-05	0.000105	4.11e-05	6.08e-05	6.59e-05	6.2e-05	7.85e-05	2.34e-05	5.81e-05	6.25e-05	5.44e-05	4.95e-05	6.26e-05	0.00012	0.000161	0	0	0	0	0	0.000216	0	0	0	2.27e-07	3.78e-07	0	0	0	0	1.66e-05	0	4.76e-06	5.16e-06	7.79e-06
Metabolism	Xenobiotics biodegradation and metabolism	00362 Benzoate degradation [PATH:ko00362]	CMLE; carboxy-cis,cis-muconate cyclase [EC:5.5.1.5]	K14334	Degradation of aromatic compounds	2e-05	8.86e-06	0.00011	6.97e-05	0.000127	5.09e-05	0.000192	6.01e-05	8.22e-05	1.3e-05	3.38e-05	0	1.06e-05	3.87e-06	3.97e-05	1.38e-05	4.07e-06	9.42e-06	0	1.29e-05	3.04e-06	1.01e-05	5.27e-06	0	5.06e-05	3.36e-05	0	3.14e-05	0.000344	0	0	0	0	0	0	0	0	0	0	0	0	0	2.58e-06	0
Metabolism	Xenobiotics biodegradation and metabolism	00361 Chlorocyclohexane and chlorobenzene degradation [PATH:ko00361]	E1.3.1.32; maleylacetate reductase [EC:1.3.1.32]	K00217	Degradation of aromatic compounds	0	1.95e-05	7.39e-06	1.32e-05	5.77e-06	0	1.57e-05	0.000108	9.01e-05	7.55e-05	9.02e-05	9.29e-05	7.66e-05	7.75e-05	4.22e-05	6.92e-05	7.43e-05	0.000101	7.46e-05	8.74e-05	8.08e-05	0.000118	0.000103	7.06e-05	0	5.04e-05	0	3.14e-05	0	0	0	7.37e-06	1.19e-05	8.46e-06	8.37e-06	1.71e-05	2.71e-06	5.64e-05	3.19e-05	2.22e-05	0	9.25e-05	0.000119	8.12e-05
Metabolism	Xenobiotics biodegradation and metabolism	00622 Xylene degradation [PATH:ko00622]	xylC; benzaldehyde dehydrogenase (NAD) [EC:1.2.1.28]	K00141	Degradation of aromatic compounds	8.27e-05	4.01e-05	0	4.23e-05	3.4e-05	2.8e-05	2.05e-05	8.65e-05	6.27e-05	8.33e-05	0.000101	8.86e-05	8.98e-05	0.000139	6.2e-05	9.23e-05	8.35e-05	9.32e-05	0.000127	0.000106	0.000132	0.000108	7.77e-05	0.000102	6.75e-05	0	0	0	0	0	0	2.42e-06	2.1e-06	2.36e-06	3.73e-06	2.85e-06	2.71e-06	0	3.19e-06	2.77e-06	7.46e-06	7.61e-05	5.42e-05	6.79e-05
Metabolism	Xenobiotics biodegradation and metabolism	00362 Benzoate degradation [PATH:ko00362]	pcaF; 3-oxoadipyl-CoA thiolase [EC:2.3.1.174]	K07823	Degradation of aromatic compounds	3.08e-05	1.88e-05	5.15e-05	2.8e-05	1.26e-05	2.69e-05	1.65e-05	2.4e-05	1.17e-05	1.56e-05	1.88e-05	2.38e-05	3.43e-05	3.49e-05	3.22e-05	2.08e-05	5.5e-05	4.61e-05	4.61e-05	3.72e-05	3.62e-05	5.75e-05	0.000223	0.000424	0	0	0	0	0	0	4.38e-05	1.14e-05	1.55e-05	1.56e-05	1.74e-05	4.56e-05	2.16e-05	2.26e-05	2.23e-05	6.1e-05	4.1e-05	7.29e-05	7.74e-05	7.45e-05
Metabolism	Xenobiotics biodegradation and metabolism	00627 Aminobenzoate degradation [PATH:ko00627]	E3.1.3.41; 4-nitrophenyl phosphatase [EC:3.1.3.41]	K01101	Degradation of aromatic compounds	1.03e-05	1.88e-05	4.26e-05	4.44e-05	3.84e-05	4.21e-05	7.34e-05	0.000236	0.000208	0.000128	0.00012	4.97e-05	4.75e-05	7.36e-05	7.93e-05	8.54e-05	5.29e-05	8.67e-05	4.5e-05	0.000155	5.09e-05	9.64e-05	9.75e-05	9.85e-06	0.000186	0.000269	0.000335	0.000377	0.000197	0	0	9.51e-06	4.58e-06	6.78e-06	1.59e-05	1.43e-05	8.12e-06	0	3.19e-06	8.88e-05	7.46e-06	2.54e-05	3.87e-05	1.45e-05
Metabolism	Xenobiotics biodegradation and metabolism	00361 Chlorocyclohexane and chlorobenzene degradation [PATH:ko00361]	E1.13.11.37; hydroxyquinol 1,2-dioxygenase [EC:1.13.11.37]	K04098	Degradation of aromatic compounds	4.22e-05	8.51e-05	6.8e-05	5.5e-05	8.05e-05	5.92e-05	5.78e-05	5.05e-05	3.52e-05	7.55e-05	5.63e-05	9.07e-05	0.000103	0.000136	2.73e-05	3.23e-05	5.09e-05	5.49e-05	7.24e-05	5.87e-05	6.82e-05	7.61e-05	5.93e-05	9.36e-05	1.69e-05	0.000202	0	3.14e-05	0	0	0	4.2e-06	5.32e-06	5.18e-06	8.97e-06	0	2.16e-05	3.95e-05	3.19e-06	3.61e-05	1.12e-05	9.2e-05	7.87e-05	8.79e-05
Metabolism	Xenobiotics biodegradation and metabolism	00362 Benzoate degradation [PATH:ko00362]	benB-xylY; benzoate/toluate 1,2-dioxygenase subunit beta [EC:1.14.12.10 1.14.12.-]	K05550	Degradation of aromatic compounds	0.000135	0.000128	0.000121	0.000146	0.000123	0.000128	7.04e-05	4.57e-05	4.31e-05	6.51e-05	6.39e-05	2.16e-05	2.91e-05	3.87e-05	5.7e-05	3.23e-05	3.46e-05	3.8e-05	2.63e-05	2.87e-05	2.66e-05	4.4e-05	0.000129	0.000144	0	0	0	0	0	0	0	1.86e-07	1.24e-07	1.36e-07	2.16e-07	0	0	0	3.19e-06	0	0	3.7e-06	2.58e-06	7.79e-06
Metabolism	Xenobiotics biodegradation and metabolism	00361 Chlorocyclohexane and chlorobenzene degradation [PATH:ko00361]	catB; muconate cycloisomerase [EC:5.5.1.1]	K01856	Degradation of aromatic compounds	4.28e-05	5.25e-05	5.45e-05	5.27e-05	5.04e-05	4.92e-05	4.35e-05	0.000132	0.000117	0.000151	0.000143	7.78e-05	6.34e-05	9.68e-05	4.71e-05	6.46e-05	9.57e-05	0.000109	0.000101	0.000115	7.36e-05	0.000134	0.000354	0.000493	0	0	0	0	0	7.2e-05	0	4.2e-06	7.3e-06	9.05e-06	1.24e-05	3.99e-05	2.71e-06	6.21e-05	5.74e-05	3.05e-05	5.59e-05	4.44e-05	1.94e-05	2.34e-05
Metabolism	Xenobiotics biodegradation and metabolism	00627 Aminobenzoate degradation [PATH:ko00627]	vanB; vanillate monooxygenase [EC:1.14.13.82]	K03863	Degradation of aromatic compounds	9.93e-05	7.16e-05	4.14e-05	6.55e-05	5.47e-05	6.1e-05	3.99e-05	2.16e-05	5.09e-05	4.42e-05	9.39e-05	7.99e-05	4.49e-05	8.52e-05	4.96e-05	9e-05	0.000113	9.39e-05	8.99e-05	9.45e-05	0.000128	5.41e-05	0.000325	0.000611	0	0	0	0	4.92e-05	7.2e-05	0	2.24e-06	3.84e-06	2.68e-06	3.46e-06	1.43e-05	8.12e-06	1.13e-05	2.55e-05	2.5e-05	3.73e-06	6.98e-05	6.19e-05	7.01e-05
Metabolism	Xenobiotics biodegradation and metabolism	00361 Chlorocyclohexane and chlorobenzene degradation [PATH:ko00361]	bphC; biphenyl-2,3-diol 1,2-dioxygenase [EC:1.13.11.39]	K00462	Degradation of aromatic compounds	1.31e-05	2.62e-05	2.54e-05	3.18e-05	1.41e-05	1.54e-05	2e-05	3.12e-05	1.96e-05	5.72e-05	4.13e-05	3.02e-05	2.38e-05	2.32e-05	1.24e-05	3.23e-05	2.24e-05	2.47e-05	2.3e-05	2.44e-05	2.5e-05	3.38e-05	2.63e-05	8.87e-05	0	1.68e-05	0	0	0	0	0	5.63e-05	5.4e-05	4.88e-05	4.8e-05	4.56e-05	0.000133	5.08e-05	5.42e-05	7.49e-05	0.000119	3.49e-05	4.26e-05	4.67e-05
Metabolism	Xenobiotics biodegradation and metabolism	00362 Benzoate degradation [PATH:ko00362]	ligI; 2-pyrone-4,6-dicarboxylate lactonase [EC:3.1.1.57]	K10221	Degradation of aromatic compounds	8.16e-05	6.17e-05	5.42e-05	5.67e-05	5.68e-05	7.1e-05	3.78e-05	2.64e-05	3.92e-06	1.3e-05	1.88e-05	8.64e-06	1.32e-05	2.32e-05	2.73e-05	1.38e-05	4.07e-05	2.47e-05	3.84e-05	3.72e-05	3.39e-05	2.87e-05	5.27e-05	2.79e-05	0	0	0	3.14e-05	0	0	0	2.06e-05	3.11e-05	2.88e-05	3.21e-05	3.99e-05	5.68e-05	5.64e-05	9.88e-05	9.16e-05	2.98e-05	8.88e-05	9.42e-05	0.000111
Metabolism	Xenobiotics biodegradation and metabolism	00362 Benzoate degradation [PATH:ko00362]	benC-xylZ; benzoate/toluate 1,2-dioxygenase electron transfer component	K05784	Degradation of aromatic compounds	0.000173	6.2e-05	0.000102	7.99e-05	0.000114	7.7e-05	5.45e-05	0.000108	0.000129	0.000172	0.000162	0.000158	0.000129	0.00012	7.93e-05	7.62e-05	9.77e-05	9.42e-05	0.00011	9.74e-05	9.79e-05	0.000142	0.000292	0.000346	0	0	0	0	0	0	0	1.31e-06	1.73e-06	1.05e-06	9.72e-07	0	0	0	3.19e-06	1.66e-05	0	1.59e-05	1.42e-05	1.67e-05
Metabolism	Xenobiotics biodegradation and metabolism	00361 Chlorocyclohexane and chlorobenzene degradation [PATH:ko00361]	E1.14.13.50; pentachlorophenol monooxygenase [EC:1.14.13.50]	K03391	Degradation of aromatic compounds	0.000104	8.97e-05	6.14e-05	8.7e-05	7.71e-05	7.45e-05	8.12e-05	4.57e-05	5.09e-05	0.000114	0.000124	0.000292	0.000304	0.000205	0.000188	0.000233	4.17e-05	6.66e-05	0.000106	5.44e-05	0.0001	5.07e-05	2.5e-05	0.0001	0	0	2.39e-05	0	2.46e-05	0	0	2.8e-07	2.48e-07	4.55e-07	3.78e-07	0	0	0	3.19e-06	0	0	9.72e-05	8.65e-05	6.45e-05
Metabolism	Xenobiotics biodegradation and metabolism	00362 Benzoate degradation [PATH:ko00362]	badH; 2-hydroxycyclohexanecarboxyl-CoA dehydrogenase [EC:1.1.1.-]	K07535	Degradation of aromatic compounds	6.73e-05	4.36e-05	3.62e-05	4.27e-05	1.96e-05	2.47e-05	3.05e-05	7.69e-05	6.27e-05	0.000148	0.000128	0.000156	0.000151	0.000186	0.000126	0.000152	6.72e-05	0.000127	9.65e-05	0.00011	0.000126	0.000108	7.9e-05	5.42e-05	0	0	0	0	0	0	4.38e-05	1.07e-05	1.96e-05	1.3e-05	1.35e-05	2.85e-05	3.79e-05	0.000119	3.19e-05	2.77e-05	2.61e-05	0.000142	0.000123	0.000128
Metabolism	Xenobiotics biodegradation and metabolism	00362 Benzoate degradation [PATH:ko00362]	pcaG; protocatechuate 3,4-dioxygenase, alpha subunit [EC:1.13.11.3]	K00448	Degradation of aromatic compounds	1.03e-05	4.18e-05	4.46e-05	3.7e-05	3.89e-05	6.74e-05	3.64e-05	0.000103	0.000114	0.000177	0.000124	0.000138	0.000145	0.000128	8.93e-05	0.000171	0.000167	0.000159	0.000178	0.000123	0.000207	0.000161	0.000352	0.000509	0	0	0	0	0	0	0	5.04e-06	6.31e-06	6.28e-06	5.83e-06	5.71e-05	5.41e-06	4.51e-05	4.46e-05	2.77e-05	0	0.000119	0.00012	0.000116
Metabolism	Xenobiotics biodegradation and metabolism	00361 Chlorocyclohexane and chlorobenzene degradation [PATH:ko00361]	tfdB; 2,4-dichlorophenol 6-monooxygenase [EC:1.14.13.20]	K10676	Degradation of aromatic compounds	6.96e-05	7.45e-05	5.92e-05	0.000136	6.64e-05	0.000103	9.72e-05	0.000108	0.000133	0.000107	0.000124	9.29e-05	7.4e-05	0.00017	4.71e-05	7.39e-05	8.14e-05	9.81e-05	9.65e-05	0.000105	0.000102	0.00011	0.000105	2.63e-05	0	0	0	3.14e-05	0	0	0	1.46e-05	2.39e-05	1.25e-05	2.33e-05	4.56e-05	5.41e-06	0.000119	3.83e-05	2.77e-05	0	5.13e-05	5.29e-05	5.34e-05
Metabolism	Xenobiotics biodegradation and metabolism	00362 Benzoate degradation [PATH:ko00362]	DHBD; 2,3-dihydroxybenzoate decarboxylase [EC:4.1.1.46]	K14333	Degradation of aromatic compounds	7.19e-05	7.98e-05	0.00011	9.14e-05	0.000192	0.000104	0.000208	0.000125	0.000164	6.51e-05	0.000105	3.46e-05	3.43e-05	5.42e-05	2.73e-05	2.31e-05	1.73e-05	4.55e-05	3.51e-05	3.29e-05	2.92e-05	3.38e-05	1.05e-05	4.93e-06	1.69e-05	0.000202	4.78e-05	0.000251	0.000172	0	0	1.04e-05	1.58e-05	1.04e-05	1.18e-05	8.56e-06	8.12e-06	1.69e-05	9.56e-06	1.66e-05	1.49e-05	0.000123	0.000121	0.000156
Metabolism	Xenobiotics biodegradation and metabolism	00362 Benzoate degradation [PATH:ko00362]	badA; benzoate-CoA ligase [EC:6.2.1.25]	K04110	Degradation of aromatic compounds	0	1.95e-05	4.19e-06	0	4.91e-06	1.83e-05	9.99e-06	3.12e-05	4.7e-05	2.6e-05	3.38e-05	6.91e-05	6.08e-05	6.97e-05	8.68e-05	8.31e-05	8.14e-05	7.89e-05	7.02e-05	6.16e-05	0.000115	6.09e-05	5.53e-05	1.97e-05	0	0	0	0	0	7.2e-05	0	3.59e-05	5.98e-05	5.65e-05	7.07e-05	5.13e-05	5.41e-06	0.000135	4.46e-05	1.94e-05	1.86e-05	0.000224	0.000169	0.000176
Metabolism	Xenobiotics biodegradation and metabolism	00627 Aminobenzoate degradation [PATH:ko00627]	mdlC; benzoylformate decarboxylase [EC:4.1.1.7]	K01576	Degradation of aromatic compounds	5.99e-05	1.84e-05	3.72e-05	3.93e-05	3.03e-05	3.16e-05	5.88e-05	6.97e-05	0.000117	0.000164	0.000199	0.000238	0.000243	0.000194	0.000122	0.000173	0.000132	0.000144	0.00018	9.17e-05	0.000165	0.000127	0.000458	0.000722	0	0	0	0	0	0	0	1.3e-05	2.56e-05	1.3e-05	1.56e-05	2.85e-05	1.35e-05	2.82e-05	6.38e-06	5.27e-05	1.12e-05	0.000284	0.000236	0.000234
Metabolism	Xenobiotics biodegradation and metabolism	00362 Benzoate degradation [PATH:ko00362]	ligB; protocatechuate 4,5-dioxygenase, beta chain [EC:1.13.11.8]	K04101	Degradation of aromatic compounds	0.000225	0.000174	0.000136	0.000149	0.000139	0.000131	7.18e-05	6.97e-05	4.7e-05	4.68e-05	5.26e-05	7.35e-05	5.81e-05	7.75e-05	4.96e-05	6e-05	8.25e-05	5.98e-05	0.000104	6.16e-05	8.78e-05	5.75e-05	9.22e-05	4.93e-05	0	0	0	0	0	0	0	2.15e-05	3.62e-05	3.53e-05	3.22e-05	4.28e-05	9.47e-05	7.9e-05	0.000105	0.000142	8.2e-05	0.000104	8.52e-05	0.000111
Metabolism	Xenobiotics biodegradation and metabolism	00362 Benzoate degradation [PATH:ko00362]	pcaD; 3-oxoadipate enol-lactonase [EC:3.1.1.24]	K01055	Degradation of aromatic compounds	9.13e-06	1.06e-05	1.16e-05	9e-06	2.24e-05	1.6e-05	2.08e-05	0.00012	0.000153	0.000154	0.000233	0.0003	0.000269	0.000213	0.000188	0.000289	0.00027	0.000202	0.000208	0.000185	0.00031	0.000167	0.000503	0.000755	0	0	0	0	4.92e-05	0	0	2e-05	3.07e-05	3.88e-05	4.03e-05	0.000194	8.93e-05	0.000119	0.000163	0.000286	0.000194	0.000197	0.000185	0.000129
Metabolism	Xenobiotics biodegradation and metabolism	00361 Chlorocyclohexane and chlorobenzene degradation [PATH:ko00361]	dmpB; catechol 2,3-dioxygenase [EC:1.13.11.2]	K00446	Degradation of aromatic compounds	0.000192	0.000217	0.000166	0.000172	0.000182	0.000186	0.000135	0.000185	0.000188	0.000154	0.000214	0.000115	0.000127	0.000116	0.000136	0.000138	0.000152	0.000179	0.000151	0.000158	0.000172	0.000159	0.000174	0.000151	0	0	0	0	2.46e-05	0	0	1.26e-05	1.65e-05	1.31e-05	1.35e-05	0.000131	4.6e-05	9.59e-05	8.61e-05	0.000125	5.97e-05	0.000125	0.000139	0.000125
Metabolism	Xenobiotics biodegradation and metabolism	00791 Atrazine degradation [PATH:ko00791]	atzD; cyanuric acid amidohydrolase [EC:3.5.2.15]	K03383	Degradation of aromatic compounds	0.000497	0.000366	0.000233	0.000341	0.000218	0.000233	0.00014	4.33e-05	9.4e-05	0.000133	0.000128	0.000264	0.000195	0.000236	0.000149	0.000173	7.84e-05	9.06e-05	9.98e-05	7.59e-05	0.00016	6.76e-05	5.14e-05	2.63e-05	0	0	0	0	0	0	0	2.52e-06	9.29e-06	1.68e-06	3.13e-06	0	0	0	6.38e-06	1.11e-05	0	7.03e-05	6.32e-05	4.9e-05
Metabolism	Xenobiotics biodegradation and metabolism	00362 Benzoate degradation [PATH:ko00362]	pcaB; 3-carboxy-cis,cis-muconate cycloisomerase [EC:5.5.1.2]	K01857	Degradation of aromatic compounds	4.85e-05	4.72e-05	4.51e-05	1.93e-05	5.06e-05	6.01e-05	4.05e-05	0.000159	0.000247	0.000247	0.000285	0.000335	0.000269	0.000263	0.000213	0.000217	0.000314	0.000259	0.000317	0.000282	0.000382	0.000211	0.00054	0.000722	0	0.000134	0	9.41e-05	2.46e-05	0	0	1.89e-05	3.18e-05	2.76e-05	3.1e-05	0.000131	5.68e-05	6.21e-05	7.33e-05	3.61e-05	8.2e-05	0.000311	0.000237	0.000234
Metabolism	Xenobiotics biodegradation and metabolism	00362 Benzoate degradation [PATH:ko00362]	ligJ; 4-oxalmesaconate hydratase [EC:4.2.1.83]	K10220	Degradation of aromatic compounds	0.000191	0.00026	0.000144	0.00021	0.000173	0.000158	9.88e-05	5.53e-05	5.09e-05	8.59e-05	6.39e-05	9.72e-05	6.87e-05	0.000124	5.46e-05	7.85e-05	0.000143	0.000104	0.000145	0.00011	0.000126	8.12e-05	6.19e-05	5.09e-05	0	0	0	0	0	0	0	2.07e-05	3.59e-05	2.51e-05	2.84e-05	5.42e-05	0.00017	6.77e-05	8.61e-05	0.000233	6.34e-05	0.000268	0.000329	0.000299
Metabolism	Xenobiotics biodegradation and metabolism	00362 Benzoate degradation [PATH:ko00362]	pcaI; 3-oxoadipate CoA-transferase, alpha subunit [EC:2.8.3.6]	K01031	Degradation of aromatic compounds	0.000282	0.000266	0.000284	0.000326	0.000248	0.000312	0.000147	0.000103	0.000102	4.68e-05	8.64e-05	0.000104	8.98e-05	9.68e-05	0.000139	0.000111	0.000123	0.000119	9.98e-05	0.000145	0.000129	0.000103	0.000129	0.000159	1.69e-05	0	0	0	0	7.2e-05	0	1.64e-05	2.41e-05	1.77e-05	2.25e-05	3.99e-05	1.08e-05	2.82e-05	2.87e-05	1.39e-05	4.1e-05	8.14e-05	9.03e-05	7.34e-05
Metabolism	Xenobiotics biodegradation and metabolism	00633 Nitrotoluene degradation [PATH:ko00633]	nemA; N-ethylmaleimide reductase [EC:1.-.-.-]	K10680	Degradation of aromatic compounds	0.000155	0.000128	0.000187	0.00014	0.000118	0.000149	0.000199	0.000197	0.000239	0.000195	0.000244	0.00024	0.000261	0.000248	0.000352	0.000265	0.000375	0.000258	0.000231	0.000239	0.000273	0.000213	0.000574	0.000929	0.000624	0.00183116	0.000932	0.000471	9.83e-05	0	0.000395	1.2e-05	1.58e-05	1.85e-05	1.8e-05	4.85e-05	4.87e-05	0.000152	0.000185	9.43e-05	5.97e-05	0.000144	0.000132	0.000147
Metabolism	Xenobiotics biodegradation and metabolism	00362 Benzoate degradation [PATH:ko00362]	pcaJ; 3-oxoadipate CoA-transferase, beta subunit [EC:2.8.3.6]	K01032	Degradation of aromatic compounds	0.000376	0.000349	0.000273	0.000334	0.00025	0.000318	0.000196	7.21e-05	0.000102	5.2e-05	0.000131	0.000104	9.77e-05	0.000147	0.000109	9.93e-05	0.000133	0.000137	0.000131	0.000148	0.000146	0.00014	0.000125	0.00014	0	0	0	3.14e-05	0	0	0.000175	1.86e-05	2.65e-05	2.06e-05	2.74e-05	5.99e-05	4.87e-05	7.9e-05	6.06e-05	6.94e-05	6.34e-05	7.08e-05	7.61e-05	5.12e-05
Metabolism	Xenobiotics biodegradation and metabolism	00930 Caprolactam degradation [PATH:ko00930]	DCAA; acyl-CoA dehydrogenase [EC:1.3.99.-]	K06446	Degradation of aromatic compounds	0.000197	0.000173	0.000101	0.000166	0.000145	0.00018	8.99e-05	0.000147	8.22e-05	0.000169	0.000116	0.000162	0.000103	0.000108	0.000198	0.000162	0.000163	0.000184	0.000226	0.000176	0.000181	0.000191	0.000281	0.000366	0	0	0	0.000126	0.000123	0	8.77e-05	4.19e-05	7.23e-05	5.28e-05	6.13e-05	8.84e-05	8.12e-05	0.000164	5.42e-05	0.000164	8.57e-05	0.000188	0.000173	0.000219
Metabolism	Xenobiotics biodegradation and metabolism	00627 Aminobenzoate degradation [PATH:ko00627]	vanA; vanillate monooxygenase [EC:1.14.13.82]	K03862	Degradation of aromatic compounds	0.000415	0.00036	0.000241	0.000294	0.000236	0.000284	0.000182	5.77e-05	8.22e-05	0.000107	0.000184	0.000151	0.000158	0.000209	9.42e-05	0.00015	0.000195	0.000121	0.000159	0.000102	0.000184	9.47e-05	0.000234	0.000581	0	0	0	6.28e-05	0	0	4.38e-05	1.68e-05	3.55e-05	2.32e-05	2.37e-05	5.42e-05	3.79e-05	7.9e-05	0.000137	0.000128	3.73e-05	0.000154	0.000148	0.000161
Metabolism	Xenobiotics biodegradation and metabolism	00633 Nitrotoluene degradation [PATH:ko00633]	E1.12.99.6L; hydrogenase large subunit [EC:1.12.99.6]	K06281	Degradation of aromatic compounds	0.000346	0.000285	0.00022	0.000282	0.0002	0.000167	0.000148	8.65e-05	0.000133	0.000213	0.00018	0.000486	0.000618	0.000287	0.000555	0.000612	0.000131	0.000165	0.000179	0.000119	0.000186	7.27e-05	4.35e-05	3.28e-05	0	0	0	0	0	0	0	4.66e-06	1.08e-05	4.5e-06	4.21e-06	5.99e-05	0	9.59e-05	0.000245	8.32e-06	3.73e-06	0.000366	0.000388	0.000281
Metabolism	Xenobiotics biodegradation and metabolism	00361 Chlorocyclohexane and chlorobenzene degradation [PATH:ko00361]	catA; catechol 1,2-dioxygenase [EC:1.13.11.1]	K03381	Degradation of aromatic compounds	0.000277	0.0004	0.000245	0.000307	0.000361	0.000335	0.000273	0.000372	0.000419	0.000297	0.000428	0.000153	0.000166	0.000128	0.000163653	0.000199	0.000151	0.000162	0.000145	0.000166	0.000164	0.000201	0.000291	0.000433	0.000101	0	2.39e-05	0.000251	0.000197	0	8.77e-05	1.68e-05	2.4e-05	2.59e-05	2.78e-05	3.71e-05	8.66e-05	6.21e-05	6.06e-05	7.21e-05	4.1e-05	0.000123	9.29e-05	9.23e-05
Metabolism	Xenobiotics biodegradation and metabolism	00362 Benzoate degradation [PATH:ko00362]	pcaC; 4-carboxymuconolactone decarboxylase [EC:4.1.1.44]	K01607	Degradation of aromatic compounds	0.000154	0.000129	0.000132	0.000128	0.000125	0.000102	0.0001	0.00037	0.000333	0.000343	0.000349	0.000348	0.000322	0.000329	0.000347	0.000379	0.000322	0.000273	0.000268	0.000222	0.000334	0.000221	0.000315	0.000478	6.75e-05	0	0	0.000251	7.37e-05	0	0	4.3e-05	7.97e-05	6.37e-05	8.35e-05	0.000225	0.000114	0.000192	0.000169	0.00018	0.00016	0.000404	0.000394	0.000357
Metabolism	Xenobiotics biodegradation and metabolism	00361 Chlorocyclohexane and chlorobenzene degradation [PATH:ko00361]	E1.14.13.7; phenol 2-monooxygenase [EC:1.14.13.7]	K03380	Degradation of aromatic compounds	0.00022	0.000136	0.000382	0.000286	0.000348	0.000305	0.000317	0.000731	0.000685	0.0005	0.000485	0.000216	0.000203	0.000275	0.000399	0.000397	0.000244	0.000386	0.000298	0.000309	0.000275	0.000418	0.000425	0.000192	0.000624	0.00223435	0.000383	0.000847	0.000492	0	8.77e-05	1.23e-05	2.2e-05	1.88e-05	1.87e-05	0.000285	0.000127	0.000192	0.000153	0.000153	0.000123	0.000104	9.55e-05	7.23e-05
Metabolism	Xenobiotics biodegradation and metabolism	00362 Benzoate degradation [PATH:ko00362]	pobA; p-hydroxybenzoate 3-monooxygenase [EC:1.14.13.2]	K00481	Degradation of aromatic compounds	0.000284	0.000239	0.000189	0.000316	0.000284	0.000158	0.000252	0.000223	0.000349	0.000432	0.000357	0.000529	0.00047	0.000504	0.000379	0.000358	0.000372	0.000379	0.000397	0.000299	0.00049	0.000402	0.000639	0.000634	0	0	0	3.14e-05	0	0	0	6.33e-05	9.58e-05	7.79e-05	8.64e-05	0.000262	0.000181	0.00035	0.000201	0.000239	9.69e-05	0.000457	0.00047	0.000419
Metabolism	Xenobiotics biodegradation and metabolism	00362 Benzoate degradation [PATH:ko00362]	pcaH; protocatechuate 3,4-dioxygenase, beta subunit [EC:1.13.11.3]	K00449	Degradation of aromatic compounds	0.000655	0.000561	0.000439	0.000519	0.00044	0.000489	0.000299	0.000132	0.000211	0.000247	0.000225	0.000292	0.000328	0.000291	0.000295	0.000325	0.000331	0.000237	0.000273	0.000229	0.000304	0.000194	0.000283	0.000325	0	0	0	0	0	7.2e-05	0	2.56e-05	3.63e-05	3.18e-05	3.26e-05	0.000197	2.16e-05	9.59e-05	0.000108	7.77e-05	4.47e-05	0.000346	0.000253	0.000312
Metabolism	Xenobiotics biodegradation and metabolism	00791 Atrazine degradation [PATH:ko00791]	atzB; hydroxyatrazine ethylaminohydrolase [EC:3.5.99.3]	K03382	Degradation of aromatic compounds	0.000265	0.000264	0.000213	0.000286	0.000181	0.000221	0.000196	0.000142	0.000172	0.000328	0.00021	0.000452	0.000365	0.000488	0.000154	0.000205	0.000211	0.000213	0.000265	0.000231	0.000328	0.000232	0.000404	0.000647	0	0	0	0	2.46e-05	0.00036	8.77e-05	9.92e-05	0.000165	0.000187	0.000191	0.000337	0.000298	0.000463	0.000421	0.000649	0.00041	0.000273	0.000308	0.000303
Metabolism	Xenobiotics biodegradation and metabolism	00621 Dioxin degradation [PATH:ko00621]	E1.14.13.1; salicylate hydroxylase [EC:1.14.13.1]	K00480	Degradation of aromatic compounds	6.62e-05	0.000123	0.000143	0.000144	0.000268	0.000178	0.000216	0.000954	0.00109641	0.000565	0.000856	0.000283	0.000217	0.000314	0.000461	0.000325	0.000407	0.000344	0.000287	0.000312	0.000338	0.000306	0.000396	0.000571	0.000759	0.00115918	0.000287	0.000502	0.00108145	0.000216	0.000132	0.00016	0.000146	0.00023	0.000261	0.000277	0.000238	0.000214	0.00015	0.000216	0.000205	0.000347	0.000292	0.000317
Metabolism	Xenobiotics biodegradation and metabolism	00627 Aminobenzoate degradation [PATH:ko00627]	E1.14.13.40; anthraniloyl-CoA monooxygenase [EC:1.14.13.40]	K09461	Degradation of aromatic compounds	0.000177	0.000282	0.000237	0.000274	0.000262	0.000291	0.000155	0.00019	0.00018	0.000307	0.000192	0.000456	0.000491	0.000407	0.000387	0.0003	0.000617	0.000458	0.000471	0.000374	0.000546	0.00036	0.000173	0.000126	0	0	0	3.14e-05	4.92e-05	0	0	5.91e-05	0.000111	0.000117	0.000154	0.000128	0.000165	0.00035	9.56e-05	0.000172	7.83e-05	0.00061	0.00056	0.000699
Metabolism	Xenobiotics biodegradation and metabolism	00361 Chlorocyclohexane and chlorobenzene degradation [PATH:ko00361]	E3.1.1.45; carboxymethylenebutenolidase [EC:3.1.1.45]	K01061	Degradation of aromatic compounds	0.000159	0.000153	0.000243	0.000158	0.000229	0.000177	0.000336	0.000524	0.000525	0.000643	0.000751	0.000998	0.000755	0.00091	0.000868	0.000725	0.000694	0.000557	0.000633	0.000493	0.000697	0.000593	0.000548	0.000851	0.000337	0.000319	0.000645	0.000314	0.000246	7.2e-05	8.77e-05	0.000194	0.000234	0.00017	0.000141	0.000174	0.000203	0.000598	0.00036	0.000208	0.00016	0.00105757	0.00104404	0.00105916
Metabolism	Energy metabolism	00920 Sulfur metabolism [PATH:ko00920]	PAPSS; 3'-phosphoadenosine 5'-phosphosulfate synthase [EC:2.7.7.4 2.7.1.25]	K13811	Assimilatory sulfate reduction	1.71e-06	3.55e-06	1.97e-06	4.6e-06	2.14e-06	1.27e-06	3.51e-06	2.16e-05	7.83e-06	0	7.51e-06	6.48e-06	1.06e-05	1.55e-05	1.24e-05	1.38e-05	1.73e-05	1.14e-05	9.87e-06	1.86e-05	5.37e-06	1.69e-05	1.32e-06	0	1.69e-05	1.68e-05	0	0	0	0.000144	0.000132	1.32e-05	7.68e-06	4.78e-06	7.4e-06	2.28e-05	0	4.51e-05	9.56e-06	2.77e-05	2.61e-05	2.43e-05	2.06e-05	8.9e-06
Metabolism	Energy metabolism	00920 Sulfur metabolism [PATH:ko00920]	cysJ; sulfite reductase (NADPH) flavoprotein alpha-component [EC:1.8.1.2]	K00380	Assimilatory sulfate reduction	0.000118	0.00014	0.000328	0.000221	0.000356	0.000318	0.000462	0.000435	0.000458	0.000255	0.000364	0.000125	0.000103	0.000139	0.00028	0.000235	0.000382	0.000283	0.000299	0.000403984	0.000233	0.000321	0.000713	0.00105747	0.00113042	0.000588	0.000335	0.000282	0.000492	0.000288	0.000263	5.64e-05	6.47e-05	9.65e-05	0.000136	4.56e-05	0.000108	0.000226	0.000277	0.00018	0.000101	0.000317	0.000246	0.000286
Metabolism	Energy metabolism	00920 Sulfur metabolism [PATH:ko00920]	cysN; sulfate adenylyltransferase subunit 1 [EC:2.7.7.4]	K00956	Assimilatory sulfate reduction	0.000524	0.000514	0.000461	0.000417	0.000382	0.000432	0.000346	0.000346	0.000333	0.000346	0.000334	0.000404	0.000465	0.000445	0.000471	0.000531	0.000449	0.000476	0.000522	0.000453	0.000535	0.000453	0.000337	0.000328	0	0	0	9.41e-05	0	0.00115191	0.000263	0.000125	0.00012	0.000115	0.000108	0.000784	0.000262	0.000626	0.00087	0.000325	0.000414	0.000479	0.000479	0.000457
Metabolism	Energy metabolism	00920 Sulfur metabolism [PATH:ko00920]	sir; sulfite reductase (ferredoxin) [EC:1.8.7.1]	K00392	Assimilatory sulfate reduction	0.000113	6.84e-05	5.15e-05	3.95e-05	4.55e-05	3.81e-05	0.000341	4.81e-05	9.4e-05	0.000138	0.000101	0.000119	0.000114	7.75e-05	0.000119	8.31e-05	9.47e-05	7.6e-05	6.03e-05	7.31e-05	7.94e-05	4.73e-05	2.9e-05	6.57e-06	0	0	0	0	2.46e-05	7.2e-05	0.000438	0.000947	0.000987	0.000458	0.000309	0.000117	6.49e-05	0.00013	0.000188	0.00033	0.000119	9.09e-05	5.68e-05	7.01e-05
Metabolism	Energy metabolism	00920 Sulfur metabolism [PATH:ko00920]	cysNC; bifunctional enzyme CysN/CysC [EC:2.7.7.4 2.7.1.25]	K00955	Assimilatory sulfate reduction	0.000711	0.000593	0.000488	0.000553	0.000478	0.00057	0.000321	0.000209	0.000247	0.000372	0.000327	0.000482	0.000505	0.000445	0.000469	0.000503	0.000512	0.000536	0.000578	0.000491	0.00059	0.000499	0.000452	0.000565	0	1.68e-05	0	6.28e-05	0	0.000792	0.000658	0.000185	0.000201	0.00021	0.000236	0.000505	0.000714	0.000587	0.000488	0.00061	0.000604	0.000704	0.000716	0.00079
Metabolism	Energy metabolism	00920 Sulfur metabolism [PATH:ko00920]	cysC; adenylylsulfate kinase [EC:2.7.1.25]	K00860	Assimilatory sulfate reduction	9.81e-05	9.43e-05	0.000131	9.67e-05	0.000132	0.0001	0.000157	0.000163	0.00018	0.000237	0.000274	0.000367	0.000388	0.00026	0.000426	0.000284	0.000209	0.000192	0.000214	0.000201992	0.000213	0.000161	0.000183	0.000261	0.000135	0.000538	0.000526	0.000314	0.000197	0.000144	8.77e-05	0.000777	0.000765	0.000554	0.000491	0.000425	0.000308	0.000474	0.000446	0.000394	0.000406	0.000319	0.000346	0.000256
Metabolism	Energy metabolism	00920 Sulfur metabolism [PATH:ko00920]	cysI; sulfite reductase (NADPH) hemoprotein beta-component [EC:1.8.1.2]	K00381	Assimilatory sulfate reduction	0.00058	0.000799	0.00117666	0.000841	0.00110858	0.00105764	0.0012507	0.0005	0.000807	0.000468	0.000616	0.000348	0.000396	0.000387	0.000679	0.000628	0.000686	0.000511	0.000519	0.00059	0.000505	0.000467	0.000859	0.00122003	0.00254766	0.00136077	0.00131485	0.000471	0.000246	0.000144	0.000833	7.65e-05	8.65e-05	8.99e-05	9.74e-05	0.000476	0.000368	0.000683	0.000877	0.00066	0.000529	0.000795	0.000829	0.000777
Metabolism	Energy metabolism	00920 Sulfur metabolism [PATH:ko00920]	cysD; sulfate adenylyltransferase subunit 2 [EC:2.7.7.4]	K00957	Assimilatory sulfate reduction	0.00208044	0.00195067	0.00151187	0.00160225	0.00141482	0.00150926	0.000978	0.000358	0.000395	0.000476	0.000443	0.000663	0.000671	0.000678	0.000717	0.000706	0.000635	0.000566	0.000744	0.000625	0.000693	0.00061	0.00047	0.00046	0	0	0	6.28e-05	4.92e-05	0.000288	0.000701	0.000235	0.000236	0.000238	0.000256	0.000944	0.000869	0.000762	0.000819	0.000569	0.000652	0.000851	0.000803	0.000812
Metabolism	Energy metabolism	00920 Sulfur metabolism [PATH:ko00920]	aprB; adenylylsulfate reductase, subunit B [EC:1.8.99.2]	K00395	Dissimilatory sulfate reduction	3.99e-06	6.74e-06	7.39e-06	3.14e-06	7.9e-06	2.91e-06	2.43e-06	0	0	5.2e-06	1.13e-05	2.16e-06	0	0	0	0	2.04e-06	1.3e-06	3.29e-06	0	7.01e-07	1.69e-06	0	0	0	0	0	0	0	0	0	0.000174	0.000175	0.00023	0.000257	4.85e-05	0.000184	0.000124	7.01e-05	0.000153	0.00016	1.37e-05	1.42e-05	1.67e-05
Metabolism	Energy metabolism	00920 Sulfur metabolism [PATH:ko00920]	aprA; adenylylsulfate reductase, subunit A [EC:1.8.99.2]	K00394	Dissimilatory sulfate reduction	2e-05	2.87e-05	2.64e-05	1.84e-05	2.93e-05	1.69e-05	2.43e-05	1.92e-05	0	1.04e-05	2.25e-05	2.16e-06	0	0	0	2.31e-06	7.13e-06	8.77e-06	1.65e-05	1.86e-05	5.84e-06	8.45e-06	1.32e-05	1.64e-06	0	0	0	0	0	0	4.38e-05	0.00075	0.000782	0.000994	0.00112176	0.000174	0.00089	0.000322	0.000245	0.00061	0.000731	4.76e-05	6.32e-05	6.23e-05
Environmental Information Processing	Signal transduction	02020 Two-component system [PATH:ko02020]	ttrC; tetrathionate reductase subunit C	K08359	Tetrathionate oxidation	5.7e-07	0	0	4.19e-07	2.78e-06	1.27e-06	1.08e-06	4.81e-06	3.92e-06	5.2e-06	0	0	0	0	0	0	1.02e-06	9.74e-07	2.19e-06	0	2.34e-07	3.38e-06	2.37e-05	8.21e-06	0	0	0	0	0	0	0	2.8e-07	2.48e-07	0	1.08e-07	0	0	0	6.38e-06	0	0	0	0	0
Environmental Information Processing	Signal transduction	02020 Two-component system [PATH:ko02020]	ttrB; tetrathionate reductase subunit B	K08358	Tetrathionate oxidation	1.71e-06	5.32e-06	1.73e-06	1.05e-06	3.84e-06	2e-06	2.97e-06	0	0	2.6e-06	3.76e-06	0	0	0	0	0	4.07e-06	3.9e-06	3.29e-06	7.16e-06	2.57e-06	1.18e-05	2.11e-05	6.57e-06	0	0	0	0	0	0	4.38e-05	1.4e-06	9.9e-07	6.82e-07	1.35e-06	2.85e-06	0	5.08e-05	4.14e-05	0	0	4.76e-06	1.03e-05	3.34e-06
Environmental Information Processing	Signal transduction	02020 Two-component system [PATH:ko02020]	ttrA; tetrathionate reductase subunit A	K08357	Tetrathionate oxidation	8.56e-06	3.55e-07	4.44e-06	1.05e-06	4.27e-06	3.27e-06	3.78e-06	5.05e-05	3.92e-05	4.94e-05	1.13e-05	0	0	0	4.96e-06	0	7.13e-06	7.79e-06	1.54e-05	1.29e-05	5.14e-06	1.86e-05	6.98e-05	3.78e-05	0	0	0	0	0	0	0	2.8e-07	7.43e-07	6.82e-07	7.02e-07	0	0	0	2.23e-05	0	0	0	2.58e-06	1.11e-06
Environmental Information Processing	Signal transduction	02020 Two-component system [PATH:ko02020]	evgS, bvgS; two-component system, NarL family, sensor histidine kinase EvgS [EC:2.7.13.3]	K07679	Acid stress	0	1.56e-05	2.29e-05	3.56e-06	4.7e-06	1.63e-06	2.43e-06	2.64e-05	2.74e-05	1.82e-05	1.13e-05	1.08e-05	7.92e-06	7.75e-06	1.49e-05	2.77e-05	2.14e-05	2.6e-05	2.08e-05	1.72e-05	2.29e-05	2.2e-05	0.000539	0.000805	0	0	0	6.28e-05	0.000123	7.2e-05	0	7.46e-07	6.19e-07	8.19e-07	5.94e-07	2.85e-06	1.08e-05	1.69e-05	2.55e-05	1.11e-05	3.73e-06	4.28e-05	4.39e-05	2.78e-05
Environmental Information Processing	Signal transduction	02020 Two-component system [PATH:ko02020]	cusS, copS, silS; two-component system, OmpR family, heavy metal sensor histidine kinase CusS [EC:2.7.13.3]	K07644	Copper-silver	2.34e-05	2.45e-05	3.01e-05	2.72e-05	3.97e-05	3.02e-05	3.35e-05	5.77e-05	4.7e-05	3.64e-05	3.38e-05	1.73e-05	2.64e-05	3.87e-06	4.96e-05	3e-05	6.01e-05	3.25e-05	3.95e-05	4.87e-05	3.18e-05	3.21e-05	0.000942	0.00182923	0	0	0	9.41e-05	4.92e-05	0.000144	0	1.31e-06	1.24e-06	1.91e-06	4.32e-06	8.56e-06	5.41e-06	5.64e-06	3.19e-06	3.88e-05	0	3.65e-05	4.52e-05	5.56e-05
Environmental Information Processing	Signal transduction	02020 Two-component system [PATH:ko02020]	cusB, silB; Cu(I)/Ag(I) efflux system membrane protein CusB/SilB	K07798	Copper-silver	4.56e-06	1.13e-05	7.15e-06	1.57e-05	3.05e-05	9.63e-06	1.67e-05	0.000111	0.000188	0.000109	0.000124	3.67e-05	3.96e-05	3.49e-05	0.000228	0.000196	0.000169	9.03e-05	7.46e-05	0.000107	8.27e-05	0.000108	0.000344	0.000567	0	0	0	9.41e-05	7.37e-05	0	8.77e-05	2.8e-06	7.43e-06	1.11e-05	8.64e-06	0.000725	4.06e-05	0.000372	0.000548	0.000108	0.000179	0.000115	0.000132	0.000107
Environmental Information Processing	Signal transduction	02020 Two-component system [PATH:ko02020]	cusR, copR, silR; two-component system, OmpR family, copper resistance phosphate regulon response regulator CusR	K07665	Copper-silver	5.36e-05	4.89e-05	5.05e-05	4.65e-05	6.15e-05	5.5e-05	7.45e-05	0.000135	0.000125	0.000185	0.000207	0.000238	0.000185	0.000105	0.00028	0.000289	0.000269	0.000188	0.000146	0.000153	0.000181	0.000169	0.00063	0.00119868	0	0	0	0.000157	2.46e-05	7.2e-05	8.77e-05	6.25e-06	8.42e-06	1.26e-05	1.59e-05	3.71e-05	8.12e-06	0.000169	8.93e-05	5.27e-05	3.73e-06	0.000318	0.000337	0.000263
Environmental Information Processing	Signal transduction	02020 Two-component system [PATH:ko02020]	cusA, silA; Cu(I)/Ag(I) efflux system membrane protein CusA/SilA	K07787	Copper-silver	0.000298	0.00034	0.000292	0.000342	0.000484	0.000381	0.000227	0.000401	0.000478	0.000435	0.000323	0.000274	0.000227	0.000205	0.000625	0.00039	0.000651	0.000431	0.00037	0.000493	0.000347	0.000563	0.000869	0.00148604	5.06e-05	1.68e-05	0	0.000596	0.00027	0.000936	0.000526	2.43e-05	3.14e-05	3.41e-05	3.51e-05	0.0019882	0.000189	0.00169299	0.00167688	0.000341	0.000503	0.000828	0.000859	0.000847
Environmental Information Processing	Signal transduction	02020 Two-component system [PATH:ko02020]	liaF; lia operon protein LiaF	K11622	Envelope Stress	5.7e-07	1.06e-06	0	4.19e-07	3.2e-06	1.27e-06	5.4e-06	4.81e-06	0	2.6e-06	7.51e-06	0	0	0	2.48e-06	0	2.04e-06	3.9e-06	2.19e-06	1.86e-05	1.4e-06	1.01e-05	7.9e-06	1.15e-05	0	0	0	0	0	0	0	0	0	0	0	0	0	0	0	0	0	0	0	0
Environmental Information Processing	Signal transduction	02020 Two-component system [PATH:ko02020]	liaS; two-component system, NarL family, sensor histidine kinase LiaS [EC:2.7.13.3]	K11617	Envelope Stress	0	4.61e-06	8.38e-06	1.05e-06	6.83e-06	1.82e-06	1.08e-06	2.4e-05	3.13e-05	2.86e-05	1.13e-05	6.48e-06	0	1.55e-05	1.74e-05	2.31e-06	1.43e-05	2.57e-05	1.97e-05	6.3e-05	1.4e-05	3.38e-05	3.29e-05	3.12e-05	0	0	0	0	4.92e-05	0	0	2.8e-07	0	4.55e-08	0	0	0	0	0	0	0	1.59e-06	2.58e-06	2.23e-06
Environmental Information Processing	Signal transduction	02020 Two-component system [PATH:ko02020]	cpxA; two-component system, OmpR family, sensor histidine kinase CpxA [EC:2.7.13.3]	K07640	Envelope Stress	2.28e-06	9.57e-06	2.37e-05	2.53e-05	7.47e-06	2.03e-05	1.62e-05	1.68e-05	0	1.3e-05	2.63e-05	0	0	7.75e-06	0	9.23e-06	1.63e-05	6.17e-06	6.58e-06	1.15e-05	6.54e-06	2.03e-05	1.05e-05	1.64e-06	8.44e-05	0	0	0	0	0	0	9.32e-07	1.61e-06	3.73e-06	3.62e-06	0	5.41e-06	5.64e-06	6.38e-05	5.55e-06	0	2.59e-05	1.94e-05	2.34e-05
Environmental Information Processing	Signal transduction	02020 Two-component system [PATH:ko02020]	liaR; two-component system, NarL family, response regulator LiaR	K11618	Envelope Stress	5.7e-07	0	3.2e-06	6.28e-07	4.27e-07	3.81e-06	6.75e-06	4.81e-05	5.09e-05	0.000107	8.64e-05	0.000173	0.00019	0.000124	0.000117	9.69e-05	6.62e-05	9.13e-05	9.87e-05	9.74e-05	7.66e-05	6.59e-05	6.06e-05	2.13e-05	0	0	0	0	0	0	0	2.8e-07	3.71e-07	1.36e-07	2.16e-07	2.85e-06	0	5.64e-06	2.87e-05	0	0	8.83e-05	8.65e-05	6.34e-05
Environmental Information Processing	Signal transduction	02020 Two-component system [PATH:ko02020]	rstA; two-component system, OmpR family, response regulator RstA	K07661	General stress	2.28e-05	2.34e-05	3.28e-05	2.05e-05	3.74e-05	3.09e-05	2.97e-05	1.92e-05	1.96e-05	1.82e-05	7.51e-06	0	2.64e-06	1.16e-05	7.44e-06	4.62e-06	1.43e-05	1.49e-05	1.54e-05	3.72e-05	9.58e-06	1.69e-05	0.000111	0.000154	0	0	0	3.14e-05	2.46e-05	0	0	1.68e-06	2.23e-06	1.73e-06	4.27e-06	2.85e-06	0	3.95e-05	7.65e-05	0	3.73e-06	1.64e-05	2.32e-05	1.78e-05
Environmental Information Processing	Signal transduction	02020 Two-component system [PATH:ko02020]	rstB; two-component system, OmpR family, sensor histidine kinase RstB [EC:2.7.13.3]	K07639	General stress	3.59e-05	4.96e-05	5.32e-05	4.62e-05	4.44e-05	5.67e-05	5.78e-05	5.05e-05	5.87e-05	3.38e-05	2.25e-05	1.08e-05	2.64e-06	0	9.92e-06	2.31e-06	1.12e-05	1.62e-05	2.3e-05	3.01e-05	1.24e-05	3.55e-05	0.000215	0.000337	0	0	0	3.14e-05	2.46e-05	0.000144	4.38e-05	1.9e-05	1.72e-05	3.14e-05	3.18e-05	1.14e-05	1.62e-05	5.64e-06	3.19e-05	5.55e-06	3.73e-06	8.98e-06	6.45e-06	1.89e-05
Environmental Information Processing	Signal transduction	02020 Two-component system [PATH:ko02020]	kdpC; K+-transporting ATPase ATPase C chain [EC:3.6.3.12]	K01548	K limitation	6.85e-06	8.15e-06	1.01e-05	1.05e-05	1.07e-05	2.56e-05	2.51e-05	9.13e-05	5.87e-05	4.68e-05	1.5e-05	6.48e-05	3.17e-05	3.1e-05	2.73e-05	9.23e-06	3.05e-05	2.79e-05	3.51e-05	4.58e-05	5.05e-05	8.28e-05	0.000211	0.000406	0	0	0	0	0	0.00036	0	0	0	9.1e-08	6.48e-07	0	0	0	3.19e-06	5.55e-06	0	8.4e-05	9.94e-05	9.79e-05
Environmental Information Processing	Signal transduction	02020 Two-component system [PATH:ko02020]	kdpE; two-component system, OmpR family, KDP operon response regulator KdpE	K07667	K limitation	2.4e-05	2.3e-05	1.97e-05	2.82e-05	2.07e-05	2.23e-05	3.59e-05	0.000123	0.000157	0.0002	0.000225	0.000421	0.00042	0.000445	0.000288	0.000309	0.000237	0.000288	0.000274	0.000168	0.000322	0.00022	0.000279	0.00055	0	0	0	0	0	0.000144	0	4.94e-06	3.34e-06	8.55e-06	4.92e-06	2e-05	1.89e-05	1.13e-05	3.51e-05	2.22e-05	2.24e-05	0.000548	0.000558	0.00047
Environmental Information Processing	Signal transduction	02020 Two-component system [PATH:ko02020]	kdpD; two-component system, OmpR family, sensor histidine kinase KdpD [EC:2.7.13.3]	K07646	K limitation	5.88e-05	2.62e-05	4.83e-05	4.33e-05	3.42e-05	3.56e-05	9.69e-05	0.000296	0.000247	0.000258	0.000278	0.000439	0.000415	0.000492	0.000201	0.000199	0.000281	0.00028	0.000309	0.000266	0.000323	0.000301	0.000692	0.00121839	8.44e-05	0	0	0.000251	4.92e-05	0.00036	8.77e-05	1.68e-06	3.47e-06	1.04e-05	1e-05	1.43e-05	5.41e-06	5.64e-06	4.78e-05	5.55e-06	3.73e-06	0.000484	0.000437	0.000506
Environmental Information Processing	Signal transduction	02020 Two-component system [PATH:ko02020]	kdpA; K+-transporting ATPase ATPase A chain [EC:3.6.3.12]	K01546	K limitation	0.000192	0.000204	0.000318	0.000225	0.000131	0.00027	0.000287	0.000211	0.000121	0.000143	0.000113	0.000197	0.000119	0.000178	9.17e-05	9.69e-05	0.00012	0.000133	0.000141	0.00017	0.000134	0.000172	0.000486	0.00101149	0	0	0	0.000565	7.37e-05	0.000216	0.000219	2.8e-07	4.95e-07	1.36e-07	1.24e-06	0	5.41e-06	5.64e-06	3.19e-06	3.33e-05	0	0.000235	0.000286	0.000312
Environmental Information Processing	Signal transduction	02020 Two-component system [PATH:ko02020]	kdpB; K+-transporting ATPase ATPase B chain [EC:3.6.3.12]	K01547	K limitation	0.000408	0.000415	0.000537	0.000432	0.000438	0.000457064	0.000672	0.000238	0.000176	0.000135	0.000173	0.000171	0.000143	0.000155	5.21e-05	4.85e-05	0.000143	0.000147	0.000112	0.000153	0.000134	0.000313	0.000544	0.00155829	0	0	0	0.000377	2.46e-05	0.000144	4.38e-05	1.21e-06	3.96e-06	3.37e-06	5.67e-06	0	5.41e-06	0	1.91e-05	1.11e-05	0	0.000232	0.000279	0.00032
Environmental Information Processing	Membrane transport	02010 ABC transporters [PATH:ko02010]	mntB; manganese transport system permease protein	K11602	Mn limitation	0	0	0	0	0	0	2.7e-07	2.4e-06	1.17e-05	5.2e-06	1.5e-05	4.32e-06	2.64e-06	3.87e-06	1.49e-05	2.31e-05	2.04e-06	6.49e-06	1.43e-05	2.87e-06	1.07e-05	6.76e-06	2.63e-06	1.64e-06	0	0	0	0	0	0	0	0	0	0	0	0	0	0	9.56e-06	0	0	5.81e-06	6.45e-06	6.68e-06
Environmental Information Processing	Signal transduction	02020 Two-component system [PATH:ko02020]	manS; two-component system, OmpR family, manganese sensing sensor histidine kinase [EC:2.7.13.3]	K11520	Mn limitation	0	0	1.97e-06	0	0	0	2.7e-07	1.44e-05	3.92e-06	3.9e-05	5.63e-05	2.59e-05	3.96e-05	1.55e-05	1.74e-05	4.62e-06	9.16e-06	3.9e-06	3.29e-06	1.43e-06	5.14e-06	3.38e-06	1.32e-06	0	0	0	0	0	0	0	0	9.32e-08	2.48e-07	4.55e-08	5.4e-08	5.71e-06	0	0	1.59e-05	0	0	5.81e-06	6.45e-06	1.22e-05
Environmental Information Processing	Membrane transport	02010 ABC transporters [PATH:ko02010]	mntC; manganese transport system substrate-binding protein	K11601	Mn limitation	0	3.19e-06	1.48e-06	2.09e-07	0	1.45e-06	0	2.4e-06	3.92e-06	2.6e-06	0	4.32e-06	0	7.75e-06	1.74e-05	4.62e-05	3.05e-06	3.57e-06	8.77e-06	8.6e-06	7.71e-06	3.38e-06	0	0	0	0	0	0	0	0	0	4.59e-05	4.49e-05	1.68e-05	8.48e-06	0	0	0	3.19e-06	0	0	1.06e-06	0	1.11e-06
Environmental Information Processing	Signal transduction	02020 Two-component system [PATH:ko02020]	glnL, ntrB; two-component system, NtrC family, nitrogen regulation sensor histidine kinase GlnL [EC:2.7.13.3]	K07708	N limitation	0.000121	0.000174	0.000126	0.000122	0.000104	0.000123	8.15e-05	8.41e-05	0.000137	0.000104	9.39e-05	0.00013	0.000122	7.75e-05	0.000169	0.000155	0.000251	0.000168	0.000212	0.000149	0.000187	0.000208	0.000281	0.000488	3.37e-05	0	0	3.14e-05	0	0	0.000219	8.86e-05	0.000115	0.000137	0.000128	0.000294	0.000352	0.000299	0.000363	0.0004	0.000462	0.000208	0.000245	0.000248
Environmental Information Processing	Signal transduction	02020 Two-component system [PATH:ko02020]	glnB; nitrogen regulatory protein P-II 1	K04751	N limitation	0.000357	0.000285	0.000263	0.000321	0.000233	0.00029	0.000236	0.000214	0.000258	0.000216	0.000237	0.000359	0.000391	0.000411	0.000392	0.000487	0.000355	0.000329	0.000339	0.000358	0.000397	0.000269	0.000229	0.000245	0	0	0	3.14e-05	4.92e-05	0	8.77e-05	0.000399	0.000443	0.000421	0.000386	0.000576	0.000571	0.000547	0.000587	0.000494	0.000589	0.000477	0.000449	0.000454
Environmental Information Processing	Signal transduction	02020 Two-component system [PATH:ko02020]	glnG, ntrC; two-component system, NtrC family, nitrogen regulation response regulator GlnG	K07712	N limitation	0.000383	0.000333	0.000317	0.000361	0.000319	0.000363	0.000215	0.000173	0.000188	0.000148	0.000147	0.000169	0.000132	0.00012	0.000208	0.000222	0.000522	0.000352	0.000423	0.000325	0.000337	0.000394	0.000508	0.000645	0	0	0	3.14e-05	9.83e-05	0.000216	0.000307	0.000297	0.000358	0.000411	0.000405	0.000633	0.000896	0.00088	0.000791	0.00103781	0.000899	0.000563	0.000592	0.000713
Environmental Information Processing	Signal transduction	02020 Two-component system [PATH:ko02020]	glnD; [protein-PII] uridylyltransferase [EC:2.7.7.59]	K00990	N limitation	0.000165	0.000374	0.000395	0.000335	0.000282	0.000417	0.000319	0.000519	0.000501	0.000599	0.000462	0.000691	0.000647	0.000798	0.000694	0.000579	0.00124101	0.000973	0.00115825	0.000878	0.00114854	0.000996	0.000938	0.00117898	0.00081	0	0	0.000408	9.83e-05	0.00036	0.00157825	0.000307	0.000416	0.000506	0.000503	0.00119806	0.00148827	0.00118509	0.00131982	0.00145127	0.00149875	0.000895	0.000867	0.0010536
Environmental Information Processing	Signal transduction	02020 Two-component system [PATH:ko02020]	nrsA, czcA; cation efflux system protein involved in nickel and cobalt tolerance	K11326	Nickel-Cobalt	0	0	0	0	0	0	0	4.57e-05	1.96e-05	4.94e-05	5.63e-05	5.4e-05	4.23e-05	2.71e-05	3.47e-05	0	1.12e-05	5.2e-06	1.65e-05	0	9.35e-06	1.52e-05	7.9e-06	0	0	0	0	0	0	0	0	1.86e-07	3.71e-07	4.09e-07	3.78e-07	2.85e-05	0	5.64e-06	3.19e-06	5.55e-06	0	2.22e-05	1.16e-05	1.45e-05
Environmental Information Processing	Signal transduction	02020 Two-component system [PATH:ko02020]	degS; two-component system, NarL family, sensor histidine kinase DegS [EC:2.7.13.3]	K07777	Osmotic stress	0	5.32e-06	6.9e-06	1.28e-05	1.69e-05	5.27e-06	9.99e-06	4.09e-05	3.52e-05	3.64e-05	4.51e-05	4.32e-05	2.11e-05	3.49e-05	5.7e-05	5.77e-05	4.58e-05	4.16e-05	3.73e-05	6.16e-05	4.42e-05	5.75e-05	6.06e-05	1.97e-05	0	0	0	0	0	0	0	0	0	4.55e-08	0	0	0	5.64e-06	1.28e-05	0	0	1.9e-05	2.58e-05	2e-05
Environmental Information Processing	Signal transduction	02020 Two-component system [PATH:ko02020]	degU; two-component system, NarL family, response regulator DegU	K07692	Osmotic stress	1.71e-06	0	2.71e-05	1.09e-05	2.88e-05	1.22e-05	3.86e-05	3.12e-05	7.83e-05	4.42e-05	4.13e-05	3.67e-05	4.49e-05	0	6.45e-05	8.08e-05	4.48e-05	5.33e-05	5.05e-05	6.73e-05	4.16e-05	4.73e-05	5.14e-05	3.94e-05	0	0	0	0	0	0	0	1.86e-07	1.24e-07	9.1e-08	1.62e-07	0	0	0	1.28e-05	0	0	4.02e-05	4e-05	2.56e-05
Environmental Information Processing	Signal transduction	02020 Two-component system [PATH:ko02020]	mtrB; two-component system, OmpR family, sensor histidine kinase MtrB [EC:2.7.13.3]	K07654	Osmotic stress	5.59e-05	4.82e-05	5.55e-05	7.51e-05	0.000119	0.000112	6.8e-05	0.000291	0.000294	0.000323	0.00027	0.000395	0.000365	0.000387	0.000275	0.000259	0.000218	0.00035	0.000362	0.000417	0.000426	0.000384	0.000207	7.22e-05	0	0	0	6.28e-05	2.46e-05	0.000216	0	1.96e-06	2.72e-06	5e-07	5.4e-07	5.13e-05	2.71e-06	0	1.28e-05	2.77e-06	1.12e-05	0.000146	9.16e-05	0.000112
Environmental Information Processing	Membrane transport	02010 ABC transporters [PATH:ko02010]	opuC; osmoprotectant transport system substrate-binding protein	K05845	Osmotic stress	3.37e-05	6.45e-05	8.82e-05	5.13e-05	4.38e-05	4.98e-05	5.56e-05	0.000473	0.000255	0.000502	0.000477	0.000454	0.000452	0.000364	0.000389	0.000524	0.000355	0.000368	0.000288	0.00037	0.000395	0.000314	0.000263	0.000391	5.06e-05	0	0	9.41e-05	4.92e-05	0	0	2.14e-06	3.22e-06	1.32e-06	1.78e-06	5.99e-05	2.71e-06	3.95e-05	6.38e-06	8.32e-06	7.46e-06	0.000281	0.000265	0.000217
Environmental Information Processing	Signal transduction	02020 Two-component system [PATH:ko02020]	mtrA; two-component system, OmpR family, response regulator MtrA	K07670	Osmotic stress	0.0004	0.000374	0.000379	0.000345	0.000357	0.000403	0.000301	0.000262	0.000266	0.000333	0.000301	0.0003	0.000314	0.000469	0.000231	0.000265	0.000198	0.000223	0.000277	0.000213	0.000294	0.000269	0.000146	4.76e-05	0	0	0	3.14e-05	0	7.2e-05	0	3.54e-06	5.69e-06	4.82e-06	5.78e-06	5.13e-05	8.12e-06	5.64e-06	1.28e-05	0	3.73e-06	0.000149	0.000129	0.000161
Environmental Information Processing	Membrane transport	02010 ABC transporters [PATH:ko02010]	opuBD; osmoprotectant transport system permease protein	K05846	Osmotic stress	2.4e-05	0.000106	7.69e-05	4.23e-05	2.88e-05	6.21e-05	0.00012	0.000673	0.00056	0.000744	0.000594	0.000707	0.000792	0.000767	0.00061	0.000736	0.000616	0.000687	0.000591	0.000646	0.000706	0.000602	0.000644	0.000645	3.37e-05	0	0	0.000157	0	0	0	4.01e-06	1.47e-05	3.27e-06	4e-06	0.00012	1.89e-05	9.59e-05	5.42e-05	8.88e-05	1.86e-05	0.00049	0.00056	0.000488
Environmental Information Processing	Membrane transport	02010 ABC transporters [PATH:ko02010]	opuA; osmoprotectant transport system ATP-binding protein	K05847	Osmotic stress	0.000254	0.000386	0.000196	0.000203	0.000206	0.000245	0.00028	0.000493	0.000603	0.000614	0.000541	0.000745	0.000824	0.000717	0.000692	0.000667	0.000414	0.000634	0.000474	0.00053	0.000615	0.000578	0.000551	0.000578	1.69e-05	0	2.39e-05	0.000126	2.46e-05	7.2e-05	0.000175	7.58e-05	7.79e-05	0.000108	0.000114	0.000128	5.41e-05	0.000113	7.33e-05	0.000103	5.59e-05	0.000451	0.000445	0.000402
Environmental Information Processing	Signal transduction	02020 Two-component system [PATH:ko02020]	envZ; two-component system, OmpR family, osmolarity sensor histidine kinase EnvZ [EC:2.7.13.3]	K07638	Osmotic stress	9.07e-05	9.18e-05	9.39e-05	5.96e-05	8.65e-05	9.08e-05	6.72e-05	0.000115	0.000102	7.55e-05	0.000109	0.000125	6.6e-05	3.49e-05	0.000122	0.000132	0.000249	0.000164	0.000147	0.000181	0.000164	0.00015	0.000389	0.000704	0	0	0	6.28e-05	0	7.2e-05	0.000132	0.000457	0.000405	0.000667	0.000707	0.000365	0.00063	0.000254	0.000306	0.000391	0.000563	0.000157	0.000139	0.000148
Cellular Processes	Transport and catabolism	04146 Peroxisome [PATH:ko04146]	SOD1; superoxide dismutase, Cu-Zn family [EC:1.15.1.1]	K04565	Oxidative stress	2.91e-05	4.79e-05	8.28e-05	5.65e-05	4.59e-05	5.6e-05	5.88e-05	0.000252	0.000145	0.000193	0.000188	0.00021	0.000283	0.000244	0.000317	0.00027	0.00021	0.000226	0.000196	0.000208	0.000234	0.000242	0.000163	0.000163	3.37e-05	0.000151	4.78e-05	0	0.000172	0.000432	4.38e-05	4.3e-05	3.48e-05	7.51e-05	5.71e-05	0.000131	0.000181	4.51e-05	0.000112	0.000128	0.00013	0.000163	0.000177	0.000178
Cellular Processes	Transport and catabolism	04146 Peroxisome [PATH:ko04146]	SOD2; superoxide dismutase, Fe-Mn family [EC:1.15.1.1]	K04564	Oxidative stress	0.00152824	0.00136497	0.00131272	0.00129695	0.00117607	0.00128545	0.00123639	0.000858	0.000814	0.000854	0.000823	0.000823	0.000742	0.000666	0.000955	0.000776	0.000878	0.000681	0.000711	0.000733	0.000654	0.000675	0.000752	0.000563	0.000742	0.000168	0.000741	0.000753	0.000467	0.00100792	0.000745	0.000272	0.000296	0.000336	0.000337	0.000907	0.000698	0.000813	0.000689	0.000588	0.000775	0.000993	0.00104275	0.000984
Genetic Information Processing	Replication and repair	03410 Base excision repair [PATH:ko03410]	E3.1.11.2, xthA; exodeoxyribonuclease III [EC:3.1.11.2]	K01142	Oxidative stress	0.000852	0.00112991	0.00109212	0.00113583	0.00111691	0.00120552	0.0010167	0.00117992	0.00108858	0.0011684	0.00101426	0.000832	0.000837	0.000875	0.00101167	0.00099	0.00121759	0.0012272	0.001212	0.00115179	0.00110578	0.00124946	0.00129615	0.00115435	1.69e-05	0	0	0.000345	0.000246	0.000504	0.000175	0.00117074	0.00108848	0.00123453	0.00121391	0.00126081	0.0011365	0.00123588	0.00115724	0.000943	0.00122286	0.00113949	0.00123762	0.00133174
Cellular Processes	Transport and catabolism	04146 Peroxisome [PATH:ko04146]	katE, CAT, catB, srpA; catalase [EC:1.11.1.6]	K03781	Oxidative stress	0.00567885	0.00480329	0.00499454	0.0047262	0.00477281	0.00471924	0.00443142	0.00233341	0.00228288	0.00183717	0.00172049	0.000791	0.000745	0.000821	0.00146791	0.00141728	0.00167164	0.00176854	0.00154982	0.00185661	0.00126605	0.00212864	0.0027688	0.00233826	0.00123165	0.00114238	0.000956	0.000596	0.00127808	0.000288	0.000833	1.08e-05	8.67e-06	1.01e-05	8.8e-06	1.43e-05	5.41e-06	0.000124	0.000194	8.32e-06	7.46e-06	0.000755	0.000688	0.000792
Environmental Information Processing	Signal transduction	02020 Two-component system [PATH:ko02020]	arcA; two-component system, OmpR family, aerobic respiration control protein ArcA	K07773	Oxygen limitation	2.28e-06	8.51e-06	1.08e-05	6.49e-06	4.06e-06	9.08e-06	1.24e-05	2.4e-06	1.17e-05	5.2e-06	0	0	0	0	0	0	0	2.6e-06	0	7.16e-06	9.35e-07	1.86e-05	3.95e-06	0	0	0	0	3.14e-05	0	0	0	7.46e-07	2.48e-07	1.96e-06	8.64e-07	1.43e-05	0	0	3.19e-05	0	7.46e-06	0	2.58e-06	1.11e-06
Environmental Information Processing	Signal transduction	02020 Two-component system [PATH:ko02020]	arcB; two-component system, OmpR family, aerobic respiration control sensor histidine kinase ArcB [EC:2.7.13.3]	K07648	Oxygen limitation	5.7e-06	9.57e-06	1.87e-05	1.21e-05	2.78e-06	1.85e-05	1.3e-05	1.92e-05	2.35e-05	2.86e-05	0	2.16e-06	5.28e-06	1.55e-05	9.92e-06	1.62e-05	1.73e-05	2.47e-05	1.65e-05	2.58e-05	1.71e-05	2.03e-05	6.59e-06	3.28e-06	0	0	0	0.000157	0	0	0.000307	1.21e-06	1.61e-06	5.91e-06	1.84e-06	2.28e-05	2.71e-06	6.77e-05	9.88e-05	0	1.49e-05	1.16e-05	1.03e-05	2.11e-05
Environmental Information Processing	Signal transduction	02020 Two-component system [PATH:ko02020]	resE; two-component system, OmpR family, sensor histidine kinase ResE [EC:2.7.13.3]	K07651	Oxygen limitation	0	2.48e-06	1.85e-05	2.09e-07	6.41e-06	1.09e-06	1.4e-05	0.00013	0.000204	0.00012	0.000124	5.19e-05	5.28e-05	6.59e-05	7.93e-05	0.000129	5.19e-05	9.71e-05	7.79e-05	0.000182	5.61e-05	0.000128	0.000101	3.28e-05	0	0	0	0	0	0	0	2.61e-06	2.35e-06	3.41e-06	3.57e-06	8.56e-06	2.71e-06	3.39e-05	1.91e-05	2.77e-06	0	3.44e-05	4e-05	2e-05
Environmental Information Processing	Signal transduction	02020 Two-component system [PATH:ko02020]	resD; two-component system, OmpR family, response regulator ResD	K07775	Oxygen limitation	1.6e-05	1.28e-05	3.92e-05	1.38e-05	2.95e-05	2.85e-05	6.18e-05	0.000115	0.000106	9.37e-05	0.000116	3.02e-05	1.85e-05	1.55e-05	3.97e-05	6.46e-05	8.25e-05	0.000108	7.57e-05	0.00014	4.39e-05	0.000156	9.75e-05	3.78e-05	0	0	0	0	0	7.2e-05	0	1.8e-05	1.4e-05	2.77e-05	2.4e-05	8.56e-06	5.41e-06	5.64e-06	9.56e-06	2.77e-06	0	4.12e-05	3.74e-05	4.34e-05
Environmental Information Processing	Signal transduction	02020 Two-component system [PATH:ko02020]	senX3; two-component system, OmpR family, sensor histidine kinase SenX3 [EC:2.7.13.3]	K07768	P limitation	7.42e-06	3.55e-06	6.9e-06	1.59e-05	0	7.08e-06	8.91e-06	9.61e-05	9.79e-05	0.000104	0.000116	4.32e-05	8.19e-05	4.26e-05	6.69e-05	7.62e-05	4.89e-05	8.35e-05	8.12e-05	4.3e-05	6.42e-05	9.3e-05	0.000111	3.28e-05	0	0	0	0	0	0	0	4.94e-06	4.46e-06	7.32e-06	1.09e-05	3.71e-05	1.89e-05	0	6.38e-06	0	0	4.07e-05	3.1e-05	4.9e-05
Environmental Information Processing	Signal transduction	02020 Two-component system [PATH:ko02020]	regX3; two-component system, OmpR family, response regulator RegX3	K07776	P limitation	0.000711	0.0005	0.000458	0.000468	0.0005	0.000514	0.00032	0.000221	0.000231	0.00026	0.000225	0.000376	0.000454	0.000488	0.00029	0.000365	0.000227	0.000299	0.000348	0.000301	0.000373	0.000276	0.000165	7.22e-05	0	0	0	0	2.46e-05	0	0	2.67e-05	2.02e-05	1.63e-05	2.22e-05	8.84e-05	2.71e-06	7.9e-05	3.83e-05	2.77e-06	7.46e-06	0.000217	0.000244	0.000221
Environmental Information Processing	Signal transduction	02020 Two-component system [PATH:ko02020]	E3.1.3.1, phoA, phoB; alkaline phosphatase [EC:3.1.3.1]	K01077	P limitation	5.48e-05	7.76e-05	7.67e-05	4.73e-05	9.7e-05	8.7e-05	0.000137	0.000548	0.000603	0.000593	0.000552	0.000458	0.000404	0.000372	0.000501	0.000485	0.000478	0.000373	0.000381	0.000447	0.000341	0.000411	0.000734	0.00121018	0.000135	0	0.00043	0.000251	9.83e-05	0.00179986	0.00438404	0.000644	0.000675	0.00028	0.000193	0.000314	0.000514	0.0007	0.00052	0.000241	0.000473	0.000312	0.000252	0.000273
Environmental Information Processing	Membrane transport	02010 ABC transporters [PATH:ko02010]	pstS; phosphate transport system substrate-binding protein	K02040	P limitation	0.000245	0.00022	0.000346	0.000308	0.000283	0.000335	0.000393	0.000944	0.00092	0.00112416	0.000913	0.00103707	0.000985	0.00106524	0.000972	0.00100872	0.000982	0.00100638	0.00103431	0.000894	0.000991	0.00100261	0.000919	0.00101806	0.000354	0	0	0.000282	0.000172	0.000144	0.000614	0.00189416	0.00175343	0.00147278	0.00133188	0.00118379	0.00121767	0.00158013	0.00105522	0.00101007	0.00136453	0.00100895	0.00100145	0.00103135
Environmental Information Processing	Signal transduction	02020 Two-component system [PATH:ko02020]	spo0B; stage 0 sporulation protein B (sporulation initiation phosphotransferase) [EC:2.7.-.-]	K06375	Sporulation	5.7e-07	0	2.71e-06	1.05e-06	3.42e-06	5.45e-07	5.67e-06	0	0	0	0	0	0	0	0	0	0	7.79e-06	2.19e-06	1.86e-05	2.57e-06	5.07e-06	0	1.64e-06	0	0	0	0	0	0	0	0	0	0	0	0	0	0	0	0	0	0	0	0
Environmental Information Processing	Signal transduction	02020 Two-component system [PATH:ko02020]	kinD; two-component system, sporulation sensor kinase D [EC:2.7.13.3]	K13532	Sporulation	5.7e-07	3.55e-07	9.37e-06	1.88e-06	3.2e-06	2.72e-06	4.86e-06	4.81e-06	7.83e-06	2.6e-06	0	0	0	0	0	0	2.04e-06	1.62e-06	3.29e-06	1e-05	9.35e-07	3.38e-06	2.63e-06	0	0	0	0	0	0	0	0	9.32e-08	0	9.1e-08	1.62e-07	0	0	0	3.19e-06	0	0	0	1.29e-06	0
Environmental Information Processing	Signal transduction	02020 Two-component system [PATH:ko02020]	kapB; kinase-associated protein B	K06347	Sporulation	0	0	1.97e-06	1.67e-06	2.14e-06	4.9e-06	6.21e-06	1.2e-05	1.96e-05	1.56e-05	7.51e-06	0	0	3.87e-06	4.96e-06	6.92e-06	7.13e-06	7.79e-06	5.48e-06	2.01e-05	3.04e-06	6.76e-06	1.05e-05	6.57e-06	0	0	0	0	0	0	0	0	0	0	0	0	0	0	0	0	0	0	0	0
Environmental Information Processing	Signal transduction	02020 Two-component system [PATH:ko02020]	spo0F; two-component system, response regulator, stage 0 sporulation protein F	K02490	Sporulation	5.7e-07	1.06e-06	3.94e-06	1.46e-06	2.14e-06	1.27e-06	3.51e-06	9.61e-06	1.57e-05	1.82e-05	1.5e-05	2.16e-06	7.92e-06	0	9.92e-06	6.92e-06	1.53e-05	1.27e-05	9.87e-06	1.43e-05	1.03e-05	1.52e-05	1.19e-05	1.64e-06	0	0	0	6.28e-05	0	0	0	0	2.48e-07	0	0	0	0	0	3.19e-06	0	0	5.81e-06	2.58e-06	6.68e-06
Environmental Information Processing	Signal transduction	02020 Two-component system [PATH:ko02020]	kinE; two-component system, sporulation sensor kinase E [EC:2.7.13.3]	K13533	Sporulation	0	2.48e-06	8.87e-06	4.19e-06	5.34e-06	1.82e-06	3.24e-06	4.81e-06	1.17e-05	1.3e-05	3.76e-06	0	0	0	2.48e-06	1.38e-05	1.32e-05	2.37e-05	1.54e-05	7.02e-05	1.12e-05	1.69e-05	1.05e-05	3.28e-06	0	0	0	0	0	0	0	9.32e-08	2.48e-07	0	1.08e-07	2.85e-06	2.71e-06	5.64e-06	0	0	7.46e-06	3.7e-06	5.16e-06	2.23e-06
Environmental Information Processing	Signal transduction	02020 Two-component system [PATH:ko02020]	kinA; two-component system, sporulation sensor kinase A [EC:2.7.13.3]	K02491	Sporulation	0	0	1.01e-05	5.23e-06	6.41e-06	4.18e-06	1.05e-05	1.44e-05	1.17e-05	1.56e-05	3.76e-06	1.51e-05	1.32e-05	3.87e-06	7.44e-06	9.23e-06	2.14e-05	2.08e-05	1.75e-05	6.16e-05	1.21e-05	1.86e-05	1.58e-05	6.57e-06	0	0	2.39e-05	3.14e-05	0	0	0	0	0	0	0	0	0	0	0	0	0	6.87e-06	7.74e-06	1.11e-06
Environmental Information Processing	Signal transduction	02020 Two-component system [PATH:ko02020]	kinB; two-component system, sporulation sensor kinase B [EC:2.7.13.3]	K07697	Sporulation	5.7e-07	2.13e-06	6.16e-06	3.35e-06	3.42e-06	2e-06	6.21e-06	2.4e-06	1.96e-05	2.6e-05	1.88e-05	0	2.64e-06	0	9.92e-06	2.08e-05	3.56e-05	2.89e-05	9.87e-06	9.45e-05	2.36e-05	1.18e-05	9.22e-06	8.21e-06	0	0	0	0	0	0	0	4.66e-07	2.48e-07	0	1.62e-07	0	0	0	0	0	0	0	2.58e-06	1.11e-06
Environmental Information Processing	Signal transduction	02020 Two-component system [PATH:ko02020]	spo0A; two-component system, response regulator, stage 0 sporulation protein A	K07699	Sporulation	5.7e-06	1.81e-05	2.17e-05	1.57e-05	3.46e-05	2.8e-05	0.000102	0.000132	7.05e-05	0.000151	4.13e-05	8.64e-06	5.28e-06	7.75e-06	1.49e-05	2.31e-05	2.75e-05	7.63e-05	4.72e-05	0.000109	1.75e-05	8.12e-05	0.000126	3.45e-05	0	0	0	0	0	0	0	1.86e-07	3.71e-07	1.36e-07	1.08e-07	0	0	0	0	0	0	1.06e-06	3.87e-06	3.34e-06
Environmental Information Processing	Signal transduction	02020 Two-component system [PATH:ko02020]	desK; two-component system, NarL family, sensor histidine kinase DesK [EC:2.7.13.3]	K07778	Temperature	3.42e-06	4.61e-06	1.53e-05	5.86e-06	1.54e-05	9.45e-06	1.51e-05	0.000248	0.000129	0.000161	0.000188	0.000132	0.000132	0.000155	0.000109	9.23e-05	9.16e-05	0.000147	0.000146	0.00016	0.00013	0.000183	0.000109	4.27e-05	0	0	0	0	2.46e-05	0.000144	0	3.73e-07	6.19e-07	1.27e-06	5.4e-07	2.85e-06	0	3.39e-05	9.56e-06	0	0	5.23e-05	4.65e-05	3.67e-05
Environmental Information Processing	Signal transduction	02020 Two-component system [PATH:ko02020]	desR; two-component system, NarL family, response regulator DesR	K07693	Temperature	5.7e-07	1.99e-05	2.46e-07	2.85e-05	2.67e-05	1.58e-05	2.35e-05	0.000233	0.000192	0.000252	0.000267	0.000242	0.000264	0.000294	0.000112	0.000166	0.000122	0.000171	0.000173	0.000193	0.000166	0.000188	0.000126	4.93e-05	0	0	0	0	4.92e-05	0	4.38e-05	1.86e-07	2.48e-07	1.09e-06	2.7e-07	0	2.71e-06	4.51e-05	1.91e-05	0	0	0.000146	0.000108	9.9e-05
Environmental Information Processing	Signal transduction	02020 Two-component system [PATH:ko02020]	vicK; two-component system, OmpR family, sensor histidine kinase VicK [EC:2.7.13.3]	K07652	Temperature	1.94e-05	5.35e-05	0.000111	9.44e-05	6.17e-05	0.000108	0.000154	0.000329	0.00027	0.000312	0.00024	0.000233	0.000219	0.000167	0.000263	0.000275	0.000209	0.000257	0.000214	0.000397	0.000152	0.000277	0.000291	5.91e-05	1.69e-05	0	0	3.14e-05	0	0	0	3.75e-05	3.89e-05	5.56e-05	5.23e-05	2.57e-05	2.44e-05	6.21e-05	8.29e-05	1.39e-05	5.22e-05	0.000167	0.000136	0.000145
Environmental Information Processing	Signal transduction	02020 Two-component system [PATH:ko02020]	vicR; two-component system, OmpR family, response regulator VicR	K07668	Temperature	2.4e-05	9.4e-05	0.000131	8.56e-05	0.000109	0.000138	0.000177	0.000216	0.000184	0.000286	0.000192	0.000393	0.00042	0.000294	0.000243	0.000282	0.00019	0.000265	0.00025	0.000275	0.000202	0.000274	0.000209	5.25e-05	0	0	0	0	0	0	0	3.58e-05	1.94e-05	2.89e-05	3.51e-05	2.85e-05	1.62e-05	0.000102	9.25e-05	2.77e-06	1.49e-05	0.000255	0.000298	0.000219
Environmental Information Processing	Signal transduction	02020 Two-component system [PATH:ko02020]	FAD6, desA; omega-6 fatty acid desaturase (delta-12 desaturase) [EC:1.14.19.-]	K10255	Temperature	3.76e-05	7.34e-05	8.58e-05	6.76e-05	8.44e-05	6.67e-05	0.000154	0.00019	0.000255	0.00025	0.000229	0.000181	0.00023	0.000128	0.000171	0.000242	0.000146	0.000184	0.000106	0.000221	0.000169	0.000128	0.000146	0.000164	0	0	0	0	0	0.000288	0.000263	0.000306	0.000258	9.44e-05	6.21e-05	0.000131	2.71e-05	0.000192	8.61e-05	0.000103	5.22e-05	0.000211	0.000143	0.000194
Genetic Information Processing	Folding, sorting and degradation	03018 RNA degradation [PATH:ko03018]	groEL, HSPD1; chaperonin GroEL	K04077	Temperature	0.0083092	0.00717055	0.00644602	0.0072521	0.00625256	0.006283	0.00538388	0.00221085	0.00261572	0.00320854	0.00282116	0.00396462	0.0036847	0.0035947	0.00345406	0.0036517	0.00337077	0.00296132	0.0031512	0.00285511	0.0030968	0.00319211	0.00221161	0.00180459	0.0019234	0.00335993	0.00215157	0.00207091	0.000737	0.00259179	0.00495397	0.00448507	0.00495041	0.00403415	0.00396864	0.00338023	0.00407786	0.00404625	0.00303177	0.00402083	0.00369467	0.00380852	0.00403291	0.00342893
Genetic Information Processing	Replication and repair	03420 Nucleotide excision repair [PATH:ko03420]	uvrA; excinuclease ABC subunit A	K03701	UV resistance	0.0086857	0.00789381	0.00744326	0.00801169	0.00696221	0.00761804	0.00603514	0.00344604	0.00315218	0.0036301	0.00356119	0.0034893	0.0036847	0.00344363	0.00387559	0.00410874	0.00443973	0.00432946	0.0043972	0.00439655	0.00375401	0.00445678	0.00408997	0.00314449	0.000101	0.000235	0.00012	0.00156887	0.000639	0.00280778	0.00276195	0.00549355	0.00520335	0.00578976	0.00593851	0.00531423	0.00513047	0.00542886	0.0055184	0.00404026	0.00483551	0.00554629	0.00582933	0.00585878
Environmental Information Processing	Signal transduction	04011 MAPK signaling pathway - yeast [PATH:ko04011]	WSC; cell wall integrity and stress response component	K11244	Cell-wall stress	4.56e-06	1.06e-06	4.19e-06	3.14e-06	1.28e-06	0	1.08e-06	2.4e-05	1.17e-05	1.3e-05	3.76e-06	0	0	0	7.44e-06	4.62e-06	3.05e-06	1.95e-06	1.1e-06	4.3e-06	1.17e-06	0	0	0	0	1.68e-05	0.000191	0.000126	0.000221	0	0	1.77e-06	9.9e-07	4.55e-07	3.78e-07	0	5.41e-06	0	0	0	0	5.29e-07	0	2.23e-06
Environmental Information Processing	Signal transduction	02020 Two-component system [PATH:ko02020]	YPD1; osomolarity two-component system, phosphorelay intermediate protein YPD1	K11232	Osmotic stress	5.7e-07	3.9e-06	1.31e-05	5.44e-06	5.55e-06	7.27e-07	1.05e-05	3.12e-05	3.92e-05	1.3e-05	3.01e-05	0	0	3.87e-06	4.96e-06	4.62e-06	3.05e-06	2.6e-06	1.1e-06	2.87e-06	2.34e-06	6.76e-06	1.32e-06	0	0.000152	0.000118	0	6.28e-05	0	0	0	0	0	0	0	0	0	0	0	0	0	0	0	0
Environmental Information Processing	Signal transduction	04011 MAPK signaling pathway - yeast [PATH:ko04011]	SHO1; SHO1 osmosensor	K11246	Osmotic stress	3.99e-06	1.31e-05	2.39e-05	1.34e-05	1.15e-05	1.8e-05	2.86e-05	6.97e-05	0.000106	2.34e-05	5.63e-05	0	0	3.87e-06	1.24e-05	2.31e-05	3.05e-06	4.55e-06	1.1e-06	2.87e-06	4.67e-07	1.69e-06	2.63e-06	0	0.000337	0.000151	0.000598	3.14e-05	7.37e-05	0	0	0	0	0	0	0	0	0	0	0	0	0	0	0
Environmental Information Processing	Signal transduction	02020 Two-component system [PATH:ko02020]	SSK1; osomolarity two-component system, response regulator SSK1	K11233	Osmotic stress	3.99e-06	1.6e-05	5.62e-05	3.77e-05	2.56e-05	2.91e-05	0.000104	0.000125	0.000137	8.07e-05	0.000124	4.32e-06	0	3.87e-06	3.97e-05	3.69e-05	1.83e-05	8.77e-06	4.39e-06	2.44e-05	6.54e-06	3.38e-06	7.9e-06	0	0.000186	3.36e-05	0.000215	0.000251	9.83e-05	0.000144	0	9.32e-08	0	4.55e-08	1.08e-07	0	0	1.13e-05	0	0	0	5.29e-07	0	2.23e-06
Environmental Information Processing	Signal transduction	02020 Two-component system [PATH:ko02020]	SLN1; osomolarity two-component system, sensor histidine kinase SLN1 [EC:2.7.13.3]	K11231	Osmotic stress	0	3.55e-07	9.49e-05	4.19e-07	6.47e-05	6.03e-05	7.8e-05	0.000185	0.000141	7.03e-05	0.000116	1.08e-05	5.28e-06	1.55e-05	5.46e-05	5.77e-05	1.73e-05	3.41e-05	2.08e-05	1.58e-05	1.66e-05	1.86e-05	1.45e-05	0	8.44e-05	0.000101	0	6.28e-05	0.000147	7.2e-05	8.77e-05	6.53e-07	6.19e-07	6.82e-07	1.51e-06	5.71e-06	0	1.69e-05	6.38e-06	2.77e-06	0	8.98e-06	1.68e-05	1.22e-05
Environmental Information Processing	Signal transduction	02020 Two-component system [PATH:ko02020]	SSK2; mitogen-activated protein kinase kinase kinase [EC:2.7.11.25]	K11230	Osmotic stress	7.47e-05	8.37e-05	0.000344	0.000123	0.000363	0.000212	0.000448	0.000238	0.000215	6.25e-05	0.000218	6.48e-06	2.64e-06	6.2e-05	8.93e-05	4.39e-05	2.14e-05	2.21e-05	1.21e-05	3.58e-05	8.18e-06	3.04e-05	1.32e-05	1.64e-06	0.00167032	0.00188156	0.00138656	0.000533	0.000295	0.000144	8.77e-05	8.39e-07	1.36e-06	2.73e-07	3.78e-07	0	2.71e-06	5.64e-06	0	1.66e-05	7.46e-06	6.34e-06	3.87e-06	1.11e-06
Environmental Information Processing	Signal transduction	04011 MAPK signaling pathway - yeast [PATH:ko04011]	SHO1; SHO1 osmosensor	K11246	Starvation	3.99e-06	1.31e-05	2.39e-05	1.34e-05	1.15e-05	1.8e-05	2.86e-05	6.97e-05	0.000106	2.34e-05	5.63e-05	0	0	3.87e-06	1.24e-05	2.31e-05	3.05e-06	4.55e-06	1.1e-06	2.87e-06	4.67e-07	1.69e-06	2.63e-06	0	0.000337	0.000151	0.000598	3.14e-05	7.37e-05	0	0	0	0	0	0	0	0	0	0	0	0	0	0	0
Genetic Information Processing	Replication and repair	03420 Nucleotide excision repair [PATH:ko03420]	XPA; DNA-repair protein complementing XP-A cells	K10847	UV resistance	1.94e-05	2.16e-05	7.74e-05	8.79e-06	6.58e-05	2.4e-05	3.21e-05	6.01e-05	9.01e-05	4.68e-05	8.64e-05	0	0	3.87e-06	2.73e-05	6.92e-06	2.04e-06	6.17e-06	1.1e-06	1e-05	2.8e-06	1.69e-06	1.32e-06	0	0.00170407	0.000403	0.00043	0.000345	0.000197	0	0	9.32e-08	0	0	0	0	0	0	6.38e-06	0	0	0	0	2.23e-06
Environmental Information Processing	Signal transduction	02020 Two-component system [PATH:ko02020]	rcp1; two-component system, chemotaxis family, response regulator Rcp1	K11355	Chemotaxis	6.27e-06	0	3.94e-06	3.77e-06	3.63e-06	2.72e-06	6.21e-06	0	0	5.2e-06	7.51e-06	4.32e-06	1.32e-05	1.55e-05	7.44e-06	6.92e-06	7.13e-06	5.52e-06	6.58e-06	4.3e-06	5.61e-06	1.01e-05	2.63e-06	0	0	0	0	3.14e-05	0	0	4.38e-05	0	0	0	5.4e-08	2.85e-06	0	1.69e-05	3.19e-06	0	0	1.32e-05	1.68e-05	1.11e-05
Cellular Processes	Cell motility	02030 Bacterial chemotaxis [PATH:ko02030]	tar; methyl-accepting chemotaxis protein II, aspartate sensor receptor	K05875	Chemotaxis	3.99e-06	1.42e-05	1.26e-05	1.19e-05	5.77e-06	1.54e-05	7.02e-06	2.88e-05	0	1.04e-05	7.51e-06	2.16e-06	0	3.87e-06	7.44e-06	9.23e-06	3.87e-05	1.82e-05	1.86e-05	2.29e-05	1.07e-05	2.87e-05	5.93e-05	0.000153	0	0	0	3.14e-05	4.92e-05	7.2e-05	0	7.46e-07	1.24e-06	1.91e-06	8.64e-07	0	0	0	9.56e-06	0	0	1.16e-05	9.03e-06	1.11e-05
Environmental Information Processing	Signal transduction	02020 Two-component system [PATH:ko02020]	cph1; two-component system, chemotaxis family, sensor kinase Cph1 [EC:2.7.13.3]	K11354	Chemotaxis	0	0	0	0	0	0	2.67e-05	2.64e-05	3.13e-05	6.51e-05	5.26e-05	6.27e-05	6.34e-05	3.87e-05	7.44e-05	2.54e-05	6.31e-05	3.86e-05	4.72e-05	3.15e-05	3.76e-05	2.71e-05	1.05e-05	8.21e-06	0	0	0	0	0	0	0	0	0	9.1e-08	0	1.14e-05	0	3.95e-05	6.69e-05	0	0	4.86e-05	4e-05	6.45e-05
Cellular Processes	Cell motility	02030 Bacterial chemotaxis [PATH:ko02030]	cheC; chemotaxis protein CheC	K03410	Chemotaxis	5.7e-07	1.77e-06	3.7e-06	2.09e-06	4.27e-06	1.45e-06	4.05e-06	4.81e-05	4.31e-05	6.51e-05	4.51e-05	7.56e-05	4.75e-05	5.81e-05	6.94e-05	6e-05	7.23e-05	5.29e-05	6.03e-05	7.45e-05	5.35e-05	4.4e-05	4.35e-05	6.57e-05	0	0	0	0	0	0	0	0	0	0	2.16e-07	0	0	0	3.19e-06	0	0	3.28e-05	3.74e-05	3.89e-05
Cellular Processes	Cell motility	02030 Bacterial chemotaxis [PATH:ko02030]	cheZ; chemotaxis protein CheZ	K03414	Chemotaxis	8.56e-06	1.88e-05	1.85e-05	8.58e-06	1.64e-05	2.4e-05	1.19e-05	1.68e-05	2.35e-05	2.08e-05	2.25e-05	1.73e-05	1.06e-05	7.75e-06	2.48e-05	4.62e-05	9.06e-05	4.25e-05	5.16e-05	3.87e-05	4.11e-05	5.24e-05	0.000175	0.000253	0	0	0	0	4.92e-05	0	0	1.4e-06	3.22e-06	2.09e-06	2.16e-06	2.85e-06	0	1.69e-05	3.83e-05	0	0	2.48e-05	2.71e-05	3.89e-05
Cellular Processes	Cell motility	02030 Bacterial chemotaxis [PATH:ko02030]	cheD; chemotaxis protein CheD [EC:3.5.1.44]	K03411	Chemotaxis	3.14e-05	2.09e-05	2.88e-05	2.45e-05	2.11e-05	2.05e-05	1.81e-05	7.45e-05	6.27e-05	6.51e-05	3.38e-05	1.73e-05	2.38e-05	7.75e-06	6.45e-05	6.46e-05	0.000102	7.08e-05	9.1e-05	6.59e-05	4.74e-05	0.000117	0.000252	0.000379	0	0	0	3.14e-05	9.83e-05	0	0	9.32e-07	3.71e-07	1.14e-06	1.08e-06	1.71e-05	1.35e-05	2.26e-05	6.06e-05	2.77e-06	1.12e-05	5.71e-05	6.97e-05	8.68e-05
Cellular Processes	Cell motility	02030 Bacterial chemotaxis [PATH:ko02030]	tsr; methyl-accepting chemotaxis protein I, serine sensor receptor	K05874	Chemotaxis	5.7e-06	3.51e-05	5.15e-05	1.36e-05	1.37e-05	3.65e-05	2.27e-05	4.57e-05	1.57e-05	2.34e-05	2.63e-05	1.08e-05	5.28e-06	0	3.22e-05	4.62e-05	0.000137	7.11e-05	0.000136	6.02e-05	5.77e-05	0.000122	0.000278	0.000851	0	0	0	6.28e-05	4.92e-05	0	0	8.39e-07	3.1e-06	1.64e-06	4.92e-06	5.71e-06	5.41e-06	3.39e-05	9.56e-06	1.66e-05	0	5.02e-05	4.9e-05	6.01e-05
Environmental Information Processing	Signal transduction	02020 Two-component system [PATH:ko02020]	chpA; chemosensory pili system protein ChpA (sensor histidine kinase/response regulator)	K06596	Chemotaxis	2.28e-06	1.67e-05	1.73e-06	1.11e-05	1.75e-05	0	0	0.000132	0.000102	0.000148	0.000124	6.05e-05	6.6e-05	6.2e-05	0.000186	9e-05	0.000328	0.000162	0.000206	0.000146	0.000133	0.000211	0.000254	0.000276	6.75e-05	0	0	0	0	0	0.000219	2.8e-06	2.35e-06	1.09e-06	4.11e-06	3.71e-05	0	0.000181	0.000153	3.61e-05	0	0.000174	0.000187	0.000213
Cellular Processes	Cell motility	02030 Bacterial chemotaxis [PATH:ko02030]	cheW; purine-binding chemotaxis protein CheW	K03408	Chemotaxis	6.85e-05	5.5e-05	8.31e-05	5.8e-05	8.54e-05	5.2e-05	6.5e-05	0.000123	9.01e-05	0.000135	0.000113	0.000147	0.00014	0.000151	0.000171	0.000212	0.00026	0.000229	0.000241	0.000268	0.000259	0.000228	0.000382	0.0005977	0	0	0	0	0	7.2e-05	0.000132	8.3e-06	1.11e-05	9.37e-06	1.18e-05	3.14e-05	2.98e-05	0.000124	9.88e-05	5.55e-06	7.46e-06	0.000146	0.000159	0.000174
Cellular Processes	Cell motility	02030 Bacterial chemotaxis [PATH:ko02030]	cheY; two-component system, chemotaxis family, response regulator CheY	K03413	Chemotaxis	0.000101	0.000133	0.00014	0.000122	0.000116	0.000108	0.000122	0.000202	0.000192	0.000245	0.000293	0.000318	0.000314	0.000294	0.000372	0.000395	0.000407	0.000365	0.000409	0.00035	0.000385	0.00036	0.000422	0.000647	0	0	0	6.28e-05	0	7.2e-05	0	1.29e-05	1.52e-05	1.33e-05	1.5e-05	0.000106	1.89e-05	0.000333	0.000207	1.66e-05	7.46e-06	0.00036	0.000297	0.000333
Cellular Processes	Cell motility	02030 Bacterial chemotaxis [PATH:ko02030]	cheR; chemotaxis protein methyltransferase CheR [EC:2.1.1.80]	K00575	Chemotaxis	7.59e-05	0.00019	0.000161	0.000173	0.000139	0.000178	0.00011	0.000308	0.000403	0.000435	0.000537	0.000817	0.000676	0.000693	0.000642	0.000743	0.000833	0.000706	0.000681	0.000613	0.000791	0.000565	0.000605	0.000622	1.69e-05	0	0	0.000157	0.000123	0.000432	0	7.18e-06	1.06e-05	1.09e-05	1.51e-05	4.28e-05	5.14e-05	0.000135	0.00022	1.94e-05	7.46e-06	0.00094	0.000901	0.00099
Cellular Processes	Cell motility	02030 Bacterial chemotaxis [PATH:ko02030]	cheB; two-component system, chemotaxis family, response regulator CheB [EC:3.1.1.61]	K03412	Chemotaxis	5.31e-05	7.48e-05	0.000117	6.47e-05	7.58e-05	6.7e-05	7.26e-05	0.000377	0.000376	0.000536	0.000669	0.000808	0.000898	0.000751	0.00100423	0.000939	0.00132754	0.00092	0.00110999	0.000923	0.00109737	0.000769	0.00117496	0.00149918	5.06e-05	0	0	0.00022	2.46e-05	0.000144	0.000614	3.66e-05	6.33e-05	7.2e-05	9.84e-05	9.7e-05	1.89e-05	0.000457	0.000309	3.05e-05	3.36e-05	0.001149	0.00105307	0.00115818
Cellular Processes	Cell motility	02030 Bacterial chemotaxis [PATH:ko02030]	cheA; two-component system, chemotaxis family, sensor kinase CheA [EC:2.7.13.3]	K03407	Chemotaxis	3.25e-05	0.00028	0.000207	0.000251	0.00022	0.000246	0.000204	0.000447	0.000419	0.000518	0.000567	0.00067	0.000613	0.000713	0.000754	0.000849	0.00131838	0.000972	0.00112535	0.00103288	0.00108476	0.00104488	0.00114598	0.00162069	0.000169	0	0	0.000157	0	0.000432	0.000395	5.64e-05	5.78e-05	7.26e-05	9.96e-05	0.000154	6.22e-05	0.000801	0.000529	5.83e-05	3.36e-05	0.00092	0.000869	0.000889
Cellular Processes	Cell motility	02030 Bacterial chemotaxis [PATH:ko02030]	cheBR; two-component system, chemotaxis family, CheB/CheR fusion protein [EC:2.1.1.80 3.1.1.61]	K13924	Chemotaxis	0	0	2.86e-05	0	2.97e-05	2.42e-05	1.84e-05	0.000596	0.000544	0.000799	0.000856	0.000994	0.000874	0.000798	0.00163405	0.0012811	0.00184878	0.00110705	0.00119006	0.000884	0.00118008	0.000793	0.000317	0.000131	1.69e-05	0	2.39e-05	0.000188	7.37e-05	7.2e-05	0.000132	3.82e-06	8.42e-06	8.32e-06	3.02e-06	9.7e-05	1.08e-05	0.000181	0.000293	1.11e-05	2.61e-05	0.0019661	0.00183514	0.00226519
Cellular Processes	Cell motility	02030 Bacterial chemotaxis [PATH:ko02030]	mcp; methyl-accepting chemotaxis protein	K03406	Chemotaxis	0.000161	0.000228	0.000371	0.000167	0.00021	0.000241	0.000307	0.000836	0.000936	0.000851	0.000823	0.000815	0.000724	0.000852	0.00119516	0.00121646	0.00218983	0.0015107	0.00172203	0.00183655	0.00152585	0.00214216	0.00640828	0.0108473	1.69e-05	0	0	0.000659	0.000565	0.00136789	0.00140289	6.14e-05	8.2e-05	9.97e-05	0.000133	0.000422	7.85e-05	0.00121896	0.00152704	0.000189	6.71e-05	0.00106602	0.000959	0.00125609
Cellular Processes	Cell motility	02040 Flagellar assembly [PATH:ko02040]	motC; chemotaxis protein MotC	K10564	Flagellum	0	0	9.86e-07	6.28e-07	0	0	2.7e-06	0	1.17e-05	1.3e-05	1.88e-05	6.48e-06	0	0	0	1.38e-05	2.04e-05	3.57e-06	1.21e-05	1e-05	6.54e-06	8.45e-06	3.95e-06	1.64e-06	0	0	0	0	0	0	0	0	0	0	0	0	0	0	0	0	0	1.06e-06	0	1.11e-06
Cellular Processes	Cell motility	02040 Flagellar assembly [PATH:ko02040]	fliT; flagellar protein FliT	K02423	Flagellum	3.99e-06	1.77e-06	2.71e-06	2.09e-06	1.71e-06	1.63e-06	2.97e-06	1.2e-05	3.92e-06	0	0	0	2.64e-06	0	7.44e-06	0	1.93e-05	4.87e-06	4.39e-06	0	3.04e-06	6.76e-06	2.37e-05	5.42e-05	0	0	0	0	0	0.000144	0	1.86e-07	0	9.1e-08	2.16e-07	0	0	0	0	0	0	6.87e-06	7.74e-06	1.11e-06
Cellular Processes	Cell motility	02040 Flagellar assembly [PATH:ko02040]	fliR-flhB; flagellar biosynthetic protein FliR/FlhB	K13820	Flagellum	0	3.55e-07	0	0	0	0	0	7.21e-06	3.92e-06	5.2e-06	3.76e-06	4.32e-06	2.64e-06	3.87e-06	2.48e-06	0	3.05e-06	3.57e-06	3.29e-06	5.73e-06	5.84e-06	5.07e-06	6.59e-06	0	0	0	0	0	0	0	0	2.61e-06	2.1e-06	2.68e-06	2.97e-06	5.71e-06	5.41e-06	5.64e-06	9.56e-06	0	0	0	1.29e-06	2.23e-06
Cellular Processes	Cell motility	02040 Flagellar assembly [PATH:ko02040]	flhD; flagellar transcriptional activator FlhD	K02403	Flagellum	1.14e-06	2.13e-06	7.64e-06	4.81e-06	2.99e-06	5.63e-06	4.86e-06	2.4e-06	1.96e-05	1.56e-05	0	8.64e-06	7.92e-06	7.75e-06	2.98e-05	2.54e-05	1.83e-05	8.12e-06	1.75e-05	1.15e-05	1.31e-05	1.18e-05	5.01e-05	0.00025	0	0	0	0	0	0	0	1.86e-07	0	3.64e-07	8.1e-07	0	0	0	6.38e-06	5.55e-06	0	1.37e-05	1.16e-05	7.79e-06
Cellular Processes	Cell motility	02040 Flagellar assembly [PATH:ko02040]	fliOZ, fliO; flagellar protein FliO/FliZ	K02418	Flagellum	3.42e-06	4.25e-06	6.9e-06	2.51e-06	5.98e-06	5.99e-06	7.02e-06	7.21e-06	7.83e-06	1.3e-05	2.63e-05	1.94e-05	1.85e-05	3.1e-05	2.73e-05	1.15e-05	2.85e-05	2.92e-05	2.85e-05	2.44e-05	3.01e-05	1.69e-05	0.000119	0.000176	0	0	0	0	0	0	0	6.53e-07	1.11e-06	7.73e-07	6.48e-07	5.71e-06	2.71e-06	5.64e-06	1.28e-05	0	3.73e-06	8.46e-06	0	1.22e-05
Cellular Processes	Cell motility	02040 Flagellar assembly [PATH:ko02040]	flgA; flagella basal body P-ring formation protein FlgA	K02386	Flagellum	3.42e-06	5.67e-06	6.65e-06	5.44e-06	7.69e-06	7.08e-06	5.94e-06	2.4e-05	7.83e-06	1.82e-05	2.63e-05	6.48e-06	0	0	4.96e-06	1.62e-05	5.4e-05	1.79e-05	2.74e-05	3.29e-05	1.99e-05	4.4e-05	0.000111	0.000227	0	0	0	0	0	0	0	1.12e-06	9.9e-07	2.18e-06	1.08e-06	0	1.35e-05	1.13e-05	2.55e-05	0	7.46e-06	1.9e-05	2.45e-05	1.45e-05
Environmental Information Processing	Signal transduction	02020 Two-component system [PATH:ko02020]	flrB, fleS; two-component system, sensor histidine kinase FlrB [EC:2.7.13.3]	K10942	Flagellum	3.42e-06	7.09e-07	3.94e-06	3.56e-06	5.13e-06	7.27e-07	6.21e-06	9.61e-06	1.17e-05	1.3e-05	1.5e-05	1.3e-05	1.58e-05	3.87e-06	4.96e-06	4.62e-06	1.43e-05	1.72e-05	2.74e-05	1.86e-05	1.38e-05	2.71e-05	0.000159	0.000235	0	0	0	0	9.83e-05	7.2e-05	0.000219	1.68e-06	3.1e-06	2.23e-06	2.38e-06	1.43e-05	1.35e-05	6.77e-05	6.38e-05	1.11e-05	0	2.01e-05	1.94e-05	2.11e-05
Cellular Processes	Cell motility	02040 Flagellar assembly [PATH:ko02040]	flhC; flagellar transcriptional activator FlhC	K02402	Flagellum	2.8e-05	4.08e-05	3.13e-05	3.18e-05	3.93e-05	2.71e-05	2.75e-05	1.92e-05	1.96e-05	1.04e-05	1.88e-05	0	7.92e-06	0	2.23e-05	2.08e-05	3.26e-05	1.46e-05	2.08e-05	1.58e-05	2.17e-05	2.87e-05	7.77e-05	0.000223	0	0	0	0	4.92e-05	0	0	1.86e-07	4.95e-07	5.91e-07	7.56e-07	0	8.12e-06	0	0	8.32e-06	0	2.38e-05	1.29e-05	4.12e-05
Cellular Processes	Cell motility	02040 Flagellar assembly [PATH:ko02040]	flgF; flagellar basal-body rod protein FlgF	K02391	Flagellum	1.94e-05	1.84e-05	1.77e-05	1.74e-05	1.28e-05	2.05e-05	1.97e-05	5.29e-05	5.48e-05	2.86e-05	4.13e-05	1.51e-05	2.64e-05	1.16e-05	5.46e-05	5.08e-05	0.000156	9.19e-05	6.69e-05	7.45e-05	6.89e-05	8.96e-05	0.000259	0.000373	0	0	0	0	0	7.2e-05	4.38e-05	7.74e-06	1.51e-05	1.54e-05	1.87e-05	4.56e-05	6.76e-05	0.000175	7.01e-05	6.94e-05	4.85e-05	6.03e-05	5.16e-05	8.57e-05
Cellular Processes	Cell motility	02040 Flagellar assembly [PATH:ko02040]	fliE; flagellar hook-basal body complex protein FliE	K02408	Flagellum	1.37e-05	8.51e-06	1.06e-05	7.74e-06	1.3e-05	1.11e-05	1.08e-05	9.61e-05	8.61e-05	6.77e-05	6.39e-05	9.29e-05	8.72e-05	6.59e-05	8.43e-05	8.54e-05	9.77e-05	8.51e-05	7.57e-05	0.000105	8.69e-05	0.000132	0.000109	0.000184	0	0	0	0	2.46e-05	0	0	2.72e-05	3.07e-05	4.07e-05	4.29e-05	9.98e-05	0.000127	0.000135	7.01e-05	5.27e-05	0.000123	4.18e-05	2.71e-05	5.23e-05
Cellular Processes	Cell motility	02040 Flagellar assembly [PATH:ko02040]	flgD; flagellar basal-body rod modification protein FlgD	K02389	Flagellum	2.11e-05	1.74e-05	2.51e-05	1.86e-05	1.82e-05	1.13e-05	1.48e-05	6.97e-05	7.05e-05	5.72e-05	5.26e-05	0.000149	7.66e-05	0.00017	0.000117	0.000127	0.000118	9.71e-05	8.12e-05	0.000112	9.74e-05	9.64e-05	0.000184	0.000236	0	0	0	0	0	7.2e-05	0.000175	3.91e-05	5.43e-05	5.63e-05	5.54e-05	0.000211	0.000149	0.000135	0.000153	0.000142	0.000216	5.6e-05	6.71e-05	7.23e-05
Cellular Processes	Cell motility	02040 Flagellar assembly [PATH:ko02040]	fliQ; flagellar biosynthetic protein FliQ	K02420	Flagellum	3.42e-05	2.2e-05	2.69e-05	1.59e-05	3.61e-05	1.91e-05	5.88e-05	8.89e-05	8.61e-05	0.00013	0.00012	0.000173	0.000106	0.000143	0.000104	9e-05	9.67e-05	8.93e-05	0.000129	0.000116	0.000124	0.00011	0.000138	0.000154	0.000354	0	0	9.41e-05	2.46e-05	0	0	3.44e-05	4.59e-05	4.73e-05	4.73e-05	7.7e-05	0.000143	6.77e-05	0.000121	0.000108	0.000205	8.09e-05	7.1e-05	7.68e-05
Cellular Processes	Cell motility	02040 Flagellar assembly [PATH:ko02040]	flgB; flagellar basal-body rod protein FlgB	K02387	Flagellum	1.77e-05	2.87e-05	1.43e-05	1.07e-05	1.77e-05	2.25e-05	1.51e-05	0.000101	6.27e-05	0.00012	9.02e-05	0.00011	7.13e-05	8.91e-05	0.000151	0.000106	0.000131	0.000115	0.000107	0.000109	0.000121	0.000115	0.000173	0.000207	3.37e-05	0	0	0	7.37e-05	0	0	5.16e-05	6.36e-05	7.13e-05	7.84e-05	0.000214	0.000157	0.000135	0.00014	8.88e-05	0.000224	5.02e-05	5.16e-05	5.56e-05
Cellular Processes	Cell motility	02040 Flagellar assembly [PATH:ko02040]	flgH; flagellar L-ring protein precursor FlgH	K02393	Flagellum	5.25e-05	4.93e-05	5.55e-05	3.52e-05	3.27e-05	5.63e-05	3.7e-05	5.77e-05	6.66e-05	1.82e-05	7.14e-05	3.02e-05	5.28e-05	2.71e-05	7.69e-05	5.08e-05	0.000115	9.77e-05	8.99e-05	0.000113	8.97e-05	0.000157	0.000205	0.000368	0	0	0	0	0	0.000144	0.000351	3.98e-05	6.47e-05	6.51e-05	6e-05	0.000151	0.000122	0.000209	0.000105	0.000136	0.000157	9.46e-05	7.49e-05	0.000107
Cellular Processes	Cell motility	02040 Flagellar assembly [PATH:ko02040]	fliR; flagellar biosynthetic protein FliR	K02421	Flagellum	1.6e-05	2.48e-05	9.14e-05	2.22e-05	1.71e-05	3.11e-05	3.27e-05	8.89e-05	0.000117	0.00012	0.000135	0.000151	6.6e-05	0.000147	9.42e-05	0.00012	0.000211	0.000155	0.000169	0.000173	0.000169	0.000206	0.000242	0.000333	1.69e-05	0	0	0	0	7.2e-05	0.000219	3.8e-05	4.73e-05	5.33e-05	6.17e-05	0.00018	0.000187	7.34e-05	0.000137	0.000158	0.000287	7.4e-05	5.42e-05	0.000101
Cellular Processes	Cell motility	02040 Flagellar assembly [PATH:ko02040]	flgK; flagellar hook-associated protein 1 FlgK	K02396	Flagellum	7.99e-06	1.6e-05	2.29e-05	1.23e-05	1.79e-05	2.11e-05	1.84e-05	0.000219	0.000157	0.000195	0.000188	0.000236	0.00023	0.000213	0.000174	0.000249	0.000244	0.000254	0.000224	0.000285	0.000263	0.000203	0.000499	0.00077	0	0.000202	0	3.14e-05	7.37e-05	0.000144	0	4.26e-05	5.71e-05	5.54e-05	6.3e-05	0.000143	0.000195	0.000181	0.000258	0.000211	0.000336	0.000124	0.000128	0.000171
Cellular Processes	Cell motility	02030 Bacterial chemotaxis [PATH:ko02030]	fliNY, fliN; flagellar motor switch protein FliN/FliY	K02417	Flagellum	4.85e-05	4.54e-05	6.24e-05	6.01e-05	4.27e-05	4.05e-05	5.05e-05	0.00012	0.000176	0.000167	0.00015	0.000162	0.000137	0.000143	0.000176	0.000129	0.000192	0.00017	0.000195	0.000208	0.000195	0.000184	0.000246	0.000199	0	0	0	3.14e-05	2.46e-05	0	0	5.54e-05	7.81e-05	8.05e-05	9.51e-05	0.000108	0.00016	0.000135	0.000179	0.000153	0.00016	8.46e-05	6.97e-05	0.000106
Cellular Processes	Cell motility	02040 Flagellar assembly [PATH:ko02040]	flgC; flagellar basal-body rod protein FlgC	K02388	Flagellum	2.91e-05	6.31e-05	5.96e-05	6.61e-05	6.9e-05	4.58e-05	6.13e-05	8.89e-05	0.000129	0.000159	0.000113	0.000143	0.000188	0.000147	0.000188	0.000138	0.000207	0.000184	0.000186	0.000231	0.000225	0.000169	0.0002	0.00023	1.69e-05	0	0	0	2.46e-05	0	4.38e-05	5.12e-05	8.64e-05	8.35e-05	9.8e-05	0.000123	0.000227	0.000192	0.000169	0.000142	0.000227	0.000125	9.94e-05	0.000118
Environmental Information Processing	Signal transduction	02020 Two-component system [PATH:ko02020]	flrA; sigma-54 specific transcriptional regulator, flagellar regulatory protein A	K10941	Flagellum	2.68e-05	2.8e-05	2.93e-05	2.43e-05	2.71e-05	4.63e-05	2.62e-05	1.68e-05	6.66e-05	2.6e-05	7.14e-05	3.46e-05	2.64e-05	1.55e-05	5.95e-05	2.54e-05	7.64e-05	6.92e-05	5.26e-05	8.02e-05	4.81e-05	5.58e-05	0.000205	0.000337	0	0	0	0	0	0.000144	0.000219	8.71e-05	0.00012	0.000113	0.000126	0.000183	0.000344	0.000299	0.000258	0.000253	0.000377	0.000186	0.000186	0.000179
Environmental Information Processing	Signal transduction	02020 Two-component system [PATH:ko02020]	flrC, fleR; two component system, response regulator FlrC	K10943	Flagellum	3.99e-06	9.57e-06	5.42e-06	4.6e-06	2.78e-05	1.49e-05	5.94e-06	2.4e-05	1.17e-05	3.64e-05	4.88e-05	1.3e-05	1.85e-05	1.94e-05	2.48e-05	3.23e-05	6.11e-05	7.73e-05	7.9e-05	8.88e-05	5.33e-05	8.12e-05	0.000298	0.000373	0	0	0	6.28e-05	2.46e-05	0	0.000132	9.22e-05	0.00012	0.000137	0.000145	0.000211	0.000349	0.000237	0.000198	0.000308	0.000447	0.0002	0.00019	0.000218
Cellular Processes	Cell motility	02040 Flagellar assembly [PATH:ko02040]	fliF; flagellar M-ring protein FliF	K02409	Flagellum	2.57e-05	3.16e-05	3.89e-05	2.51e-05	4.27e-05	5.94e-05	3.64e-05	0.000185	0.000243	0.000167	0.000192	0.000188	0.000164	0.000167	0.000206	0.000215	0.000369	0.000314	0.00034	0.000365	0.000319	0.00036	0.000489	0.000819	3.37e-05	0	2.39e-05	0	7.37e-05	0.000144	0.000132	9.31e-05	0.000137	0.000122	0.000139	0.000282	0.000476	0.000339	0.000261	0.000347	0.000377	0.000151	0.000141	0.000185
Cellular Processes	Cell motility	02030 Bacterial chemotaxis [PATH:ko02030]	fliM; flagellar motor switch protein FliM	K02416	Flagellum	0.000153	0.000142	0.000161	0.000152	0.000145	0.000181	0.000132	0.000173	0.000137	0.000174	0.000165	0.000177	0.000177	0.000201	0.000166	0.000164	0.000285	0.000197	0.000215	0.000287	0.000214	0.000237	0.000337	0.000365	0	0	0	0.000126	0	0.000216	0.000132	8.69e-05	0.000119	0.000105	0.000128	0.000242	0.000254	0.000198	0.00023	0.000155	0.000306	0.000157	0.000191	0.000171
Cellular Processes	Cell motility	02040 Flagellar assembly [PATH:ko02040]	flhB; flagellar biosynthetic protein FlhB	K02401	Flagellum	1.6e-05	4.68e-05	4.29e-05	8.96e-05	4.36e-05	4.36e-05	6.94e-05	0.000197	0.00018	0.000211	0.000304	0.000212	0.000225	0.000263	0.000241	0.000319	0.000366	0.000278	0.000382	0.000421	0.000362	0.000445	0.000424	0.000645	0	0	0	0.000188	0	7.2e-05	8.77e-05	0.000106	0.000151	0.000138	0.000162	0.000337	0.000457	0.000305	0.0003	0.000264	0.00041	0.000168	0.000141	0.000228
Cellular Processes	Cell motility	02040 Flagellar assembly [PATH:ko02040]	fliP; flagellar biosynthetic protein FliP	K02419	Flagellum	7.24e-05	0.000132	0.000109	0.000135	0.00017	0.000199	0.000153	0.000161	0.000133	0.000161	0.00018	0.000231	0.000177	0.000178	0.000231	0.00024	0.000305	0.000282	0.000308	0.000311	0.00031	0.000314	0.000294	0.000409	0.000101	0	0	0.000188	0	0	0.000175	0.000104	0.000147	0.000149	0.000171	0.000262	0.000492	0.000327	0.000293	0.000286	0.000395	0.000209	0.000239	0.000192
Cellular Processes	Cell motility	02040 Flagellar assembly [PATH:ko02040]	flgG; flagellar basal-body rod protein FlgG	K02392	Flagellum	7.36e-05	9.79e-05	0.000134	0.000136	0.000118	0.000125	9.72e-05	0.000221	0.000129	0.000216	0.000139	0.000106	0.000103	8.52e-05	0.000112	0.000159	0.000303	0.000266	0.000268	0.000304	0.00022	0.000267	0.000391	0.000396	0	0	0	9.41e-05	0	0	8.77e-05	0.00015	0.000212	0.000196	0.000224	0.000311	0.000428	0.000468	0.000398	0.000419	0.000578	0.00021	0.000212	0.000218
Cellular Processes	Cell motility	02040 Flagellar assembly [PATH:ko02040]	flgI; flagellar P-ring protein precursor FlgI	K02394	Flagellum	0.000105	5.64e-05	0.00012	0.000102	8.16e-05	0.000112	5.86e-05	0.00012	0.000129	0.00013	0.000165	5.62e-05	3.7e-05	3.87e-05	0.000134	0.000138	0.000333	0.000217	0.000303	0.000268	0.0002	0.000186	0.000408	0.000552	0	0	0	6.28e-05	4.92e-05	0.000144	4.38e-05	0.000185	0.000268	0.000242	0.000278	0.000582	0.000628	0.000587	0.000497	0.000627	0.000712	0.000237	0.000231	0.000283
Cellular Processes	Cell motility	02030 Bacterial chemotaxis [PATH:ko02030]	motA; chemotaxis protein MotA	K02556	Flagellum	0.000243	0.00026	0.000222	0.000242	0.000222	0.000247	0.000206	0.000202	0.000137	0.000172	0.000188	0.000179	0.000219	0.000217	0.000226	0.000339	0.000369	0.000324	0.000337	0.000381	0.000344	0.000384	0.000477	0.000772	0	0	9.56e-05	9.41e-05	2.46e-05	0	8.77e-05	0.000129	0.000193	0.000185	0.000204	0.000471	0.000414	0.000485	0.000328	0.000277	0.000362	0.000187	0.000183	0.000247
Cellular Processes	Cell motility	02030 Bacterial chemotaxis [PATH:ko02030]	fliG; flagellar motor switch protein FliG	K02401	Flagellum	0.000257	0.000243	0.000148	0.000204	0.000182	0.000224	0.000154	0.000202	0.000282	0.000276	0.000252	0.000274	0.000277	0.000298	0.000268	0.000349	0.000366	0.00034	0.000312	0.000385	0.000353	0.000306	0.000432	0.000532	0	3.36e-05	0	0	4.92e-05	0.000144	4.38e-05	0.000155	0.00021	0.000211	0.000229	0.000471	0.00053	0.000378	0.000312	0.000466	0.000529	0.000229	0.00019	0.000273
Cellular Processes	Cell motility	02040 Flagellar assembly [PATH:ko02040]	flgE; flagellar hook protein FlgE	K02390	Flagellum	2.17e-05	3.65e-05	3.55e-05	2.57e-05	3.67e-05	5.54e-05	3.1e-05	0.000272	0.000215	0.000234	0.000222	0.000264	0.000269	0.000302	0.000355	0.000362	0.000356	0.000336	0.000365	0.000395	0.000344	0.000414	0.00046	0.000722	0	0	0	3.14e-05	0	7.2e-05	0.000219	0.000204	0.000297	0.000283	0.000321	0.000505	0.000695	0.000497	0.000485	0.000641	0.000701	0.000203	0.000249	0.000244
Cellular Processes	Cell motility	02030 Bacterial chemotaxis [PATH:ko02030]	motB; chemotaxis protein MotB	K02557	Flagellum	0.000104	0.000122	0.000136	0.000101	0.000113	0.000126	0.000116	0.000245	0.000329	0.000317	0.000304	0.000268	0.000283	0.000267	0.000479	0.000409	0.000616	0.000416	0.000475	0.000494	0.000443	0.00045	0.000689	0.000949	0	0	0	0.000188	0	0	8.77e-05	0.000225	0.000289	0.000338	0.000343	0.00111248	0.000828	0.000841	0.000918	0.000613	0.00110355	0.00035	0.000328	0.000374
Cellular Processes	Cell motility	02040 Flagellar assembly [PATH:ko02040]	fliC; flagellin	K02406	Flagellum	5.93e-05	8.58e-05	9.49e-05	7.51e-05	5.53e-05	7.59e-05	5.56e-05	0.000389	0.000298	0.000328	0.000349	0.00038	0.000394	0.000496	0.000471	0.000427	0.000487	0.000458	0.000469	0.000501	0.000475	0.000563	0.000537	0.00056	5.06e-05	0	0	0.000157	0	7.2e-05	0.000219	0.000332	0.000516	0.000421	0.000485	0.000522	0.000817	0.000818	0.000771	0.00113493	0.00085	0.000312	0.000351	0.000385
Cellular Processes	Cell motility	02040 Flagellar assembly [PATH:ko02040]	flhA; flagellar biosynthesis protein FlhA	K02400	Flagellum	0.000188	0.000444	0.000406	0.000409	0.000371	0.000431	0.000277	0.000387	0.000372	0.000476	0.000526	0.000622	0.000586	0.000786	0.000588	0.000688	0.00092	0.000827	0.000891	0.000938	0.000898	0.00085	0.000929	0.0010624	0.000152	0	0	0.00022	4.92e-05	0.000432	8.77e-05	0.000276	0.000419	0.000377	0.000447	0.000739	0.000988	0.0010948	0.000775	0.000827	0.000906	0.000563	0.000583	0.00065
Genetic Information Processing	Transcription	03020 RNA polymerase [PATH:ko03020]	fliA; RNA polymerase sigma factor for flagellar operon FliA	K02405	Flagellum	0.00145522	0.00150253	0.00136374	0.00155015	0.00149854	0.00145984	0.00113734	0.00320092	0.00368864	0.005384	0.00475201	0.00891229	0.00895421	0.00888603	0.00701475	0.00687406	0.00499661	0.00483248	0.00525163	0.00410431	0.00629336	0.00407129	0.00423618	0.00579802	6.75e-05	0.000151	0	0.000471	0.000442	0.000792	0.0016221	0.000246	0.000252	0.000333	0.000368	0.0021622	0.000917	0.00246048	0.00277673	0.000697	0.00101781	0.00772697	0.007347	0.00722056
[truncated: 9 more columns]
