# Supplementary material for: The Biogeography of Dust in the Eastern Mediterranean
Source: Research Square preprint supplement (doi:10.21203/rs.3.rs-149876/v1), 2021-01-25
Supplement: Supplementary file 6 [file 3fd198790a2e5b2439c45d68.xlsx]

## Sheet: Sheet1
Genus	Rs	q-value	Domain	Phylum	Cluster
Acaryochloris	0.95	0.00112755	Bacteria	Cyanobacteria	1
Achromobacter	0.783333	0.0405695	Bacteria	Proteobacteria	1
Acidimicrobium	0.916667	0.00410313	Bacteria	Actinobacteria	1
Acidiphilium	0.9	0.00649687	Bacteria	Proteobacteria	1
Acidithiobacillus	0.9	0.00649687	Bacteria	Proteobacteria	1
Acidobacterium	0.916667	0.00410313	Bacteria	Acidobacteria	1
Acidothermus	0.983333	7.43385e-05	Bacteria	Actinobacteria	1
Actinosynnema	0.95	0.00112755	Bacteria	Actinobacteria	1
Aeromicrobium	0.9	0.00649687	Bacteria	Actinobacteria	1
Aeromonas	0.783333	0.0405695	Bacteria	Proteobacteria	1
Afipia	0.866667	0.0132262	Bacteria	Proteobacteria	1
Agrobacterium	0.833333	0.0222483	Bacteria	Proteobacteria	1
Alcanivorax	0.766667	0.0475434	Bacteria	Proteobacteria	1
Alicyclobacillus	0.916667	0.00410313	Bacteria	Firmicutes	1
Alkalilimnicola	0.85	0.0176117	Bacteria	Proteobacteria	1
Allochromatium	0.866667	0.0132262	Bacteria	Proteobacteria	1
Amycolatopsis	0.95	0.00112755	Bacteria	Actinobacteria	1
Anabaena	0.783333	0.0405695	Bacteria	Cyanobacteria	1
Anaeromyxobacter	0.966667	0.000403225	Bacteria	Proteobacteria	1
Aromatoleum	0.933333	0.00232264	Bacteria	Proteobacteria	1
Arthrobacter	0.95	0.00112755	Bacteria	Actinobacteria	1
Arthrospira	0.816667	0.0277816	Bacteria	Cyanobacteria	1
Aurantimonas	0.883333	0.00957457	Bacteria	Proteobacteria	1
Azoarcus	0.85	0.0176117	Bacteria	Proteobacteria	1
Azorhizobium	0.9	0.00649687	Bacteria	Proteobacteria	1
Azospirillum	0.916667	0.00410313	Bacteria	Proteobacteria	1
Azotobacter	0.85	0.0176117	Bacteria	Proteobacteria	1
Bartonella	0.9	0.00649687	Bacteria	Proteobacteria	1
Beijerinckia	0.9	0.00649687	Bacteria	Proteobacteria	1
Beutenbergia	0.783333	0.0405695	Bacteria	Actinobacteria	1
Blastopirellula	0.95	0.00112755	Bacteria	Planctomycetes	1
Bordetella	0.833333	0.0222483	Bacteria	Proteobacteria	1
Bradyrhizobium	0.9	0.00649687	Bacteria	Proteobacteria	1
Brucella	0.866667	0.0132262	Bacteria	Proteobacteria	1
Burkholderia	0.883333	0.00957457	Bacteria	Proteobacteria	1
Candidatus Accumulibacter	0.85	0.0176117	Bacteria	Proteobacteria	1
Candidatus Koribacter	0.916667	0.00410313	Bacteria	Acidobacteria	1
Candidatus Pelagibacter	0.883333	0.00957457	Bacteria	Proteobacteria	1
Candidatus Puniceispirillum	0.916667	0.00410313	Bacteria	Proteobacteria	1
Candidatus Solibacter	0.883333	0.00957457	Bacteria	Acidobacteria	1
Carboxydothermus	0.866667	0.0132262	Bacteria	Firmicutes	1
Catenulispora	0.95	0.00112755	Bacteria	Actinobacteria	1
Caulobacter	0.85	0.0176117	Bacteria	Proteobacteria	1
Cellulomonas	0.9	0.00649687	Bacteria	Actinobacteria	1
Chelativorans	0.9	0.00649687	Bacteria	Proteobacteria	1
Chlorobaculum	0.866667	0.0132262	Bacteria	Chlorobi	1
Chloroflexus	0.933333	0.00232264	Bacteria	Chloroflexi	1
Chthoniobacter	0.966667	0.000403225	Bacteria	Verrucomicrobia	1
Citreicella	0.816667	0.0277816	Bacteria	Proteobacteria	1
Clavibacter	0.8	0.033885	Bacteria	Actinobacteria	1
Conexibacter	0.966667	0.000403225	Bacteria	Actinobacteria	1
Congregibacter	0.8	0.033885	Bacteria	Proteobacteria	1
Coraliomargarita	0.866667	0.0132262	Bacteria	Verrucomicrobia	1
Cupriavidus	0.866667	0.0132262	Bacteria	Proteobacteria	1
Cyanothece	0.816667	0.0277816	Bacteria	Cyanobacteria	1
Dechloromonas	0.766667	0.0475434	Bacteria	Proteobacteria	1
Dehalococcoides	0.9	0.00649687	Bacteria	Chloroflexi	1
Desulfatibacillum	0.966667	0.000403225	Bacteria	Proteobacteria	1
Desulfotomaculum	0.833333	0.0222483	Bacteria	Firmicutes	1
Desulfovibrio	0.916667	0.00410313	Bacteria	Proteobacteria	1
Dinoroseobacter	0.9	0.00649687	Bacteria	Proteobacteria	1
Frankia	0.966667	0.000403225	Bacteria	Actinobacteria	1
Gemmata	0.966667	0.000403225	Bacteria	Planctomycetes	1
Gemmatimonas	0.833333	0.0222483	Bacteria	Gemmatimonadetes	1
Geobacter	0.933333	0.00232264	Bacteria	Proteobacteria	1
Geodermatophilus	0.933333	0.00232264	Bacteria	Actinobacteria	1
Gloeobacter	0.966667	0.000403225	Bacteria	Cyanobacteria	1
Gluconacetobacter	0.9	0.00649687	Bacteria	Proteobacteria	1
Gluconobacter	0.883333	0.00957457	Bacteria	Proteobacteria	1
Granulibacter	0.85	0.0176117	Bacteria	Proteobacteria	1
Hahella	0.816667	0.0277816	Bacteria	Proteobacteria	1
Haliangium	0.933333	0.00232264	Bacteria	Proteobacteria	1
Halorhodospira	0.966667	0.000403225	Bacteria	Proteobacteria	1
Herpetosiphon	0.933333	0.00232264	Bacteria	Chloroflexi	1
Hoeflea	0.9	0.00649687	Bacteria	Proteobacteria	1
Hyphomicrobium	0.8	0.033885	Bacteria	Proteobacteria	1
Hyphomonas	0.866667	0.0132262	Bacteria	Proteobacteria	1
Jannaschia	0.916667	0.00410313	Bacteria	Proteobacteria	1
Ketogulonicigenium	0.866667	0.0132262	Bacteria	Proteobacteria	1
Kineococcus	0.966667	0.000403225	Bacteria	Actinobacteria	1
Kribbella	0.95	0.00112755	Bacteria	Actinobacteria	1
Ktedonobacter	0.966667	0.000403225	Bacteria	Chloroflexi	1
Labrenzia	0.933333	0.00232264	Bacteria	Proteobacteria	1
Loktanella	0.883333	0.00957457	Bacteria	Proteobacteria	1
Lyngbya	0.783333	0.0405695	Bacteria	Cyanobacteria	1
Magnetococcus	0.883333	0.00957457	Bacteria	Proteobacteria	1
Magnetospirillum	0.933333	0.00232264	Bacteria	Proteobacteria	1
Maricaulis	0.866667	0.0132262	Bacteria	Proteobacteria	1
Maritimibacter	0.883333	0.00957457	Bacteria	Proteobacteria	1
Meiothermus	0.916667	0.00410313	Bacteria	Deinococcus-Thermus	1
Methanosarcina	0.883333	0.00957457	Archaea	Euryarchaeota	1
Methylobacterium	0.9	0.00649687	Bacteria	Proteobacteria	1
Methylocella	0.933333	0.00232264	Bacteria	Proteobacteria	1
Methylococcus	0.9	0.00649687	Bacteria	Proteobacteria	1
Methylosinus	0.933333	0.00232264	Bacteria	Proteobacteria	1
Microcoleus	0.783333	0.0405695	Bacteria	Cyanobacteria	1
Microcystis	0.9	0.00649687	Bacteria	Cyanobacteria	1
Micromonospora	0.966667	0.000403225	Bacteria	Actinobacteria	1
Moorella	0.95	0.00112755	Bacteria	Firmicutes	1
Mycobacterium	0.866667	0.0132262	Bacteria	Actinobacteria	1
Myxococcus	0.933333	0.00232264	Bacteria	Proteobacteria	1
Nakamurella	0.966667	0.000403225	Bacteria	Actinobacteria	1
Nitrobacter	0.866667	0.0132262	Bacteria	Proteobacteria	1
Nitrococcus	0.933333	0.00232264	Bacteria	Proteobacteria	1
Nitrosococcus	0.933333	0.00232264	Bacteria	Proteobacteria	1
Nitrosopumilus	0.933333	0.00232264	Archaea	Thaumarchaeota	1
Nitrospira	0.883333	0.00957457	Bacteria	Nitrospirae	1
Nocardia	0.9	0.00649687	Bacteria	Actinobacteria	1
Nocardioides	0.95	0.00112755	Bacteria	Actinobacteria	1
Nocardiopsis	0.766667	0.0475434	Bacteria	Actinobacteria	1
Nostoc	0.783333	0.0405695	Bacteria	Cyanobacteria	1
Oceanicaulis	0.8	0.033885	Bacteria	Proteobacteria	1
Oceanicola	0.9	0.00649687	Bacteria	Proteobacteria	1
Ochrobactrum	0.9	0.00649687	Bacteria	Proteobacteria	1
Octadecabacter	0.883333	0.00957457	Bacteria	Proteobacteria	1
Oligotropha	0.916667	0.00410313	Bacteria	Proteobacteria	1
Opitutus	0.866667	0.0132262	Bacteria	Verrucomicrobia	1
Oscillatoria	0.8	0.033885	Bacteria	Cyanobacteria	1
Oscillochloris	0.933333	0.00232264	Bacteria	Chloroflexi	1
Parvibaculum	0.883333	0.00957457	Bacteria	Proteobacteria	1
Pelagibaca	0.816667	0.0277816	Bacteria	Proteobacteria	1
Pelobacter	0.916667	0.00410313	Bacteria	Proteobacteria	1
Pelodictyon	0.866667	0.0132262	Bacteria	Chlorobi	1
Pelotomaculum	0.916667	0.00410313	Bacteria	Firmicutes	1
Phenylobacterium	0.816667	0.0277816	Bacteria	Proteobacteria	1
Pirellula	0.95	0.00112755	Bacteria	Planctomycetes	1
Planctomyces	0.95	0.00112755	Bacteria	Planctomycetes	1
Plesiocystis	0.916667	0.00410313	Bacteria	Proteobacteria	1
Prochlorococcus	0.866667	0.0132262	Bacteria	Cyanobacteria	1
Pseudovibrio	0.916667	0.00410313	Bacteria	Proteobacteria	1
Renibacterium	0.95	0.00112755	Bacteria	Actinobacteria	1
Rhizobium	0.9	0.00649687	Bacteria	Proteobacteria	1
Rhodobacter	0.783333	0.0405695	Bacteria	Proteobacteria	1
Rhodococcus	0.866667	0.0132262	Bacteria	Actinobacteria	1
Rhodomicrobium	0.9	0.00649687	Bacteria	Proteobacteria	1
Rhodopirellula	0.95	0.00112755	Bacteria	Planctomycetes	1
Rhodopseudomonas	0.916667	0.00410313	Bacteria	Proteobacteria	1
Rhodospirillum	0.933333	0.00232264	Bacteria	Proteobacteria	1
Rhodothermus	0.85	0.0176117	Bacteria	Bacteroidetes	1
Roseibium	0.933333	0.00232264	Bacteria	Proteobacteria	1
Roseiflexus	0.933333	0.00232264	Bacteria	Chloroflexi	1
Roseobacter	0.85	0.0176117	Bacteria	Proteobacteria	1
Roseomonas	0.85	0.0176117	Bacteria	Proteobacteria	1
Roseovarius	0.85	0.0176117	Bacteria	Proteobacteria	1
Rubrobacter	0.933333	0.00232264	Bacteria	Actinobacteria	1
Ruegeria	0.833333	0.0222483	Bacteria	Proteobacteria	1
Saccharomonospora	0.85	0.0176117	Bacteria	Actinobacteria	1
Saccharopolyspora	0.95	0.00112755	Bacteria	Actinobacteria	1
Sagittula	0.8	0.033885	Bacteria	Proteobacteria	1
Salinibacter	0.816667	0.0277816	Bacteria	Bacteroidetes	1
Salinispora	0.966667	0.000403225	Bacteria	Actinobacteria	1
Sanguibacter	0.866667	0.0132262	Bacteria	Actinobacteria	1
Sinorhizobium	0.9	0.00649687	Bacteria	Proteobacteria	1
Sorangium	0.966667	0.000403225	Bacteria	Proteobacteria	1
Sphaerobacter	0.95	0.00112755	Bacteria	Chloroflexi	1
Stackebrandtia	0.9	0.00649687	Bacteria	Actinobacteria	1
Starkeya	0.9	0.00649687	Bacteria	Proteobacteria	1
Stigmatella	0.883333	0.00957457	Bacteria	Proteobacteria	1
Streptomyces	0.9	0.00649687	Bacteria	Actinobacteria	1
Streptosporangium	0.95	0.00112755	Bacteria	Actinobacteria	1
Sulfitobacter	0.766667	0.0475434	Bacteria	Proteobacteria	1
Symbiobacterium	0.95	0.00112755	Bacteria	Firmicutes	1
Synechococcus	0.95	0.00112755	Bacteria	Cyanobacteria	1
Synechocystis	0.9	0.00649687	Bacteria	Cyanobacteria	1
Syntrophobacter	0.933333	0.00232264	Bacteria	Proteobacteria	1
Syntrophus	0.883333	0.00957457	Bacteria	Proteobacteria	1
Terriglobus	0.866667	0.0132262	Bacteria	Acidobacteria	1
Thermaerobacter	0.95	0.00112755	Bacteria	Firmicutes	1
Thermobaculum	0.933333	0.00232264	Bacteria	unclassified (derived from Bacteria)	1
Thermobifida	0.9	0.00649687	Bacteria	Actinobacteria	1
Thermobispora	0.95	0.00112755	Bacteria	Actinobacteria	1
Thermomicrobium	0.95	0.00112755	Bacteria	Chloroflexi	1
Thermomonospora	0.966667	0.000403225	Bacteria	Actinobacteria	1
Thermosynechococcus	0.916667	0.00410313	Bacteria	Cyanobacteria	1
Thermotoga	0.95	0.00112755	Bacteria	Thermotogae	1
Thermus	0.916667	0.00410313	Bacteria	Deinococcus-Thermus	1
Thioalkalivibrio	0.9	0.00649687	Bacteria	Proteobacteria	1
Trichodesmium	0.783333	0.0405695	Bacteria	Cyanobacteria	1
Truepera	0.783333	0.0405695	Bacteria	Deinococcus-Thermus	1
unclassified (derived from Alphaproteobacteria)	0.933333	0.00232264	Bacteria	Proteobacteria	1
unclassified (derived from Deltaproteobacteria)	0.9	0.00649687	Bacteria	Proteobacteria	1
unclassified (derived from Gammaproteobacteria)	0.8	0.033885	Bacteria	Proteobacteria	1
unclassified (derived from Rhodobacteraceae)	0.816667	0.0277816	Bacteria	Proteobacteria	1
unclassified (derived from Verrucomicrobia subdivision 3)	0.883333	0.00957457	Bacteria	Verrucomicrobia	1
Verminephrobacter	0.9	0.00649687	Bacteria	Proteobacteria	1
Verrucomicrobium	0.933333	0.00232264	Bacteria	Verrucomicrobia	1
Xanthobacter	0.9	0.00649687	Bacteria	Proteobacteria	1
Xylanimonas	0.783333	0.0405695	Bacteria	Actinobacteria	1
Acetobacter	0.85	0.0176117	Bacteria	Proteobacteria	2
Acetohalobium	0.783333	0.0405695	Bacteria	Firmicutes	2
Acidilobus	0.816667	0.0277816	Archaea	Crenarchaeota	2
Aciduliprofundum	0.883333	0.00957457	Archaea	Euryarchaeota	2
Aeropyrum	0.966667	0.000403225	Archaea	Crenarchaeota	2
Ahrensia	0.933333	0.00232264	Bacteria	Proteobacteria	2
Aminomonas	0.916667	0.00410313	Bacteria	Synergistetes	2
Ammonifex	0.95	0.00112755	Bacteria	Firmicutes	2
Anaerobaculum	0.883333	0.00957457	Bacteria	Synergistetes	2
Aquifex	0.866667	0.0132262	Bacteria	Aquificae	2
Archaeoglobus	0.95	0.00112755	Archaea	Euryarchaeota	2
Beggiatoa	0.85	0.0176117	Bacteria	Proteobacteria	2
Caldivirga	0.883333	0.00957457	Archaea	Crenarchaeota	2
Candidatus Cloacamonas	0.883333	0.00957457	Bacteria	unclassified (derived from Bacteria)	2
Candidatus Desulforudis	0.95	0.00112755	Bacteria	Firmicutes	2
Candidatus Korarchaeum	0.95	0.00112755	Archaea	Korarchaeota	2
Cenarchaeum	0.933333	0.00232264	Archaea	Thaumarchaeota	2
Chlamydia	0.9	0.00649687	Bacteria	Chlamydiae	2
Chlamydomonas	0.95	0.00112755	Eukaryota	Chlorophyta	2
Coxiella	0.8	0.033885	Bacteria	Proteobacteria	2
Crocosphaera	0.883333	0.00957457	Bacteria	Cyanobacteria	2
Cyanobium	0.883333	0.00957457	Bacteria	Cyanobacteria	2
Cylindrospermopsis	0.783333	0.0405695	Bacteria	Cyanobacteria	2
Deferribacter	0.766667	0.0475434	Bacteria	Deferribacteres	2
Dehalogenimonas	0.916667	0.00410313	Bacteria	Chloroflexi	2
Desulfarculus	0.966667	0.000403225	Bacteria	Proteobacteria	2
Desulfobacterium	0.766667	0.0475434	Bacteria	Proteobacteria	2
Desulfococcus	0.816667	0.0277816	Bacteria	Proteobacteria	2
Desulfohalobium	0.966667	0.000403225	Bacteria	Proteobacteria	2
Desulfomicrobium	0.833333	0.0222483	Bacteria	Proteobacteria	2
Desulfonatronospira	0.9	0.00649687	Bacteria	Proteobacteria	2
Desulfotalea	0.8	0.033885	Bacteria	Proteobacteria	2
Desulfurispirillum	0.833333	0.0222483	Bacteria	Chrysiogenetes	2
Desulfurivibrio	0.95	0.00112755	Bacteria	Proteobacteria	2
Desulfurococcus	0.966667	0.000403225	Archaea	Crenarchaeota	2
Desulfuromonas	0.766667	0.0475434	Bacteria	Proteobacteria	2
Dethiobacter	0.866667	0.0132262	Bacteria	Firmicutes	2
Dictyoglomus	0.816667	0.0277816	Bacteria	Dictyoglomi	2
Endoriftia	0.883333	0.00957457	Bacteria	Proteobacteria	2
Ferrimonas	0.783333	0.0405695	Bacteria	Proteobacteria	2
Ferroglobus	0.933333	0.00232264	Archaea	Euryarchaeota	2
Fervidobacterium	0.833333	0.0222483	Bacteria	Thermotogae	2
Fulvimarina	0.933333	0.00232264	Bacteria	Proteobacteria	2
Halalkalicoccus	0.983333	7.43385e-05	Archaea	Euryarchaeota	2
Halanaerobium	0.85	0.0176117	Bacteria	Firmicutes	2
Haloarcula	0.95	0.00112755	Archaea	Euryarchaeota	2
Halobacterium	0.95	0.00112755	Archaea	Euryarchaeota	2
Haloferax	0.933333	0.00232264	Archaea	Euryarchaeota	2
Halogeometricum	0.95	0.00112755	Archaea	Euryarchaeota	2
Halomicrobium	0.95	0.00112755	Archaea	Euryarchaeota	2
Haloquadratum	0.95	0.00112755	Archaea	Euryarchaeota	2
Halorhabdus	0.916667	0.00410313	Archaea	Euryarchaeota	2
Halorubrum	0.916667	0.00410313	Archaea	Euryarchaeota	2
Haloterrigena	0.95	0.00112755	Archaea	Euryarchaeota	2
Halothermothrix	0.866667	0.0132262	Bacteria	Firmicutes	2
Halothiobacillus	0.816667	0.0277816	Bacteria	Proteobacteria	2
Heliobacterium	0.866667	0.0132262	Bacteria	Firmicutes	2
Hydrogenivirga	0.85	0.0176117	Bacteria	Aquificae	2
Hydrogenobacter	0.766667	0.0475434	Bacteria	Aquificae	2
Hyperthermus	0.933333	0.00232264	Archaea	Crenarchaeota	2
Ignicoccus	0.933333	0.00232264	Archaea	Crenarchaeota	2
Ignisphaera	0.933333	0.00232264	Archaea	Crenarchaeota	2
Kosmotoga	0.816667	0.0277816	Bacteria	Thermotogae	2
Laribacter	0.766667	0.0475434	Bacteria	Proteobacteria	2
Lutiella	0.866667	0.0132262	Bacteria	Proteobacteria	2
Mariprofundus	0.9	0.00649687	Bacteria	Proteobacteria	2
Metallosphaera	0.95	0.00112755	Archaea	Crenarchaeota	2
Methanocaldococcus	0.833333	0.0222483	Archaea	Euryarchaeota	2
Methanocella	0.916667	0.00410313	Archaea	Euryarchaeota	2
Methanococcoides	0.883333	0.00957457	Archaea	Euryarchaeota	2
Methanoculleus	0.883333	0.00957457	Archaea	Euryarchaeota	2
Methanohalobium	0.85	0.0176117	Archaea	Euryarchaeota	2
Methanohalophilus	0.883333	0.00957457	Archaea	Euryarchaeota	2
Methanopyrus	0.933333	0.00232264	Archaea	Euryarchaeota	2
Methanoregula	0.883333	0.00957457	Archaea	Euryarchaeota	2
Methanosaeta	0.933333	0.00232264	Archaea	Euryarchaeota	2
Methanosphaerula	0.9	0.00649687	Archaea	Euryarchaeota	2
Methanospirillum	0.816667	0.0277816	Archaea	Euryarchaeota	2
Methanothermococcus	0.966667	0.000403225	Archaea	Euryarchaeota	2
Methanothermus	0.833333	0.0222483	Archaea	Euryarchaeota	2
Methylacidiphilum	0.916667	0.00410313	Bacteria	Verrucomicrobia	2
Natrialba	0.933333	0.00232264	Archaea	Euryarchaeota	2
Natronomonas	0.916667	0.00410313	Archaea	Euryarchaeota	2
Neorickettsia	0.783333	0.0405695	Bacteria	Proteobacteria	2
Neptuniibacter	0.833333	0.0222483	Bacteria	Proteobacteria	2
Oceanithermus	0.916667	0.00410313	Bacteria	Deinococcus-Thermus	2
Ostreococcus	0.8	0.033885	Eukaryota	Chlorophyta	2
Parachlamydia	0.8	0.033885	Bacteria	Chlamydiae	2
Parvularcula	0.866667	0.0132262	Bacteria	Proteobacteria	2
Persephonella	0.883333	0.00957457	Bacteria	Aquificae	2
Phaeobacter	0.766667	0.0475434	Bacteria	Proteobacteria	2
Picrophilus	0.866667	0.0132262	Archaea	Euryarchaeota	2
Pyrobaculum	0.983333	7.43385e-05	Archaea	Crenarchaeota	2
Pyrococcus	0.966667	0.000403225	Archaea	Euryarchaeota	2
Reinekea	0.766667	0.0475434	Bacteria	Proteobacteria	2
Segniliparus	0.8	0.033885	Bacteria	Actinobacteria	2
Staphylothermus	0.9	0.00649687	Archaea	Crenarchaeota	2
Sulfolobus	0.966667	0.000403225	Archaea	Crenarchaeota	2
Sulfurihydrogenibium	0.85	0.0176117	Bacteria	Aquificae	2
Syntrophothermus	0.95	0.00112755	Bacteria	Firmicutes	2
Thalassobium	0.9	0.00649687	Bacteria	Proteobacteria	2
Thermanaerovibrio	0.9	0.00649687	Bacteria	Synergistetes	2
Thermincola	0.916667	0.00410313	Bacteria	Firmicutes	2
Thermococcus	0.95	0.00112755	Archaea	Euryarchaeota	2
Thermocrinis	0.866667	0.0132262	Bacteria	Aquificae	2
Thermodesulfovibrio	0.866667	0.0132262	Bacteria	Nitrospirae	2
Thermofilum	0.966667	0.000403225	Archaea	Crenarchaeota	2
Thermoplasma	0.933333	0.00232264	Archaea	Euryarchaeota	2
Thermoproteus	0.933333	0.00232264	Archaea	Crenarchaeota	2
Thermosediminibacter	0.8	0.033885	Bacteria	Firmicutes	2
Thermosinus	0.833333	0.0222483	Bacteria	Firmicutes	2
Thermosipho	0.866667	0.0132262	Bacteria	Thermotogae	2
Thermosphaera	0.816667	0.0277816	Archaea	Crenarchaeota	2
Tropheryma	0.766667	0.0475434	Bacteria	Actinobacteria	2
unclassified (derived from Alicyclobacillaceae)	0.916667	0.00410313	Bacteria	Firmicutes	2
unclassified (derived from Candidatus Poribacteria)	0.85	0.0176117	Bacteria	Candidatus Poribacteria	2
unclassified (derived from Chroococcales)	0.933333	0.00232264	Bacteria	Cyanobacteria	2
unclassified (derived from Euryarchaeota)	0.883333	0.00957457	Archaea	Euryarchaeota	2
unclassified (derived from Opitutaceae)	0.933333	0.00232264	Bacteria	Verrucomicrobia	2
unclassified (derived from Thermotogales)	0.833333	0.0222483	Bacteria	Thermotogae	2
unclassified (derived from Vibrionaceae)	0.866667	0.0132262	Bacteria	Proteobacteria	2
Volvox	0.9	0.00649687	Eukaryota	Chlorophyta	2
Vulcanisaeta	0.983333	7.43385e-05	Archaea	Crenarchaeota	2
Xenorhabdus	0.95	0.00112755	Bacteria	Proteobacteria	2
Candidatus Hodgkinia	0.766667	0.0475434	Bacteria	Proteobacteria	3
Clavaria	0.783333	0.0405695	Eukaryota	Basidiomycota	3
Coelomomyces	0.9	0.00649687	Eukaryota	Blastocladiomycota	3
Dunaliella	0.883333	0.00957457	Eukaryota	Chlorophyta	3
Fluoribacter	0.95	0.00112755	Bacteria	Proteobacteria	3
Lentithecium	0.766667	0.0475434	Eukaryota	Ascomycota	3
Leptolyngbya	0.9	0.00649687	Bacteria	Cyanobacteria	3
Monomastix	0.766667	0.0475434	Eukaryota	Chlorophyta	3
Pedinomonas	0.766667	0.0475434	Eukaryota	Chlorophyta	3
Tilletia	-0.783333	0.0405695	Eukaryota	Basidiomycota	1
Dissoconium	-0.8	0.033885	Eukaryota	Ascomycota	1
Epidermophyton	-0.816667	0.0277816	Eukaryota	Ascomycota	1
Phycomyces	-0.833333	0.0222483	Eukaryota	unclassified (derived from Fungi)	1
Millerozyma	-0.866667	0.0132262	Eukaryota	Ascomycota	1
Mycosphaerella	-0.866667	0.0132262	Eukaryota	Ascomycota	1
Rhizopus	-0.866667	0.0132262	Eukaryota	unclassified (derived from Fungi)	1
Glomus	-0.883333	0.00957457	Eukaryota	Glomeromycota	1
Hypocrea	-0.933333	0.00232264	Eukaryota	Ascomycota	1
Allomyces	-0.95	0.00112755	Eukaryota	Blastocladiomycota	1
Metarhizium	-0.95	0.00112755	Eukaryota	Ascomycota	1
Cordyceps	-0.966667	0.000403225	Eukaryota	Ascomycota	1
Lecanicillium	-0.966667	0.000403225	Eukaryota	Ascomycota	1
Schizophyllum	-0.766667	0.0475434	Eukaryota	Basidiomycota	2
Malassezia	-0.783333	0.0405695	Eukaryota	Basidiomycota	2
Lachancea	-0.883333	0.00957457	Eukaryota	Ascomycota	2
Lodderomyces	-0.9	0.00649687	Eukaryota	Ascomycota	2
Zygosaccharomyces	-0.9	0.00649687	Eukaryota	Ascomycota	2
Eremothecium	-0.916667	0.00410313	Eukaryota	Ascomycota	2
Kluyveromyces	-0.916667	0.00410313	Eukaryota	Ascomycota	2
Yarrowia	-0.916667	0.00410313	Eukaryota	Ascomycota	2
Clavispora	-0.933333	0.00232264	Eukaryota	Ascomycota	2
Debaryomyces	-0.933333	0.00232264	Eukaryota	Ascomycota	2
Meyerozyma	-0.933333	0.00232264	Eukaryota	Ascomycota	2
Nakaseomyces	-0.933333	0.00232264	Eukaryota	Ascomycota	2
Scheffersomyces	-0.933333	0.00232264	Eukaryota	Ascomycota	2
Vanderwaltozyma	-0.933333	0.00232264	Eukaryota	Ascomycota	2
Paracoccidioides	-0.95	0.00112755	Eukaryota	Ascomycota	2
Trichophyton	-0.95	0.00112755	Eukaryota	Ascomycota	2
Candida	-0.966667	0.000403225	Eukaryota	Ascomycota	2
Pichia	-0.966667	0.000403225	Eukaryota	Ascomycota	2
Saccharomyces	-0.966667	0.000403225	Eukaryota	Ascomycota	2
Filifactor	-0.766667	0.0475434	Bacteria	Firmicutes	3
Shuttleworthia	-0.766667	0.0475434	Bacteria	Firmicutes	3
Ureaplasma	-0.766667	0.0475434	Bacteria	Tenericutes	3
Epulopiscium	-0.783333	0.0405695	Bacteria	Firmicutes	3
Gardnerella	-0.783333	0.0405695	Bacteria	Actinobacteria	3
Mesoplasma	-0.8	0.033885	Bacteria	Tenericutes	3
Erysipelothrix	-0.816667	0.0277816	Bacteria	Firmicutes	3
Oenococcus	-0.816667	0.0277816	Bacteria	Firmicutes	3
Gemella	-0.833333	0.0222483	Bacteria	Firmicutes	3
unclassified (derived from Burkholderiales)	-0.833333	0.0222483	Bacteria	Proteobacteria	3
unclassified (derived from Clostridiales Family XI. Incertae Sedis)	-0.833333	0.0222483	Bacteria	Firmicutes	3
Eremococcus	-0.85	0.0176117	Bacteria	Firmicutes	3
Mannheimia	-0.85	0.0176117	Bacteria	Proteobacteria	3
Weissella	-0.85	0.0176117	Bacteria	Firmicutes	3
Catonella	-0.866667	0.0132262	Bacteria	Firmicutes	3
Anaerofustis	-0.883333	0.00957457	Bacteria	Firmicutes	3
Bulleidia	-0.883333	0.00957457	Bacteria	Firmicutes	3
Candidatus Azobacteroides	-0.883333	0.00957457	Bacteria	Bacteroidetes	3
Coprobacillus	-0.9	0.00649687	Bacteria	Firmicutes	3
Abiotrophia	-0.916667	0.00410313	Bacteria	Firmicutes	3
Catenibacterium	-0.916667	0.00410313	Bacteria	Firmicutes	3
Peptostreptococcus	-0.966667	0.000403225	Bacteria	Firmicutes	3
Anaerotruncus	-0.766667	0.0475434	Bacteria	Firmicutes	4
Faecalibacterium	-0.783333	0.0405695	Bacteria	Firmicutes	4
Finegoldia	-0.783333	0.0405695	Bacteria	Firmicutes	4
Pediococcus	-0.783333	0.0405695	Bacteria	Firmicutes	4
Histophilus	-0.8	0.033885	Bacteria	Proteobacteria	4
Leuconostoc	-0.8	0.033885	Bacteria	Firmicutes	4
Peptoniphilus	-0.8	0.033885	Bacteria	Firmicutes	4
unclassified (derived from Clostridiales)	-0.8	0.033885	Bacteria	Firmicutes	4
Blautia	-0.833333	0.0222483	Bacteria	Firmicutes	4
Ilyobacter	-0.833333	0.0222483	Bacteria	Fusobacteria	4
Lactococcus	-0.833333	0.0222483	Bacteria	Firmicutes	4
Subdoligranulum	-0.833333	0.0222483	Bacteria	Firmicutes	4
unclassified (derived from Bacteroidetes)	-0.833333	0.0222483	Bacteria	Bacteroidetes	4
Coprococcus	-0.866667	0.0132262	Bacteria	Firmicutes	4
Oribacterium	-0.866667	0.0132262	Bacteria	Firmicutes	4
unclassified (derived from Erysipelotrichaceae)	-0.866667	0.0132262	Bacteria	Firmicutes	4
Acetivibrio	-0.883333	0.00957457	Bacteria	Firmicutes	4
Mycoplasma	-0.883333	0.00957457	Bacteria	Tenericutes	4
Brachyspira	-0.9	0.00649687	Bacteria	Spirochaetes	4
Granulicatella	-0.9	0.00649687	Bacteria	Firmicutes	4
Sebaldella	-0.9	0.00649687	Bacteria	Fusobacteria	4
Aerococcus	-0.916667	0.00410313	Bacteria	Firmicutes	4
Anaerococcus	-0.916667	0.00410313	Bacteria	Firmicutes	4
Holdemania	-0.916667	0.00410313	Bacteria	Firmicutes	4
Methanobrevibacter	-0.916667	0.00410313	Archaea	Euryarchaeota	4
Roseburia	-0.916667	0.00410313	Bacteria	Firmicutes	4
Turicibacter	-0.916667	0.00410313	Bacteria	Firmicutes	4
unclassified (derived from Ruminococcaceae)	-0.916667	0.00410313	Bacteria	Firmicutes	4
Macrococcus	-0.933333	0.00232264	Bacteria	Firmicutes	4
Alistipes	-0.95	0.00112755	Bacteria	Bacteroidetes	4
Butyrivibrio	-0.95	0.00112755	Bacteria	Firmicutes	4
Cellulosilyticum	-0.95	0.00112755	Bacteria	Firmicutes	4
Dorea	-0.95	0.00112755	Bacteria	Firmicutes	4
Moraxella	-0.95	0.00112755	Bacteria	Proteobacteria	4
unclassified (derived from Lachnospiraceae)	-0.95	0.00112755	Bacteria	Firmicutes	4
Carnobacterium	-0.966667	0.000403225	Bacteria	Firmicutes	4
Leptotrichia	-0.966667	0.000403225	Bacteria	Fusobacteria	4
Exiguobacterium	-0.766667	0.0475434	Bacteria	Firmicutes	5
Parabacteroides	-0.766667	0.0475434	Bacteria	Bacteroidetes	5
Porphyromonas	-0.766667	0.0475434	Bacteria	Bacteroidetes	5
Alkaliphilus	-0.816667	0.0277816	Bacteria	Firmicutes	5
Enterobacter	-0.85	0.0176117	Bacteria	Proteobacteria	5
Escherichia	-0.85	0.0176117	Bacteria	Proteobacteria	5
Lactobacillus	-0.85	0.0176117	Bacteria	Firmicutes	5
Staphylococcus	-0.85	0.0176117	Bacteria	Firmicutes	5
Campylobacter	-0.866667	0.0132262	Bacteria	Proteobacteria	5
Eubacterium	-0.866667	0.0132262	Bacteria	Firmicutes	5
Ruminococcus	-0.866667	0.0132262	Bacteria	Firmicutes	5
Oceanobacillus	-0.9	0.00649687	Bacteria	Firmicutes	5
Clostridium	-0.916667	0.00410313	Bacteria	Firmicutes	5
Psychrobacter	-0.916667	0.00410313	Bacteria	Proteobacteria	5
Streptococcus	-0.916667	0.00410313	Bacteria	Firmicutes	5
Acinetobacter	-0.933333	0.00232264	Bacteria	Proteobacteria	5
Enterococcus	-0.933333	0.00232264	Bacteria	Firmicutes	5
Fusobacterium	-0.933333	0.00232264	Bacteria	Fusobacteria	5
Listeria	-0.95	0.00112755	Bacteria	Firmicutes	5
Bacteroides	-0.966667	0.000403225	Bacteria	Bacteroidetes	5
Pantoea	-0.966667	0.000403225	Bacteria	Proteobacteria	5
Prevotella	-0.983333	7.43385e-05	Bacteria	Bacteroidetes	5
Tuber	-0.783333	0.0405695	Eukaryota	Ascomycota	6
Ustilago	-0.783333	0.0405695	Eukaryota	Basidiomycota	6
Ajellomyces	-0.916667	0.00410313	Eukaryota	Ascomycota	6
Arthroderma	-0.916667	0.00410313	Eukaryota	Ascomycota	6
Botryotinia	-0.916667	0.00410313	Eukaryota	Ascomycota	6
Chaetomium	-0.916667	0.00410313	Eukaryota	Ascomycota	6
Coccidioides	-0.916667	0.00410313	Eukaryota	Ascomycota	6
Gibberella	-0.916667	0.00410313	Eukaryota	Ascomycota	6
Magnaporthe	-0.916667	0.00410313	Eukaryota	Ascomycota	6
Nectria	-0.916667	0.00410313	Eukaryota	Ascomycota	6
Neosartorya	-0.916667	0.00410313	Eukaryota	Ascomycota	6
Neurospora	-0.916667	0.00410313	Eukaryota	Ascomycota	6
Phaeosphaeria	-0.916667	0.00410313	Eukaryota	Ascomycota	6
Podospora	-0.916667	0.00410313	Eukaryota	Ascomycota	6
Pyrenophora	-0.916667	0.00410313	Eukaryota	Ascomycota	6
Sclerotinia	-0.916667	0.00410313	Eukaryota	Ascomycota	6
Talaromyces	-0.916667	0.00410313	Eukaryota	Ascomycota	6
Uncinocarpus	-0.916667	0.00410313	Eukaryota	Ascomycota	6
Verticillium	-0.916667	0.00410313	Eukaryota	Ascomycota	6
Emericella	-0.933333	0.00232264	Eukaryota	Ascomycota	6
Filobasidiella	-0.933333	0.00232264	Eukaryota	Basidiomycota	6
Schizosaccharomyces	-0.933333	0.00232264	Eukaryota	Ascomycota	6
Penicillium	-0.95	0.00112755	Eukaryota	Ascomycota	6
Aspergillus	-0.966667	0.000403225	Eukaryota	Ascomycota	6
