# Supplementary material for: The Biogeography of Dust in the Eastern Mediterranean
Source: Research Square preprint supplement (doi:10.21203/rs.3.rs-149876/v1), 2021-01-25
Supplement: Supplementary file 7 [file bb105f9e301787f8f39cb287.xlsx]

## Sheet: Tot_Traits
KO	gene	Functional category
K11629	bceS; two-component system, OmpR family, bacitracin resistance sensor histidine kinase BceS [EC:2.7.13.3]	Bacitracin resistance
K11630	bceR; two-component system, OmpR family, bacitracin resistance response regulator BceR	Bacitracin resistance
K11631	bceA; bacitracin transport system ATP-binding protein	Bacitracin resistance
K11632	bceB; bacitracin transport system permease protein	Bacitracin resistance
K19083	braD, bceA; bacitracin transport system ATP-binding protein	Bacitracin resistance
K19084	braE, bceB; bacitracin transport system permease protein	Bacitracin resistance
K19081	braS, bceS; two-component system, OmpR family, sensor histidine kinase BraS/BceS [EC:2.7.13.3]	Bacitracin resistance
K19802	braR, bceR; two-component system, OmpR family, response regulator protein BraR/BceR	Bacitracin resistance
K00687	pbp2B, penA; penicillin-binding protein 2B	Beta-lactam resistance
K01467	ampC; beta-lactamase class C [EC:3.5.2.6]	Beta-lactam resistance
K01467	E3.5.2.6, ampC, penP; beta-lactamase [EC:3.5.2.6]	Beta-lactam resistance
K02171	blaI; BlaI family transcriptional regulator, penicillinase repressor	Beta-lactam resistance
K02172	blaR1; bla regulator protein blaR1	Beta-lactam resistance
K02545	mecA; penicillin-binding protein 2 prime [EC:3.4.16.4]	Beta-lactam resistance
K02546	mecI; BlaI family transcriptional regulator, methicillin resistance regulatory protein	Beta-lactam resistance
K02547	mecR1; methicillin resistance protein	Beta-lactam resistance
K03585	acrA, mexA, adeI, smeD, mtrC, cmeA; membrane fusion protein, multidrug efflux system	Beta-lactam resistance
K03587	ftsI; cell division protein FtsI (penicillin-binding protein 3) [EC:3.4.16.4]	Beta-lactam resistance
K03693	pbp1b; penicillin-binding protein 1B	Beta-lactam resistance
K05366	mrcA; penicillin-binding protein 1A [EC:2.4.1.129 3.4.16.4]	Beta-lactam resistance
K05515	mrdA; penicillin-binding protein 2 [EC:3.4.16.4]	Beta-lactam resistance
K08218	ampG; MFS transporter, PAT family, beta-lactamase induction signal transducer AmpG	Beta-lactam resistance
K08720	ompU; outer membrane protein OmpU	Beta-lactam resistance
K09475	ompC; outer membrane pore protein C	Beta-lactam resistance
K09476	ompF; outer membrane pore protein F	Beta-lactam resistance
K10823	oppF; oligopeptide transport system ATP-binding protein	Beta-lactam resistance
K12552	pbpA; penicillin-binding protein 1 [EC:3.4.-.-]	Beta-lactam resistance
K12553	pbp3; penicillin-binding protein 3 [EC:3.4.-.-]	Beta-lactam resistance
K12555	pbp2A; penicillin-binding protein 2A [EC:2.4.1.129 3.4.16.4]	Beta-lactam resistance
K12556	pbp2X; penicillin-binding protein 2X	Beta-lactam resistance
K15580	oppA, mppA; oligopeptide transport system substrate-binding protein	Beta-lactam resistance
K15581	oppB; oligopeptide transport system permease protein	Beta-lactam resistance
K15582	oppC; oligopeptide transport system permease protein	Beta-lactam resistance
K15583	oppD; oligopeptide transport system ATP-binding protein	Beta-lactam resistance
K17836	penP; beta-lactamase class A [EC:3.5.2.6]	Beta-lactam resistance
K17837	bla2, blm, ccrA, blaB; metallo-beta-lactamase class B [EC:3.5.2.6]	Beta-lactam resistance
K17838	oxa; beta-lactamase class D [EC:3.5.2.6]	Beta-lactam resistance
K17850	ampR; LysR family transcriptional regulator, regulator of gene expression of beta-lactamase	Beta-lactam resistance
K18072	parS; two-component system, OmpR family, sensor kinase ParS [EC:2.7.13.3]	Beta-lactam resistance
K18073	parR; two-component system, OmpR family, response regulator ParR	Beta-lactam resistance
K18093	oprD; imipenem/basic amino acid-specific outer membrane pore [EC:3.4.21.-]	Beta-lactam resistance
K18094	mexX, amrA; membrane fusion protein, multidrug efflux system	Beta-lactam resistance
K18095	mexY, amrB; multidrug efflux pump	Beta-lactam resistance
K18104	abcA, bmrA; ATP-binding cassette, subfamily B, bacterial AbcA/BmrA [EC:7.6.2.2]	Beta-lactam resistance
K18129	mexZ; TetR/AcrR family transcriptional regulator, mexXY operon repressor	Beta-lactam resistance
K18130	nalC; TetR/AcrR family transcriptional regulator, transcriptional repressor NalC	Beta-lactam resistance
K18131	mexR; MarR family transcriptional regulator, repressor of the mexAB-oprM multidrug resistance operon	Beta-lactam resistance
K18133	K18133, porB; major outer membrane protein P.IB	Beta-lactam resistance
K18135	nalD; TetR/AcrR family transcriptional regulator, repressor of the mexAB-oprM multidrug resistance o	Beta-lactam resistance
K18136	acrR; TetR/AcrR family transcriptional regulator, multidrug resistance operon repressor	Beta-lactam resistance
K18137	adeN; TetR/AcrR family transcriptional regulator, repressor of the adeIJK operon	Beta-lactam resistance
K18138	acrB, mexB, adeJ, smeE, mtrD, cmeB; multidrug efflux pump	Beta-lactam resistance
K18139	oprM, emhC, ttgC, cusC, adeK, smeF, mtrE, cmeC, gesC; outer membrane protein, multidrug efflux syste	Beta-lactam resistance
K18143	adeS; two-component system, OmpR family, sensor histidine kinase AdeS [EC:2.7.13.3]	Beta-lactam resistance
K18144	adeR; two-component system, OmpR family, response regulator AdeR	Beta-lactam resistance
K18145	adeA; membrane fusion protein, multidrug efflux system	Beta-lactam resistance
K18146	adeB; multidrug efflux pump	Beta-lactam resistance
K18147	adeC; outer membrane protein, multidrug efflux system	Beta-lactam resistance
K18148	rtcB; release factor H-coupled RctB family protein	Beta-lactam resistance
K18149	pbp5, pbp4, pbp3; penicillin-binding protein	Beta-lactam resistance
K18150	armR; antirepressor for MexR	Beta-lactam resistance
K18698	blaTEM; beta-lactamase class A TEM [EC:3.5.2.6]	Beta-lactam resistance
K18699	blaSHV; beta-lactamase class A SHV [EC:3.5.2.6]	Beta-lactam resistance
K18766	blaZ; beta-lactamase class A BlaZ [EC:3.5.2.6]	Beta-lactam resistance
K18767	blaCTX-M; beta-lactamase class A CTX-M [EC:3.5.2.6]	Beta-lactam resistance
K18768	blaKPC; beta-lactamase class A KPC [EC:3.5.2.6]	Beta-lactam resistance
K18780	blaNDM; metallo-beta-lactamase class B NDM [EC:3.5.2.6]	Beta-lactam resistance
K18781	blaVIM; metallo-beta-lactamase class B VIM [EC:3.5.2.6]	Beta-lactam resistance
K18782	blaIMP; metallo-beta-lactamase class B IMP [EC:3.5.2.6]	Beta-lactam resistance
K18790	blaOXA-1; beta-lactamase class D OXA-1 [EC:3.5.2.6]	Beta-lactam resistance
K18791	blaOXA-2; beta-lactamase class D OXA-2 [EC:3.5.2.6]	Beta-lactam resistance
K18792	blaOXA-10; beta-lactamase class D OXA-10 [EC:3.5.2.6]	Beta-lactam resistance
K18793	blaOXA-23; beta-lactamase class D OXA-23 [EC:3.5.2.6]	Beta-lactam resistance
K18794	blaOXA-51; beta-lactamase class D OXA-51 [EC:3.5.2.6]	Beta-lactam resistance
K18795	blaCARB-1; beta-lactamase class A CARB-1 [EC:3.5.2.6]	Beta-lactam resistance
K18796	blaLEN; beta-lactamase class A LEN [EC:3.5.2.6]	Beta-lactam resistance
K18797	blaPER; beta-lactamase class A PER [EC:3.5.2.6]	Beta-lactam resistance
K18970	blaGES; beta-lactamase class A GES [EC:3.5.2.6]	Beta-lactam resistance
K18971	blaOXA-24; beta-lactamase class D OXA-24 [EC:3.5.2.6]	Beta-lactam resistance
K18972	blaOXA-58; beta-lactamase class D OXA-58 [EC:3.5.2.6]	Beta-lactam resistance
K18973	blaOXA-50; beta-lactamase class D OXA-50 [EC:3.5.2.6]	Beta-lactam resistance
K18976	blaOXA-48; beta-lactamase class D OXA-48 [EC:3.5.2.6]	Beta-lactam resistance
K19095	blaCMY-1; beta-lactamase class C CMY-1 [EC:3.5.2.6]	Beta-lactam resistance
K19096	blaCMY-2; beta-lactamase class C CMY-2 [EC:3.5.2.6]	Beta-lactam resistance
K19097	blaVEB; beta-lactamase class A VEB [EC:3.5.2.6]	Beta-lactam resistance
K19098	blaOXA-9; beta-lactamase class D OXA-9 [EC:3.5.2.6]	Beta-lactam resistance
K19099	blaGIM; metallo-beta-lactamase class B GIM [EC:3.5.2.6]	Beta-lactam resistance
K19100	blaDHA; beta-lactamase class C DHA [EC:3.5.2.6]	Beta-lactam resistance
K19101	blaFOX; beta-lactamase class C FOX [EC:3.5.2.6]	Beta-lactam resistance
K19209	blaOXA-42; beta-lactamase class D OXA-42 [EC:3.5.2.6]	Beta-lactam resistance
K19210	blaOXA-61; beta-lactamase class D OXA-61 [EC:3.5.2.6]	Beta-lactam resistance
K19211	blaOXA-62; beta-lactamase class D OXA-62 [EC:3.5.2.6]	Beta-lactam resistance
K19212	blaOXA-63; beta-lactamase class D OXA-63 [EC:3.5.2.6]	Beta-lactam resistance
K19213	blaOXA-12; beta-lactamase class D OXA-12 [EC:3.5.2.6]	Beta-lactam resistance
K19214	blaACC; beta-lactamase class C ACC [EC:3.5.2.6]	Beta-lactam resistance
K19215	blaACT_MIR; beta-lactamase class C ACT/MIR [EC:3.5.2.6]	Beta-lactam resistance
K19216	blaIND; metallo-beta-lactamase class B IND [EC:3.5.2.6]	Beta-lactam resistance
K19217	blaCARB-17; beta-lactamase class A CARB-17 [EC:3.5.2.6]	Beta-lactam resistance
K19218	blaCARB-5; beta-lactamase class A CARB-5 [EC:3.5.2.6]	Beta-lactam resistance
K19316	blaIMI; beta-lactamase class A IMI [EC:3.5.2.6]	Beta-lactam resistance
K19317	blaBEL; beta-lactamase class A BEL [EC:3.5.2.6]	Beta-lactam resistance
K19318	blaOXA-213; beta-lactamase class D OXA-213 [EC:3.5.2.6]	Beta-lactam resistance
K19319	blaOXA-134; beta-lactamase class D OXA-134 [EC:3.5.2.6]	Beta-lactam resistance
K19320	blaOXA-211; beta-lactamase class D OXA-211 [EC:3.5.2.6]	Beta-lactam resistance
K19321	blaOXA-214; beta-lactamase class D OXA-214 [EC:3.5.2.6]	Beta-lactam resistance
K19322	blaOXA-229; beta-lactamase class D OXA-229 [EC:3.5.2.6]	Beta-lactam resistance
K20319	blaADC; beta-lactamase class C ADC [EC:3.5.2.6]	Beta-lactam resistance
K20320	blaPDC; beta-lactamase class C PDC [EC:3.5.2.6]	Beta-lactam resistance
K21266	blaOXA-286; beta-lactamase class D OXA-286 [EC:3.5.2.6]	Beta-lactam resistance
K21276	blaOXA-22; beta-lactamase class D OXA-22 [EC:3.5.2.6]	Beta-lactam resistance
K21277	blaOXA-60; beta-lactamase class D OXA-60 [EC:3.5.2.6]	Beta-lactam resistance
K22331	blaOXA-184; beta-lactamase class D OXA-184 [EC:3.5.2.6]	Beta-lactam resistance
K22332	blaOXA-548; beta-lactamase class D OXA-548 [EC:3.5.2.6]	Beta-lactam resistance
K22333	blaOXA-493; beta-lactamase class D OXA-493 [EC:3.5.2.6]	Beta-lactam resistance
K22334	blaOXA-464; beta-lactamase class D OXA-464 [EC:3.5.2.6]	Beta-lactam resistance
K22335	blaOXA-114; beta-lactamase class D OXA-114 [EC:3.5.2.6]	Beta-lactam resistance
K22346	blaSME; beta-lactamase class A SME [EC:3.5.2.6]	Beta-lactam resistance
K22351	blaOXA-209; beta-lactamase class D OXA-209 [EC:3.5.2.6]	Beta-lactam resistance
K22352	blaOXA-29; beta-lactamase class D OXA-29 [EC:3.5.2.6]	Beta-lactam resistance
K12340	tolC; outer membrane protein	Beta-lactam resistance
K00677	lpxA; UDP-N-acetylglucosamine acyltransferase [EC:2.3.1.129]	CAMP resistance
K01364	speB; streptopain [EC:3.4.22.10]	CAMP resistance
K01399	lasB; pseudolysin [EC:3.4.24.26]	CAMP resistance
K01401	aur; aureolysin [EC:3.4.24.29]	CAMP resistance
K01406	prtC; serralysin [EC:3.4.24.40]	CAMP resistance
K01448	amiABC; N-acetylmuramoyl-L-alanine amidase [EC:3.5.1.28]	CAMP resistance
K03367	dltA; D-alanine--poly(phosphoribitol) ligase subunit 1 [EC:6.1.1.13]	CAMP resistance
K03585	acrA, mexA, adeI, smeD, mtrC, cmeA; membrane fusion protein, multidrug efflux system	CAMP resistance
K03673	dsbA; thiol:disulfide interchange protein DsbA	CAMP resistance
K03739	dltB; membrane protein involved in D-alanine export	CAMP resistance
K03740	dltD; D-alanine transfer protein	CAMP resistance
K03760	eptA, pmrC; lipid A ethanolaminephosphotransferase [EC:2.7.8.43]	CAMP resistance
K03767	PPIA; peptidyl-prolyl cis-trans isomerase A (cyclophilin A) [EC:5.2.1.8]	CAMP resistance
K04771	degP, htrA; serine protease Do [EC:3.4.21.107]	CAMP resistance
K06079	cutF, nlpE; copper homeostasis protein (lipoprotein)	CAMP resistance
K07264	arnT, pmrK; 4-amino-4-deoxy-L-arabinose transferase [EC:2.4.2.43]	CAMP resistance
K07637	phoQ; two-component system, OmpR family, sensor histidine kinase PhoQ [EC:2.7.13.3]	CAMP resistance
K07640	cpxA; two-component system, OmpR family, sensor histidine kinase CpxA [EC:2.7.13.3]	CAMP resistance
K07643	basS; two-component system, OmpR family, sensor histidine kinase BasS [EC:2.7.13.3]	CAMP resistance
K07660	phoP; two-component system, OmpR family, response regulator PhoP	CAMP resistance
K07662	cpxR; two-component system, OmpR family, response regulator CpxR	CAMP resistance
K07771	basR; two-component system, OmpR family, response regulator BasR	CAMP resistance
K07806	arnB, pmrH; UDP-4-amino-4-deoxy-L-arabinose-oxoglutarate aminotransferase [EC:2.6.1.87]	CAMP resistance
K08477	pgtE; outer membrane protease E [EC:3.4.21.-]	CAMP resistance
K08589	rgpA_B; gingipain R [EC:3.4.22.37]	CAMP resistance
K10011	arnA, pmrI; UDP-4-amino-4-deoxy-L-arabinose formyltransferase / UDP-glucuronic acid dehydrogenase (U	CAMP resistance
K10012	arnC, pmrF; undecaprenyl-phosphate 4-deoxy-4-formamido-L-arabinose transferase [EC:2.4.2.53]	CAMP resistance
K12962	arnE; undecaprenyl phosphate-alpha-L-ara4N flippase subunit ArnE	CAMP resistance
K12963	arnF; undecaprenyl phosphate-alpha-L-ara4N flippase subunit ArnF	CAMP resistance
K12973	pagP, crcA; lipid IVA palmitoyltransferase [EC:2.3.1.251]	CAMP resistance
K12975	eptB; KDO II ethanolaminephosphotransferase [EC:2.7.8.42]	CAMP resistance
K13014	arnD; undecaprenyl phosphate-alpha-L-ara4FN deformylase [EC:3.5.1.-]	CAMP resistance
K13632	marA; AraC family transcriptional regulator, mar-sox-rob regulon activator	CAMP resistance
K14188	dltC; D-alanine--poly(phosphoribitol) ligase subunit 2 [EC:6.1.1.13]	CAMP resistance
K14198	sak; staphylokinase	CAMP resistance
K14205	mprF, fmtC; phosphatidylglycerol lysyltransferase [EC:2.3.2.3]	CAMP resistance
K18072	parS; two-component system, OmpR family, sensor kinase ParS [EC:2.7.13.3]	CAMP resistance
K18073	parR; two-component system, OmpR family, response regulator ParR	CAMP resistance
K18138	acrB, mexB, adeJ, smeE, mtrD, cmeB; multidrug efflux pump	CAMP resistance
K18514	mgrR; small regulatory RNA MgrR	CAMP resistance
K19077	graS; two-component system, OmpR family, sensor histidine kinase GraS [EC:2.7.13.3]	CAMP resistance
K19078	graR; two-component system, OmpR family, response regulator protein GraR	CAMP resistance
K19079	vraF; cationic antimicrobial peptide transport system ATP-binding protein	CAMP resistance
K19080	vraG; cationic antimicrobial peptide transport system permease protein	CAMP resistance
K19226	sapA; cationic peptide transport system substrate-binding protein	CAMP resistance
K19227	sapB; cationic peptide transport system permease protein	CAMP resistance
K19228	sapC; cationic peptide transport system permease protein	CAMP resistance
K19229	sapD; cationic peptide transport system ATP-binding protein	CAMP resistance
K19230	sapF; cationic peptide transport system ATP-binding protein	CAMP resistance
K19236	ycfS; L,D-transpeptidase YcfS	CAMP resistance
K19238	pmrD; signal transduction protein PmrD	CAMP resistance
K19239	sapZ; predicted membrane protein	CAMP resistance
K19240	sic; inhibitor of complement-mediated lysis	CAMP resistance
K12340	tolC; outer membrane protein	CAMP resistance
K07804	pagC; putatice virulence related protein PagC	CAMP resistance
K07790	pagO; putative membrane protein PagO	CAMP resistance
K07805	pagD; putative membrane protein PagD	CAMP resistance
K07801	pagK; PhoPQ-activated protein	CAMP resistance
K11633	yxdK; two-component system, OmpR family, sensor histidine kinase YxdK [EC:2.7.13.3]	CAMP resistance
K11634	yxdJ; two-component system, OmpR family, response regulator YxdJ	CAMP resistance
K11635	yxdL; putative ABC transport system ATP-binding protein	CAMP resistance
K11636	yxdM; putative ABC transport system permease protein	CAMP resistance
K11210	fosB; metallothiol transferase [EC:2.5.1.-]	Fosfomycin resistance
K21252	fosX; fosfomycin resistance protein FosX	Fosfomycin resistance
K21253	fosA; glutathione S-transferase fosA [EC:2.5.1.18]	Fosfomycin resistance
K05685	macB; macrolide transport system ATP-binding/permease protein [EC:3.6.3.-]	Macrolide resistance
K00788	mdtB; RND superfamily, multidrug transport protein MdtB	Multi-drug resistance
K03585	acrA, mexA, adeI, smeD, mtrC, cmeA; membrane fusion protein, multidrug efflux system	Multi-drug resistance
K07690	evgA, bvgA; two-component system, NarL family, response regulator EvgA	Multi-drug resistance
K07789	mdtC; RND superfamily, multidrug transport protein MdtC	Multi-drug resistance
K07799	mdtA; putative multidrug efflux transporter MdtA	Multi-drug resistance
K08167	smvA, qacA, lfrA; MFS transporter, DHA2 family, multidrug resistance protein	Multi-drug resistance
K08170	norB, norC; MFS transporter, DHA2 family, multidrug resistance protein	Multi-drug resistance
K08721	oprJ; outer membrane protein, multidrug efflux system	Multi-drug resistance
K09476	ompF; outer membrane pore protein F	Multi-drug resistance
K12340	tolC; outer membrane protein	Multi-drug resistance
K13632	marA; AraC family transcriptional regulator, mar-sox-rob regulon activator	Multi-drug resistance
K18094	mexX, amrA; membrane fusion protein, multidrug efflux system	Multi-drug resistance
K18095	mexY, amrB; multidrug efflux pump	Multi-drug resistance
K18104	abcA, bmrA; ATP-binding cassette, subfamily B, bacterial AbcA/BmrA [EC:7.6.2.2]	Multi-drug resistance
K18129	mexZ; TetR/AcrR family transcriptional regulator, mexXY operon repressor	Multi-drug resistance
K18131	mexR; MarR family transcriptional regulator, repressor of the mexAB-oprM multidrug resistance operon	Multi-drug resistance
K18138	acrB, mexB, adeJ, smeE, mtrD, cmeB; multidrug efflux pump	Multi-drug resistance
K18139	oprM, emhC, ttgC, cusC, adeK, smeF, mtrE, cmeC, gesC; outer membrane protein, multidrug efflux syste	Multi-drug resistance
K18140	envR, acrS; TetR/AcrR family transcriptional regulator, acrEF/envCD operon repressor	Multi-drug resistance
K18141	acrE; membrane fusion protein, multidrug efflux system	Multi-drug resistance
K18142	acrF; multidrug efflux pump	Multi-drug resistance
K18143	adeS; two-component system, OmpR family, sensor histidine kinase AdeS [EC:2.7.13.3]	Multi-drug resistance
K18144	adeR; two-component system, OmpR family, response regulator AdeR	Multi-drug resistance
K18145	adeA; membrane fusion protein, multidrug efflux system	Multi-drug resistance
K18146	adeB; multidrug efflux pump	Multi-drug resistance
K18147	adeC; outer membrane protein, multidrug efflux system	Multi-drug resistance
K18294	nfxB; TetR/AcrR family transcriptional regulator, mexCD-oprJ	Multi-drug resistance
K18295	mexC; membrane fusion protein, multidrug efflux system	Multi-drug resistance
K18296	mexD; multidrug efflux pump	Multi-drug resistance
K18297	mexT; LysR family transcriptional regulator, mexEF-oprN operon transcriptional activator	Multi-drug resistance
K18298	mexE; membrane fusion protein, multidrug efflux system	Multi-drug resistance
K18299	mexF; multidrug efflux pump	Multi-drug resistance
K18300	oprN; outer membrane protein, multidrug efflux system	Multi-drug resistance
K18301	mexL; TetR/AcrR family transcriptional regulator, mexJK operon transcriptional repressor	Multi-drug resistance
K18302	mexJ; membrane fusion protein, multidrug efflux system	Multi-drug resistance
K18303	mexK; multidrug efflux pump	Multi-drug resistance
K18304	lasR; LuxR family transcriptional regulator, quorum-sensing system regulator LasR	Multi-drug resistance
K18513	micF; small regulatory RNA MicF	Multi-drug resistance
K18898	mdtE; membrane fusion protein, multidrug efflux system	Multi-drug resistance
K18899	mdtF; multidrug efflux pump	Multi-drug resistance
K18900	bpeT; LysR family transcriptional regulator, regulator for bpeEF and oprC	Multi-drug resistance
K18901	bpeE; membrane fusion protein, multidrug efflux system	Multi-drug resistance
K18902	bpeF; multidrug efflux pump	Multi-drug resistance
K18903	oprC, opcM; outer membrane protein, multidrug efflux system	Multi-drug resistance
K18906	mgrA; MarR family transcriptional regulator, multiple gene regulator MgrA	Multi-drug resistance
K18907	norG; GntR family transcriptional regulator, regulator for abcA and norABC	Multi-drug resistance
K18908	mepA; multidrug efflux pump	Multi-drug resistance
K18909	mepR; MarR family transcriptional regulator, repressor for mepA	Multi-drug resistance
K18938	qacR; TetR/AcrR family transcriptional regulator, repressor for qacA	Multi-drug resistance
K19591	cueR; MerR family transcriptional regulator, copper efflux regulator	Multi-drug resistance
K19593	opmE; outer membrane protein, multidrug efflux system	Multi-drug resistance
K19594	gesB, mexQ; gold/copper resistance efflux pump	Multi-drug resistance
K19595	gesA, mexP; membrane fusion protein, gold/copper resistance efflux system	Multi-drug resistance
K07799	mdtA; membrane fusion protein, multidrug efflux system	Multi-drug resistance
K07788	mdtB; multidrug efflux pump	Multi-drug resistance
K07789	mdtC; multidrug efflux pump	Multi-drug resistance
K18326	mdtD; MFS transporter, DHA2 family, multidrug resistance protein	Multi-drug resistance
K18324	acrD; multidrug efflux pump	Multi-drug resistance
K18940	arlS; two-component system, OmpR family, sensor histidine kinase ArlS [EC:2.7.13.3]	Multi-drug resistance
K18941	arlR; two-component system, OmpR family, response regulator ArlR	Multi-drug resistance
K18235	vgb; virginiamycin B lyase [EC:4.2.99.-]	Streptogramin resistance
K08168	tetB; MFS transporter, DHA2 family, metal-tetracycline-proton antiporter	Tetracycline resistance
K18221	tetX; tetracycline 11a-monooxygenase, tetracycline resistance protein [EC:1.14.13.231]	Tetracycline resistance
K18906	mgrA; MarR family transcriptional regulator, multiple gene regulator MgrA	Tetracycline resistance
K01000	mraY; phospho-N-acetylmuramoyl-pentapeptide-transferase [EC:2.7.8.13]	Vancomycin resistance
K01775	alr; alanine racemase [EC:5.1.1.1]	Vancomycin resistance
K01921	ddl; D-alanine-D-alanine ligase [EC:6.3.2.4]	Vancomycin resistance
K01929	murF; UDP-N-acetylmuramoyl-tripeptide--D-alanyl-D-alanine ligase [EC:6.3.2.10]	Vancomycin resistance
K02563	murG; UDP-N-acetylglucosamine--N-acetylmuramyl-(pentapeptide) pyrophosphoryl-undecaprenol N-acetylgl	Vancomycin resistance
K07260	vanY; zinc D-Ala-D-Ala carboxypeptidase [EC:3.4.17.14]	Vancomycin resistance
K07681	vraS; two-component system, NarL family, vancomycin resistance sensor histidine kinase VraS [EC:2.7.13.3]	Vancomycin resistance
K07694	vraR; two-component system, NarL family, vancomycin resistance associated response regulator VraR	Vancomycin resistance
K08641	vanX; zinc D-Ala-D-Ala dipeptidase [EC:3.4.13.22]	Vancomycin resistance
K15739	vanB, vanA, vanD; D-alanine---(R)-lactate ligase [EC:6.1.2.1]	Vancomycin resistance
K18344	vanRB, vanR, vanRD; two-component system, OmpR family, response regulator VanR	Vancomycin resistance
K18345	vanSB, vanS, vanSD; two-component system, OmpR family, sensor histidine kinase VanS [EC:2.7.13.3]	Vancomycin resistance
K18346	vanW; vancomycin resistance protein VanW	Vancomycin resistance
K18347	vanH; D-specific alpha-keto acid dehydrogenase [EC:1.1.1.-]	Vancomycin resistance
K18348	vanT; serine/alanine racemase [EC:5.1.1.18 5.1.1.1]	Vancomycin resistance
K18349	vanRC, vanRE, vanRG; two-component system, OmpR family, response regulator VanR	Vancomycin resistance
K18350	vanSC, vanSE, vanSG; two-component system, OmpR family, sensor histidine kinase VanS [EC:2.7.13.3]	Vancomycin resistance
K18351	vanSAc; two-component system, OmpR family, sensor histidine kinase VanS [EC:2.7.13.3]	Vancomycin resistance
K18352	vanRAc; two-component system, OmpR family, response regulator VanR	Vancomycin resistance
K18353	vanJ; vancomycin resistance protein VanJ	Vancomycin resistance
K18354	vanK; vancomycin resistance protein VanK	Vancomycin resistance
K18856	vanC, vanE, vanG; D-alanine---D-serine ligase [EC:6.3.2.35]	Vancomycin resistance
K18866	vanXY; zinc D-Ala-D-Ala dipeptidase/carboxypeptidase [EC:3.4.13.22 3.4.17.14]	Vancomycin resistance
K01060	E3.1.1.41; cephalosporin-C deacetylase [EC:3.1.1.41]	Penicillin and cephalosporin biosynthesis
K01434	E3.5.1.11; penicillin amidase [EC:3.5.1.11]	Penicillin and cephalosporin biosynthesis
K04126	E1.21.3.1; isopenicillin-N synthase [EC:1.21.3.1]	Penicillin and cephalosporin biosynthesis
K04128	cmcH; hydroxymethyl cephem carbamoyltransferase [EC:2.1.3.7]	Penicillin and cephalosporin biosynthesis
K10852	E2.3.1.164; isopenicillin-N N-acyltransferase [EC:2.3.1.164]	Penicillin and cephalosporin biosynthesis
K04127	cefD; isopenicillin-N epimerase [EC:5.1.1.17]	Penicillin and cephalosporin biosynthesis
K00067	rfbD; dTDP-4-dehydrorhamnose reductase [EC:1.1.1.133]	Streptomycin biosynthesis
K00973	E2.7.7.24, rfbA, rffH; glucose-1-phosphate thymidylyltransferase [EC:2.7.7.24]	Streptomycin biosynthesis
K01710	E4.2.1.46, rfbB, rffG; dTDP-glucose 4,6-dehydratase [EC:4.2.1.46]	Streptomycin biosynthesis
K01790	rfbC; dTDP-4-dehydrorhamnose 3,5-epimerase [EC:5.1.3.13]	Streptomycin biosynthesis
K04340	strB1; scyllo-inosamine-4-phosphate amidinotransferase 1 [EC:2.1.4.2]	Streptomycin biosynthesis
K05957	stsC; L-glutamine:scyllo-inosose aminotransferase [EC:2.6.1.50]	Streptomycin biosynthesis
K12570	strA; streptomycin 6-kinase [EC:2.7.1.72]	Streptomycin biosynthesis
K00239	succinate dehydrogenase	Anoxygenic photosynthesis in green nonsulfur bacteria
K00240	succinate dehydrogenase	Anoxygenic photosynthesis in green nonsulfur bacteria
K00241	succinate dehydrogenase	Anoxygenic photosynthesis in green nonsulfur bacteria
K00242	succinate dehydrogenase	Anoxygenic photosynthesis in green nonsulfur bacteria
K00244	succinate dehydrogenase	Anoxygenic photosynthesis in green nonsulfur bacteria
K00245	succinate dehydrogenase	Anoxygenic photosynthesis in green nonsulfur bacteria
K00246	succinate dehydrogenase	Anoxygenic photosynthesis in green nonsulfur bacteria
K00247	succinate dehydrogenase	Anoxygenic photosynthesis in green nonsulfur bacteria
K01676	fumarate hydratase	Anoxygenic photosynthesis in green nonsulfur bacteria
K01677	fumarate hydratase	Anoxygenic photosynthesis in green nonsulfur bacteria
K01678	fumarate hydratase	Anoxygenic photosynthesis in green nonsulfur bacteria
K01679	fumarate hydratase	Anoxygenic photosynthesis in green nonsulfur bacteria
K01847	methylmalonyl-CoA mutase	Anoxygenic photosynthesis in green nonsulfur bacteria
K01848	methylmalonyl-CoA mutase	Anoxygenic photosynthesis in green nonsulfur bacteria
K01848	E5.4.99.2A, mcmA1; methylmalonyl-CoA mutase, N-terminal domain [EC:5.4.99.2]	Anoxygenic photosynthesis in green nonsulfur bacteria
K01849	methylmalonyl-CoA mutase	Anoxygenic photosynthesis in green nonsulfur bacteria
K01849	E5.4.99.2B, mcmA2; methylmalonyl-CoA mutase, C-terminal domain [EC:5.4.99.2]	Anoxygenic photosynthesis in green nonsulfur bacteria
K01961	acetyl-CoA carboxylase carboxyl transferase	Anoxygenic photosynthesis in green nonsulfur bacteria
K01961	accC; acetyl-CoA carboxylase, biotin carboxylase subunit [EC:6.4.1.2 6.3.4.14]	Anoxygenic photosynthesis in green nonsulfur bacteria
K01962	acetyl-CoA carboxylase carboxyl transferase	Anoxygenic photosynthesis in green nonsulfur bacteria
K01962	accA; acetyl-CoA carboxylase carboxyl transferase subunit alpha [EC:6.4.1.2 2.1.3.15]	Anoxygenic photosynthesis in green nonsulfur bacteria
K01963	acetyl-CoA carboxylase carboxyl transferase	Anoxygenic photosynthesis in green nonsulfur bacteria
K01963	accD; acetyl-CoA carboxylase carboxyl transferase subunit beta [EC:6.4.1.2 2.1.3.15]	Anoxygenic photosynthesis in green nonsulfur bacteria
K01965	propionyl-CoA carboxylase	Anoxygenic photosynthesis in green nonsulfur bacteria
K01966	propionyl-CoA carboxylase	Anoxygenic photosynthesis in green nonsulfur bacteria
K02160	accB, bccP; acetyl-CoA carboxylase biotin carboxyl carrier protein	Anoxygenic photosynthesis in green nonsulfur bacteria
K02160	acetyl-CoA carboxylase biotin carboxyl carrier protein	Anoxygenic photosynthesis in green nonsulfur bacteria
K05606	MCEE, epi; methylmalonyl-CoA/ethylmalonyl-CoA epimerase [EC:5.1.99.1]	Anoxygenic photosynthesis in green nonsulfur bacteria
K05606	methylmalonyl-CoA epimerase	Anoxygenic photosynthesis in green nonsulfur bacteria
K08691	mcl; malyl-CoA/(S)-citramalyl-CoA lyase [EC:4.1.3.24 4.1.3.25]	Anoxygenic photosynthesis in green nonsulfur bacteria
K08691	malyl-CoA lyase	Anoxygenic photosynthesis in green nonsulfur bacteria
K08928	pufL; photosynthetic reaction center L subunit	Anoxygenic photosynthesis in green nonsulfur bacteria
K08929	pufM; photosynthetic reaction center M subunit	Anoxygenic photosynthesis in green nonsulfur bacteria
K09709	meh; 3-methylfumaryl-CoA hydratase [EC:4.2.1.153]	Anoxygenic photosynthesis in green nonsulfur bacteria
K09709	mesaconyl-C4 CoA hydratase	Anoxygenic photosynthesis in green nonsulfur bacteria
K11942	methylmalonyl-CoA mutase	Anoxygenic photosynthesis in green nonsulfur bacteria
K14449	mch, mcd; 2-methylfumaryl-CoA hydratase [EC:4.2.1.148]	Anoxygenic photosynthesis in green nonsulfur bacteria
K14449	mesaconyl-CoA hydratase	Anoxygenic photosynthesis in green nonsulfur bacteria
K14468	mcr; malonyl-CoA reductase / 3-hydroxypropionate dehydrogenase (NADP+) [EC:1.2.1.75 1.1.1.298]	Anoxygenic photosynthesis in green nonsulfur bacteria
K14468	malonyl-CoA reductase / 3-hydroxypropionate dehydrogenase (NADP+)	Anoxygenic photosynthesis in green nonsulfur bacteria
K14469	K14469; acrylyl-CoA reductase (NADPH) / 3-hydroxypropionyl-CoA dehydratase / 3-hydroxypropionyl-CoA	Anoxygenic photosynthesis in green nonsulfur bacteria
K14469	acrylyl-CoA reductase (NADPH) / 3-hydroxypropionyl-CoA dehydratase / 3-hydroxypropionyl-CoA synthetase	Anoxygenic photosynthesis in green nonsulfur bacteria
K14470	mesaconyl-CoA C1-C4 CoA transferase	Anoxygenic photosynthesis in green nonsulfur bacteria
K14471	succinyl-CoA:(S)- malate CoA transferase	Anoxygenic photosynthesis in green nonsulfur bacteria
K14471	smtA1; succinyl-CoA:(S)-malate CoA-transferase subunit A [EC:2.8.3.22]	Anoxygenic photosynthesis in green nonsulfur bacteria
K14472	succinyl-CoA:(S)- malate CoA transferase	Anoxygenic photosynthesis in green nonsulfur bacteria
K14472	smtB; succinyl-CoA:(S)-malate CoA-transferase subunit B [EC:2.8.3.22]	Anoxygenic photosynthesis in green nonsulfur bacteria
K15017	K15017; malonyl-CoA/succinyl-CoA reductase (NADPH) [EC:1.2.1.75 1.2.1.76]	Anoxygenic photosynthesis in green nonsulfur bacteria
K15017	succinyl-CoA reductase (NADPH)	Anoxygenic photosynthesis in green nonsulfur bacteria
K15018	K15018; 3-hydroxypropionyl-coenzyme A synthetase [EC:6.2.1.36]	Anoxygenic photosynthesis in green nonsulfur bacteria
K15018	3-hydroxypropionyl-coenzyme A synthetase	Anoxygenic photosynthesis in green nonsulfur bacteria
K15019	K15019; 3-hydroxypropionyl-coenzyme A dehydratase [EC:4.2.1.116]	Anoxygenic photosynthesis in green nonsulfur bacteria
K15019	3-hydroxypropionyl-coenzyme A dehydratase	Anoxygenic photosynthesis in green nonsulfur bacteria
K15020	K15020; acryloyl-coenzyme A reductase [EC:1.3.1.84]	Anoxygenic photosynthesis in green nonsulfur bacteria
K15020	acryloyl-coenzyme A reductase	Anoxygenic photosynthesis in green nonsulfur bacteria
K15039	K15039; 3-hydroxypropionate dehydrogenase (NADP+) [EC:1.1.1.298]	Anoxygenic photosynthesis in green nonsulfur bacteria
K15039	3-hydroxypropionate dehydrogenase (NADP+)	Anoxygenic photosynthesis in green nonsulfur bacteria
K15052	K15052; propionyl-CoA carboxylase [EC:6.4.1.3 2.1.3.15]	Anoxygenic photosynthesis in green nonsulfur bacteria
K15052	propionyl-CoA carboxylase	Anoxygenic photosynthesis in green nonsulfur bacteria
K00024	mdh; malate dehydrogenase [EC:1.1.1.37]	Anoxygenic photosynthesis in green sulfur bacteria
K00024	malate dehydrogenase	Anoxygenic photosynthesis in green sulfur bacteria
K00031	isocitrate dehydrogenase	Anoxygenic photosynthesis in green sulfur bacteria
K00169	pyruvate:ferredoxin oxidoreductase	Anoxygenic photosynthesis in green sulfur bacteria
K00169	porA; pyruvate ferredoxin oxidoreductase alpha subunit [EC:1.2.7.1]	Anoxygenic photosynthesis in green sulfur bacteria
K00170	pyruvate:ferredoxin oxidoreductase	Anoxygenic photosynthesis in green sulfur bacteria
K00170	porB; pyruvate ferredoxin oxidoreductase beta subunit [EC:1.2.7.1]	Anoxygenic photosynthesis in green sulfur bacteria
K00171	pyruvate:ferredoxin oxidoreductase	Anoxygenic photosynthesis in green sulfur bacteria
K00171	porD; pyruvate ferredoxin oxidoreductase delta subunit [EC:1.2.7.1]	Anoxygenic photosynthesis in green sulfur bacteria
K00172	pyruvate:ferredoxin oxidoreductase	Anoxygenic photosynthesis in green sulfur bacteria
K00172	porG; pyruvate ferredoxin oxidoreductase gamma subunit [EC:1.2.7.1]	Anoxygenic photosynthesis in green sulfur bacteria
K00174	2-oxoglutarate:ferredoxin oxidoreductase	Anoxygenic photosynthesis in green sulfur bacteria
K00174	korA, oorA, oforA; 2-oxoglutarate/2-oxoacid ferredoxin oxidoreductase subunit alpha [EC:1.2.7.3 1.2.	Anoxygenic photosynthesis in green sulfur bacteria
K00175	2-oxoglutarate:ferredoxin oxidoreductase	Anoxygenic photosynthesis in green sulfur bacteria
K00175	korB, oorB, oforB; 2-oxoglutarate/2-oxoacid ferredoxin oxidoreductase subunit beta [EC:1.2.7.3 1.2.7	Anoxygenic photosynthesis in green sulfur bacteria
K00176	2-oxoglutarate:ferredoxin oxidoreductase	Anoxygenic photosynthesis in green sulfur bacteria
K00176	korD, oorD; 2-oxoglutarate ferredoxin oxidoreductase subunit delta [EC:1.2.7.3]	Anoxygenic photosynthesis in green sulfur bacteria
K00177	2-oxoglutarate:ferredoxin oxidoreductase	Anoxygenic photosynthesis in green sulfur bacteria
K00177	korC, oorC; 2-oxoglutarate ferredoxin oxidoreductase subunit gamma [EC:1.2.7.3]	Anoxygenic photosynthesis in green sulfur bacteria
K00239	succinate dehydrogenase complex	Anoxygenic photosynthesis in green sulfur bacteria
K00240	succinate dehydrogenase complex	Anoxygenic photosynthesis in green sulfur bacteria
K00241	succinate dehydrogenase complex	Anoxygenic photosynthesis in green sulfur bacteria
K00242	succinate dehydrogenase complex	Anoxygenic photosynthesis in green sulfur bacteria
K00244	succinate dehydrogenase complex	Anoxygenic photosynthesis in green sulfur bacteria
K00245	succinate dehydrogenase complex	Anoxygenic photosynthesis in green sulfur bacteria
K00246	succinate dehydrogenase complex	Anoxygenic photosynthesis in green sulfur bacteria
K00247	succinate dehydrogenase complex	Anoxygenic photosynthesis in green sulfur bacteria
K01006	ppdK; pyruvate, orthophosphate dikinase [EC:2.7.9.1]	Anoxygenic photosynthesis in green sulfur bacteria
K01006	pyruvate,orthophosphate dikinase	Anoxygenic photosynthesis in green sulfur bacteria
K01007	pps, ppsA; pyruvate, water dikinase [EC:2.7.9.2]	Anoxygenic photosynthesis in green sulfur bacteria
K01007	pyruvate,water dikinase	Anoxygenic photosynthesis in green sulfur bacteria
K01595	ppc; phosphoenolpyruvate carboxylase [EC:4.1.1.31]	Anoxygenic photosynthesis in green sulfur bacteria
K01595	phosphoenolpyruvate carboxylase	Anoxygenic photosynthesis in green sulfur bacteria
K01676	fumarate hydratase	Anoxygenic photosynthesis in green sulfur bacteria
K01676	E4.2.1.2A, fumA, fumB; fumarate hydratase, class I [EC:4.2.1.2]	Anoxygenic photosynthesis in green sulfur bacteria
K01677	fumarate hydratase	Anoxygenic photosynthesis in green sulfur bacteria
K01678	fumarate hydratase	Anoxygenic photosynthesis in green sulfur bacteria
K01679	fumarate hydratase	Anoxygenic photosynthesis in green sulfur bacteria
K01681	aconitate hydratase	Anoxygenic photosynthesis in green sulfur bacteria
K01681	ACO, acnA; aconitate hydratase [EC:4.2.1.3]	Anoxygenic photosynthesis in green sulfur bacteria
K01682	aconitate hydratase	Anoxygenic photosynthesis in green sulfur bacteria
K01682	acnB; aconitate hydratase 2 / 2-methylisocitrate dehydratase [EC:4.2.1.3 4.2.1.99]	Anoxygenic photosynthesis in green sulfur bacteria
K01902	succinyl-CoA synthetase	Anoxygenic photosynthesis in green sulfur bacteria
K01902	sucD; succinyl-CoA synthetase alpha subunit [EC:6.2.1.5]	Anoxygenic photosynthesis in green sulfur bacteria
K01903	succinyl-CoA synthetase	Anoxygenic photosynthesis in green sulfur bacteria
K01903	sucC; succinyl-CoA synthetase beta subunit [EC:6.2.1.5]	Anoxygenic photosynthesis in green sulfur bacteria
K01958	pyruvate carboxylase subunit A	Anoxygenic photosynthesis in green sulfur bacteria
K01958	PC, pyc; pyruvate carboxylase [EC:6.4.1.1]	Anoxygenic photosynthesis in green sulfur bacteria
K01959	pyruvate carboxylase subunit A	Anoxygenic photosynthesis in green sulfur bacteria
K01959	pycA; pyruvate carboxylase subunit A [EC:6.4.1.1]	Anoxygenic photosynthesis in green sulfur bacteria
K01960	pyruvate carboxylase subunit A	Anoxygenic photosynthesis in green sulfur bacteria
K01960	pycB; pyruvate carboxylase subunit B [EC:6.4.1.1]	Anoxygenic photosynthesis in green sulfur bacteria
K03737	por, nifJ; pyruvate-ferredoxin/flavodoxin oxidoreductase [EC:1.2.7.1 1.2.7.-]	Anoxygenic photosynthesis in green sulfur bacteria
K03737	putative pyruvate-flavodoxin oxidoreductase	Anoxygenic photosynthesis in green sulfur bacteria
K08940	pscA; photosystem P840 reaction center large subunit	Anoxygenic photosynthesis in green sulfur bacteria
K08941	pscB; photosystem P840 reaction center iron-sulfur protein	Anoxygenic photosynthesis in green sulfur bacteria
K08942	pscC; photosystem P840 reaction center cytochrome c551	Anoxygenic photosynthesis in green sulfur bacteria
K08943	pscD; photosystem P840 reaction center protein PscD	Anoxygenic photosynthesis in green sulfur bacteria
K15230	ATP-citrate lyase	Anoxygenic photosynthesis in green sulfur bacteria
K15230	aclA; ATP-citrate lyase alpha-subunit [EC:2.3.3.8]	Anoxygenic photosynthesis in green sulfur bacteria
K15231	ATP-citrate lyase	Anoxygenic photosynthesis in green sulfur bacteria
K15231	aclB; ATP-citrate lyase beta-subunit [EC:2.3.3.8]	Anoxygenic photosynthesis in green sulfur bacteria
K15232	citryl-CoA synthetase	Anoxygenic photosynthesis in green sulfur bacteria
K15232	ccsA; citryl-CoA synthetase large subunit [EC:6.2.1.18]	Anoxygenic photosynthesis in green sulfur bacteria
K15233	citryl-CoA synthetase	Anoxygenic photosynthesis in green sulfur bacteria
K15233	ccsB; citryl-CoA synthetase small subunit	Anoxygenic photosynthesis in green sulfur bacteria
K15234	ccl; citryl-CoA lyase [EC:4.1.3.34]	Anoxygenic photosynthesis in green sulfur bacteria
K15234	citryl-CoA lyase	Anoxygenic photosynthesis in green sulfur bacteria
K00134	glyceraldehyde-3-phosphate dehydrogenase	Anoxygenic photosynthesis in purple bacteria
K00150	glyceraldehyde-3-phosphate dehydrogenase	Anoxygenic photosynthesis in purple bacteria
K00615	transketolase	Anoxygenic photosynthesis in purple bacteria
K00855	phosphoribulokinase (PRK)	Anoxygenic photosynthesis in purple bacteria
K00927	phosphoglycerate kinase	Anoxygenic photosynthesis in purple bacteria
K01100	sedoheptulose-bisphosphatase	Anoxygenic photosynthesis in purple bacteria
K01601	ribulose-bisphosphate carboxylase (RuBisCO)	Anoxygenic photosynthesis in purple bacteria
K01602	ribulose-bisphosphate carboxylase (RuBisCO)	Anoxygenic photosynthesis in purple bacteria
K01623	fructose-bisphosphate aldolase	Anoxygenic photosynthesis in purple bacteria
K01624	fructose-bisphosphate aldolase	Anoxygenic photosynthesis in purple bacteria
K01807	ribose 5-phosphate isomerase	Anoxygenic photosynthesis in purple bacteria
K01808	ribose 5-phosphate isomerase	Anoxygenic photosynthesis in purple bacteria
K02446	fructose-1,6-bisphosphatase	Anoxygenic photosynthesis in purple bacteria
K03841	fructose-1,6-bisphosphatase	Anoxygenic photosynthesis in purple bacteria
K04041	fructose-1,6-bisphosphatase	Anoxygenic photosynthesis in purple bacteria
K05298	glyceraldehyde-3-phosphate dehydrogenase	Anoxygenic photosynthesis in purple bacteria
K08928	pufL; photosynthetic reaction center L subunit	Anoxygenic photosynthesis in purple bacteria
K08929	pufM; photosynthetic reaction center M subunit	Anoxygenic photosynthesis in purple bacteria
K11532	fructose-1,6-bisphosphatase	Anoxygenic photosynthesis in purple bacteria
K11532	sedoheptulose-bisphosphatase	Anoxygenic photosynthesis in purple bacteria
K00031	IDH1, IDH2, icd; isocitrate dehydrogenase [EC:1.1.1.42]	Carbon fixation prokaryotes
K00194	cdhD, acsD; acetyl-CoA decarbonylase/synthase, CODH/ACS complex subunit delta [EC:2.1.1.245]	Carbon fixation prokaryotes
K00196	cooF; anaerobic carbon-monoxide dehydrogenase iron sulfur subunit	Carbon fixation prokaryotes
K00197	cdhE, acsC; acetyl-CoA decarbonylase/synthase, CODH/ACS complex subunit gamma [EC:2.1.1.245]	Carbon fixation prokaryotes
K00198	cooS, acsA; anaerobic carbon-monoxide dehydrogenase catalytic subunit [EC:1.2.7.4]	Carbon fixation prokaryotes
K00239	sdhA, frdA; succinate dehydrogenase / fumarate reductase, flavoprotein subunit [EC:1.3.5.1 1.3.5.4]	Carbon fixation prokaryotes
K00240	sdhB, frdB; succinate dehydrogenase / fumarate reductase, iron-sulfur subunit [EC:1.3.5.1 1.3.5.4]	Carbon fixation prokaryotes
K00241	sdhC, frdC; succinate dehydrogenase / fumarate reductase, cytochrome b subunit	Carbon fixation prokaryotes
K00242	sdhD, frdD; succinate dehydrogenase / fumarate reductase, membrane anchor subunit	Carbon fixation prokaryotes
K00244	frdA; fumarate reductase flavoprotein subunit [EC:1.3.5.4]	Carbon fixation prokaryotes
K00245	frdB; fumarate reductase iron-sulfur subunit [EC:1.3.5.4]	Carbon fixation prokaryotes
K00246	frdC; fumarate reductase subunit C	Carbon fixation prokaryotes
K00247	frdD; fumarate reductase subunit D	Carbon fixation prokaryotes
K00297	metF, MTHFR; methylenetetrahydrofolate reductase (NADPH) [EC:1.5.1.20]	Carbon fixation prokaryotes
K00625	E2.3.1.8, pta; phosphate acetyltransferase [EC:2.3.1.8]	Carbon fixation prokaryotes
K00626	E2.3.1.9, atoB; acetyl-CoA C-acetyltransferase [EC:2.3.1.9]	Carbon fixation prokaryotes
K00925	ackA; acetate kinase [EC:2.7.2.1]	Carbon fixation prokaryotes
K01491	folD; methylenetetrahydrofolate dehydrogenase (NADP+) / methenyltetrahydrofolate cyclohydrolase [EC:	Carbon fixation prokaryotes
K01648	ACLY; ATP citrate (pro-S)-lyase [EC:2.3.3.8]	Carbon fixation prokaryotes
K01677	E4.2.1.2AA, fumA; fumarate hydratase subunit alpha [EC:4.2.1.2]	Carbon fixation prokaryotes
K01678	E4.2.1.2AB, fumB; fumarate hydratase subunit beta [EC:4.2.1.2]	Carbon fixation prokaryotes
K01679	E4.2.1.2B, fumC, FH; fumarate hydratase, class II [EC:4.2.1.2]	Carbon fixation prokaryotes
K01847	MUT; methylmalonyl-CoA mutase [EC:5.4.99.2]	Carbon fixation prokaryotes
K01895	ACSS1_2, acs; acetyl-CoA synthetase [EC:6.2.1.1]	Carbon fixation prokaryotes
K01938	fhs; formate--tetrahydrofolate ligase [EC:6.3.4.3]	Carbon fixation prokaryotes
K01964	K01964; acetyl-CoA/propionyl-CoA carboxylase [EC:6.4.1.2 6.4.1.3]	Carbon fixation prokaryotes
K02093	apcB; allophycocyanin beta subunit	Carbon fixation prokaryotes
K02094	apcC; phycobilisome core linker protein	Carbon fixation prokaryotes
K02095	apcD; allophycocyanin-B	Carbon fixation prokaryotes
K02096	apcE; phycobilisome core-membrane linker protein	Carbon fixation prokaryotes
K02097	apcF; phycobilisome core component	Carbon fixation prokaryotes
K05299	fdhA; formate dehydrogenase (NADP+) alpha subunit [EC:1.17.1.10]	Carbon fixation prokaryotes
K11333	bchX; chlorophyllide reductase iron protein subunit X [EC:1.18.6.1]	Carbon fixation prokaryotes
K11334	bchY; chlorophyllide reductase subunit Y	Carbon fixation prokaryotes
K11335	bchZ; chlorophyllide reductase subunit Z	Carbon fixation prokaryotes
K11950	cmpA; bicarbonate transport system substrate-binding protein	Carbon fixation prokaryotes
K11951	cmpB; bicarbonate transport system permease protein	Carbon fixation prokaryotes
K11952	cmpC; bicarbonate transport system ATP-binding protein [EC:3.6.3.-]	Carbon fixation prokaryotes
K11953	cmpD; bicarbonate transport system ATP-binding protein [EC:3.6.3.-]	Carbon fixation prokaryotes
K13788	pta; phosphate acetyltransferase [EC:2.3.1.8]	Carbon fixation prokaryotes
K14138	acsB; acetyl-CoA synthase [EC:2.3.1.169]	Carbon fixation prokaryotes
K14465	K14465; succinate semialdehyde reductase (NADPH) [EC:1.1.1.-]	Carbon fixation prokaryotes
K14466	K14466; 4-hydroxybutyrate---CoA ligase (AMP-forming) [EC:6.2.1.40]	Carbon fixation prokaryotes
K14467	4hbl; 4-hydroxybutyrate---CoA ligase (AMP-forming) [EC:6.2.1.40]	Carbon fixation prokaryotes
K14470	mct; 2-methylfumaryl-CoA isomerase [EC:5.4.1.3]	Carbon fixation prokaryotes
K14534	abfD; 4-hydroxybutyryl-CoA dehydratase / vinylacetyl-CoA-Delta-isomerase [EC:4.2.1.120 5.3.3.3]	Carbon fixation prokaryotes
K15016	K15016; enoyl-CoA hydratase / 3-hydroxyacyl-CoA dehydrogenase [EC:4.2.1.17 1.1.1.35]	Carbon fixation prokaryotes
K15022	fdhB; formate dehydrogenase (NADP+) beta subunit [EC:1.17.1.10]	Carbon fixation prokaryotes
K15023	acsE; 5-methyltetrahydrofolate corrinoid/iron sulfur protein methyltransferase [EC:2.1.1.258]	Carbon fixation prokaryotes
K15024	K15024; putative phosphotransacetylase [EC:2.3.1.8]	Carbon fixation prokaryotes
K15036	K15036; acetyl-CoA/propionyl-CoA carboxylase [EC:6.4.1.2 6.4.1.3 2.1.3.15]	Carbon fixation prokaryotes
K15037	K15037; biotin carboxyl carrier protein	Carbon fixation prokaryotes
K15038	K15038; succinyl-CoA reductase [EC:1.2.1.76]	Carbon fixation prokaryotes
K18209	tfrA; fumarate reductase (CoM/CoB) subunit A [EC:1.3.4.1]	Carbon fixation prokaryotes
K18210	tfrB; fumarate reductase (CoM/CoB) subunit B [EC:1.3.4.1]	Carbon fixation prokaryotes
K18556	frdA; NADH-dependent fumarate reductase subunit A [EC:1.3.1.6]	Carbon fixation prokaryotes
K18557	frdB; NADH-dependent fumarate reductase subunit B [EC:1.3.1.6]	Carbon fixation prokaryotes
K18558	frdC; NADH-dependent fumarate reductase subunit C	Carbon fixation prokaryotes
K18559	frdD; NADH-dependent fumarate reductase subunit D	Carbon fixation prokaryotes
K18560	frdE; NADH-dependent fumarate reductase subunit E	Carbon fixation prokaryotes
K18593	E6.2.1.56; 4-hydroxybutyrate---CoA ligase (ADP-forming) [EC:6.2.1.56]	Carbon fixation prokaryotes
K18594	K18594; 3-hydroxypropionyl-CoA synthetase (ADP-forming) [EC:6.2.1.-]	Carbon fixation prokaryotes
K18602	K18602; malonic semialdehyde reductase [EC:1.1.1.-]	Carbon fixation prokaryotes
K18603	K18603; acetyl-CoA/propionyl-CoA carboxylase [EC:6.4.1.2 6.4.1.3]	Carbon fixation prokaryotes
K18604	K18604; acetyl-CoA/propionyl-CoA carboxylase [EC:6.4.1.2 6.4.1.3 2.1.3.15]	Carbon fixation prokaryotes
K18605	K18605; biotin carboxyl carrier protein	Carbon fixation prokaryotes
K18859	sdhD, frdD; succinate dehydrogenase / fumarate reductase, subunit D	Carbon fixation prokaryotes
K18860	sdhD, frdD; putative succinate dehydrogenase / fumarate reductase, subunit D	Carbon fixation prokaryotes
K18861	K18861; 4-hydroxybutyrate---CoA ligase (AMP-forming) [EC:6.2.1.40]	Carbon fixation prokaryotes
K00134	glyceraldehyde-3-phosphate dehydrogenase	Oxygenic photosynthesis
K00150	glyceraldehyde-3-phosphate dehydrogenase	Oxygenic photosynthesis
K00615	transketolase	Oxygenic photosynthesis
K00855	phosphoribulokinase (PRK)	Oxygenic photosynthesis
K00927	phosphoglycerate kinase	Oxygenic photosynthesis
K01100	sedoheptulose-bisphosphatase	Oxygenic photosynthesis
K01601	ribulose-bisphosphate carboxylase (RuBisCO)	Oxygenic photosynthesis
K01602	ribulose-bisphosphate carboxylase (RuBisCO)	Oxygenic photosynthesis
K01623	fructose-bisphosphate aldolase	Oxygenic photosynthesis
K01624	fructose-bisphosphate aldolase	Oxygenic photosynthesis
K01807	ribose 5-phosphate isomerase	Oxygenic photosynthesis
K01808	ribose 5-phosphate isomerase	Oxygenic photosynthesis
K02284	cpcA; phycocyanin alpha chain	Oxygenic photosynthesis
K02285	cpcB; phycocyanin beta chain	Oxygenic photosynthesis
K02286	cpcC; phycocyanin-associated rod linker protein	Oxygenic photosynthesis
K02287	cpcD; phycocyanin-associated, rod	Oxygenic photosynthesis
K02288	cpcE; phycocyanobilin lyase alpha subunit [EC:4.-.-.-]	Oxygenic photosynthesis
K02289	cpcF; phycocyanobilin lyase beta subunit	Oxygenic photosynthesis
K02290	cpcG; phycobilisome rod-core linker protein	Oxygenic photosynthesis
K02446	fructose-1,6-bisphosphatase	Oxygenic photosynthesis
K02634	petA; apocytochrome f	Oxygenic photosynthesis
K02635	petB; cytochrome b6	Oxygenic photosynthesis
K02636	petC; cytochrome b6-f complex iron-sulfur subunit [EC:1.10.9.1]	Oxygenic photosynthesis
K02637	petD; cytochrome b6-f complex subunit 4	Oxygenic photosynthesis
K02638	petE; plastocyanin	Oxygenic photosynthesis
K02639	petF; ferredoxin	Oxygenic photosynthesis
K02640	petG; cytochrome b6-f complex subunit 5	Oxygenic photosynthesis
K02641	petH; ferredoxin--NADP+ reductase [EC:1.18.1.2]	Oxygenic photosynthesis
K02643	petM; cytochrome b6-f complex subunit 7	Oxygenic photosynthesis
K02689	psaA; photosystem I P700 chlorophyll a apoprotein A1	Oxygenic photosynthesis
K02690	psaB; photosystem I P700 chlorophyll a apoprotein A2	Oxygenic photosynthesis
K02691	psaC; photosystem I subunit VII	Oxygenic photosynthesis
K02692	psaD; photosystem I subunit II	Oxygenic photosynthesis
K02693	psaE; photosystem I subunit IV	Oxygenic photosynthesis
K02694	psaF; photosystem I subunit III	Oxygenic photosynthesis
K02703	psbA; photosystem II reaction center D1 protein	Oxygenic photosynthesis
K02704	psbB; photosystem II CP47 chlorophyll apoprotein	Oxygenic photosynthesis
K02705	psbC; photosystem II CP43 chlorophyll apoprotein	Oxygenic photosynthesis
K02706	psbD; photosystem II reaction center D2 protein	Oxygenic photosynthesis
K02707	psbE; photosystem II cytochrome b559 subunit alpha	Oxygenic photosynthesis
K02708	psbF; photosystem II cytochrome b559 subunit beta	Oxygenic photosynthesis
K03689	petN; cytochrome b6-f complex subunit 8	Oxygenic photosynthesis
K03841	fructose-1,6-bisphosphatase	Oxygenic photosynthesis
K04041	fructose-1,6-bisphosphatase	Oxygenic photosynthesis
K05298	glyceraldehyde-3-phosphate dehydrogenase	Oxygenic photosynthesis
K05376	cpeA, mpeA; phycoerythrin alpha chain	Oxygenic photosynthesis
K05377	cpeB, mpeB; phycoerythrin beta chain	Oxygenic photosynthesis
K05378	cpeC, mpeC; phycoerythrin-associated linker protein	Oxygenic photosynthesis
K05379	cpeD, mpeD; phycoerythrin-associated linker protein	Oxygenic photosynthesis
K05380	cpeE; phycoerythrin-associated linker protein	Oxygenic photosynthesis
K05381	cpeR; phycoerythrin-associated linker protein	Oxygenic photosynthesis
K05382	cpeS; phycoerythrin-associated linker protein	Oxygenic photosynthesis
K05383	cpeT; CpeT protein	Oxygenic photosynthesis
K05384	cpeU, mpeU; bilin biosynthesis protein	Oxygenic photosynthesis
K05385	cpeY; bilin biosynthesis protein	Oxygenic photosynthesis
K05386	cpeZ; bilin biosynthesis protein	Oxygenic photosynthesis
K08906	petJ; cytochrome c6	Oxygenic photosynthesis
K11532	fructose-1,6-bisphosphatase	Oxygenic photosynthesis
K11532	sedoheptulose-bisphosphatase	Oxygenic photosynthesis
K07701	dcuS; two-component system, CitB family, sensor histidine kinase DcuS [EC:2.7.13.3]	Anaerobic fumarate respiration
K07703	dcuR; two-component system, CitB family, response regulator DcuR	Anaerobic fumarate respiration
K07792	dcuB; anaerobic C4-dicarboxylate transporter DcuB	Anaerobic fumarate respiration
K01179	E3.2.1.4; endoglucanase [EC:3.2.1.4]	Cellulose degradation
K01183	E3.2.1.14; chitinase [EC:3.2.1.14]	Chitin degradation
K01452	E3.5.1.41; chitin deacetylase [EC:3.5.1.41]	Chitin degradation
K03478	chbG; chitin disaccharide deacetylase [EC:3.5.1.105]	Chitin degradation
K13381	chiA; bifunctional chitinase/lysozyme [EC:3.2.1.14 3.2.1.17]	Chitin degradation
K17523	CHI3L1_2; chitinase-3-like protein 1/2	Chitin degradation
K17524	CHI3L3_4; chitinase 3-like 3/4	Chitin degradation
K17525	CHID1; chitinase domain-containing protein 1	Chitin degradation
K18454	deaA; chitin disaccharide deacetylase [EC:3.5.1.105]	Chitin degradation
K20547	CHIB; basic endochitinase B [EC:3.2.1.14]	Chitin degradation
K01643	citF; citrate lyase subunit alpha / citrate CoA-transferase [EC:4.1.3.6 2.8.3.10]	Citrate fermentation
K01644	citE; citrate lyase subunit beta / citryl-CoA lyase [EC:4.1.3.6 4.1.3.34]	Citrate fermentation
K01646	citD; citrate lyase subunit gamma [EC:4.1.3.6]	Citrate fermentation
K01910	citC; [citrate (pro-3S)-lyase] ligase [EC:6.2.1.22]	Citrate fermentation
K05964	citX; holo-ACP synthase [EC:2.7.7.61]	Citrate fermentation
K05966	citG; triphosphoribosyl-dephospho-CoA synthase [EC:2.7.8.25]	Citrate fermentation
K11637	citS; two-component system, CitB family, sensor histidine kinase CitS [EC:2.7.13.3]	Citrate fermentation
K11638	citT; citrate:succinate antiporter	Citrate fermentation
K11639	citM; Mg2+/citrate complex secondary transporter	Citrate fermentation
K00122	FDH; formate dehydrogenase [EC:1.2.1.2]	Formate degradation
K00122	FDH; formate dehydrogenase [EC:1.17.1.9]	Formate degradation
K00123	fdoG, fdhF, fdwA; formate dehydrogenase major subunit [EC:1.17.1.9]	Formate degradation
K00124	fdoH, fdsB; formate dehydrogenase iron-sulfur subunit	Formate degradation
NA	E1.2.1.2A; formate dehydrogenase, alpha subunit [EC:1.2.1.2]	Formate degradation
NA	E1.2.1.2B1; formate dehydrogenase, beta subunit	Formate degradation
NA	E1.2.1.2B2; formate dehydrogenase, beta subunit [EC:1.2.1.2]	Formate degradation
NA	E1.2.1.2D, fdsD; formate dehydrogenase, delta subunit [EC:1.2.1.2]	Formate degradation
NA	E1.2.1.2G; formate dehydrogenase, gamma subunit	Formate degradation
NA	E1.2.1.2NG, fdnI; formate dehydrogenase-N, gamma subunit [EC:1.2.1.2]	Formate degradation
K01198	xynB; xylan 1,4-beta-xylosidase [EC:3.2.1.37]	Hemicellulose degradation
K01190	lacZ; beta-galactosidase [EC:3.2.1.23]	Lactose degradation
K12308	bgaB, lacA; beta-galactosidase [EC:3.2.1.23]	Lactose degradation
K12309	GLB1, ELNR1; beta-galactosidase [EC:3.2.1.23]	Lactose degradation
K01046	lip, TGL2; triacylglycerol lipase [EC:3.1.1.3]	Lipids degradation
K10944	pmoA-amoA; methane/ammonia monooxygenase subunit A [EC:1.14.18.3 1.14.99.39]	Methane oxidation
K10945	pmoB-amoB; methane/ammonia monooxygenase subunit B	Methane oxidation
K10946	pmoC-amoC; methane/ammonia monooxygenase subunit C	Methane oxidation
K14028	mdh1, mxaF; methanol dehydrogenase (cytochrome c) subunit 1 [EC:1.1.2.7]	Methane oxidation
K14029	mdh2, mxaI; methanol dehydrogenase (cytochrome c) subunit 2 [EC:1.1.2.7]	Methane oxidation
K16157	mmoX; methane monooxygenase component A alpha chain [EC:1.14.13.25]	Methane oxidation
K16158	mmoY; methane monooxygenase component A beta chain [EC:1.14.13.25]	Methane oxidation
K16159	mmoZ; methane monooxygenase component A gamma chain [EC:1.14.13.25]	Methane oxidation
K16160	mmoB; methane monooxygenase regulatory protein B	Methane oxidation
K16161	mmoC; methane monooxygenase component C [EC:1.14.13.25]	Methane oxidation
K16162	mmoD; methane monooxygenase component D	Methane oxidation
K00125	fdhB; formate dehydrogenase (coenzyme F420) beta subunit [EC:1.17.98.3 1.8.98.6]	Methanogenesis
K00193	cdhC; acetyl-CoA decarbonylase/synthase, CODH/ACS complex subunit beta [EC:2.3.1.169]	Methanogenesis
K00194	cdhD, acsD; acetyl-CoA decarbonylase/synthase, CODH/ACS complex subunit delta [EC:2.1.1.245]	Methanogenesis
K00194	cdhD; acetyl-CoA decarbonylase/synthase complex subunit delta [EC:2.1.1.245]	Methanogenesis
K00197	cdhE, acsC; acetyl-CoA decarbonylase/synthase, CODH/ACS complex subunit gamma [EC:2.1.1.245]	Methanogenesis
K00197	cdhD; acetyl-CoA decarbonylase/synthase complex subunit delta [EC:2.1.1.245]	Methanogenesis
K00200	fwdA, fmdA; formylmethanofuran dehydrogenase subunit A [EC:1.2.7.12]	Methanogenesis
K00201	fwdB, fmdB; formylmethanofuran dehydrogenase subunit B [EC:1.2.7.12]	Methanogenesis
K00202	fwdC, fmdC; formylmethanofuran dehydrogenase subunit C [EC:1.2.7.12]	Methanogenesis
K00203	fwdD, fmdD; formylmethanofuran dehydrogenase subunit D [EC:1.2.7.12]	Methanogenesis
K00204	fwdH; 4Fe-4S ferredoxin	Methanogenesis
K00205	fwdF, fmdF; 4Fe-4S ferredoxin	Methanogenesis
K00319	mtd; methylenetetrahydromethanopterin dehydrogenase [EC:1.5.98.1]	Methanogenesis
K00320	mer; 5,10-methylenetetrahydromethanopterin reductase [EC:1.5.98.2]	Methanogenesis
K00399	mcrA; methyl-coenzyme M reductase alpha subunit [EC:2.8.4.1]	Methanogenesis
K00401	mcrB; methyl-coenzyme M reductase beta subunit [EC:2.8.4.1]	Methanogenesis
K00402	mcrG; methyl-coenzyme M reductase gamma subunit [EC:2.8.4.1]	Methanogenesis
K00577	mtrA; tetrahydromethanopterin S-methyltransferase subunit A [EC:2.1.1.86]	Methanogenesis
K00578	mtrB; tetrahydromethanopterin S-methyltransferase subunit B [EC:2.1.1.86]	Methanogenesis
K00579	mtrC; tetrahydromethanopterin S-methyltransferase subunit C [EC:2.1.1.86]	Methanogenesis
K00580	mtrD; tetrahydromethanopterin S-methyltransferase subunit D [EC:2.1.1.86]	Methanogenesis
K00581	mtrE; tetrahydromethanopterin S-methyltransferase subunit E [EC:2.1.1.86]	Methanogenesis
K00582	mtrF; tetrahydromethanopterin S-methyltransferase subunit F [EC:2.1.1.86]	Methanogenesis
K00583	mtrG; tetrahydromethanopterin S-methyltransferase subunit G [EC:2.1.1.86]	Methanogenesis
K00584	mtrH; tetrahydromethanopterin S-methyltransferase subunit H [EC:2.1.1.86]	Methanogenesis
K00625	E2.3.1.8, pta; phosphate acetyltransferase [EC:2.3.1.8]	Methanogenesis
K00672	ftr; formylmethanofuran--tetrahydromethanopterin N-formyltransferase [EC:2.3.1.101]	Methanogenesis
K00925	ackA; acetate kinase [EC:2.7.2.1]	Methanogenesis
K01499	mch; methenyltetrahydromethanopterin cyclohydrolase [EC:3.5.4.27]	Methanogenesis
K01895	ACSS1_2, acs; acetyl-CoA synthetase [EC:6.2.1.1]	Methanogenesis
K01907	AACS, acsA; acetoacetyl-CoA synthetase [EC:6.2.1.16]	Methanogenesis
K03388	hdrA2; heterodisulfide reductase subunit A2 [EC:1.8.7.3 1.8.98.4 1.8.98.5 1.8.98.6]	Methanogenesis
K03389	hdrB2; heterodisulfide reductase subunit B2 [EC:1.8.7.3 1.8.98.4 1.8.98.5 1.8.98.6]	Methanogenesis
K03390	hdrC2; heterodisulfide reductase subunit C2 [EC:1.8.7.3 1.8.98.4 1.8.98.5 1.8.98.6]	Methanogenesis
K03421	mcrC; methyl-coenzyme M reductase subunit C	Methanogenesis
K04480	mtaB; methanol---5-hydroxybenzimidazolylcobamide Co-methyltransferase [EC:2.1.1.90]	Methanogenesis
K05979	E3.1.3.71, comB; 2-phosphosulfolactate phosphatase [EC:3.1.3.71]	Methanogenesis
K06034	comD; sulfopyruvate decarboxylase subunit alpha [EC:4.1.1.79]	Methanogenesis
K08097	E4.4.1.19, comA; phosphosulfolactate synthase [EC:4.4.1.19]	Methanogenesis
K08264	hdrD; heterodisulfide reductase subunit D [EC:1.8.98.1]	Methanogenesis
K08265	hdrE; heterodisulfide reductase subunit E [EC:1.8.98.1]	Methanogenesis
K11260	fwdG; 4Fe-4S ferredoxin	Methanogenesis
K11261	fwdE, fmdE; formylmethanofuran dehydrogenase subunit E [EC:1.2.7.12]	Methanogenesis
K13039	comE; sulfopyruvate decarboxylase subunit beta [EC:4.1.1.79]	Methanogenesis
K13788	pta; phosphate acetyltransferase [EC:2.3.1.8]	Methanogenesis
K13942	hmd; 5,10-methenyltetrahydromethanopterin hydrogenase [EC:1.12.98.2]	Methanogenesis
K14080	mtaA; [methyl-Co(III) methanol-specific corrinoid protein]:coenzyme M methyltransferase [EC:2.1.1.24	Methanogenesis
K14081	mtaC; methanol corrinoid protein	Methanogenesis
K14082	mtbA; [methyl-Co(III) methylamine-specific corrinoid protein]:coenzyme M methyltransferase [EC:2.1.1	Methanogenesis
K14083	mttB; trimethylamine---corrinoid protein Co-methyltransferase [EC:2.1.1.250]	Methanogenesis
K14084	mttC; trimethylamine corrinoid protein	Methanogenesis
K14126	mvhA, vhuA, vhcA; F420-non-reducing hydrogenase large subunit [EC:1.12.99.- 1.8.98.5]	Methanogenesis
K14127	mvhD, vhuD, vhcD; F420-non-reducing hydrogenase iron-sulfur subunit [EC:1.12.99.- 1.8.98.5 1.8.98.6]	Methanogenesis
K14128	mvhG, vhuG, vhcG; F420-non-reducing hydrogenase small subunit [EC:1.12.99.- 1.8.98.5]	Methanogenesis
K16176	mtmB; methylamine---corrinoid protein Co-methyltransferase [EC:2.1.1.248]	Methanogenesis
K16177	mtmC; monomethylamine corrinoid protein	Methanogenesis
K16178	mtbB; dimethylamine---corrinoid protein Co-methyltransferase [EC:2.1.1.249]	Methanogenesis
K16179	mtbC; dimethylamine corrinoid protein	Methanogenesis
K22480	hdrA1; heterodisulfide reductase subunit A1 [EC:1.8.7.3]	Methanogenesis
K22481	hdrB1; heterodisulfide reductase subunit B1 [EC:1.8.7.3]	Methanogenesis
K22482	hdrC1; heterodisulfide reductase subunit C1 [EC:1.8.7.3]	Methanogenesis
K22516	fdhA; formate dehydrogenase (coenzyme F420) alpha subunit [EC:1.17.98.3 1.8.98.6]	Methanogenesis
K01051	E3.1.1.11; pectinesterase [EC:3.1.1.11]	Pectin degradation
K01184	E3.2.1.15; polygalacturonase [EC:3.2.1.15]	Pectin degradation
K01213	E3.2.1.67; galacturan 1,4-alpha-galacturonidase [EC:3.2.1.67]	Pectin degradation
K01114	plc; phospholipase C [EC:3.1.4.3]	Phospholipids degradation
K14674	TGL4; TAG lipase / steryl ester hydrolase / phospholipase A2 / LPA acyltransferase [EC:3.1.1.3 3.1.1.13 3.1.1.4 2.3.1.51]	Phospholipids degradation
K17717	pld; phospholipase D [EC:3.1.4.4]	Phospholipids degradation
K14645	K14645; serine protease [EC:3.4.21.-]	Protein degradation
K01176	AMY, amyA, malS; alpha-amylase [EC:3.2.1.1]	Starch degradation
K01178	SGA1; glucoamylase [EC:3.2.1.3]	Starch degradation
K01200	pulA; pullulanase [EC:3.2.1.41]	Starch degradation
K01208	cd, ma, nplT; cyclomaltodextrinase / maltogenic alpha-amylase / neopullulanase [EC:3.2.1.54 3.2.1.133 3.2.1.135]	Starch degradation
K01193	INV, sacA; beta-fructofuranosidase [EC:3.2.1.26]	Sucrose degradation
K14733	limB; limonene 1,2-monooxygenase [EC:1.14.13.107]	Terpene degradation
K03532	torC; trimethylamine-N-oxide reductase (cytochrome c) 1, cytochrome c-type subunit TorC	TMAO respiration
K07647	torS; two-component system, OmpR family, sensor histidine kinase TorS [EC:2.7.13.3]	TMAO respiration
K07772	torR; two-component system, OmpR family, torCAD operon response regulator TorR	TMAO respiration
K07811	torA; trimethylamine-N-oxide reductase (cytochrome c) 1 [EC:1.7.2.3]	TMAO respiration
K07680	comP; two-component system, NarL family, sensor histidine kinase ComP [EC:2.7.13.3]	Quorum sensing
K10681	saeS; two-component system, OmpR family, sensor histidine kinase SaeS [EC:2.7.13.3]	Quorum sensing
K10682	saeR; two-component system, OmpR family, response regulator SaeR	Quorum sensing
K03070	secA; preprotein translocase subunit SecA	Sec-SRP
K03071	secB; preprotein translocase subunit SecB	Sec-SRP
K03072	secD; preprotein translocase subunit SecD	Sec-SRP
K03073	secE; preprotein translocase subunit SecE	Sec-SRP
K03074	secF; preprotein translocase subunit SecF	Sec-SRP
K03075	secG; preprotein translocase subunit SecG	Sec-SRP
K03076	secY; preprotein translocase subunit SecY	Sec-SRP
K03106	SRP54, ffh; signal recognition particle subunit SRP54	Sec-SRP
K03210	yajC; preprotein translocase subunit YajC	Sec-SRP
K03217	yidC, spoIIIJ, OXA1; preprotein translocase subunit YidC	Sec-SRP
K12257	secDF; SecD/SecF fusion protein	Sec-SRP
K03110	ftsY; fused signal recognition particle receptor	Sec-SRP
K11003	hlyD, cyaD; hemolysin D	Type I secretion system
K12340	tolC; outer membrane protein	Type I secretion system
K11004	hlyB, cyaB; ATP-binding cassette, subfamily B, bacterial HlyB/CyaB	Type I secretion system
K02452	gspC; general secretion pathway protein C	Type II secretion system
K02453	gspD; general secretion pathway protein D	Type II secretion system
K02454	gspE; general secretion pathway protein E	Type II secretion system
K02455	gspF; general secretion pathway protein F	Type II secretion system
K02456	gspG; general secretion pathway protein G	Type II secretion system
K02457	gspH; general secretion pathway protein H	Type II secretion system
K02458	gspI; general secretion pathway protein I	Type II secretion system
K02459	gspJ; general secretion pathway protein J	Type II secretion system
K02460	gspK; general secretion pathway protein K	Type II secretion system
K02461	gspL; general secretion pathway protein L	Type II secretion system
K02464	gspO; general secretion pathway protein O [EC:3.4.23.43 2.1.1.-]	Type II secretion system
K03222	yscJ; type III secretion protein SctJ	Type III secretion system
K03224	yscN; ATP synthase in type III secretion protein SctN [EC:3.6.3.14]	Type III secretion system
K03226	yscR; type III secretion protein SctR	Type III secretion system
K03227	yscS; type III secretion protein SctS	Type III secretion system
K03228	yscT; type III secretion protein SctT	Type III secretion system
K03229	yscU; type III secretion protein SctU	Type III secretion system
K03230	yscV; type III secretion protein SctV	Type III secretion system
K02657	pilG; twitching motility two-component system response regulator PilG	Type IV pili
K02658	pilH; twitching motility two-component system response regulator PilH	Type IV pili
K02659	pilI; twitching motility protein PilI	Type IV pili
K02660	pilJ; twitching motility protein PilJ	Type IV pili
K02661	pilK; type IV pilus assembly protein PilK	Type IV pili
K02667	pilR; two-component system, NtrC family, response regulator PilR	Type IV pili
K02668	pilS; two-component system, NtrC family, sensor histidine kinase PilS [EC:2.7.13.3]	Type IV pili
K02650	pilA; type IV pilus assembly protein PilA	Type IV pili
K03194	virB1; type IV secretion system protein VirB1	Type IV pili
K03195	virB10, lvhB10; type IV secretion system protein VirB10	Type IV pili
K03196	virB11, lvhB11; type IV secretion system protein VirB11	Type IV pili
K03197	virB2, lvhB2; type IV secretion system protein VirB2	Type IV pili
K03198	virB3, lvhB3; type IV secretion system protein VirB3	Type IV pili
K03199	virB4, lvhB4; type IV secretion system protein VirB4	Type IV pili
K03201	virB6, lvhB6; type IV secretion system protein VirB6	Type IV pili
K03203	virB8, lvhB8; type IV secretion system protein VirB8	Type IV pili
K03204	virB9, lvhB9; type IV secretion system protein VirB9	Type IV pili
K03205	virD4, lvhD4; type IV secretion system protein VirD4	Type IV pili
K11891	impL, vasK, icmF; type VI secretion system protein ImpL	Type VI secretion system
K11892	impK, ompA, vasF, dotU; type VI secretion system protein ImpK	Type VI secretion system
K11903	hcp; type VI secretion system secreted protein Hcp	Type VI secretion system
K11904	vgrG; type VI secretion system secreted protein VgrG	Type VI secretion system
K11906	vasD, lip; type VI secretion system protein VasD	Type VI secretion system
K11907	vasG, clpV; type VI secretion system protein VasG	Type VI secretion system
K11915	stp1, pppA; serine/threonine protein phosphatase Stp1 [EC:3.1.3.16]	Type VI secretion system
K11921	ppkA; serine/threonine-protein kinase PpkA [EC:2.7.11.1]	Type VI secretion system
K10715	rpfC; two-component system, sensor histidine kinase RpfC [EC:2.7.13.3]	Virulence
K13815	rpfG; two-component system, response regulator RpfG	Virulence
K13816	rpfF; DSF synthase	Virulence
K07682	devS; two-component system, NarL family, sensor histidine kinase DevS [EC:2.7.13.3]	Virulence
K07695	devR; two-component system, NarL family, response regulator DevR	Virulence
K20932	hydrazine synthase subunit [EC:1.7.2.7]	Anammox
K20935	hdh	Anammox
K00360	nasB; assimilatory nitrate reductase electron transfer subunit [EC:1.7.99.-]	Assimilatory nitrate reduction to ammonia
K00366	nirA; ferredoxin-nitrite reductase [EC:1.7.7.1]	Assimilatory nitrate reduction to ammonia
K00367	narB; ferredoxin-nitrate reductase [EC:1.7.7.2]	Assimilatory nitrate reduction to ammonia
K00372	nasA; assimilatory nitrate reductase catalytic subunit [EC:1.7.99.-]	Assimilatory nitrate reduction to ammonia
K10534	NR; nitrate reductase (NAD(P)H) [EC:1.7.1.1 1.7.1.2 1.7.1.3]	Assimilatory nitrate reduction to ammonia
K17877	NIT-6; nitrite reductase (NAD(P)H) [EC:1.7.1.4]	Assimilatory nitrate reduction to ammonia
K00368	nirK; nitrite reductase (NO-forming) [EC:1.7.2.1]	Denitrification
K00370	narG, narZ, nxrA; nitrate reductase / nitrite oxidoreductase, alpha subunit [EC:1.7.5.1 1.7.99.-]	Denitrification
K00371	narH, narY, nxrB; nitrate reductase / nitrite oxidoreductase, beta subunit [EC:1.7.5.1 1.7.99.-]	Denitrification
K00373	narJ; nitrate reductase 1, delta subunit	Denitrification
K00374	narI, narV; nitrate reductase gamma subunit [EC:1.7.5.1 1.7.99.-]	Denitrification
K00376	nosZ; nitrous-oxide reductase [EC:1.7.2.4]	Denitrification
K02305	norC; nitric oxide reductase subunit C	Denitrification
K02448	norD; nitric-oxide reductase NorD protein [EC:1.7.99.7]	Denitrification
K02567	napA; periplasmic nitrate reductase NapA [EC:1.7.99.-]	Denitrification
K02568	napB; cytochrome c-type protein NapB	Denitrification
K04561	norB; nitric oxide reductase subunit B [EC:1.7.2.5]	Denitrification
K04747	norF; nitric-oxide reductase NorF protein [EC:1.7.99.7]	Denitrification
K15864	nirS; nitrite reductase (NO-forming) / hydroxylamine reductase [EC:1.7.2.1 1.7.99.1]	Denitrification
K00362	nirB; nitrite reductase (NADH) large subunit [EC:1.7.1.15]	Dissimilatory nitrate reduction to ammonia
K00363	nirD; nitrite reductase (NADH) small subunit [EC:1.7.1.15]	Dissimilatory nitrate reduction to ammonia
K00370	narG, narZ, nxrA; nitrate reductase / nitrite oxidoreductase, alpha subunit [EC:1.7.5.1 1.7.99.-]	Dissimilatory nitrate reduction to ammonia
K00371	narH, narY, nxrB; nitrate reductase / nitrite oxidoreductase, beta subunit [EC:1.7.5.1 1.7.99.-]	Dissimilatory nitrate reduction to ammonia
K00374	narI, narV; nitrate reductase gamma subunit [EC:1.7.5.1 1.7.99.-]	Dissimilatory nitrate reduction to ammonia
K02567	napA; periplasmic nitrate reductase NapA [EC:1.7.99.-]	Dissimilatory nitrate reduction to ammonia
K02568	napB; cytochrome c-type protein NapB	Dissimilatory nitrate reduction to ammonia
K03385	nrfA; nitrite reductase (cytochrome c-552) [EC:1.7.2.2]	Dissimilatory nitrate reduction to ammonia
K07683	nreB; two-component system, NarL family, sensor histidine kinase NreB [EC:2.7.13.3]	Dissimilatory nitrate reduction to ammonia
K07696	nreC; two-component system, NarL family, response regulator NreC	Dissimilatory nitrate reduction to ammonia
K15876	nrfH; cytochrome c nitrite reductase small subunit	Dissimilatory nitrate reduction to ammonia
K10535	hao; hydroxylamine dehydrogenase [EC:1.7.2.6]	Nitrification
K10944	pmoA-amoA; methane/ammonia monooxygenase subunit A [EC:1.14.18.3 1.14.99.39]	Nitrification
K10945	pmoB-amoB; methane/ammonia monooxygenase subunit B	Nitrification
K10946	pmoC-amoC; methane/ammonia monooxygenase subunit C	Nitrification
K00531	anfG; nitrogenase delta subunit [EC:1.18.6.1]	Nitrogen fixation
K02584	nifA; Nif-specific regulatory protein	Nitrogen fixation
K02585	nifB; nitrogen fixation protein NifB	Nitrogen fixation
K02586	nifD; nitrogenase molybdenum-iron protein alpha chain [EC:1.18.6.1]	Nitrogen fixation
K02588	nifH; nitrogenase iron protein NifH	Nitrogen fixation
K02591	nifK; nitrogenase molybdenum-iron protein beta chain [EC:1.18.6.1]	Nitrogen fixation
K02593	nifT; nitrogen fixation protein NifT	Nitrogen fixation
K13598	ntrY; two-component system, NtrC family, nitrogen regulation sensor histidine kinase NtrY [EC:2.7.13.3]	Nitrogen fixation
K13599	ntrX; two-component system, NtrC family, nitrogen regulation response regulator NtrX	Nitrogen fixation
K22896	vnfD; vanadium-dependent nitrogenase alpha chain [EC:1.18.6.2]	Nitrogen fixation
K22897	vnfK; vanadium-dependent nitrogenase beta chain [EC:1.18.6.2]	Nitrogen fixation
K22898	vnfG; vanadium nitrogenase delta subunit [EC:1.18.6.2]	Nitrogen fixation
K22899	vnfH; vanadium nitrogenase iron protein	Nitrogen fixation
K00141	xylC; benzaldehyde dehydrogenase (NAD) [EC:1.2.1.28]	Degradation of aromatic compounds
K00152	nahF; salicylaldehyde dehydrogenase [EC:1.2.1.65]	Degradation of aromatic compounds
K00217	E1.3.1.32; maleylacetate reductase [EC:1.3.1.32]	Degradation of aromatic compounds
K00446	dmpB, xylE; catechol 2,3-dioxygenase [EC:1.13.11.2]	Degradation of aromatic compounds
K00446	dmpB; catechol 2,3-dioxygenase [EC:1.13.11.2]	Degradation of aromatic compounds
K00448	pcaG; protocatechuate 3,4-dioxygenase, alpha subunit [EC:1.13.11.3]	Degradation of aromatic compounds
K00449	pcaH; protocatechuate 3,4-dioxygenase, beta subunit [EC:1.13.11.3]	Degradation of aromatic compounds
K00462	bphC; biphenyl-2,3-diol 1,2-dioxygenase [EC:1.13.11.39]	Degradation of aromatic compounds
K00480	E1.14.13.1; salicylate hydroxylase [EC:1.14.13.1]	Degradation of aromatic compounds
K00481	pobA; p-hydroxybenzoate 3-monooxygenase [EC:1.14.13.2]	Degradation of aromatic compounds
K01031	pcaI; 3-oxoadipate CoA-transferase, alpha subunit [EC:2.8.3.6]	Degradation of aromatic compounds
K01032	pcaJ; 3-oxoadipate CoA-transferase, beta subunit [EC:2.8.3.6]	Degradation of aromatic compounds
K01055	pcaD; 3-oxoadipate enol-lactonase [EC:3.1.1.24]	Degradation of aromatic compounds
K01061	E3.1.1.45; carboxymethylenebutenolidase [EC:3.1.1.45]	Degradation of aromatic compounds
K01101	E3.1.3.41; 4-nitrophenyl phosphatase [EC:3.1.3.41]	Degradation of aromatic compounds
K01502	E3.5.5.7; aliphatic nitrilase [EC:3.5.5.7]	Degradation of aromatic compounds
K01576	mdlC; benzoylformate decarboxylase [EC:4.1.1.7]	Degradation of aromatic compounds
K01607	pcaC; 4-carboxymuconolactone decarboxylase [EC:4.1.1.44]	Degradation of aromatic compounds
K01612	bsdC; vanillate/4-hydroxybenzoate decarboxylase subunit C [EC:4.1.1.- 4.1.1.61]	Degradation of aromatic compounds
K01617	dmpH, xylI, nahK; 2-oxo-3-hexenedioate decarboxylase [EC:4.1.1.77]	Degradation of aromatic compounds
K01670	nmsA; naphthyl-2-methylsuccinate synthase alpha subunit [EC:4.1.99.-]	Degradation of aromatic compounds
K01781	E5.1.2.2; mandelate racemase [EC:5.1.2.2]	Degradation of aromatic compounds
K01821	praC, xylH; 4-oxalocrotonate tautomerase [EC:5.3.2.6]	Degradation of aromatic compounds
K01856	catB; muconate cycloisomerase [EC:5.5.1.1]	Degradation of aromatic compounds
K01857	pcaB; 3-carboxy-cis,cis-muconate cycloisomerase [EC:5.5.1.2]	Degradation of aromatic compounds
K03268	todC1, bedC1, tcbAa; benzene/toluene/chlorobenzene dioxygenase subunit alpha [EC:1.14.12.3 1.14.12.1	Degradation of aromatic compounds
K03268	bedC1, todC1; benzene/toluene dioxygenase subunit alpha [EC:1.14.12.3 1.14.12.11]	Degradation of aromatic compounds
K03379	chnB; cyclohexanone monooxygenase [EC:1.14.13.22]	Degradation of aromatic compounds
K03380	E1.14.13.7; phenol 2-monooxygenase [EC:1.14.13.7]	Degradation of aromatic compounds
K03381	catA; catechol 1,2-dioxygenase [EC:1.13.11.1]	Degradation of aromatic compounds
K03382	atzB; hydroxyatrazine ethylaminohydrolase [EC:3.5.99.3]	Degradation of aromatic compounds
K03383	atzD; cyanuric acid amidohydrolase [EC:3.5.2.15]	Degradation of aromatic compounds
K03391	E1.14.13.50; pentachlorophenol monooxygenase [EC:1.14.13.50]	Degradation of aromatic compounds
K03464	catC; muconolactone D-isomerase [EC:5.3.3.4]	Degradation of aromatic compounds
K03862	vanA; vanillate monooxygenase [EC:1.14.13.82]	Degradation of aromatic compounds
K03863	vanB; vanillate monooxygenase [EC:1.14.13.82]	Degradation of aromatic compounds
K04098	E1.13.11.37; hydroxyquinol 1,2-dioxygenase [EC:1.13.11.37]	Degradation of aromatic compounds
K04099	desB, galA; gallate dioxygenase [EC:1.13.11.57]	Degradation of aromatic compounds
K04100	ligA; protocatechuate 4,5-dioxygenase, alpha chain [EC:1.13.11.8]	Degradation of aromatic compounds
K04101	ligB; protocatechuate 4,5-dioxygenase, beta chain [EC:1.13.11.8]	Degradation of aromatic compounds
K04105	hbaA; 4-hydroxybenzoate-CoA ligase [EC:6.2.1.27 6.2.1.25]	Degradation of aromatic compounds
K04107	hcrC, hbaB; 4-hydroxybenzoyl-CoA reductase subunit gamma [EC:1.3.7.9]	Degradation of aromatic compounds
K04108	hcrA, hbaC; 4-hydroxybenzoyl-CoA reductase subunit alpha [EC:1.3.7.9]	Degradation of aromatic compounds
K04109	hcrB, hbaD; 4-hydroxybenzoyl-CoA reductase subunit beta [EC:1.3.7.9]	Degradation of aromatic compounds
K04110	badA; benzoate-CoA ligase [EC:6.2.1.25]	Degradation of aromatic compounds
K04112	bcrC, badD; benzoyl-CoA reductase subunit C [EC:1.3.7.8]	Degradation of aromatic compounds
K04113	bcrB, badE; benzoyl-CoA reductase subunit B [EC:1.3.7.8]	Degradation of aromatic compounds
K04114	bcrA, badF; benzoyl-CoA reductase subunit A [EC:1.3.7.8]	Degradation of aromatic compounds
K04114	badF; benzoyl-CoA reductase subunit [EC:1.3.7.8]	Degradation of aromatic compounds
K04115	bcrD, badG; benzoyl-CoA reductase subunit D [EC:1.3.7.8]	Degradation of aromatic compounds
K04118	E1.3.1.62; pimeloyl-CoA dehydrogenase [EC:1.3.1.62]	Degradation of aromatic compounds
K05549	benA-xylX; benzoate/toluate 1,2-dioxygenase subunit alpha [EC:1.14.12.10 1.14.12.-]	Degradation of aromatic compounds
K05550	benB-xylY; benzoate/toluate 1,2-dioxygenase subunit beta [EC:1.14.12.10 1.14.12.-]	Degradation of aromatic compounds
K05783	benD-xylL; dihydroxycyclohexadiene carboxylate dehydrogenase [EC:1.3.1.25 1.3.1.-]	Degradation of aromatic compounds
K05784	benC-xylZ; benzoate/toluate 1,2-dioxygenase reductase component [EC:1.18.1.-]	Degradation of aromatic compounds
K05784	benC-xylZ; benzoate/toluate 1,2-dioxygenase electron transfer component	Degradation of aromatic compounds
K05913	E1.13.11.41; 2,4'-dihydroxyacetophenone dioxygenase [EC:1.13.11.41]	Degradation of aromatic compounds
K06035	E4.2.1.69; cyanamide hydratase [EC:4.2.1.69]	Degradation of aromatic compounds
K06281	E1.12.99.6L; hydrogenase large subunit [EC:1.12.99.6]	Degradation of aromatic compounds
K06446	DCAA; acyl-CoA dehydrogenase [EC:1.3.99.-]	Degradation of aromatic compounds
K06912	tfdA; alpha-ketoglutarate-dependent 2,4-dichlorophenoxyacetate dioxygenase [EC:1.14.11.-]	Degradation of aromatic compounds
K07104	catE; catechol 2,3-dioxygenase [EC:1.13.11.2]	Degradation of aromatic compounds
K07534	badK; cyclohex-1-ene-1-carboxyl-CoA hydratase [EC:4.2.1.-]	Degradation of aromatic compounds
K07535	badH; 2-hydroxycyclohexanecarboxyl-CoA dehydrogenase [EC:1.1.1.-]	Degradation of aromatic compounds
K07536	badI; 2-ketocyclohexanecarboxyl-CoA hydrolase [EC:3.1.2.-]	Degradation of aromatic compounds
K07537	dch; cyclohexa-1,5-dienecarbonyl-CoA hydratase [EC:4.2.1.100]	Degradation of aromatic compounds
K07538	had; 6-hydroxycyclohex-1-ene-1-carbonyl-CoA dehydrogenase [EC:1.1.1.368]	Degradation of aromatic compounds
K07539	oah; 6-oxocyclohex-1-ene-carbonyl-CoA hydrolase [EC:3.7.1.21]	Degradation of aromatic compounds
K07540	E4.1.99.11; benzylsuccinate synthase [EC:4.1.99.11]	Degradation of aromatic compounds
K07543	bbsE; benzylsuccinate CoA-transferase BbsE subunit [EC:2.8.3.15]	Degradation of aromatic compounds
K07544	bbsF; benzylsuccinate CoA-transferase BbsF subunit [EC:2.8.3.15]	Degradation of aromatic compounds
K07545	bbsG; (R)-benzylsuccinyl-CoA dehydrogenase [EC:1.3.8.3]	Degradation of aromatic compounds
K07546	bbsH; E-phenylitaconyl-CoA hydratase [EC:4.2.1.-]	Degradation of aromatic compounds
K07547	bbsC; 2-[hydroxy(phenyl)methyl]-succinyl-CoA dehydrogenase BbsC subunit [EC:1.1.1.35]	Degradation of aromatic compounds
K07548	bbsD; 2-[hydroxy(phenyl)methyl]-succinyl-CoA dehydrogenase BbsD subunit [EC:1.1.1.35]	Degradation of aromatic compounds
K07549	bbsA; benzoylsuccinyl-CoA thiolase BbsA subunit [EC:2.3.1.-]	Degradation of aromatic compounds
K07550	bbsB; benzoylsuccinyl-CoA thiolase BbsB subunit [EC:2.3.1.-]	Degradation of aromatic compounds
K07823	pcaF; 3-oxoadipyl-CoA thiolase [EC:2.3.1.174]	Degradation of aromatic compounds
K07824	CYP53A1; benzoate 4-monooxygenase [EC:1.14.14.92]	Degradation of aromatic compounds
K08686	cbdA; 2-halobenzoate 1,2-dioxygenase large subunit [EC:1.14.12.13]	Degradation of aromatic compounds
K08689	bphAa, bphA1, bphA; biphenyl 2,3-dioxygenase subunit alpha [EC:1.14.12.18]	Degradation of aromatic compounds
K08689	bphA; biphenyl 2,3-dioxygenase subunit alpha [EC:1.14.12.18]	Degradation of aromatic compounds
K08690	bphB; cis-2,3-dihydrobiphenyl-2,3-diol dehydrogenase [EC:1.3.1.56]	Degradation of aromatic compounds
K08690	bphB; cis-2,3-dihydrobiphenyl-2,3-diol dehydrogenase [EC:1.3.1.56]	Degradation of aromatic compounds
K08710	atzC; N-isopropylammelide isopropylaminohydrolase [EC:3.5.99.4]	Degradation of aromatic compounds
K09461	E1.14.13.40; anthraniloyl-CoA monooxygenase [EC:1.14.13.40]	Degradation of aromatic compounds
K10216	dmpD, xylF; 2-hydroxymuconate-semialdehyde hydrolase [EC:3.7.1.9]	Degradation of aromatic compounds
K10217	dmpC, xylG, praB; aminomuconate-semialdehyde/2-hydroxymuconate-6-semialdehyde dehydrogenase [EC:1.2.	Degradation of aromatic compounds
K10220	ligJ; 4-oxalmesaconate hydratase [EC:4.2.1.83]	Degradation of aromatic compounds
K10221	ligI; 2-pyrone-4,6-dicarboxylate lactonase [EC:3.1.1.57]	Degradation of aromatic compounds
K10222	bphD; 2,6-dioxo-6-phenylhexa-3-enoate hydrolase [EC:3.7.1.8]	Degradation of aromatic compounds
K10438	E1.14.13.63, phacB; 3-hydroxyphenylacetate 6-hydroxylase [EC:1.14.13.63]	Degradation of aromatic compounds
K10616	cymAa; p-cymene methyl-monooxygenase [EC:1.14.15.25]	Degradation of aromatic compounds
K10616	cymAa; p-cymene monooxygenase [EC:1.14.13.-]	Degradation of aromatic compounds
K10617	cymB; p-cumic alcohol dehydrogenase	Degradation of aromatic compounds
K10618	cymC; p-cumic aldehyde dehydrogenase	Degradation of aromatic compounds
K10619	cmtAb; p-cumate 2,3-dioxygenase subunit alpha [EC:1.14.12.25]	Degradation of aromatic compounds
K10619	cmtAb; p-cumate 2,3-dioxygenase subunit alpha [EC:1.14.12.-]	Degradation of aromatic compounds
K10620	cmtB; 2,3-dihydroxy-2,3-dihydro-p-cumate dehydrogenase [EC:1.3.1.58]	Degradation of aromatic compounds
K10621	cmtC, dhbA; 2,3-dihydroxy-p-cumate/2,3-dihydroxybenzoate 3,4-dioxygenase [EC:1.13.11.- 1.13.11.14]	Degradation of aromatic compounds
K10622	cmtD, dhbB; HCOMODA/2-hydroxy-3-carboxy-muconic semialdehyde decarboxylase [EC:4.1.1.-]	Degradation of aromatic compounds
K10623	cmtE; HOMODA hydrolase [EC:3.7.1.-]	Degradation of aromatic compounds
K10676	tfdB; 2,4-dichlorophenol 6-monooxygenase [EC:1.14.13.20]	Degradation of aromatic compounds
K10680	nemA; N-ethylmaleimide reductase [EC:1.-.-.-]	Degradation of aromatic compounds
K10700	ebdA; ethylbenzene hydroxylase subunit alpha [EC:1.17.99.2]	Degradation of aromatic compounds
K10701	apc; acetophenone carboxylase [EC:6.4.1.8]	Degradation of aromatic compounds
K10702	todF; 2-hydroxy-6-oxohepta-2,4-dienoate hydrolase [EC:3.7.1.25]	Degradation of aromatic compounds
K11943	nidA; PAH dioxygenase large subunit [EC:1.13.11.-]	Degradation of aromatic compounds
K11944	nidB; PAH dioxygenase small subunit [EC:1.13.11.-]	Degradation of aromatic compounds
K11945	phdF; extradiol dioxygenase [EC:1.13.11.-]	Degradation of aromatic compounds
K11946	phdG; hydratase-aldolase [EC:4.1.2.-]	Degradation of aromatic compounds
K11947	nidD; aldehyde dehydrogenase [EC:1.2.1.-]	Degradation of aromatic compounds
K14333	DHBD; 2,3-dihydroxybenzoate decarboxylase [EC:4.1.1.46]	Degradation of aromatic compounds
K14334	CMLE; carboxy-cis,cis-muconate cyclase [EC:5.5.1.5]	Degradation of aromatic compounds
K14519	aldH; NADP-dependent aldehyde dehydrogenase [EC:1.2.1.4]	Degradation of aromatic compounds
K14578	nahAb, nagAb, ndoA, nbzAb, dntAb; naphthalene 1,2-dioxygenase ferredoxin component	Degradation of aromatic compounds
K14579	nahAc, ndoB, nbzAc, dntAc; naphthalene 1,2-dioxygenase subunit alpha [EC:1.14.12.12 1.14.12.23 1.14.	Degradation of aromatic compounds
K14580	nahAd, ndoC, nbzAd, dntAd; naphthalene 1,2-dioxygenase subunit beta [EC:1.14.12.12 1.14.12.23 1.14.1	Degradation of aromatic compounds
K14581	nahAa, nagAa, ndoR, nbzAa, dntAa; naphthalene 1,2-dioxygenase ferredoxin reductase component [EC:1.1	Degradation of aromatic compounds
K14582	nahB, doxE; cis-1,2-dihydro-1,2-dihydroxynaphthalene/dibenzothiophene dihydrodiol dehydrogenase [EC:	Degradation of aromatic compounds
K14583	nahC; 1,2-dihydroxynaphthalene dioxygenase [EC:1.13.11.56]	Degradation of aromatic compounds
K14584	nahD; 2-hydroxychromene-2-carboxylate isomerase [EC:5.99.1.4]	Degradation of aromatic compounds
K14585	nahE; trans-o-hydroxybenzylidenepyruvate hydratase-aldolase [EC:4.1.2.45]	Degradation of aromatic compounds
K14599	dbfA1; dibenzofuran dioxygenase subunit alpha [EC:1.14.12.-]	Degradation of aromatic compounds
K14600	dbfA2; dibenzofuran dioxygenase subunit beta [EC:1.14.12.-]	Degradation of aromatic compounds
K14727	pcaL; 3-oxoadipate enol-lactonase / 4-carboxymuconolactone decarboxylase [EC:3.1.1.24 4.1.1.44]	Degradation of aromatic compounds
K14731	mlhB, chnC; epsilon-lactone hydrolase [EC:3.1.1.83]	Degradation of aromatic compounds
K14746	ped; (S)-1-phenylethanol dehydrogenase [EC:1.1.1.311]	Degradation of aromatic compounds
K14747	bal; benzoylacetate-CoA ligase [EC:6.2.1.-]	Degradation of aromatic compounds
K14748	etbAa; ethylbenzene dioxygenase subunit alpha [EC:1.14.12.-]	Degradation of aromatic compounds
K14749	etbAb; ethylbenzene dioxygenase subunit beta [EC:1.14.12.-]	Degradation of aromatic compounds
K14750	etbAc; ethylbenzene dioxygenase ferredoxin component	Degradation of aromatic compounds
K14751	etbC; 2,3-dihydroxyethylbenzene 1,2-dioxygenase [EC:1.13.11.-]	Degradation of aromatic compounds
K15242	pcpA; 2,6-dichloro-p-hydroquinone 1,2-dioxygenase [EC:1.13.11.-]	Degradation of aromatic compounds
K15567	nmsB; naphthyl-2-methylsuccinate synthase beta subunit [EC:4.1.99.-]	Degradation of aromatic compounds
K15568	nmsC; naphthyl-2-methylsuccinate synthase gamma subunit [EC:4.1.99.-]	Degradation of aromatic compounds
K15569	bnsE; naphthyl-2-methylsuccinate CoA transferase subunit [EC:2.8.3.-]	Degradation of aromatic compounds
K15570	bnsF; naphthyl-2-methylsuccinate CoA transferase subunit [EC:2.8.3.-]	Degradation of aromatic compounds
K15571	bnsG; naphthyl-2-methylsuccinyl-CoA dehydrogenase [EC:1.3.99.-]	Degradation of aromatic compounds
K15572	bnsH; naphthyl-2-hydroxymethylsuccinyl-CoA hydratase [EC:4.2.1.-]	Degradation of aromatic compounds
K15573	bnsC; naphthyl-2-hydroxymethylsuccinyl-CoA dehydrogenase BnsC subunit [EC:1.1.-.-]	Degradation of aromatic compounds
K15574	bnsA; naphthyl-2-oxomethyl-succinyl-CoA thiolase subunit [EC:2.3.1.-]	Degradation of aromatic compounds
K15575	bnsB; naphthyl-2-oxomethyl-succinyl-CoA thiolase subunit [EC:2.3.1.-]	Degradation of aromatic compounds
K15749	dbfB; 2,2',3-trihydroxybiphenyl dioxygenase [EC:1.13.11.-]	Degradation of aromatic compounds
K15750	bphAb, bphA2, bphE; biphenyl 2,3-dioxygenase subunit beta [EC:1.14.12.18]	Degradation of aromatic compounds
K15751	carAa; carbazole 1,9a-dioxygenase [EC:1.14.12.22]	Degradation of aromatic compounds
K15752	carAc; carbazole 1,9a-dioxygenase ferredoxin component	Degradation of aromatic compounds
K15753	carAd; carbazole 1,9a-dioxygenase ferredoxin reductase component	Degradation of aromatic compounds
K15754	carBa; 2'-aminobiphenyl-2,3-diol 1,2-dioxygenase, small subunit [EC:1.13.11.-]	Degradation of aromatic compounds
K15755	carBb; 2'-aminobiphenyl-2,3-diol 1,2-dioxygenase, large subunit [EC:1.13.11.-]	Degradation of aromatic compounds
K15756	carC; 2-hydroxy-6-oxo-6-(2'-aminophenyl)hexa-2,4-dienoate hydrolase [EC:3.7.1.13]	Degradation of aromatic compounds
K15757	xylM; toluene methyl-monooxygenase [EC:1.14.15.26]	Degradation of aromatic compounds
K15758	xylA; toluene methyl-monooxygenase electron transfer component [EC:1.18.1.3]	Degradation of aromatic compounds
K15760	tmoA, tbuA1, touA; toluene monooxygenase system protein A [EC:1.14.13.236 1.14.13.-]	Degradation of aromatic compounds
K15761	tmoB, tbuU, touB; toluene monooxygenase system protein B [EC:1.14.13.236 1.14.13.-]	Degradation of aromatic compounds
K15762	tmoC, tbuB, touC; toluene monooxygenase system ferredoxin subunit	Degradation of aromatic compounds
K15763	tmoD, tbuV, touD; toluene monooxygenase system protein D [EC:1.14.13.236 1.14.13.-]	Degradation of aromatic compounds
K15764	tmoE, tbuA2, touE; toluene monooxygenase system protein E [EC:1.14.13.236 1.14.13.-]	Degradation of aromatic compounds
K15765	tmoF, tbuC, touF; toluene monooxygenase electron transfer component [EC:1.18.1.3]	Degradation of aromatic compounds
K15768	tsaM; p-toluenesulfonate methyl-monooxygenase oxygenase component TsaM [EC:1.14.13.-]	Degradation of aromatic compounds
K15769	tsaB; p-toluenesulfonate methyl-monooxygenase reductase component TsaB [EC:1.5.1.-]	Degradation of aromatic compounds
K16242	dmpN, poxD, tomA3; phenol/toluene 2-monooxygenase (NADH) P3/A3 [EC:1.14.13.244 1.14.13.243]	Degradation of aromatic compounds
K16243	dmpL, poxB, tomA1; phenol/toluene 2-monooxygenase (NADH) P1/A1 [EC:1.14.13.244 1.14.13.243]	Degradation of aromatic compounds
K16244	dmpM, poxC, tomA2; phenol/toluene 2-monooxygenase (NADH) P2/A2 [EC:1.14.13.244 1.14.13.243]	Degradation of aromatic compounds
K16245	dmpO, poxE, tomA4; phenol/toluene 2-monooxygenase (NADH) P4/A4 [EC:1.14.13.244 1.14.13.243]	Degradation of aromatic compounds
K16246	dmpP, poxF, tomA5; phenol/toluene 2-monooxygenase (NADH) P5/A5 [EC:1.14.13.244 1.14.13.243]	Degradation of aromatic compounds
K16249	dmpK, poxA, tomA0; phenol/toluene 2-monooxygenase (NADH) P0/A0	Degradation of aromatic compounds
K16268	todC2, bedC2, tcbAb; benzene/toluene/chlorobenzene dioxygenase subunit beta [EC:1.14.12.3 1.14.12.11	Degradation of aromatic compounds
K16269	todD, tcbB; cis-1,2-dihydrobenzene-1,2-diol/chlorobenzene dihydrodiol dehydrogenase [EC:1.3.1.19 1.3	Degradation of aromatic compounds
K16270	todE; 3-methylcatechol 2,3-dioxygenase [EC:1.13.11.-]	Degradation of aromatic compounds
K16303	cmtAc; p-cumate 2,3-dioxygenase subunit beta [EC:1.14.12.25]	Degradation of aromatic compounds
K16304	cmtAd; p-cumate 2,3-dioxygenase ferredoxin component	Degradation of aromatic compounds
K17048	ebdB; ethylbenzene hydroxylase subunit beta	Degradation of aromatic compounds
K17049	ebdC; ethylbenzene hydroxylase subunit gamma	Degradation of aromatic compounds
K17754	cpnA; cyclopentanol dehydrogenase [EC:1.1.1.163]	Degradation of aromatic compounds
K18067	pht4; phthalate 4,5-cis-dihydrodiol dehydrogenase [EC:1.3.1.64]	Degradation of aromatic compounds
K18068	pht3; phthalate 4,5-dioxygenase [EC:1.14.12.7]	Degradation of aromatic compounds
K18068	E1.14.12.7; phthalate 4,5-dioxygenase [EC:1.14.12.7]	Degradation of aromatic compounds
K18069	pht2; phthalate 4,5-dioxygenase reductase component [EC:1.18.1.-]	Degradation of aromatic compounds
K18074	tphA2; terephthalate 1,2-dioxygenase oxygenase component alpha subunit [EC:1.14.12.15]	Degradation of aromatic compounds
K18075	tphA3; terephthalate 1,2-dioxygenase oxygenase component beta subunit [EC:1.14.12.15]	Degradation of aromatic compounds
K18076	tphB; 1,2-dihydroxy-3,5-cyclohexadiene-1,4-dicarboxylate dehydrogenase [EC:1.3.1.53]	Degradation of aromatic compounds
K18077	tphA1; terephthalate 1,2-dioxygenase reductase component [EC:1.18.1.-]	Degradation of aromatic compounds
K18087	bphAc, bphA3, bphF; biphenyl 2,3-dioxygenase ferredoxin component	Degradation of aromatic compounds
K18088	bphAd, bphA4, bphG; biphenyl 2,3-dioxygenase ferredoxin reductase component [EC:1.18.1.3]	Degradation of aromatic compounds
K18089	todB, tcbAc; benzene/toluene/chlorobenzene dioxygenase ferredoxin component	Degradation of aromatic compounds
K18090	todA, tcbAd; benzene/toluene/chlorobenzene dioxygenase ferredoxin reductase component [EC:1.18.1.3 1	Degradation of aromatic compounds
K18092	etbD; 2-hydroxy-6-oxo-octa-2,4-dienoate hydrolase [EC:3.7.1.-]	Degradation of aromatic compounds
K18227	cmtAa; p-cumate 2,3-dioxygenase ferredoxin reductase component [EC:1.18.1.3]	Degradation of aromatic compounds
K18251	phtAa; phthalate 3,4-dioxygenase subunit alpha [EC:1.14.12.-]	Degradation of aromatic compounds
K18252	phtAb; phthalate 3,4-dioxygenase subunit beta [EC:1.14.12.-]	Degradation of aromatic compounds
K18253	phtAc; phthalate 3,4-dioxygenase ferredoxin component	Degradation of aromatic compounds
K18254	phtAd; phthalate 3,4-dioxygenase ferredoxin reductase component [EC:1.18.1.3]	Degradation of aromatic compounds
K18255	phtB; phthalate 3,4-cis-dihydrodiol dehydrogenase [EC:1.3.1.-]	Degradation of aromatic compounds
K18257	phdE; cis-3,4-dihydrophenanthrene-3,4-diol dehydrogenase [EC:1.3.1.49]	Degradation of aromatic compounds
K18293	cymAb; p-cymene methyl-monooxygenase electron transfer component [EC:1.18.1.3]	Degradation of aromatic compounds
K18364	bphH, xylJ, tesE; 2-oxopent-4-enoate/cis-2-oxohex-4-enoate hydratase [EC:4.2.1.80 4.2.1.132]	Degradation of aromatic compounds
K18365	bphI, xylK, nahM, tesG; 4-hydroxy-2-oxovalerate/4-hydroxy-2-oxohexanoate aldolase [EC:4.1.3.39 4.1.3	Degradation of aromatic compounds
K18366	bphJ, xylQ, nahO, tesF; acetaldehyde/propanal dehydrogenase [EC:1.2.1.10 1.2.1.87]	Degradation of aromatic compounds
K19065	mobA; 3-hydroxybenzoate 4-monooxygenase [EC:1.14.13.23]	Degradation of aromatic compounds
K19515	bamB; benzoyl-CoA reductase subunit BamB [EC:1.3.-.-]	Degradation of aromatic compounds
K19516	bamC; benzoyl-CoA reductase subunit BamC [EC:1.3.-.-]	Degradation of aromatic compounds
K19958	bnsD; naphthyl-2-hydroxymethylsuccinyl-CoA dehydrogenase BnsD subunit [EC:1.1.-.-]	Degradation of aromatic compounds
K19960	chnA; cyclohexanol dehydrogenase [EC:1.1.1.245]	Degradation of aromatic compounds
K19961	chnD; 6-hydroxyhexanoate dehydrogenase [EC:1.1.1.258]	Degradation of aromatic compounds
K20808	cbdB; 2-halobenzoate 1,2-dioxygenase small subunit [EC:1.14.12.13]	Degradation of aromatic compounds
K20809	cbdC; 2-halobenzoate 1,2-dioxygenase electron transfer component [EC:1.18.1.3]	Degradation of aromatic compounds
K21759	bsdD; vanillate/4-hydroxybenzoate decarboxylase subunit D [EC:4.1.1.- 4.1.1.61]	Degradation of aromatic compounds
K22676	bphB; cis-2,3-dihydrobiphenyl-2,3-diol/cis-2,3-dihydrodiol-DDE dehydrogenase [EC:1.3.1.-]	Degradation of aromatic compounds
K22677	bphD; 2,6-dioxo-6-phenylhexa-3-enoate/TCOA hydrolase [EC:3.7.1.-]	Degradation of aromatic compounds
K22715	dxnA1; dibenzofuran dioxygenase subunit alpha [EC:1.14.12.-]	Degradation of aromatic compounds
K22716	dxnA2; dibenzofuran dioxygenase subunit beta [EC:1.14.12.-]	Degradation of aromatic compounds
K22717	dxnB; 2-hydroxy-6-oxo-6-(2-hydroxyphenoxy)-hexa-2,4-dienoate hydrolase [EC:3.7.1.-]	Degradation of aromatic compounds
K00380	cysJ; sulfite reductase (NADPH) flavoprotein alpha-component [EC:1.8.1.2]	Assimilatory sulfate reduction
K00381	cysI; sulfite reductase (NADPH) hemoprotein beta-component [EC:1.8.1.2]	Assimilatory sulfate reduction
K00390	cysH; phosphoadenosine phosphosulfate reductase [EC:1.8.4.8 1.8.4.10]	Assimilatory sulfate reduction
K00392	sir; sulfite reductase (ferredoxin) [EC:1.8.7.1]	Assimilatory sulfate reduction
K00860	cysC; adenylylsulfate kinase [EC:2.7.1.25]	Assimilatory sulfate reduction
K00955	cysNC; bifunctional enzyme CysN/CysC [EC:2.7.7.4 2.7.1.25]	Assimilatory sulfate reduction
K00956	cysN; sulfate adenylyltransferase subunit 1 [EC:2.7.7.4]	Assimilatory sulfate reduction
K00957	cysD; sulfate adenylyltransferase subunit 2 [EC:2.7.7.4]	Assimilatory sulfate reduction
K00958	sat, met3; sulfate adenylyltransferase [EC:2.7.7.4]	Assimilatory sulfate reduction
K13811	PAPSS; 3'-phosphoadenosine 5'-phosphosulfate synthase [EC:2.7.7.4 2.7.1.25]	Assimilatory sulfate reduction
K00394	aprA; adenylylsulfate reductase, subunit A [EC:1.8.99.2]	Dissimilatory sulfate reduction
K00395	aprB; adenylylsulfate reductase, subunit B [EC:1.8.99.2]	Dissimilatory sulfate reduction
K00958	sat, met3; sulfate adenylyltransferase [EC:2.7.7.4]	Dissimilatory sulfate reduction
K11180	dsrA; dissimilatory sulfite reductase alpha subunit [EC:1.8.99.5]	Dissimilatory sulfate reduction
K11181	dsrB; dissimilatory sulfite reductase beta subunit [EC:1.8.99.5]	Dissimilatory sulfate reduction
K08357	ttrA; tetrathionate reductase subunit A	Tetrathionate oxidation
K08358	ttrB; tetrathionate reductase subunit B	Tetrathionate oxidation
K08359	ttrC; tetrathionate reductase subunit C	Tetrathionate oxidation
K17222	soxA; L-cysteine S-thiosulfotransferase [EC:2.8.5.2]	Thiosulfate oxidation
K17223	soxX; L-cysteine S-thiosulfotransferase [EC:2.8.5.2]	Thiosulfate oxidation
K17224	soxB; S-sulfosulfanyl-L-cysteine sulfohydrolase [EC:3.1.6.20]	Thiosulfate oxidation
K17225	soxC; sulfane dehydrogenase subunit SoxC	Thiosulfate oxidation
K17226	soxY; sulfur-oxidizing protein SoxY	Thiosulfate oxidation
K17227	soxZ; sulfur-oxidizing protein SoxZ	Thiosulfate oxidation
K22622	soxD; S-disulfanyl-L-cysteine oxidoreductase SoxD [EC:1.8.2.6]	Thiosulfate oxidation
K07679	evgS, bvgS; two-component system, NarL family, sensor histidine kinase EvgS [EC:2.7.13.3]	Acid stress
K01139	spoT; GTP diphosphokinase / guanosine-3',5'-bis(diphosphate) 3'-diphosphatase [EC:2.7.6.5 3.1.7.2]	Amino acid starvation
K03979	obgE, cgtA, MTG2; GTPase [EC:3.6.5.-]	Amino acid starvation
K03597	rseA; sigma-E factor negative regulatory protein RseA	Anti-sigma factor
K03598	rseB; sigma-E factor negative regulatory protein RseB	Anti-sigma factor
K02755	PTS-Bgl-EIIA, bglF, bglP; PTS system, beta-glucoside-specific IIA component [EC:2.7.1.-]	C limitation
K02756	PTS-Bgl-EIIB, bglF, bglP; PTS system, beta-glucoside-specific IIB component [EC:2.7.1.-]	C limitation
K02757	PTS-Bgl-EIIC, bglF, bglP; PTS system, beta-glucoside-specific IIC component	C limitation
K15737	csiD; glutarate dioxygenase [EC:1.14.11.64]	C limitation
K10124	bglH; carbohydrate-specific outer membrane porin	C starvation
K07644	cusS, copS, silS; two-component system, OmpR family, heavy metal sensor histidine kinase CusS [EC:2.7.13.3]	Copper-silver
K07665	cusR, copR, silR; two-component system, OmpR family, copper resistance phosphate regulon response regulator CusR	Copper-silver
K07787	cusA, silA; Cu(I)/Ag(I) efflux system membrane protein CusA/SilA	Copper-silver
K07798	cusB, silB; Cu(I)/Ag(I) efflux system membrane protein CusB/SilB	Copper-silver
K03969	pspA; phage shock protein A	Envelope Stress
K07640	cpxA; two-component system, OmpR family, sensor histidine kinase CpxA [EC:2.7.13.3]	Envelope Stress
K07642	baeS, smeS; two-component system, OmpR family, sensor histidine kinase BaeS [EC:2.7.13.3]	Envelope Stress
K07664	baeR, smeR; two-component system, OmpR family, response regulator BaeR	Envelope Stress
K11617	liaS; two-component system, NarL family, sensor histidine kinase LiaS [EC:2.7.13.3]	Envelope Stress
K11618	liaR; two-component system, NarL family, response regulator LiaR	Envelope Stress
K11622	liaF; lia operon protein LiaF	Envelope Stress
K07639	rstB; two-component system, OmpR family, sensor histidine kinase RstB [EC:2.7.13.3]	General stress
K07661	rstA; two-component system, OmpR family, response regulator RstA	General stress
K01546	kdpA; K+-transporting ATPase ATPase A chain [EC:3.6.3.12]	K limitation
K01547	kdpB; K+-transporting ATPase ATPase B chain [EC:3.6.3.12]	K limitation
K01548	kdpC; K+-transporting ATPase ATPase C chain [EC:3.6.3.12]	K limitation
K07646	kdpD; two-component system, OmpR family, sensor histidine kinase KdpD [EC:2.7.13.3]	K limitation
K07667	kdpE; two-component system, OmpR family, KDP operon response regulator KdpE	K limitation
K11520	manS; two-component system, OmpR family, manganese sensing sensor histidine kinase [EC:2.7.13.3]	Mn limitation
K11521	manR; two-component system, OmpR family, manganese sensing response regulator	Mn limitation
K11601	mntC; manganese transport system substrate-binding protein	Mn limitation
K11603	mntA; manganese transport system ATP-binding protein [EC:7.2.2.5]	Mn limitation
K11602	mntB; manganese transport system permease protein	Mn limitation
K00990	glnD; [protein-PII] uridylyltransferase [EC:2.7.7.59]	N limitation
K01915	glnA, GLUL; glutamine synthetase [EC:6.3.1.2]	N limitation
K03713	glnR; MerR family transcriptional regulator, glutamine synthetase repressor	N limitation
K04751	glnB; nitrogen regulatory protein P-II 1	N limitation
K07708	glnL, ntrB; two-component system, NtrC family, nitrogen regulation sensor histidine kinase GlnL [EC:2.7.13.3]	N limitation
K07712	glnG, ntrC; two-component system, NtrC family, nitrogen regulation response regulator GlnG	N limitation
K23776	tnrA; MerR family transcriptional regulator, global nitrogen regulator	N limitation
K11326	nrsA, czcA; cation efflux system protein involved in nickel and cobalt tolerance	Nickel-Cobalt
K02000	proV; glycine betaine/proline transport system ATP-binding protein [EC:7.6.2.9]	Osmotic stress
K03307	OpuE; (GenBank) opuE; osmoregulated proline transporter	Osmotic stress
K07654	mtrB; two-component system, OmpR family, sensor histidine kinase MtrB [EC:2.7.13.3]	Osmotic stress
K07670	mtrA; two-component system, OmpR family, response regulator MtrA	Osmotic stress
K07692	degU; two-component system, NarL family, response regulator DegU	Osmotic stress
K07777	degS; two-component system, NarL family, sensor histidine kinase DegS [EC:2.7.13.3]	Osmotic stress
K05845	opuC; osmoprotectant transport system substrate-binding protein	Osmotic stress
K05846	opuBD; osmoprotectant transport system permease protein	Osmotic stress
K05847	opuA; osmoprotectant transport system ATP-binding protein	Osmotic stress
K07638	envZ; two-component system, OmpR family, osmolarity sensor histidine kinase EnvZ [EC:2.7.13.3]	Osmotic stress
K00428	E1.11.1.5; cytochrome c peroxidase [EC:1.11.1.5]	Oxidative stress
K03676	grxC, GLRX, GLRX2; glutaredoxin 3	Oxidative stress
K11065	tpx; thioredoxin-dependent peroxiredoxin [EC:1.11.1.24]	Oxidative stress
K03564	BCP, PRXQ, DOT5; thioredoxin-dependent peroxiredoxin [EC:1.11.1.24]	Oxidative stress
K00518	sodN; nickel superoxide dismutase [EC:1.15.1.1]	Oxidative stress
K01142	E3.1.11.2, xthA; exodeoxyribonuclease III [EC:3.1.11.2]	Oxidative stress
K03386	PRDX2_4, ahpC; peroxiredoxin (alkyl hydroperoxide reductase subunit C) [EC:1.11.1.15]	Oxidative stress
K03781	katE, CAT, catB, srpA; catalase [EC:1.11.1.6]	Oxidative stress
K04564	SOD2; superoxide dismutase, Fe-Mn family [EC:1.15.1.1]	Oxidative stress
K04565	SOD1; superoxide dismutase, Cu-Zn family [EC:1.15.1.1]	Oxidative stress
K09825	perR; Fur family transcriptional regulator, peroxide stress response regulator	Oxidative stress
K13639	soxR; MerR family transcriptional regulator, redox-sensitive transcriptional activator SoxR	Oxidative stress
K07773	arcA; two-component system, OmpR family, aerobic respiration control protein ArcA	Oxygen limitation
K00425	cydA; cytochrome bd ubiquinol oxidase subunit I [EC:7.1.1.7]	Oxygen limitation
K00426	cydB; cytochrome bd ubiquinol oxidase subunit II [EC:7.1.1.7]	Oxygen limitation
K01420	fnr; CRP/FNR family transcriptional regulator, anaerobic regulatory protein	Oxygen limitation
K07648	arcB; two-component system, OmpR family, aerobic respiration control sensor histidine kinase ArcB [EC:2.7.13.3]	Oxygen limitation
K07651	resE; two-component system, OmpR family, sensor histidine kinase ResE [EC:2.7.13.3]	Oxygen limitation
K07775	resD; two-component system, OmpR family, response regulator ResD	Oxygen limitation
K01077	E3.1.3.1, phoA, phoB; alkaline phosphatase [EC:3.1.3.1]	P limitation
K02040	pstS; phosphate transport system substrate-binding protein	P limitation
K07768	senX3; two-component system, OmpR family, sensor histidine kinase SenX3 [EC:2.7.13.3]	P limitation
K07776	regX3; two-component system, OmpR family, response regulator RegX3	P limitation
K03087	rpoS; RNA polymerase nonessential primary-like sigma factor	Sigma factor
K03089	rpoH; RNA polymerase sigma-32 factor	Sigma factor
K02490	spo0F; two-component system, response regulator, stage 0 sporulation protein F	Sporulation
K02491	kinA; two-component system, sporulation sensor kinase A [EC:2.7.13.3]	Sporulation
K06347	kapB; kinase-associated protein B	Sporulation
K06375	spo0B; stage 0 sporulation protein B (sporulation initiation phosphotransferase) [EC:2.7.-.-]	Sporulation
K07697	kinB; two-component system, sporulation sensor kinase B [EC:2.7.13.3]	Sporulation
K07699	spo0A; two-component system, response regulator, stage 0 sporulation protein A	Sporulation
K13532	kinD; two-component system, sporulation sensor kinase D [EC:2.7.13.3]	Sporulation
K13533	kinE; two-component system, sporulation sensor kinase E [EC:2.7.13.3]	Sporulation
K03687	GRPE; molecular chaperone GrpE	Temperature
K03704	cspA; cold shock protein	Temperature
K03705	hrcA; heat-inducible transcriptional repressor	Temperature
K04043	dnaK, HSPA9; molecular chaperone DnaK	Temperature
K04077	groEL, HSPD1; chaperonin GroEL	Temperature
K04762	hslR; ribosome-associated heat shock protein Hsp15	Temperature
K07652	vicK; two-component system, OmpR family, sensor histidine kinase VicK [EC:2.7.13.3]	Temperature
K07668	vicR; two-component system, OmpR family, response regulator VicR	Temperature
K07693	desR; two-component system, NarL family, response regulator DesR	Temperature
K07778	desK; two-component system, NarL family, sensor histidine kinase DesK [EC:2.7.13.3]	Temperature
K10255	FAD6, desA; omega-6 fatty acid desaturase (delta-12 desaturase) [EC:1.14.19.-]	Temperature
K11940	hspQ; heat shock protein HspQ	Temperature
K19768	HSP12.6; heat shock protein 12.6	Temperature
K01669	phrB; deoxyribodipyrimidine photo-lyase [EC:4.1.99.3]	UV resistance
K03701	uvrA; excinuclease ABC subunit A	UV resistance
K06009	YPS1_2; yapsin 1/2 [EC:3.4.23.41]	Cell-wall stress
K11244	WSC; cell wall integrity and stress response component	Cell-wall stress
K11245	MID2, MTL1; mating pheromone-induced death protein 2	Cell-wall stress
K19842	ROM1_2; RHO1 GDP-GTP exchange protein 1/2	Cell-wall stress
K19843	TUS1; Rho1 guanine nucleotide exchange factor TUS1	Cell-wall stress
K11230	SSK2; mitogen-activated protein kinase kinase kinase [EC:2.7.11.25]	Osmotic stress
K11231	SLN1; osomolarity two-component system, sensor histidine kinase SLN1 [EC:2.7.13.3]	Osmotic stress
K11232	YPD1; osomolarity two-component system, phosphorelay intermediate protein YPD1	Osmotic stress
K11233	SSK1; osomolarity two-component system, response regulator SSK1	Osmotic stress
K19848	HKR1; signaling mucin HKR1	Osmotic stress
K19849	MSB2; signaling mucin MSB2	Osmotic stress
K11246	SHO1; SHO1 osmosensor	Osmotic stress
K19850	OPY2; protein OPY2	Osmotic stress
K14171	AHP1; alkyl hydroperoxide reductase 1 [EC:1.11.1.24]	Oxidative stress
K11187	PRDX5; peroxiredoxin 5 [EC:1.11.1.24]	Oxidative stress
K21545	MNL1, SEB1, SEBA, COM2; C2H2 transcription facotor	Oxidative stress
K19849	MSB2; signaling mucin MSB2	Starvation
K11246	SHO1; SHO1 osmosensor	Starvation
K19850	OPY2; protein OPY2	Starvation
K10847	XPA; DNA-repair protein complementing XP-A cells	UV resistance
K00575	cheR; chemotaxis protein methyltransferase CheR [EC:2.1.1.80]	Chemotaxis
K03406	mcp; methyl-accepting chemotaxis protein	Chemotaxis
K03407	cheA; two-component system, chemotaxis family, sensor kinase CheA [EC:2.7.13.3]	Chemotaxis
K03408	cheW; purine-binding chemotaxis protein CheW	Chemotaxis
K03410	cheC; chemotaxis protein CheC	Chemotaxis
K03411	cheD; chemotaxis protein CheD [EC:3.5.1.44]	Chemotaxis
K03412	cheB; two-component system, chemotaxis family, response regulator CheB [EC:3.1.1.61]	Chemotaxis
K03413	cheY; two-component system, chemotaxis family, response regulator CheY	Chemotaxis
K03414	cheZ; chemotaxis protein CheZ	Chemotaxis
K05874	tsr; methyl-accepting chemotaxis protein I, serine sensor receptor	Chemotaxis
K05875	tar; methyl-accepting chemotaxis protein II, aspartate sensor receptor	Chemotaxis
K06596	chpA; chemosensory pili system protein ChpA (sensor histidine kinase/response regulator)	Chemotaxis
K11354	cph1; two-component system, chemotaxis family, sensor kinase Cph1 [EC:2.7.13.3]	Chemotaxis
K11355	rcp1; two-component system, chemotaxis family, response regulator Rcp1	Chemotaxis
K13924	cheBR; two-component system, chemotaxis family, CheB/CheR fusion protein [EC:2.1.1.80 3.1.1.61]	Chemotaxis
K02386	flgA; flagella basal body P-ring formation protein FlgA	Flagellum
K02387	flgB; flagellar basal-body rod protein FlgB	Flagellum
K02388	flgC; flagellar basal-body rod protein FlgC	Flagellum
K02389	flgD; flagellar basal-body rod modification protein FlgD	Flagellum
K02390	flgE; flagellar hook protein FlgE	Flagellum
K02391	flgF; flagellar basal-body rod protein FlgF	Flagellum
K02392	flgG; flagellar basal-body rod protein FlgG	Flagellum
K02393	flgH; flagellar L-ring protein precursor FlgH	Flagellum
K02394	flgI; flagellar P-ring protein precursor FlgI	Flagellum
K02396	flgK; flagellar hook-associated protein 1 FlgK	Flagellum
K02400	flhA; flagellar biosynthesis protein FlhA	Flagellum
K02401	flhB; flagellar biosynthetic protein FlhB	Flagellum
K02401	fliG; flagellar motor switch protein FliG	Flagellum
K02402	flhC; flagellar transcriptional activator FlhC	Flagellum
K02403	flhD; flagellar transcriptional activator FlhD	Flagellum
K02405	fliA; RNA polymerase sigma factor for flagellar operon FliA	Flagellum
K02406	fliC; flagellin	Flagellum
K02408	fliE; flagellar hook-basal body complex protein FliE	Flagellum
K02409	fliF; flagellar M-ring protein FliF	Flagellum
K02416	fliM; flagellar motor switch protein FliM	Flagellum
K02417	fliNY, fliN; flagellar motor switch protein FliN/FliY	Flagellum
K02418	fliOZ, fliO; flagellar protein FliO/FliZ	Flagellum
K02419	fliP; flagellar biosynthetic protein FliP	Flagellum
K02420	fliQ; flagellar biosynthetic protein FliQ	Flagellum
K02421	fliR; flagellar biosynthetic protein FliR	Flagellum
K02423	fliT; flagellar protein FliT	Flagellum
K02556	motA; chemotaxis protein MotA	Flagellum
K02557	motB; chemotaxis protein MotB	Flagellum
K10564	motC; chemotaxis protein MotC	Flagellum
K10941	flrA; sigma-54 specific transcriptional regulator, flagellar regulatory protein A	Flagellum
K10942	flrB, fleS; two-component system, sensor histidine kinase FlrB [EC:2.7.13.3]	Flagellum
K10943	flrC, fleR; two component system, response regulator FlrC	Flagellum
K13820	fliR-flhB; flagellar biosynthetic protein FliR/FlhB	Flagellum
